# Supplementary material for: Palladium/XuPhos-catalyzed enantioselective cascade Heck/intermolecular C(sp 2 )–H alkylation reaction
Source: Royal Society of Chemistry journal article supplement (doi:10.1039/d4sc00262h), 2024-01-01
Supplement: d4sc00262h1.pdf [file d4sc00262h1.pdf]

*Supporting Information*

**Palladium/Xu-Phos-catalyzed enantioselective cascade Heck/Intermolecular  
C(*sp*<sup>2</sup>)-H alkylation reaction**

Chao Fang<sup>1</sup>, Quanpu Wang<sup>1</sup>, Bing Xu<sup>1,3</sup>, Zhan-Ming Zhang<sup>1,2\*</sup> & Junliang Zhang<sup>1,3,4\*</sup>

<sup>1</sup>Department of Chemistry, Fudan University, Shanghai, 200438, P.R.China

<sup>2</sup>Fudan Zhangjiang Institute, Shanghai, 201203, P.R.China

<sup>3</sup>Zhuhai Fudan Innovation Institute, Zhuhai, Guangdong, 519000, P.R.China

<sup>4</sup>School of Chemistry and Chemical Engineering, Henan Normal University, Xinxiang, Henan, 453007, P.R.China

\*Corresponding Authors: zhanmingzhang@fudan.edu.cn; junliangzhang@fudan.edu.cn

**Contents**

|                                                                                                                                                                                  |     |
|----------------------------------------------------------------------------------------------------------------------------------------------------------------------------------|-----|
| 1. General Information.....                                                                                                                                                      | S1  |
| 2. Table S1. Screening of Solvents, Palladium Salts, Bases and silver salts for Enantioselective Cascade Heck/Intermolecular C( <i>sp</i> <sup>2</sup> )-H Alkylation Reaction . | S2  |
| 3. Table S2. Screening of Solvents, Palladium Salts, additives for C( <i>sp</i> <sup>2</sup> )-H Alkylation Reaction with oxadiazole .....                                       | S3  |
| 4. Table S3. Screening of Solvents and temperature for C( <i>sp</i> <sup>2</sup> )-H Alkylation Reaction with thiophene.....                                                     | S3  |
| 5. Table S4. Screening of Solvents, base and temperature and for C( <i>sp</i> <sup>2</sup> )-H Alkylation Reaction with benzothiophene .....                                     | S4  |
| 6. Table S5. Screening of Solvents, Palladium Salts, Bases for C( <i>sp</i> <sup>2</sup> )-H Alkylation Reaction with other fluorobenzenes with fewer fluorine atoms. ....       | S5  |
| 7. General Procedure for the Synthesis of products <b>3a-3u</b> , <b>4a-4f</b> , <b>6a-6n</b> .....                                                                              | S6  |
| 8. General Procedure for the Synthesis of products <b>8-14</b> . ....                                                                                                            | S41 |
| 9. Non-linear effect experiments.....                                                                                                                                            | S48 |
| 10. Kinetic Data: Order in Catalyst.....                                                                                                                                         | S49 |

|                                                                                                  |      |
|--------------------------------------------------------------------------------------------------|------|
| 11. Kinetic Data: Deuterium Kinetic Isotope Experiment .....                                     | S52  |
| 12. Control experiments of C <sub>6</sub> F <sub>5</sub> Ag and H/D exchanging experiments ..... | S56  |
| 13. X-Ray Structure and Crystal Data of <b>7n</b> .....                                          | S58  |
| 14. <sup>1</sup> H, <sup>19</sup> F, <sup>31</sup> P, <sup>13</sup> C NMR, HPLC Spectra.....     | S63  |
| 15. References.....                                                                              | S196 |

## 1. General Information

All reactions were carried out under an atmosphere of argon in sealed tube with magnetic stirring.  $^1\text{H}$  NMR spectra,  $^{19}\text{F}$  NMR spectra,  $^{31}\text{P}$  NMR spectra,  $^{13}\text{C}$  NMR spectra were recorded on a Bruker 300, 400 and 500 MHz spectrometer in  $\text{CDCl}_3$ . All signals are reported in ppm with the internal TMS signal at 0 ppm as a standard. Data for  $^1\text{H}$  NMR spectra are reported as follows: chemical shift (ppm, referenced to TMS; s = singlet, d = doublet, t = triplet, dd = doublet of doublets, m = multiplet), coupling constant (Hz), and integration. Data for  $^{13}\text{C}$  NMR are reported in terms of chemical shift (ppm) relative to residual solvent peak ( $\text{CDCl}_3$ : 77.0 ppm). Reactions were monitored by thin layer chromatography (TLC) using silica gel plates. Flash column chromatography was performed over silica gel (300-400 mesh). The substrates **1a-1v**, **4a-4f**, **6a-6n** were synthesized according to published procedures.<sup>1,2</sup> The spectral data of the substrates were consistent with that reported in the literature. A Sadphos kit was purchased from Daicel. The enantiomeric excesses of the products were determined by chiral stationary phase HPLC using a Chiralpak IA, IB, IC, IE, IF, IG, ODH, OJH, OZ3, ADH.

**2. Table S1. Screening of Solvents, Palladium Salts, Bases and silver salts for Enantioselective Cascade Heck/Intermolecular C(sp<sup>2</sup>)-H Alkylation Reaction<sup>a</sup>**

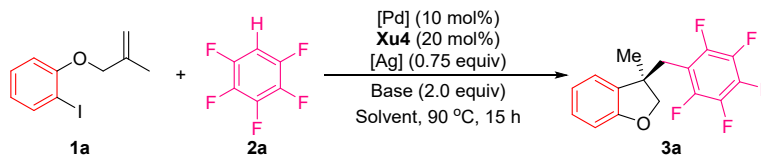

| Entry | Pd                                                    | Base                            | Solvent                        | Ag                              | <b>3a</b> Yield(%) <sup>b</sup> | <b>3a</b> <i>Ee</i> (%) <sup>c</sup> |
|-------|-------------------------------------------------------|---------------------------------|--------------------------------|---------------------------------|---------------------------------|--------------------------------------|
| 1     | Pd <sub>2</sub> (dba) <sub>3</sub>                    | K <sub>2</sub> CO <sub>3</sub>  | Et <sub>2</sub> O              | Ag <sub>2</sub> CO <sub>3</sub> | 66                              | 76                                   |
| 2     | Pd <sub>2</sub> (dba) <sub>3</sub>                    | K <sub>2</sub> CO <sub>3</sub>  | <sup>i</sup> Pr <sub>2</sub> O | Ag <sub>2</sub> CO <sub>3</sub> | 80                              | 84                                   |
| 3     | Pd <sub>2</sub> (dba) <sub>3</sub>                    | K <sub>2</sub> CO <sub>3</sub>  | MTBE                           | Ag <sub>2</sub> CO <sub>3</sub> | 74                              | 80                                   |
| 4     | Pd <sub>2</sub> (dba) <sub>3</sub>                    | K <sub>2</sub> CO <sub>3</sub>  | DCM                            | Ag <sub>2</sub> CO <sub>3</sub> | 44                              | 28                                   |
| 5     | Pd <sub>2</sub> (dba) <sub>3</sub>                    | K <sub>2</sub> CO <sub>3</sub>  | DMF                            | Ag <sub>2</sub> CO <sub>3</sub> | 10                              | 5                                    |
| 6     | Pd <sub>2</sub> (dba) <sub>3</sub>                    | K <sub>2</sub> CO <sub>3</sub>  | PhCF <sub>3</sub>              | Ag <sub>2</sub> CO <sub>3</sub> | 54                              | 68                                   |
| 7     | Pd <sub>2</sub> (dba) <sub>3</sub>                    | K <sub>2</sub> CO <sub>3</sub>  | CH <sub>3</sub> CN             | Ag <sub>2</sub> CO <sub>3</sub> | 45                              | 49                                   |
| 8     | Pd <sub>2</sub> (dba) <sub>3</sub>                    | K <sub>2</sub> CO <sub>3</sub>  | DCE                            | Ag <sub>2</sub> CO <sub>3</sub> | 48                              | 35                                   |
| 9     | Pd <sub>2</sub> (dba) <sub>3</sub>                    | K <sub>2</sub> CO <sub>3</sub>  | 1,4-Dioxane                    | Ag <sub>2</sub> CO <sub>3</sub> | 70                              | 61                                   |
| 10    | Pd <sub>2</sub> (dba) <sub>3</sub>                    | K <sub>2</sub> CO <sub>3</sub>  | DMSO                           | Ag <sub>2</sub> CO <sub>3</sub> | -                               | -                                    |
| 11    | Pd-G3                                                 | K <sub>2</sub> CO <sub>3</sub>  | <sup>i</sup> Pr <sub>2</sub> O | Ag <sub>2</sub> CO <sub>3</sub> | 76                              | 83                                   |
| 12    | Pd <sub>2</sub> (dba) <sub>3</sub> •CHCl <sub>3</sub> | K <sub>2</sub> CO <sub>3</sub>  | <sup>i</sup> Pr <sub>2</sub> O | Ag <sub>2</sub> CO <sub>3</sub> | 82                              | 88                                   |
| 13    | PdCl <sub>2</sub>                                     | K <sub>2</sub> CO <sub>3</sub>  | <sup>i</sup> Pr <sub>2</sub> O | Ag <sub>2</sub> CO <sub>3</sub> | 80                              | 78                                   |
| 14    | [PdCl(allyl)] <sub>2</sub>                            | K <sub>2</sub> CO <sub>3</sub>  | <sup>i</sup> Pr <sub>2</sub> O | Ag <sub>2</sub> CO <sub>3</sub> | 78                              | 75                                   |
| 15    | Pd(OAc) <sub>2</sub>                                  | K <sub>2</sub> CO <sub>3</sub>  | <sup>i</sup> Pr <sub>2</sub> O | Ag <sub>2</sub> CO <sub>3</sub> | 24                              | 25                                   |
| 16    | Pd(TFA) <sub>2</sub>                                  | K <sub>2</sub> CO <sub>3</sub>  | <sup>i</sup> Pr <sub>2</sub> O | Ag <sub>2</sub> CO <sub>3</sub> | 60                              | 32                                   |
| 17    | Pd(acac) <sub>2</sub>                                 | K <sub>2</sub> CO <sub>3</sub>  | <sup>i</sup> Pr <sub>2</sub> O | Ag <sub>2</sub> CO <sub>3</sub> | 15                              | 3                                    |
| 18    | Pd(MeCN) <sub>2</sub> (OTs) <sub>2</sub>              | K <sub>2</sub> CO <sub>3</sub>  | <sup>i</sup> Pr <sub>2</sub> O | Ag <sub>2</sub> CO <sub>3</sub> | 34                              | 24                                   |
| 19    | Pd(dmdba) <sub>2</sub>                                | K <sub>2</sub> CO <sub>3</sub>  | <sup>i</sup> Pr <sub>2</sub> O | Ag <sub>2</sub> CO <sub>3</sub> | 40                              | 92                                   |
| 20    | Pd <sub>2</sub> (dba) <sub>3</sub> •CHCl <sub>3</sub> | Cs <sub>2</sub> CO <sub>3</sub> | <sup>i</sup> Pr <sub>2</sub> O | Ag <sub>2</sub> CO <sub>3</sub> | 83                              | 90                                   |
| 21    | Pd <sub>2</sub> (dba) <sub>3</sub> •CHCl <sub>3</sub> | CsOAc                           | <sup>i</sup> Pr <sub>2</sub> O | Ag <sub>2</sub> CO <sub>3</sub> | 52                              | 21                                   |
| 22    | Pd <sub>2</sub> (dba) <sub>3</sub> •CHCl <sub>3</sub> | CsCO <sub>2</sub> H             | <sup>i</sup> Pr <sub>2</sub> O | Ag <sub>2</sub> CO <sub>3</sub> | -                               | -                                    |
| 23    | Pd <sub>2</sub> (dba) <sub>3</sub> •CHCl <sub>3</sub> | CsTFA                           | <sup>i</sup> Pr <sub>2</sub> O | Ag <sub>2</sub> CO <sub>3</sub> | 48                              | 4                                    |
| 24    | Pd <sub>2</sub> (dba) <sub>3</sub> •CHCl <sub>3</sub> | CsF                             | <sup>i</sup> Pr <sub>2</sub> O | Ag <sub>2</sub> CO <sub>3</sub> | 78                              | 82                                   |
| 25    | Pd <sub>2</sub> (dba) <sub>3</sub> •CHCl <sub>3</sub> | CsOPiv                          | <sup>i</sup> Pr <sub>2</sub> O | Ag <sub>2</sub> CO <sub>3</sub> | 46                              | 7                                    |
| 26    | Pd <sub>2</sub> (dba) <sub>3</sub> •CHCl <sub>3</sub> | NaO <sup>t</sup> Bu             | <sup>i</sup> Pr <sub>2</sub> O | Ag <sub>2</sub> CO <sub>3</sub> | 72                              | 65                                   |
| 27    | Pd <sub>2</sub> (dba) <sub>3</sub> •CHCl <sub>3</sub> | KO <sup>t</sup> Bu              | <sup>i</sup> Pr <sub>2</sub> O | Ag <sub>2</sub> CO <sub>3</sub> | 74                              | 63                                   |
| 28    | Pd <sub>2</sub> (dba) <sub>3</sub> •CHCl <sub>3</sub> | NaOH                            | <sup>i</sup> Pr <sub>2</sub> O | Ag <sub>2</sub> CO <sub>3</sub> | 70                              | 79                                   |



|    |                                                       |                                 |                                |                                 |       |    |
|----|-------------------------------------------------------|---------------------------------|--------------------------------|---------------------------------|-------|----|
| 29 | Pd <sub>2</sub> (dba) <sub>3</sub> •CHCl <sub>3</sub> | KOH                             | <sup>i</sup> Pr <sub>2</sub> O | Ag <sub>2</sub> CO <sub>3</sub> | 70    | 80 |
| 30 | Pd <sub>2</sub> (dba) <sub>3</sub> •CHCl <sub>3</sub> | Cs <sub>2</sub> CO <sub>3</sub> | <sup>i</sup> Pr <sub>2</sub> O | AgF                             | 58    | 85 |
| 31 | Pd <sub>2</sub> (dba) <sub>3</sub> •CHCl <sub>3</sub> | Cs <sub>2</sub> CO <sub>3</sub> | <sup>i</sup> Pr <sub>2</sub> O | AgCl                            | 68    | 88 |
| 33 | Pd <sub>2</sub> (dba) <sub>3</sub> •CHCl <sub>3</sub> | Cs <sub>2</sub> CO <sub>3</sub> | <sup>i</sup> Pr <sub>2</sub> O | AgOAc                           | 36    | 50 |
| 34 | Pd <sub>2</sub> (dba) <sub>3</sub> •CHCl <sub>3</sub> | Cs <sub>2</sub> CO <sub>3</sub> | <sup>i</sup> Pr <sub>2</sub> O | AgNO <sub>3</sub>               | 69    | 87 |
| 35 | Pd <sub>2</sub> (dba) <sub>3</sub> •CHCl <sub>3</sub> | Cs <sub>2</sub> CO <sub>3</sub> | <sup>i</sup> Pr <sub>2</sub> O | None                            | Trace | -  |

<sup>a</sup>Unless otherwise noted, all reactions were performed with 1a (0.1 mmol), 2a (0.3 mmol), Ag<sub>2</sub>CO<sub>3</sub> (0.075 mmol), Base (0.2 mmol), 10 mol% [Pd] and 20 mol% ligand in 1.0 mL solvent at 90 °C for 15-48 h. <sup>b</sup>NMR yield with CH<sub>2</sub>Br<sub>2</sub> as an internal standard. <sup>c</sup> Enantioselectivity Determined by chiral HPLC.

### 3. Table S2. Screening of Solvents, Palladium Salts, additives for

#### C(sp<sup>2</sup>)-H Alkylation Reaction with oxadiazole

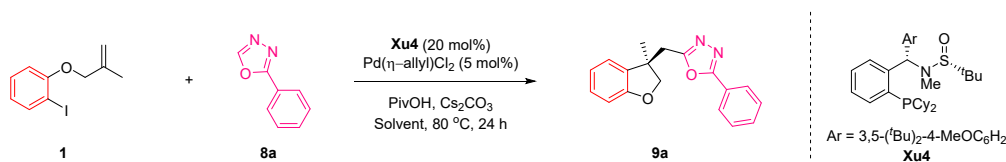

| Entry <sup>a</sup> | Solvent                        | 9a Yield(%) <sup>b</sup> | 9a Ee(%) <sup>c</sup> |
|--------------------|--------------------------------|--------------------------|-----------------------|
| 1                  | THF                            | 76                       | 76                    |
| 2                  | Et <sub>2</sub> O              | 72 (70)                  | 84                    |
| 3                  | <sup>i</sup> Pr <sub>2</sub> O | 68                       | 80                    |
| 4                  | MTBE                           | 71                       | 28                    |
| 5                  | DCM                            | 40                       | 5                     |
| 6                  | DMF                            | 28                       | 68                    |
| 7                  | PhCF <sub>3</sub>              | 42                       | 49                    |
| 8                  | CH <sub>3</sub> CN             | 85                       | 35                    |
| 9                  | DCE                            | 55                       | 61                    |
| 10                 | Dixane                         | 78                       | 88                    |

<sup>a</sup>Unless otherwise noted, all reactions were performed with 1 (0.2 mmol), 8a (0.1 mmol), PivOH (0.03 mmol), Cs<sub>2</sub>CO<sub>3</sub> (0.2 mmol), 10 mol% [Pd] and 20 mol% ligand in 1.0 mL solvent at 80 °C for 24-30 h. <sup>b</sup>NMR yield with CH<sub>2</sub>Br<sub>2</sub> as an internal standard. <sup>c</sup>Enantioselectivity Determined by chiral HPLC.

### 4. Table S3. Screening of Solvents and temperature for C(sp<sup>2</sup>)-H Alkylation Reaction with thiophene

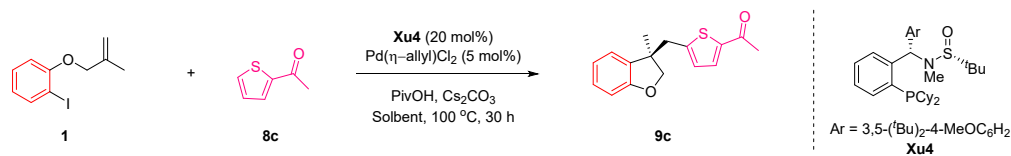

| Entry <sup>a</sup> | Solvent                    | 9c Yield(%) <sup>b</sup> | 9c Ee(%) <sup>c</sup> |
|--------------------|----------------------------|--------------------------|-----------------------|
| 1                  | THF                        | 24                       | 87                    |
| 2                  | THF                        | 46                       | 84                    |
| 3                  | Et <sub>2</sub> O          | 51                       | 91                    |
| 4                  | <i>i</i> Pr <sub>2</sub> O | 57 (52)                  | 92                    |
| 5                  | MTBE                       | 54                       | 92                    |
| 6                  | DCM                        | trace                    | -                     |
| 7                  | PhCF <sub>3</sub>          | 38                       | 91                    |
| 8                  | Tol                        | 32                       | 90                    |
| 9                  | CH <sub>3</sub> CN         | 53                       | 70                    |
| 10                 | DCE                        | trace                    | -                     |
| 11                 | Dixane                     | 57                       | 87                    |
| 12                 | DMSO                       | 30                       | 87                    |
| 13                 | DMA                        | 22                       | 87                    |

<sup>a</sup>Unless otherwise noted, all reactions were performed with 1 (0.2 mmol), 9c (0.1 mmol), PivOH (0.03 mmol), Cs<sub>2</sub>CO<sub>3</sub> (0.2 mmol), 10 mol% [Pd] and 20 mol% ligand in 1.0 mL solvent at 100 °C for 30 h. <sup>b</sup>NMR yield with CH<sub>2</sub>Br<sub>2</sub> as an internal standard. <sup>c</sup>Enantioselectivity Determined by chiral HPLC. <sup>d</sup>80 °C

## 5. Table S4. Screening of Solvents, base and temperature and for

### C(sp<sup>2</sup>)-H Alkylation Reaction with benzothiophene

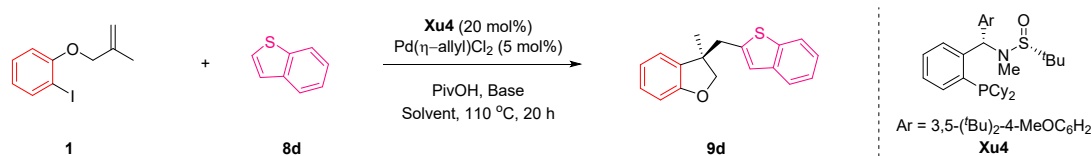

| Entry | Solvent                    | 9d Yield(%) <sup>b</sup> | 9d Ee(%) <sup>c</sup> | Entry | Base                           | 9d Yield(%) <sup>b</sup> | 9d Ee(%) <sup>c</sup> |
|-------|----------------------------|--------------------------|-----------------------|-------|--------------------------------|--------------------------|-----------------------|
| 1     | THF                        | 21                       | 70                    | 13    | K <sub>2</sub> CO <sub>3</sub> | 66                       | 76                    |
| 2     | Et <sub>2</sub> O          | 23                       | 84                    | 14    | CsTFA                          | 80                       | 84                    |
| 3     | <i>i</i> Pr <sub>2</sub> O | 18                       | 82                    | 15    | CsF                            | 74                       | 80                    |
| 4     | MTBE                       | 24                       | 82                    | 16    | CsOPiv                         | 44                       | 28                    |
| 5     | DCM                        | trace                    | -                     | 17    | NaO <sup>t</sup> Bu            | 10                       | 5                     |
| 6     | PhCF <sub>3</sub>          | 12                       | 73                    | 18    | KO <sup>t</sup> Bu             | 54                       | 68                    |
| 7     | Tol                        | 15                       | 78                    | 19    | NaOH                           | 45                       | 49                    |
| 8     | CH <sub>3</sub> CN         | 26                       | 60                    | 20    | KOH                            | 48                       | 35                    |

|    |        |       |    |                 |                                 |    |    |
|----|--------|-------|----|-----------------|---------------------------------|----|----|
| 9  | DCE    | trace | -  | 21 <sup>d</sup> | Cs <sub>2</sub> CO <sub>3</sub> | 70 | 61 |
| 10 | Dixane | 24    | 75 | 22 <sup>e</sup> | Cs <sub>2</sub> CO <sub>3</sub> | -  | -  |
| 11 | DMSO   | 78    | 13 | 23 <sup>f</sup> | NaO <sup>t</sup> Bu             | 76 | 83 |
| 12 | DMA    | 71    | 42 | 24 <sup>g</sup> | NaO <sup>t</sup> Bu             | 82 | 88 |

<sup>a</sup>Unless otherwise noted, all reactions were performed with 1a (0.1 mmol), 8d (0.3 mmol), Ag<sub>2</sub>CO<sub>3</sub> (0.075 mmol), Base (0.2 mmol), 10 mol% [Pd] and 20 mol% ligand in 1.0 mL solvent at 110 °C for 15-48 h. <sup>b</sup>NMR yield with CH<sub>2</sub>Br<sub>2</sub> as an internal standard. <sup>c</sup>Enantioselectivity Determined by chiral HPLC. <sup>d</sup>DMSO (10 uL). <sup>e</sup>DMSO (50 uL). <sup>f</sup>100 °C. <sup>g</sup>80 °C

## 6. Table S5. Screening of Solvents, Palladium Salts, Bases for C(sp<sup>2</sup>)-H Alkylation Reaction with other fluorobenzenes with fewer fluorine atoms.

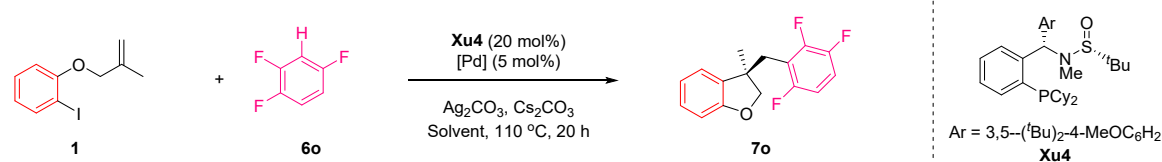

| Entry <sup>a</sup> | Pd                                                    | Base                            | Solvent                        | Ag                              | 7o Yield(%) <sup>b</sup> | 7o Ee(%) <sup>c</sup> |
|--------------------|-------------------------------------------------------|---------------------------------|--------------------------------|---------------------------------|--------------------------|-----------------------|
| 1                  | Pd <sub>2</sub> (dba) <sub>3</sub> •CHCl <sub>3</sub> | Cs <sub>2</sub> CO <sub>3</sub> | Et <sub>2</sub> O              | Ag <sub>2</sub> CO <sub>3</sub> | 48                       | 59                    |
| 2                  | Pd <sub>2</sub> (dba) <sub>3</sub> •CHCl <sub>3</sub> | Cs <sub>2</sub> CO <sub>3</sub> | <sup>i</sup> Pr <sub>2</sub> O | Ag <sub>2</sub> CO <sub>3</sub> | 51                       | 68                    |
| 3                  | Pd <sub>2</sub> (dba) <sub>3</sub> •CHCl <sub>3</sub> | Cs <sub>2</sub> CO <sub>3</sub> | MTBE                           | Ag <sub>2</sub> CO <sub>3</sub> | 46                       | 64                    |
| 4                  | Pd <sub>2</sub> (dba) <sub>3</sub> •CHCl <sub>3</sub> | Cs <sub>2</sub> CO <sub>3</sub> | DCM                            | Ag <sub>2</sub> CO <sub>3</sub> | trace                    | -                     |
| 5                  | Pd <sub>2</sub> (dba) <sub>3</sub> •CHCl <sub>3</sub> | Cs <sub>2</sub> CO <sub>3</sub> | Tol                            | Ag <sub>2</sub> CO <sub>3</sub> | 53                       | 60                    |
| 6                  | Pd <sub>2</sub> (dba) <sub>3</sub> •CHCl <sub>3</sub> | Cs <sub>2</sub> CO <sub>3</sub> | PhCF <sub>3</sub>              | Ag <sub>2</sub> CO <sub>3</sub> | 54                       | 58                    |
| 7                  | Pd <sub>2</sub> (dba) <sub>3</sub> •CHCl <sub>3</sub> | Cs <sub>2</sub> CO <sub>3</sub> | CH <sub>3</sub> CN             | Ag <sub>2</sub> CO <sub>3</sub> | trace                    | -                     |
| 8                  | Pd <sub>2</sub> (dba) <sub>3</sub> •CHCl <sub>3</sub> | Cs <sub>2</sub> CO <sub>3</sub> | Dioxane                        | Ag <sub>2</sub> CO <sub>3</sub> | 32                       | 64                    |
| 9                  | Pd <sub>2</sub> (dba) <sub>3</sub> •CHCl <sub>3</sub> | Cs <sub>2</sub> CO <sub>3</sub> | DMSO                           | Ag <sub>2</sub> CO <sub>3</sub> | trace                    | -                     |
| 10                 | Pd <sub>2</sub> (dba) <sub>3</sub> •CHCl <sub>3</sub> | Cs <sub>2</sub> CO <sub>3</sub> | DMA                            | Ag <sub>2</sub> CO <sub>3</sub> | 70                       | 20                    |
| 11                 | Pd-G3                                                 | Cs <sub>2</sub> CO <sub>3</sub> | <sup>i</sup> Pr <sub>2</sub> O | Ag <sub>2</sub> CO <sub>3</sub> | 34                       | 60                    |
| 12                 | Pd <sub>2</sub> (dba) <sub>3</sub> •CHCl <sub>3</sub> | Cs <sub>2</sub> CO <sub>3</sub> | <sup>i</sup> Pr <sub>2</sub> O | Ag <sub>2</sub> CO <sub>3</sub> | 51                       | 68                    |
| 13                 | PdCl <sub>2</sub>                                     | Cs <sub>2</sub> CO <sub>3</sub> | <sup>i</sup> Pr <sub>2</sub> O | Ag <sub>2</sub> CO <sub>3</sub> | 53                       | 66                    |
| 14                 | [PdCl(allyl)] <sub>2</sub>                            | Cs <sub>2</sub> CO <sub>3</sub> | <sup>i</sup> Pr <sub>2</sub> O | Ag <sub>2</sub> CO <sub>3</sub> | 46                       | 67                    |
| 15                 | Pd(OAc) <sub>2</sub>                                  | Cs <sub>2</sub> CO <sub>3</sub> | <sup>i</sup> Pr <sub>2</sub> O | Ag <sub>2</sub> CO <sub>3</sub> | 67                       | 54                    |
| 16                 | [Pd(dmba)Cl] <sub>2</sub>                             | Cs <sub>2</sub> CO <sub>3</sub> | <sup>i</sup> Pr <sub>2</sub> O | Ag <sub>2</sub> CO <sub>3</sub> | 55                       | 64                    |
| 17                 | Pd(cod) <sub>2</sub> Cl <sub>2</sub>                  | Cs <sub>2</sub> CO <sub>3</sub> | <sup>i</sup> Pr <sub>2</sub> O | Ag <sub>2</sub> CO <sub>3</sub> | 62                       | 60                    |
| 18                 | Pd(dba) <sub>2</sub>                                  | Cs <sub>2</sub> CO <sub>3</sub> | <sup>i</sup> Pr <sub>2</sub> O | Ag <sub>2</sub> CO <sub>3</sub> | 48                       | 67                    |

|    |                                                       |                                 |                                |                                 |       |    |
|----|-------------------------------------------------------|---------------------------------|--------------------------------|---------------------------------|-------|----|
| 19 | Pd(dmdba) <sub>2</sub>                                | Cs <sub>2</sub> CO <sub>3</sub> | <sup>i</sup> Pr <sub>2</sub> O | Ag <sub>2</sub> CO <sub>3</sub> | 69    | 62 |
| 20 | Pd <sub>2</sub> (dba) <sub>3</sub> •CHCl <sub>3</sub> | K <sub>2</sub> CO <sub>3</sub>  | <sup>i</sup> Pr <sub>2</sub> O | Ag <sub>2</sub> CO <sub>3</sub> | 51    | 67 |
| 21 | Pd <sub>2</sub> (dba) <sub>3</sub> •CHCl <sub>3</sub> | CsTFA                           | <sup>i</sup> Pr <sub>2</sub> O | Ag <sub>2</sub> CO <sub>3</sub> | 56    | 40 |
| 22 | Pd <sub>2</sub> (dba) <sub>3</sub> •CHCl <sub>3</sub> | CsF                             | <sup>i</sup> Pr <sub>2</sub> O | Ag <sub>2</sub> CO <sub>3</sub> | trace | -  |
| 23 | Pd <sub>2</sub> (dba) <sub>3</sub> •CHCl <sub>3</sub> | CsOPiv                          | <sup>i</sup> Pr <sub>2</sub> O | Ag <sub>2</sub> CO <sub>3</sub> | 15    | 11 |
| 24 | Pd <sub>2</sub> (dba) <sub>3</sub> •CHCl <sub>3</sub> | NaO <sup>t</sup> Bu             | <sup>i</sup> Pr <sub>2</sub> O | Ag <sub>2</sub> CO <sub>3</sub> | 63    | 60 |
| 25 | Pd <sub>2</sub> (dba) <sub>3</sub> •CHCl <sub>3</sub> | KO <sup>t</sup> Bu              | <sup>i</sup> Pr <sub>2</sub> O | Ag <sub>2</sub> CO <sub>3</sub> | 21    | 41 |
| 28 | Pd <sub>2</sub> (dba) <sub>3</sub> •CHCl <sub>3</sub> | NaOH                            | <sup>i</sup> Pr <sub>2</sub> O | Ag <sub>2</sub> CO <sub>3</sub> | 53    | 52 |
| 29 | Pd <sub>2</sub> (dba) <sub>3</sub> •CHCl <sub>3</sub> | KOH                             | <sup>i</sup> Pr <sub>2</sub> O | Ag <sub>2</sub> CO <sub>3</sub> | 23    | 21 |
| 30 | Pd <sub>2</sub> (dba) <sub>3</sub> •CHCl <sub>3</sub> | Cs <sub>2</sub> CO <sub>3</sub> | <sup>i</sup> Pr <sub>2</sub> O | Ag <sub>2</sub> CO <sub>3</sub> | 53    | 68 |
| 31 | Pd <sub>2</sub> (dba) <sub>3</sub> •CHCl <sub>3</sub> | CsOAc                           | <sup>i</sup> Pr <sub>2</sub> O | Ag <sub>2</sub> CO <sub>3</sub> | 30    | 25 |

<sup>a</sup>Unless otherwise noted, all reactions were performed with **1a** (0.1 mmol), **6o** (0.3 mmol), Ag<sub>2</sub>CO<sub>3</sub> (0.075 mmol), Base (0.2 mmol), 10 mol% [Pd] and 20 mol% ligand in 1.0 mL solvent at 80 °C for 20-48 h. <sup>b</sup>NMR yield with CH<sub>2</sub>Br<sub>2</sub> as an internal standard. <sup>c</sup> Enantioselectivity Determined by chiral HPLC.

## 7. General Procedure for the Synthesis of products **3a-3u**, **5a-5f**, **7a-7n**, **9a-9e**.

### Typical procedure A for the 2,3-dihydrobenzofuran derivatives.

To a 10 mL oven-dried sealed tube was added substrate **1** (0.30 mmol, 1.0 equiv.), Pd<sub>2</sub>(dba)<sub>3</sub>•CHCl<sub>3</sub> (15.5 mg, 0.015 mmol, 5 mol%), **Xu4** (38.3 mg, 0.06 mmol, 20 mol%), Cs<sub>2</sub>CO<sub>3</sub> (195.5 mg, 0.6 mmol, 3.0 equiv.), Ag<sub>2</sub>CO<sub>3</sub> (61.6 mg, 0.225 mmol, 0.75 equiv.). The flask was evacuated and refilled with argon. Then, substrate **2**, **4** or **6** (0.90 mmol, 3.0 equiv.), <sup>i</sup>Pr<sub>2</sub>O (3 mL) was added to the tube, and stirred at room temperature for 1 h. Then the mixture was stirred at 80 °C for 15-48 h. After the reaction was complete (monitored by TLC), solvent was removed under reduced pressure. The crude product was then purified by flash column chromatography on silica gel to afford the desired product **3**, **5**, **7**.

### Typical procedure B for the Heteroarene substrates derivatives.

To a 10 mL oven-dried sealed tube was added substrate **1** (0.30 mmol, 3.0 equiv.), [Pd( $\eta$ -allyl)Cl]<sub>2</sub> (5.4 mg, 0.015 mmol, 5 mol%), **Xu4** (38.3 mg, 0.06 mmol, 20 mol%),

Cs<sub>2</sub>CO<sub>3</sub> (195.5 mg, 0.6 mmol, 3.0 equiv.), PivOH (9.0 mg, 0.09 mmol, 0.03 equiv.). The flask was evacuated and refilled with argon. Then, substrate **8** (0.10 mmol, 1.0 equiv.), Et<sub>2</sub>O (3 mL) was added to the tube, and stirred at room temperature for 1 h. Then the mixture was stirred at 80 °C for 24-48 h. After the reaction was complete (monitored by TLC), solvent was removed under reduced pressure. The crude product was then purified by flash column chromatography on silica gel to afford the desired product **9**.

### 7.1 Synthesis of (*R*)-3-methyl-3-((perfluorophenyl)methyl)-2,3-dihydrobenzofuran (**3a**).

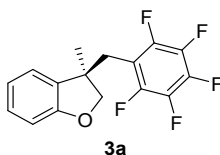

Prepared according to typical procedure **A** from allyl ether **1a** (82.2 mg, 0.3 mmol), after a flash column chromatography (hexanes: Et<sub>2</sub>O = 100:1) afforded the product **3a** as a colorless liquid (81.0 mg, 86% yield) with 92% *ee*. <sup>1</sup>H NMR (400 MHz, CDCl<sub>3</sub>) δ 7.18-7.14 (m, 1 H), 7.01 (dd, *J* = 7.5, 1.4 Hz, 1 H), 6.90-6.86 (m, 1 H), 6.77 (d, *J* = 8.0 Hz, 1 H), 4.50 (d, *J* = 9.0 Hz, 1 H), 4.11 (d, *J* = 9.0 Hz, 1 H), 3.07-2.96 (m, 2 H), 1.41 (s, 3 H). <sup>13</sup>C NMR (101 MHz, CDCl<sub>3</sub>) δ 159.33, 146.65, 144.21, 141.18 (m, *J*<sub>F</sub> = 49.2 Hz), 138.64-138.60 (m, *J*<sub>F</sub> = 79.7 Hz), 136.10, 111.57-110.24 (m, *J*<sub>F</sub> = 33.0 Hz), 133.06, 128.82, 122.80, 120.74, 109.91, 82.14 (t, *J*<sub>F</sub> = 2.5 Hz), 46.65, 32.79, 23.75. <sup>19</sup>F NMR (376 MHz, CDCl<sub>3</sub>) δ -140.33 (dd, *J* = 23.2, 8.1 Hz), -155.93, -162.34 – -162.43 (m). HRMS (EI) calculated for [C<sub>16</sub>H<sub>11</sub>F<sub>5</sub>O]<sup>+</sup>: 314.0725 found: 314.0724. Enantiomeric excess was determined by HPLC with a Chiralpak OZ3 column (hexanes = 100, 1.0 mL/min, 210 nm); minor enantiomer *tr* = 20.0 min, major enantiomer *tr* = 22.5 min. [α]<sub>D</sub><sup>20</sup> = 21.6 (*c* = 0.5, CHCl<sub>3</sub>).

### 7.2 Synthesis of (*R*)-3-((perfluorophenyl)methyl)-3-propyl-2,3-dihydrobenzofuran (**3b**).

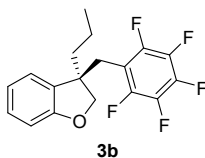

Prepared according to typical procedure from allyl ether **1b** (90.7 mg, 0.3 mmol), after a flash column chromatography (hexanes: Et<sub>2</sub>O = 100:1) afforded the product **3b** as a colorless liquid (75.8 mg, 74% yield) with 94% *ee*. <sup>1</sup>H NMR (400 MHz, CDCl<sub>3</sub>) δ 7.15-7.11 (m, 1 H), 6.95 (d, J = 7.4 Hz, 1 H), 6.87-6.81 (m, 1 H), 6.72 (d, J = 8.0 Hz, 1 H), 4.44 (d, J = 9.2 Hz, 1 H), 4.28 (d, J = 9.2 Hz, 1 H), 3.11-2.99 (m, 2 H), 1.77-1.66 (m, 2 H), 1.49-1.36 (m, 1 H), 1.22-1.07 (m, 1 H), 0.92 (t, J = 7.3 Hz, 3 H). <sup>13</sup>C NMR (101 MHz, CDCl<sub>3</sub>) δ 159.80, 146.72, 144.26, 141.14 (m, J<sub>F</sub> = 49.2 Hz), 138.56 (m, J<sub>F</sub> = 79.7 Hz), 136.04, 131.37, 128.81, 123.43, 120.52, 111.43 (m, J<sub>F</sub> = 38.0 Hz), 109.63, 79.88 (t, J<sub>F</sub> = 2.8 Hz), 50.35, 39.75, 31.64, 17.85, 14.52. <sup>19</sup>F NMR (376 MHz, CDCl<sub>3</sub>) δ -140.06 (dd, J = 22.5, 8.1 Hz), -156.10 (t, J = 20.8 Hz), -162.51– -162.65 (m). HRMS (EI) calculated for [C<sub>18</sub>H<sub>15</sub>F<sub>5</sub>O]<sup>+</sup>: 342.1038 found: 342.1035. Enantiomeric excess was determined by HPLC with a Chiralpak IA column (hexanes = 100, 1.0 mL/min, 210 nm); minor enantiomer tr = 10.0 min, major enantiomer tr = 11.0 min. [α]<sub>D</sub><sup>20</sup> = 8.3 (c = 0.3, CHCl<sub>3</sub>).

### 7.3 Synthesis of (*R*)-3-butyl-3-((perfluorophenyl)methyl)-2,3-dihydrobenzofuran (**3c**).

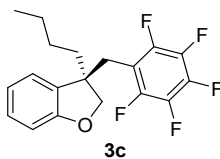

Prepared according to typical procedure from allyl ether **1c** (94.9 mg, 0.3 mmol), after a flash column chromatography (hexanes: Et<sub>2</sub>O = 100:1) afforded the product **3c** as a colorless liquid (81.2 mg, 76% yield) with 94% *ee*. <sup>1</sup>H NMR (400 MHz, CDCl<sub>3</sub>) δ 7.13 (td, J = 7.7, 1.4 Hz, 1 H), 6.94 (dd, J = 7.5, 1.4 Hz, 1 H), 6.85 (d, J = 0.9 Hz, 1 H), 6.71 (d, J = 8.0 Hz, 1 H), 4.43 (d, J = 9.2 Hz, 1 H), 4.27 (d, J = 9.2 Hz, 1 H), 3.11-2.98 (m, 2 H), 1.78-1.68 (m, 2 H), 1.42-1.26 (m, 3 H), 1.18- 1.04 (m, 1 H), 0.88 (t, J = 7.2 Hz, 3 H). <sup>13</sup>C NMR (101 MHz, CDCl<sub>3</sub>) δ 159.75, 146.67, 144.22, 141.10 (m, J<sub>F</sub> = 49.2 Hz), 138.56 (m, J<sub>F</sub> = 79.7 Hz), 136.00, 131.33, 128.78, 123.43, 120.51, 111.41 (m, J<sub>F</sub> = 38.0

Hz), 109.62, 79.85 (d,  $J_F = 2.8$  Hz), 50.25, 37.15, 31.68, 26.64, 23.17, 13.90.  $^{19}\text{F}$  NMR (376 MHz,  $\text{CDCl}_3$ )  $\delta$  -140.02 (dd,  $J = 22.6, 8.1$  Hz), -156.04 (t,  $J = 21.2$  Hz), -162.55 (td,  $J = 22.0, 8.0$  Hz). HRMS (EI) calculated for  $[\text{C}_{19}\text{H}_{17}\text{F}_5\text{O}]^+$ : 356.1194 found: 356.1198. Enantiomeric excess was determined by HPLC with a Chiralpak IA column (hexanes = 100, 1.0 mL/min, 210 nm); minor enantiomer  $t_r = 10.1$  min, major enantiomer  $t_r = 15.0$  min.  $[\alpha]_D^{20} = 8.3$  ( $c = 0.5, \text{CHCl}_3$ ).

#### 7.4 Synthesis of (*R*)-3-pentyl-3-((perfluorophenyl)methyl)-2,3-dihydrobenzofuran (**3d**).

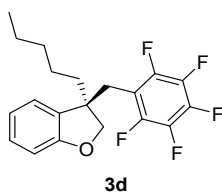

Prepared according to typical procedure from allyl ether **1d** (99.1 mg, 0.3 mmol), after a flash column chromatography (hexanes:  $\text{Et}_2\text{O} = 100:1$ ) afforded the product **3d** as a colorless liquid (84.0 mg, 76% yield) with 90% *ee*.  $^1\text{H}$  NMR (400 MHz,  $\text{CDCl}_3$ )  $\delta$  7.15-7.11 (m, 1 H), 6.95-6.93 (m, 1 H), 6.88 (td,  $J = 7.4, 1.0$  Hz, 1 H), 6.74 (dt,  $J = 8.0, 0.7$  Hz, 1 H), 4.46 (d,  $J = 9.2$  Hz, 1 H), 4.30 (d,  $J = 9.2$  Hz, 1 H), 3.11-2.98 (m, 2 H), 1.79-1.68 (m, 2 H), 1.45-1.36 (m, 1 H), 1.31-1.22 (m, 4 H), 1.17-1.09 (m, 1 H), 0.89-0.85 (m, 3 H).  $^{13}\text{C}$  NMR (101 MHz,  $\text{CDCl}_3$ )  $\delta$  159.76, 146.66, 144.22, 141.10 (m,  $J_F = 49.2$  Hz), 138.51 (m,  $J_F = 79.7$  Hz), 135.99, 131.34, 128.79, 123.41, 120.51, 111.43 (m,  $J_F = 33.0$  Hz), 109.62, 79.83 (t,  $J_F = 2.8$  Hz), 50.29, 37.37, 32.30, 31.69, 24.16, 22.45, 13.98.  $^{19}\text{F}$  NMR (376 MHz,  $\text{CDCl}_3$ )  $\delta$  -139.98 – -140.06 (m), -156.04 (t,  $J = 21.0$  Hz), -162.47 – -162.61 (m). HRMS (EI) calculated for  $[\text{C}_{20}\text{H}_{19}\text{F}_5\text{O}]^+$ : 370.1351 found: 370.1351. Enantiomeric excess was determined by HPLC with a Chiralpak IA column (hexanes: 2-propanol = 99:1, 1.0 mL/min, 210 nm); minor enantiomer  $t_r = 4.6$  min, major enantiomer  $t_r = 5.0$  min.  $[\alpha]_D^{20} = 15.3$  ( $c = 0.2, \text{CHCl}_3$ ).

#### 7.5 Synthesis of (*S*)-3-isopropyl-3-((perfluorophenyl)methyl)-2,3-dihydrobenzofuran (**3e**).

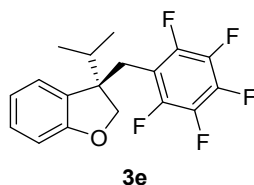

Prepared according to typical procedure from allyl ether **1e** (90.7 mg, 0.3 mmol), after a flash column chromatography (hexanes: Et<sub>2</sub>O = 100:1) afforded the product **3e** as a colorless liquid (73.2 mg, 71% yield) with 94% *ee*. <sup>1</sup>H NMR (400 MHz, CDCl<sub>3</sub>) δ 7.09 (td, *J* = 7.7, 1.4 Hz, 1 H), 6.96 (d, *J* = 7.4 Hz, 1 H), 6.82 (t, *J* = 7.4 Hz, 1 H), 6.64 (d, *J* = 8.0 Hz, 1 H), 4.36 (q, *J* = 9.5 Hz, 2 H), 3.17-3.04 (m, 2 H), 2.20-2.13 (m, *J* = 6.8 Hz, 1 H), 1.08 (d, *J* = 6.8 Hz, 3 H), 0.89 (d, *J* = 6.8 Hz, 3 H). <sup>13</sup>C NMR (101 MHz, CDCl<sub>3</sub>) δ 159.97, 146.64, 144.22, 140.99 (m, *J*<sub>F</sub> = 49.2 Hz), 138.48 (m, *J*<sub>F</sub> = 79.7 Hz), 136.08, 129.59, 128.76, 124.46 (d, *J*<sub>F</sub> = 22.2 Hz), 120.19, 111.68 (m, *J*<sub>F</sub> = 33.0 Hz), 109.38, 54.13, 33.83, 30.45, 18.58, 17.73. <sup>19</sup>F NMR (376 MHz, CDCl<sub>3</sub>) δ -139.72 (d, *J* = 15.1 Hz), -156.19, -162.80 (d, *J* = 6.2 Hz). HRMS (EI) calculated for [C<sub>18</sub>H<sub>15</sub>F<sub>5</sub>O]<sup>+</sup>: 342.1038 found: 342.1040. Enantiomeric excess was determined by HPLC with a Chiralpak IA column (hexanes = 100, 1.0 mL/min, 210 nm); minor enantiomer *tr* = 10.0 min, major enantiomer *tr* = 14.0 min. [α]<sub>D</sub><sup>20</sup> = 26.1 (*c* = 0.4, CHCl<sub>3</sub>).

7.6 Synthesis of (S)-3-cyclohexyl-3-((perfluorophenyl)methyl)-2,3-dihydrobenzofuran (**3f**).

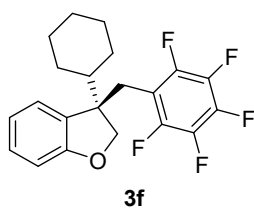

Prepared according to typical procedure from allyl ether **1f** (102.7 mg, 0.3 mmol), after a flash column chromatography (hexanes: Et<sub>2</sub>O = 100:1) afforded the product **3f** as a colorless liquid (86.7 mg, 76% yield) with 92% *ee*. <sup>1</sup>H NMR (400 MHz, CDCl<sub>3</sub>) δ 7.11-7.07 (m, 1 H), 6.90 (d, *J* = 7.4 Hz, 1 H), 6.81 (t, *J* = 7.4 Hz, 1 H), 6.64 (d, *J* = 8.0 Hz, 1 H), 4.39 (d, *J* = 9.4 Hz, 1 H), 4.32 (d, *J* = 9.4 Hz, 1 H), 3.16-3.03 (m, 2 H), 2.12 (dt, *J* = 12.9, 3.2 Hz, 1 H), 1.88-1.83 (m, 1 H), 1.78-1.68 (m, 3 H), 1.60-1.56 (m, 1 H), 1.36-0.88 (m, 6 H). <sup>13</sup>C NMR (101 MHz, CDCl<sub>3</sub>) δ 159.96, 146.67, 144.23, 140.98 (m, *J*<sub>F</sub> =



49.2 Hz), 138.37 (m,  $J_F = 79.7$  Hz), 135.87, 129.40, 128.69, 124.59, 120.09, 111.67 (m,  $J_F = 33.3$  Hz), 109.42, 53.95, 43.86, 30.11, 28.36, 27.93, 26.57, 26.36.  $^{19}\text{F}$  NMR (376 MHz,  $\text{CDCl}_3$ )  $\delta$  -139.81 – -139.89 (m), -156.25 (t,  $J = 20.9$  Hz), -162.84 (td,  $J = 22.1, 7.6$  Hz). HRMS (EI) calculated for  $[\text{C}_{21}\text{H}_{19}\text{F}_5\text{O}]^+$ : 382.1351 found: 382.1351. Enantiomeric excess was determined by HPLC with a Chiralpak IG column (hexanes: 2-propanol = 99:1, 0.3 mL/min, 210 nm); minor enantiomer  $t_r = 14.8$  min, major enantiomer  $t_r = 18.6$  min.  $[\alpha]_D^{20} = 23.6$  ( $c = 0.3, \text{CHCl}_3$ ).

### 7.7 Synthesis of (*S*)-trimethyl((3-((perfluorophenyl)methyl)-2,3-dihydrobenzofuran-3-yl)methyl)silane (**3g**).

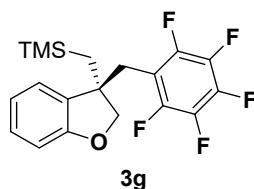

Prepared according to typical procedure from allyl ether **1g** (99.7 mg, 0.3 mmol), after a flash column chromatography (hexanes:  $\text{Et}_2\text{O} = 100:1$ ) afforded the product **3g** as a yellow liquid (82.4 mg, 75% yield) with 90% *ee*.  $^1\text{H}$  NMR (400 MHz,  $\text{CDCl}_3$ )  $\delta$  7.13-7.09 (m, 1 H), 7.03 (d,  $J = 7.4$  Hz, 1 H), 6.88-6.84 (m, 1 H), 6.68 (d,  $J = 8.0$  Hz, 1 H), 4.51 (d,  $J = 9.2$  Hz, 1 H), 4.23 (d,  $J = 9.2$  Hz, 1 H), 3.13-2.97 (m, 2 H), 1.26-1.16 (m, 2 H), -0.06 (s, 9 H).  $^{13}\text{C}$  NMR (101 MHz,  $\text{CDCl}_3$ )  $\delta$  159.11, 146.66, 144.27, 141.06 (m,  $J_F = 49.2$  Hz), 138.55 (m,  $J_F = 79.7$  Hz), 136.00, 133.17, 128.74, 123.55, 120.58, 111.58 (m,  $J_F = 33.2$  Hz), 109.61, 81.09 (t,  $J_F = 3.2$  Hz), 9.38, 35.28, 27.57, 0.06.  $^{19}\text{F}$  NMR (376 MHz,  $\text{CDCl}_3$ )  $\delta$  -139.85 (dd,  $J = 22.6, 8.0$  Hz), -156.07 (t,  $J = 20.8$  Hz), -162.51 – -162.65 (m). HRMS (ESI) calculated for  $[\text{M}+\text{H}]^+ = [\text{C}_{19}\text{H}_{20}\text{F}_5\text{OSi}]^+$ : 387.1198 found: 387.1204. Enantiomeric excess was determined by HPLC with a Chiralpak ODH column (hexanes = 100, 1.0 mL/min, 210 nm); minor enantiomer  $t_r = 8.9$  min, major enantiomer  $t_r = 9.6$  min.  $[\alpha]_D^{20} = 4.2$  ( $c = 0.5, \text{CHCl}_3$ ).

### 7.8 Synthesis of methyl (*R*)-4-(3-((perfluorophenyl)methyl)-2,3-dihydrobenzofuran-3-yl)butanoate (**3h**).

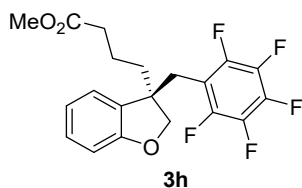

Prepared according to typical procedure from allyl ether **1h** (108.1 mg, 0.3 mmol), after a flash column chromatography (hexanes: Et<sub>2</sub>O = 20:1) afforded the product **3h** as a light yellow liquid (92.4 mg, 77% yield) with 90% *ee*. <sup>1</sup>H NMR (400 MHz, CDCl<sub>3</sub>) δ 7.15-7.11 (m, 1 H), 6.95 (d, *J* = 7.7 Hz, 1 H), 6.88-6.83 (m, 1 H), 6.71 (dd, *J* = 8.2, 2.4 Hz, 1 H), 4.44 (dd, *J* = 9.2, 2.6 Hz, 1 H), 4.30 (dd, *J* = 9.2, 2.6 Hz, 1 H), 3.65 (d, *J* = 2.5 Hz, 3 H), 3.05 (q, *J* = 13.8 Hz, 2 H), 2.32-2.28 (m, 2 H), 1.76 (d, *J* = 6.7 Hz, 3 H), 1.49-1.40 (m, 1 H). <sup>13</sup>C NMR (101 MHz, CDCl<sub>3</sub>) δ 173.50, 159.78, 146.68, 144.22, 141.20 (m, *J*<sub>F</sub> = 49.2 Hz), 138.62 (d, *J*<sub>F</sub> = 13.7 Hz), 136.05, 130.69, 129.02, 123.44, 120.64, 111.16 (m, *J*<sub>F</sub> = 35.2 Hz), 109.78, 79.55 (t, *J*<sub>F</sub> = 2.9 Hz), 51.57, 50.18, 36.71, 34.03, 31.64, 20.03. <sup>19</sup>F NMR (376 MHz, CDCl<sub>3</sub>) δ -139.98 (dd, *J* = 22.5, 8.0 Hz), -155.76 (t, *J* = 20.8 Hz), -162.36 (td, *J* = 22.3, 8.0 Hz). HRMS (EI) calculated for [C<sub>20</sub>H<sub>17</sub>F<sub>5</sub>O<sub>3</sub>]<sup>+</sup>: 400.1092 found: 400.1096. Enantiomeric excess was determined by HPLC with a Chiralpak OJH column (hexanes: 2-propanol = 95:5, 0.5 mL/min, 210 nm); minor enantiomer *tr* = 17.8 min, major enantiomer *tr* = 20.2 min. [ $\alpha$ ]<sub>D</sub><sup>20</sup> = 14.2 (*c* = 0.3, CHCl<sub>3</sub>).

7.9 Synthesis of (*R*)-3-(3-chloropropyl)-3-((perfluorophenyl)methyl)-2,3-dihydrobenzofuran (**3i**).

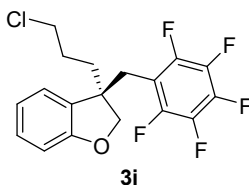

Prepared according to typical procedure from allyl ether **1i** (101.0 mg, 0.3 mmol), after a flash column chromatography (hexanes: Et<sub>2</sub>O = 100:1) afforded the product **3i** as a colorless liquid (101.0 mg, 87% yield) with 92% *ee*. <sup>1</sup>H NMR (400 MHz, CDCl<sub>3</sub>) δ 7.19-7.11 (m, 1 H), 6.99-6.95 (m, 1 H), 6.88 (td, *J* = 7.4, 1.0 Hz, 1 H), 6.75-6.72 (m, 1 H), 4.45 (d, *J* = 9.3 Hz, 1 H), 4.27 (d, *J* = 9.4 Hz, 1 H), 3.50 (t, *J* = 6.1 Hz, 2 H), 3.14-

3.02 (m, 2 H), 1.93–1.81 (m, 3 H), 1.64–1.55 (m, 1 H).  $^{13}\text{C}$  NMR (101 MHz,  $\text{CDCl}_3$ )  $\delta$  159.76, 146.65, 144.20, 141.26 (m,  $J_{\text{F}} = 49.2$  Hz), 138.58 (m,  $J_{\text{F}} = 79.7$  Hz), 136.07, 130.42, 129.11, 123.37, 120.74, 110.99 (m,  $J_{\text{F}} = 37.4$  Hz), 109.82, 79.46 (t,  $J_{\text{F}} = 2.9$  Hz), 49.91, 44.92, 34.73, 31.83, 27.77.  $^{19}\text{F}$  NMR (376 MHz,  $\text{CDCl}_3$ )  $\delta$  -139.84 (dd,  $J = 22.7, 8.0$  Hz), -155.51 (t,  $J = 20.9$  Hz), -162.07– -162.23 (m). HRMS (EI) calculated for  $[\text{C}_{18}\text{H}_{14}\text{ClF}_5\text{O}]^+$ : 376.0648 found: 376.0646. Enantiomeric excess was determined by HPLC with a Chiralpak ADH column (hexanes: 2-propanol = 99:1, 0.5 mL/min, 210 nm); minor enantiomer  $t_{\text{r}} = 13.6$  min, major enantiomer  $t_{\text{r}} = 15.4$  min.  $[\alpha]_{\text{D}}^{20} = 15.5$  ( $c = 0.5, \text{CHCl}_3$ ).

7.10 Synthesis of (*R*)-3-(4-chlorobutyl)-3-((perfluorophenyl)methyl)-2,3-dihydrobenzofuran (**3j**).

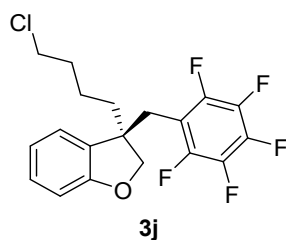

Prepared according to typical procedure from allyl ether **1j** (105.2 mg, 0.3 mmol), after a flash column chromatography (hexanes:  $\text{Et}_2\text{O} = 100:1$ ) afforded the product **3j** as a colorless liquid (83.3 mg, 71% yield) with 91% *ee*.  $^1\text{H}$  NMR (400 MHz,  $\text{CDCl}_3$ )  $\delta$  7.17–7.12 (m, 1 H), 6.94 (dd,  $J = 7.5, 1.6$  Hz, 1 H), 6.86 (t,  $J = 7.4$  Hz, 1 H), 6.73 (d,  $J = 8.0$  Hz, 1 H), 4.45 (d,  $J = 9.3$  Hz, 1 H), 4.28 (d,  $J = 9.2$  Hz, 1 H), 3.50 (td,  $J = 6.6, 2.0$  Hz, 2 H), 3.12–3.00 (m, 2 H), 1.80–1.72 (m, 4 H), 1.61–1.50 (m, 1 H), 1.38–1.22 (m, 1 H).  $^{13}\text{C}$  NMR (101 MHz,  $\text{CDCl}_3$ )  $\delta$  159.74, 146.65, 144.19, 141.19 (m,  $J_{\text{F}} = 49.2$  Hz), 138.67 (d,  $J_{\text{F}} = 13.2$  Hz), 136.04, 130.87, 128.99, 123.33, 120.63, 111.16 (m,  $J_{\text{F}} = 35.3$  Hz), 109.77, 79.66 (t,  $J_{\text{F}} = 2.8$  Hz), 50.19, 44.50, 36.60, 32.81, 31.61, 21.86.  $^{19}\text{F}$  NMR (376 MHz,  $\text{CDCl}_3$ )  $\delta$  -139.98 (dd,  $J = 22.8, 7.9$  Hz), -155.69 (t,  $J = 20.8$  Hz), -162.11 – -162.34 (m). HRMS (EI) calculated for  $[\text{C}_{19}\text{H}_{16}\text{ClF}_5\text{O}]^+$ : 390.0804 found: 390.0805. Enantiomeric excess was determined by HPLC with a Chiralpak OZ3 column (hexanes: 2-propanol = 99.5:0.5, 0.3 mL/min, 210 nm); minor enantiomer  $t_{\text{r}} = 28.5$  min, major enantiomer  $t_{\text{r}} = 30.1$  min.  $[\alpha]_{\text{D}}^{20} = 3.6$  ( $c = 0.5, \text{CHCl}_3$ ).

7.11 Synthesis of (*R*)-3-(5-fluoropentyl)-3-((perfluorophenyl)methyl)-2,3-dihydrobenzofuran (**3k**).

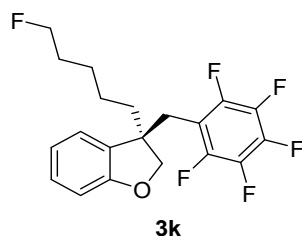

Prepared according to typical procedure from allyl ether **1k** (104.5 mg, 0.3 mmol), after a flash column chromatography (hexanes: Et<sub>2</sub>O = 100:1) afforded the product **3k** as a colorless liquid (72.0 mg, 62% yield) with 90% *ee*. <sup>1</sup>H NMR (400 MHz, CDCl<sub>3</sub>) δ 7.17-7.12 (m, 1 H), 6.94 (d, *J* = 7.3 Hz, 1 H), 6.89-6.84 (m, 1 H), 6.73 (dd, *J* = 8.1, 3.1 Hz, 1 H), 4.49-4.43 (m, 2 H), 4.35 (t, *J* = 6.0 Hz, 1 H), 4.27 (dd, *J* = 9.3, 2.9 Hz, 1 H), 3.11-2.99 (m, 2 H), 1.77-1.60 (m, 4 H), 1.46-1.39 (m, 3 H), 1.21-1.11 (m, 1 H). <sup>13</sup>C NMR (101 MHz, CDCl<sub>3</sub>) δ 159.76, 146.65, 144.22, 141.15 (m, *J*<sub>F</sub> = 49.2 Hz), 138.55 (m, *J*<sub>F</sub> = 79.7 Hz), 136.02, 131.09, 128.89, 123.36, 120.58, 111.27 (m, *J*<sub>F</sub> = 35.4 Hz), 109.70, 83.90 (d, *J*<sub>F</sub> = 164.3 Hz), 79.73 (t, *J*<sub>F</sub> = 2.8 Hz), 50.23, 37.31, 31.70, 30.19 (d, *J*<sub>F</sub> = 19.6 Hz), 25.75 (d, *J*<sub>F</sub> = 5.1 Hz), 24.15. <sup>19</sup>F NMR (376 MHz, CDCl<sub>3</sub>) δ -140.01 (dd, *J* = 24.6, 8.2 Hz), -155.90 (t, *J* = 21.1 Hz), -162.43 (td, *J* = 23.5, 6.5 Hz), -218.42 (dd, *J* = 48.3, 23.9 Hz). HRMS (EI) calculated for [C<sub>20</sub>H<sub>18</sub>F<sub>6</sub>O]<sup>+</sup>: 388.1256 found: 388.1254. Enantiomeric excess was determined by HPLC with a Chiralpak OZ3 column (hexanes: 2-propanol = 99.5:0.5, 0.3 mL/min, 210 nm); minor enantiomer *tr* = 27.5 min, major enantiomer *tr* = 28.8 min. [ $\alpha$ ]<sub>D</sub><sup>20</sup> = 5.3 (*c* = 0.5, CHCl<sub>3</sub>).

7.12 Synthesis of (*R*)-3-(3-(4-chloro-3,5-dimethylphenoxy)propyl)-3-((perfluorophenyl)methyl)-2,3-dihydrobenzofuran (**3l**).

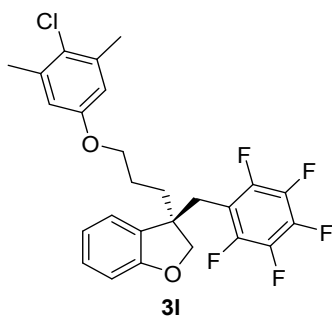

Prepared according to typical procedure from allyl ether **11** (137.0 mg, 0.3 mmol), after a flash column chromatography (hexanes: Et<sub>2</sub>O = 10:1) afforded the product **31** as a yellow liquid (152.8 mg, 84% yield) with 90% *ee*. <sup>1</sup>H NMR (400 MHz, CDCl<sub>3</sub>) δ 7.19–7.14 (m, 1 H), 7.00–6.97 (m, 1 H), 6.91–6.86 (m, 1 H), 6.76 (dd, *J* = 8.2, 3.5 Hz, 1 H), 6.60 (d, *J* = 3.4 Hz, 2 H), 4.48 (dd, *J* = 9.4, 3.6 Hz, 1 H), 4.33 (dd, *J* = 9.5, 3.4 Hz, 1 H), 3.89–3.86 (m, 2 H), 3.17–3.04 (m, 2 H), 2.34 (s, 6 H), 1.94–1.83 (m, 3 H), 1.64–1.57 (m, 1 H). <sup>13</sup>C NMR (101 MHz, CDCl<sub>3</sub>) δ 159.80, 156.60, 146.64, 144.22, 141.15 (m, *J*<sub>F</sub> = 49.2 Hz), 138.54 (m, *J*<sub>F</sub> = 79.7 Hz), 137.06, 136.04, 130.71, 129.02, 126.22, 123.40, 120.66, 114.40, 111.12 (d, *J*<sub>F</sub> = 3.5 Hz), 109.78, 79.60 (t, *J*<sub>F</sub> = 2.9 Hz), 67.77, 50.04, 33.75, 31.71, 24.60, 20.86. <sup>19</sup>F NMR (376 MHz, CDCl<sub>3</sub>) δ -139.82 (dd, *J* = 23.4, 8.2 Hz), -155.66 (dd, *J* = 23.7, 18.2 Hz), -162.24 (td, *J* = 22.2, 8.0 Hz). HRMS (EI) calculated for [C<sub>26</sub>H<sub>22</sub>ClF<sub>5</sub>O<sub>2</sub>]<sup>+</sup>: 496.1223 found: 496.1224. Enantiomeric excess was determined by HPLC with a Chiralpak OZ3 column (hexanes: 2-propanol = 99:1, 0.3 mL/min, 210 nm); major enantiomer *tr* = 19.1 min, minor enantiomer *tr* = 25.4 min. [α]<sub>D</sub><sup>20</sup> = 16.0 (*c* = 0.5, CHCl<sub>3</sub>).

### 7.13 Synthesis of (*R*)-3-(4-(naphthalen-1-ylthio)butyl)-3-(perfluorophenyl)methyl-2,3-dihydrobenzofuran (**3m**).

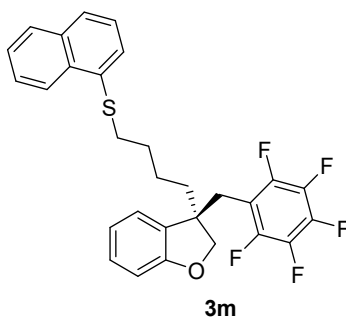

Prepared according to typical procedure from allyl ether **1m** (142.3 mg, 0.3 mmol), after a flash column chromatography (hexanes: Et<sub>2</sub>O = 50:1) afforded the product **3m** as a blue liquid (133.8 mg, 87% yield) with 91% *ee*. <sup>1</sup>H NMR (400 MHz, CDCl<sub>3</sub>) δ 7.79–7.70 (m, 4 H), 7.52–7.38 (m, 3 H), 7.14 (td, *J* = 7.7, 1.5 Hz, 1 H), 6.92 (d, *J* = 6.6 Hz, 1 H), 6.85 (td, *J* = 7.4, 1.0 Hz, 1 H), 6.72 (d, *J* = 8.0 Hz, 1 H), 4.43 (d, *J* = 9.2 Hz, 1 H), 4.26 (d, *J* = 9.2 Hz, 1 H), 3.09–2.93 (m, 4 H), 1.75–1.64 (m, 4 H), 1.56–1.52 (m, 1 H), 1.34–1.24 (m, 1 H). <sup>13</sup>C NMR (101 MHz, CDCl<sub>3</sub>) δ 159.81, 146.68, 144.23, 141.19 (m, *J*<sub>F</sub> = 49.2 Hz), 138.57 (m, *J*<sub>F</sub> = 79.7 Hz), 136.07, 134.10, 133.81, 131.76, 131.01, 128.96, 128.37, 127.72, 127.39, 127.01, 126.89, 126.56, 125.63, 123.40, 120.62, 111.26 (t, *J*<sub>F</sub> = 18.3 Hz), 109.76, 79.72, 50.24, 36.96, 33.33, 31.67, 29.56, 23.74. <sup>19</sup>F NMR (376 MHz, CDCl<sub>3</sub>) δ -139.91 (dt, *J* = 22.4, 6.9 Hz), -155.74 (t, *J* = 20.9 Hz), -162.28 (td, *J* = 22.1, 7.9 Hz). HRMS (EI) calculated for [C<sub>29</sub>H<sub>23</sub>F<sub>5</sub>OS]<sup>+</sup>: 514.1384 found: 514.1390. Enantiomeric excess was determined by HPLC with a Chiralpak IG column (hexanes: 2-propanol = 95:5, 0.5 mL/min, 254 nm); minor enantiomer *tr* = 14.4 min, major enantiomer *tr* = 15.4 min. [α]<sub>D</sub><sup>20</sup> = 7.3 (*c* = 0.5, CHCl<sub>3</sub>).

7.14 Synthesis of (*R*)-3-((perfluorophenyl)methyl)-3-(3-(*p*-tolylthio)propyl)-2,3-dihydrobenzofuran (**3n**).

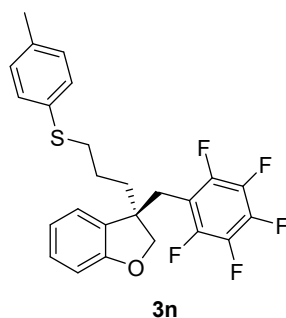

Prepared according to typical procedure from allyl ether **1n** (127.3 mg, 0.3 mmol), after a flash column chromatography (hexanes: Et<sub>2</sub>O = 50:1) afforded the product **3n** as a colorless liquid (116.5 mg, 84% yield) with 93% *ee*. <sup>1</sup>H NMR (400 MHz, CDCl<sub>3</sub>) δ 7.21–7.18 (m, 2 H), 7.16–7.11 (m, 1 H), 7.09–7.07 (m, 2 H), 6.92 (dd, *J* = 7.4, 1.4 Hz, 1 H), 6.85 (td, *J* = 7.4, 1.0 Hz, 1 H), 6.71 (dd, *J* = 8.0, 0.9 Hz, 1 H), 4.41 (d, *J* = 9.3 Hz, 1 H), 4.22 (d, *J* = 9.3 Hz, 1 H), 3.10–2.98 (m, 2 H), 2.93–2.78 (m, 2 H), 2.32 (s, 3 H),

1.97–1.81 (m, 2 H), 1.76–1.65 (m, 1 H), 1.50–1.39 (m, 1 H).  $^{13}\text{C}$  NMR (101 MHz,  $\text{CDCl}_3$ )  $\delta$  159.75, 146.66, 144.20, 141.18 (m,  $J_{\text{F}} = 49.2$  Hz), 138.70 (m,  $J_{\text{F}} = 79.7$  Hz), 136.30, 136.06, 132.35, 130.75, 130.16, 129.71, 129.00, 123.44, 120.67, 111.18 (m,  $J_{\text{F}} = 35.2$  Hz), 109.76, 79.60 (t,  $J_{\text{F}} = 2.9$  Hz), 50.16, 36.25, 34.79, 31.80, 24.26, 20.99.  $^{19}\text{F}$  NMR (376 MHz,  $\text{CDCl}_3$ )  $\delta$  -139.87 (dd,  $J = 23.2, 8.2$  Hz), -155.72 (t,  $J = 20.9$  Hz), -162.27 (td,  $J = 22.3, 8.0$  Hz). HRMS (EI) calculated for  $[\text{C}_{25}\text{H}_{21}\text{F}_5\text{OS}]^+$ : 464.1228 found: 464.1231. Enantiomeric excess was determined by HPLC with a Chiralpak OZ3 column (hexanes: 2-propanol = 80:20, 0.5 mL/min, 254 nm); major enantiomer  $t_{\text{r}} = 8.4$  min, minor enantiomer  $t_{\text{r}} = 9.1$  min.  $[\alpha]_{\text{D}}^{20} = 2.4$  ( $c = 0.5$ ,  $\text{CHCl}_3$ ).

7.15 Synthesis of (*R*)-3-(4-(3-((perfluorophenyl)methyl)-2,3-dihydrobenzofuran-3-yl)butyl)oxazolidin-2-one (**30**).

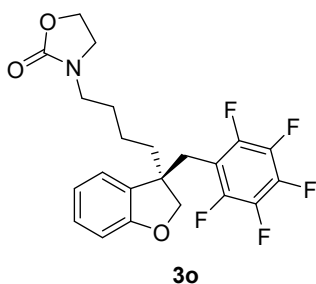

Prepared according to typical procedure from allyl ether **10** (120.3 mg, 0.3 mmol), after a flash column chromatography (hexanes:  $\text{Et}_2\text{O} = 10:1$ ) afforded the product **30** as a colorless liquid (115.1 mg, 87% yield) with 90% *ee*.  $^1\text{H}$  NMR (400 MHz,  $\text{CDCl}_3$ )  $\delta$  7.12 (t,  $J = 7.7$  Hz, 1 H), 6.92 (d,  $J = 7.4$  Hz, 1 H), 6.84 (t,  $J = 7.4$  Hz, 1 H), 6.70 (d,  $J = 8.0$  Hz, 1 H), 4.41 (d,  $J = 9.3$  Hz, 1 H), 4.28–4.23 (m, 3H), 3.52–3.45 (m, 2 H), 3.21 (t,  $J = 7.2$  Hz, 2 H), 3.04 (q,  $J = 13.9$  Hz, 2 H), 1.79–1.72 (m, 2 H), 1.57–1.49 (m, 2 H), 1.45–1.34 (m, 1 H), 1.19–1.06 (m, 1 H).  $^{13}\text{C}$  NMR (101 MHz,  $\text{CDCl}_3$ )  $\delta$  159.67, 158.38, 146.55, 144.11 (m,  $J_{\text{F}} = 49.2$  Hz), 141.06, 138.44 (m,  $J_{\text{F}} = 79.7$  Hz), 135.94, 130.79, 128.83, 123.31, 120.50, 111.37–110.90 (m,  $J_{\text{F}} = 53.6$  Hz), 109.59, 79.54 (d,  $J_{\text{F}} = 3.0$  Hz), 61.54, 50.09, 44.33, 43.66, 36.73, 31.51, 27.52, 21.33.  $^{19}\text{F}$  NMR (376 MHz,  $\text{CDCl}_3$ )  $\delta$  -139.98 (dd,  $J = 23.2, 8.0$  Hz), -155.88 (t,  $J = 20.9$  Hz), -162.42 (td,  $J = 22.2, 7.8$  Hz). HRMS (ESI) calculated for  $[\text{M}+\text{H}]^+ = [\text{C}_{22}\text{H}_{21}\text{F}_5\text{NO}_3]^+$ : 442.1437 found: 442.1442. Enantiomeric excess was determined by HPLC with a Chiralpak OJH

column (hexanes: 2-propanol = 60:40, 0.5 mL/min, 210 nm); minor enantiomer  $t_r$  = 17.7 min, major enantiomer  $t_r$  = 19.2 min.  $[\alpha]_D^{20} = 7.1$  ( $c = 0.5$ ,  $\text{CHCl}_3$ ).

7.16 Synthesis of (*R*)-1-(4-(3-((perfluorophenyl)methyl)-2,3-dihydrobenzofuran-3-yl)butyl)pyrrolidine-2,5-dione (**3p**).

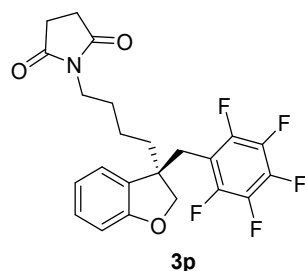

Prepared according to typical procedure from allyl ether **1p** (124.0 mg, 0.3 mmol), after a flash column chromatography (hexanes:  $\text{Et}_2\text{O}$  = 10:1) afforded the product **3p** as a colorless liquid (112.0 mg, 85% yield) with 91% *ee*.  $^1\text{H}$  NMR (400 MHz,  $\text{CDCl}_3$ )  $\delta$  7.14-7.10 (m, 1 H), 6.94-6.92 (m, 1 H), 6.85 (td,  $J = 7.4, 1.0$  Hz, 1 H), 6.71 (dt,  $J = 8.0, 0.7$  Hz, 1 H), 4.41 (d,  $J = 9.2$  Hz, 1 H), 4.24 (d,  $J = 9.3$  Hz, 1 H), 3.47-3.43 (m, 2 H), 3.09-2.98 (m, 2 H), 2.66 (s, 4 H), 1.78-1.70 (m, 2 H), 1.59 -1.52 (m, 2 H), 1.41-1.30 (m, 1 H), 1.14-1.01 (m, 1 H).  $^{13}\text{C}$  NMR (101 MHz,  $\text{CDCl}_3$ )  $\delta$  177.11, 159.72, 146.60, 144.15, 141.11 (m,  $J_{\text{F}} = 49.2$  Hz), 138.47 (m,  $J_{\text{F}} = 79.7$  Hz), 135.92 (d,  $J_{\text{F}} = 14.3$  Hz), 130.76, 128.88, 123.37, 120.52, 111.97 – 110.88 (m,  $J_{\text{F}} = 109.2$  Hz), 109.64, 79.54 (t,  $J_{\text{F}} = 2.7$  Hz), 60.31, 50.12, 38.23, 36.75, 31.62, 27.98 (d,  $J_{\text{F}} = 13.1$  Hz), 21.59.  $^{19}\text{F}$  NMR (376 MHz,  $\text{CDCl}_3$ )  $\delta$  -139.96 (dd,  $J = 22.8, 8.0$  Hz), -155.81 (t,  $J = 21.0$  Hz), -162.27 – -162.42 (m). HRMS (ESI) calculated for  $[\text{M}+\text{H}]^+ = [\text{C}_{23}\text{H}_{21}\text{F}_5\text{NO}_3]^+$ : 454.1437 found: 454.1442. Enantiomeric excess was determined by HPLC with a Chiralpak ODH column (hexanes: 2-propanol = 60:40, 0.5 mL/min, 210 nm); minor enantiomer  $t_r$  = 26.8 min, major enantiomer  $t_r$  = 29.7 min.  $[\alpha]_D^{20} = 6.2$  ( $c = 0.4$ ,  $\text{CHCl}_3$ ).

7.17 Synthesis of (*R*)-2-(3-(3-((perfluorophenyl)methyl)-2,3-dihydrobenzofuran-3-yl)propyl)isoindoline-1,3-dione (**3q**).



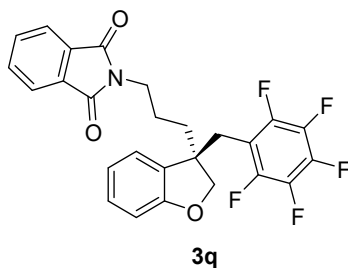

Prepared according to typical procedure from allyl ether **1q** (134.2 mg, 0.3 mmol), after a flash column chromatography (hexanes: Et<sub>2</sub>O = 10:1) afforded the product **3q** as a white solid (112.3 mg, 77% yield) with 90% *ee*. <sup>1</sup>H NMR (400 MHz, CDCl<sub>3</sub>) δ 7.85–7.78(m, 2 H), 7.73–7.69 (m, 2 H), 7.11 (td, *J* = 7.7, 1.4 Hz, 1 H), 6.93 (d, *J* = 7.4 Hz, 1 H), 6.83 (td, *J* = 7.4, 1.0 Hz, 1 H), 6.70 (s, 1 H), 4.41 (d, *J* = 9.3 Hz, 1 H), 4.24 (d, *J* = 9.3 Hz, 1 H), 3.72–3.63 (m, 2 H), 3.10–2.98 (m, 2 H), 1.84–1.72 (m, 3 H), 1.57–1.47 (m, 1 H). <sup>13</sup>C NMR (101 MHz, CDCl<sub>3</sub>) δ 168.31, 159.71, 146.65, 144.20, 141.22 (m, *J*<sub>F</sub> = 49.2 Hz), 138.56 (m, *J*<sub>F</sub> = 79.7 Hz), 136.04, 133.99, 132.02, 130.55, 129.07, 123.43, 123.34, 120.74, 111.05 (m, *J*<sub>F</sub> = 36.3 Hz), 109.81, 79.64(t, *J*<sub>F</sub> = 2.9 Hz), 49.95, 37.99, 34.46, 31.55, 23.88. <sup>19</sup>F NMR (376 MHz, CDCl<sub>3</sub>) δ -139.90 (dd, *J* = 23.3, 8.2 Hz), -155.64 (t, *J* = 20.8 Hz), -162.25 (td, *J* = 22.2, 8.1 Hz). HRMS (EI) calculated for [C<sub>26</sub>H<sub>18</sub>F<sub>5</sub>NO<sub>3</sub>]<sup>+</sup>: 487.1201 found: 487.1204. Enantiomeric excess was determined by HPLC with a Chiralpak OZ3 column (hexanes: 2-propanol = 80:20, 0.5 mL/min, 210 nm); major enantiomer *tr* = 18.7 min, minor enantiomer *tr* = 20.7 min. [*α*]<sub>D</sub><sup>20</sup> = 6.1 (*c* = 0.5, CHCl<sub>3</sub>).

7.18 Synthesis of (*R*)-1-(4-(3-((perfluorophenyl)methyl)-2,3-dihydrobenzofuran-3-yl)butyl)benzo[*cd*]indol-2(1H)-one (**3r**).

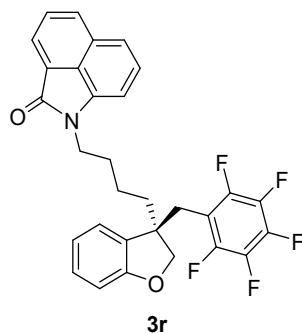

Prepared according to typical procedure from allyl ether **1r** (145.0 mg, 0.3 mmol), after

a flash column chromatography (hexanes: Et<sub>2</sub>O = 10:1) afforded the product **3r** as a light yellow liquid (136.6 mg, 87% yield) with 92% *ee*. <sup>1</sup>H NMR (400 MHz, CDCl<sub>3</sub>) δ 8.02 (dd, *J* = 19.7, 7.5 Hz, 2 H), 7.70 (dd, *J* = 8.1, 7.0 Hz, 1 H), 7.52 (d, *J* = 8.4 Hz, 1 H), 7.43 (dd, *J* = 8.5, 7.0 Hz, 1 H), 7.10 (td, *J* = 7.7, 1.4 Hz, 1 H), 6.93 (dd, *J* = 7.5, 1.3 Hz, 1 H), 6.85–6.77 (m, 2 H), 6.69 (d, *J* = 8.0 Hz, 1 H), 4.40 (d, *J* = 9.3 Hz, 1 H), 4.25 (d, *J* = 9.3 Hz, 1 H), 3.88 (t, *J* = 7.2 Hz, 2 H), 3.06 (dt, *J* = 13.8, 1.8 Hz, 2 H), 1.86–1.71 (m, 4 H), 1.56–1.44 (m, 1 H), 1.34–1.17 (m, 1 H). <sup>13</sup>C NMR (101 MHz, CDCl<sub>3</sub>) δ 167.99, 159.77, 146.64, 144.20, 141.16 (m, *J<sub>F</sub>* = 49.2 Hz), 139.34, 138.57 (m, *J<sub>F</sub>* = 79.7 Hz), 136.02, 130.90, 130.77, 129.13, 128.91, 128.68, 128.44, 126.63, 125.15, 124.24, 123.44, 120.59, 120.24, 111.24 (t, *J<sub>F</sub>* = 18.2 Hz), 109.69, 104.87, 79.64 (t, *J<sub>F</sub>* = 2.8 Hz), 50.22, 39.81, 37.07, 31.69, 29.09, 21.84. <sup>19</sup>F NMR (376 MHz, CDCl<sub>3</sub>) δ -139.89 (dd, *J* = 23.7, 8.0 Hz), -155.81 (t, *J* = 20.9 Hz), -162.26 – -162.41 (m, *J* = 27.1, 16.1, 6.1 Hz). HRMS (EI) calculated for [C<sub>30</sub>H<sub>22</sub>F<sub>5</sub>NO<sub>2</sub>]<sup>+</sup>: 523.1565 found: 523.1567. Enantiomeric excess was determined by HPLC with a Chiralpak ODH column (hexanes: 2-propanol = 80:20, 0.5 mL/min, 254 nm); minor enantiomer *tr* = 20.5 min, major enantiomer *tr* = 22.0 min. [α]<sub>D</sub><sup>20</sup> = 11.6 (*c* = 0.5, CHCl<sub>3</sub>).

7.19 Synthesis of (3*R*)-3-(3-(((4*R*,6*S*)-6-(2,2-dimethyl-1,3-dioxolan-4-yl)-2,2-dimethyltetrahydrofuro[3,4-*d*][1,3]dioxol-4-yl)oxy)propyl)-3-((perfluorophenyl)methyl)-2,3-dihydrobenzofura (**3s**).

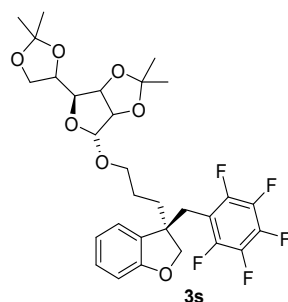

Prepared according to typical procedure from allyl ether **1s** (168.0 mg, 0.3 mmol), after a flash column chromatography (hexanes: Et<sub>2</sub>O = 50:1) afforded the product **4s** as a colorless liquid (118.1 mg, 81% yield) with 18:1 dr. <sup>1</sup>H NMR (400 MHz, CDCl<sub>3</sub>) δ 7.15–7.09 (m, 1 H), 6.95 (d, *J* = 7.4 Hz, 1 H), 6.87–6.83 (m, 1 H), 6.71 (d, *J* = 8.0 Hz,

1 H), 4.92 (s, 1 H), 4.76 (dd,  $J = 5.9, 3.6$  Hz, 1 H), 4.54 (d,  $J = 5.9$  Hz, 1 H), 4.44–4.33 (m, 2 H), 4.26 (d,  $J = 9.3$  Hz, 1 H), 4.09 (dd,  $J = 8.7, 6.3$  Hz, 1 H), 4.00 (dd,  $J = 8.7, 4.5$  Hz, 1 H), 3.88 (dd,  $J = 7.6, 3.6$  Hz, 1 H), 3.58 (dt,  $J = 9.8, 6.3$  Hz, 1 H), 3.33 (dt,  $J = 9.7, 6.3$  Hz, 1 H), 3.11–2.99 (m, 2 H), 1.76 (q,  $J = 7.9$  Hz, 2 H), 1.69–1.60 (m, 2 H), 1.45 (d,  $J = 3.4$  Hz, 6 H), 1.37 (s, 3 H), 1.31 (s, 3 H).  $^{13}\text{C}$  NMR (101 MHz,  $\text{CDCl}_3$ )  $\delta$  159.74, 146.63, 144.19, 141.18 (m,  $J_{\text{F}} = 49.2$  Hz), 138.60 (m,  $J_{\text{F}} = 79.7$  Hz), 136.02, 130.76, 128.95, 123.39, 120.61, 112.58, 111.16 (t,  $J = 19.0$  Hz), 109.73, 109.17, 106.26, 84.99, 80.27, 79.61, 79.49 (d,  $J = 4.1$  Hz), 73.10, 67.21, 66.86, 49.98, 33.98, 31.58, 26.84, 25.83, 25.12, 24.65, 24.46.  $^{19}\text{F}$  NMR (376 MHz,  $\text{CDCl}_3$ )  $\delta$  -139.89 (dd,  $J = 23.3, 8.2$  Hz), -155.72 (t,  $J = 20.8$  Hz), -162.31 (td,  $J = 22.0, 7.9$  Hz). HRMS (ESI) calculated for  $[\text{M}+\text{H}]^+ = [\text{C}_{30}\text{H}_{34}\text{F}_5\text{O}_7]^+$ : 601.2220 found: 601.2225.  $[\alpha]_{\text{D}}^{20} = 46.7$  ( $c = 0.3, \text{CHCl}_3$ ).

7.20 Synthesis of (*R*)-3-(3-((*R*)-3-((perfluorophenyl)methyl)-2,3-dihydrobenzofuran-3-yl)propyl)-4-phenyloxazolidin-2-one (**3t**).

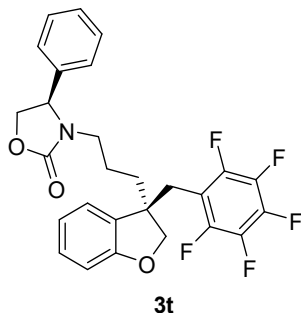

Prepared according to typical procedure from allyl ether **1t** (139.0 mg, 0.3 mmol), after a flash column chromatography (hexanes:  $\text{Et}_2\text{O} = 2:1$ ) afforded the product **4t** as a white solid (124.7 mg, 83% yield) with  $>20:1$  dr. Mp: 161–162 °C.  $^1\text{H}$  NMR (400 MHz,  $\text{CDCl}_3$ )  $\delta$  7.39 (dd,  $J = 5.2, 1.9$  Hz, 3 H), 7.20 (dd,  $J = 6.8, 2.7$  Hz, 2 H), 7.16–7.11 (m, 1 H), 6.85 (d,  $J = 6.7$  Hz, 2 H), 6.71 (d,  $J = 8.0$  Hz, 1 H), 4.64–4.54 (m, 2 H), 4.37 (d,  $J = 9.2$  Hz, 1 H), 4.16 (d,  $J = 9.3$  Hz, 1 H), 4.10 (dd,  $J = 8.2, 6.3$  Hz, 1 H), 3.39–3.32 (m, 1 H), 3.00 (q,  $J = 13.9$  Hz, 2 H), 2.78–2.71 (m, 1 H), 1.71–1.56 (m, 2 H), 1.52–1.44 (m, 1 H), 1.33–1.21 (m, 1 H).  $^{13}\text{C}$  NMR (101 MHz,  $\text{CDCl}_3$ )  $\delta$  159.70, 158.18, 146.57, 144.14, 141.16 (m,  $J_{\text{F}} = 49.2$  Hz), 138.61 (d,  $J_{\text{F}} = 15.1$  Hz), 137.61, 136.02, 130.41, 129.29, 129.15, 129.01, 127.02, 123.34, 120.63, 110.94, 109.75, 79.44 (t,  $J_{\text{F}} = 2.8$  Hz),

69.72, 59.89, 49.97, 42.38, 34.37, 31.49, 22.22.  $^{19}\text{F}$  NMR (376 MHz,  $\text{CDCl}_3$ )  $\delta$  -139.88 (dd,  $J = 23.0, 8.1$  Hz), -155.49 (t,  $J = 21.0$  Hz), -162.10 (td,  $J = 22.4, 7.9$  Hz). HRMS (ESI) calculated for  $[\text{M}+\text{H}]^+ = [\text{C}_{27}\text{H}_{23}\text{F}_5\text{NO}_3]^+$ : 504.1593 found: 504.1598.  $[\alpha]_{\text{D}}^{20} = 44.637$  ( $c = 0.5$ ,  $\text{CHCl}_3$ ).

7.21 Synthesis of (*S*)-2,5,7,8-tetramethyl-6-(3-((*R*)-3-((perfluorophenyl)methyl)-2,3-dihydrobenzofuran-3-yl)propoxy)-2-((4*S*,8*S*)-4,8,12-trimethyltridecyl)chromane (**3u**).

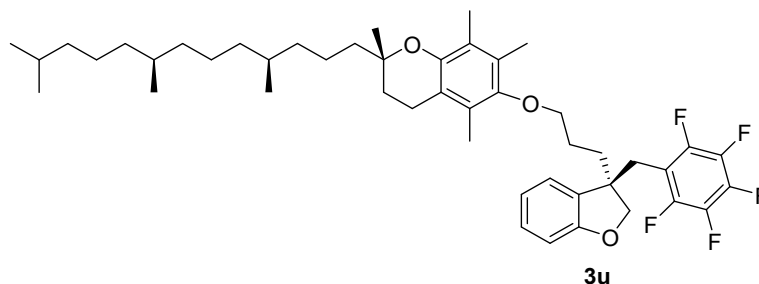

Prepared according to typical procedure from allyl ether **1v** (219.3 mg, 0.3 mmol), after a flash column chromatography (hexanes:  $\text{Et}_2\text{O} = 40:1$ ) afforded the product **3u** as a yellow liquid (184.1 mg, 80% yield) with  $>20:1$  dr.  $^1\text{H}$  NMR (400 MHz,  $\text{CDCl}_3$ )  $\delta$  7.18 (td,  $J = 7.7, 1.4$  Hz, 1 H), 7.05 (d,  $J = 7.4$  Hz, 1 H), 6.91 (t,  $J = 7.4$  Hz, 1 H), 6.78 (d,  $J = 8.0$  Hz, 1 H), 4.52 (d,  $J = 9.3$  Hz, 1 H), 4.39 (d,  $J = 9.3$  Hz, 1 H), 3.62 (q,  $J = 5.8$  Hz, 2 H), 3.21–3.08 (m, 2 H), 2.59 (t,  $J = 6.8$  Hz, 2 H), 2.15 (s, 3 H), 2.10 (s, 6 H), 2.06–2.02 (m, 2 H), 1.94–1.72 (m, 3 H), 1.64–1.50 (m, 5 H), 1.44–1.28 (m, 11 H), 1.22–1.05 (m, 8 H), 0.98–0.87 (m, 13 H).  $^{13}\text{C}$  NMR (101 MHz,  $\text{CDCl}_3$ )  $\delta$  159.89, 147.99, 147.77, 146.69, 144.25, 141.22 (m,  $J_{\text{F}} = 49.2$  Hz), 138.63 (m,  $J_{\text{F}} = 79.7$  Hz), 136.09, 130.89, 128.94, 127.67, 125.65, 123.45, 122.86, 120.66, 117.51, 111.29 (m,  $J_{\text{F}} = 35.2$  Hz), 109.74, 79.61 (t,  $J_{\text{F}} = 2.9$  Hz), 74.75, 72.47, 50.16, 40.03, 39.37, 37.47, 37.45, 37.41, 37.28, 34.11, 32.79, 32.69, 32.11, 31.29, 27.97, 25.53, 24.79, 24.43, 23.84, 22.70, 22.61, 21.01, 20.63, 19.73, 19.64, 12.60, 11.74.  $^{19}\text{F}$  NMR (376 MHz,  $\text{CDCl}_3$ )  $\delta$  -139.73 (dd,  $J = 22.9, 8.1$  Hz), -155.76 (t,  $J = 21.0$  Hz), -162.32 (td,  $J = 22.4, 7.9$  Hz). HRMS (ESI) calculated for  $[\text{M}+\text{H}]^+ = [\text{C}_{47}\text{H}_{64}\text{F}_5\text{O}_3]^+$ : 771.4770 found: 771.4791.  $[\alpha]_{\text{D}}^{20} = 15.719$  ( $c = 0.5$ ,  $\text{CHCl}_3$ ).

7.22 Synthesis of (*S*)-5-chloro-3'-methyl-2H-spiro[benzofuran-3,7'-bicyclo[4.2.0]octane]-1'(6'),2',4'-triene (**5a**).

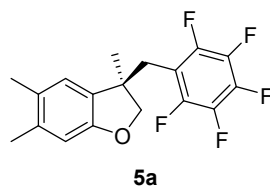

Prepared according to typical procedure from allyl ether **4a** (90.7 mg, 0.3 mmol), after a flash column chromatography (hexanes: Et<sub>2</sub>O = 100:1) afforded the product **5a** as a colorless liquid (71.7 mg, 70% yield) with 93% *ee*. <sup>1</sup>H NMR (400 MHz, CDCl<sub>3</sub>) δ 6.77 (s, 1 H), 6.59 (s, 1 H), 4.44 (d, J = 8.9 Hz, 1 H), 4.05 (d, J = 8.9 Hz, 1 H), 3.06 – 2.91 (m, 2 H), 2.22 (s, 3 H), 2.19 (s, 3 H), 1.36 (d, J = 1.6 Hz, 3 H). <sup>13</sup>C NMR (101 MHz, CDCl<sub>3</sub>) δ 157.57, 146.66, 144.19, 138.62, 137.12, 136.10, 130.55, 128.59, 123.58, 111.66(m, J<sub>F</sub> = 36.3 Hz), 111.00, 107.14, 82.14 (t, J<sub>F</sub> = 2.8 Hz), 46.64, 32.68, 23.90, 20.14, 19.28. <sup>19</sup>F NMR (376 MHz, CDCl<sub>3</sub>) δ -140.24 (dd, J = 23.0, 8.4 Hz), -156.09 (t, J = 20.8 Hz), -162.45 (td, J = 22.2, 8.0 Hz). HRMS (EI) calculated for [C<sub>18</sub>H<sub>15</sub>F<sub>5</sub>O]<sup>+</sup>: 342.1038 found: 342.1037. Enantiomeric excess was determined by HPLC with a Chiralpak OZ3 column (hexanes = 100, 1.0 mL/min, 210 nm); minor enantiomer tr = 20.5 min, major enantiomer tr = 31.1 min. [α]<sub>D</sub><sup>20</sup> = -23.4 (c = 0.3, CHCl<sub>3</sub>).

7.23 Synthesis of (*R*)-5-fluoro-3-methyl-3-((perfluorophenyl)methyl)-2,3-dihydrobenzofuran (**5b**).

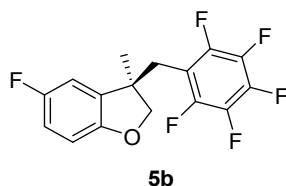

Prepared according to typical procedure from allyl ether **4b** (87.6 mg, 0.3 mmol), after a flash column chromatography (hexanes: Et<sub>2</sub>O = 100:1) afforded the product **5b** as a white solid (58.6 mg, 60% yield) with 87% *ee*. Mp: 80-82 °C. <sup>1</sup>H NMR (400 MHz, CDCl<sub>3</sub>) δ 6.83 (td, J = 8.8, 2.7 Hz, 1 H), 6.72-6.65 (m, 2 H), 4.50 (d, J = 9.0 Hz, 1 H), 4.13 (d, J = 9.0 Hz, 1 H), 3.05-2.95 (m, 2 H), 1.40 (t, J = 1.2 Hz, 3 H). <sup>13</sup>C NMR (101 MHz, CDCl<sub>3</sub>) δ 158.84, 156.48, 155.22, 146.58 (d, J<sub>F</sub> = 10.5 Hz), 144.13 (d, J<sub>F</sub> = 9.2

Hz), 141.31, 138.72 (d,  $J_F = 15.0$  Hz), 136.05 (d,  $J_F = 16.3$  Hz), 134.56 (d,  $J_F = 7.7$  Hz), 115.03 (d,  $J_F = 24.1$  Hz), 111.03 (t,  $J_F = 17.1$  Hz), 110.24-109.91 (m,  $J_F = 33.1$  Hz), 82.59 (t,  $J_F = 2.5$  Hz), 47.04, 32.62, 23.61.  $^{19}\text{F}$  NMR (376 MHz,  $\text{CDCl}_3$ )  $\delta$  -123.49 (d,  $J = 8.2$  Hz), -140.42 (dd,  $J = 23.1, 8.3$  Hz), -155.48 (t,  $J = 21.1$  Hz), -162.03 – -162.17 (m). HRMS (EI) calculated for  $[\text{C}_{16}\text{H}_{10}\text{F}_6\text{O}]^+$ : 332.0630 found: 332.0628. Enantiomeric excess was determined by HPLC with a Chiralpak IA column (hexanes = 100, 1.0 mL/min, 210 nm); major enantiomer  $t_r = 15.7$  min, minor enantiomer  $t_r = 22.4$  min.  $[\alpha]_D^{20} = -15.5$  ( $c = 0.5$ ,  $\text{CHCl}_3$ ).

#### 7.24 Synthesis of methyl (*R*)-3-methyl-3-((perfluorophenyl)methyl)-2,3-dihydronaphtho[2,3-*b*]furan (**5c**).

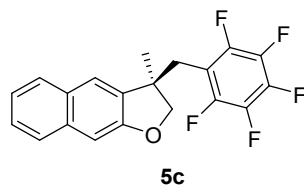

Prepared according to typical procedure from allyl ether **4c** (97.3 mg, 0.3 mmol), after a flash column chromatography (hexanes:  $\text{Et}_2\text{O} = 100:1$ ) afforded the product **5c** as a white solid (86.1 mg, 79% yield) with 90% *ee*. Mp: 151-152 °C.  $^1\text{H}$  NMR (400 MHz,  $\text{CDCl}_3$ )  $\delta$  7.74-7.69 (m, 2 H), 7.45-7.39 (m, 2 H), 7.32 (t,  $J = 7.6$  Hz, 1 H), 7.11 (s, 1 H), 4.56 (d,  $J = 8.9$  Hz, 1 H), 4.18 (d,  $J = 8.9$  Hz, 1 H), 3.11 (q,  $J = 13.8$  Hz, 2 H), 1.48 (s, 3 H).  $^{13}\text{C}$  NMR (101 MHz,  $\text{CDCl}_3$ )  $\delta$  157.88, 146.75, 144.20, 141.28, 138.65, 136.00, 136.16, 134.65, 129.55, 127.78, 126.85, 126.10, 123.49, 121.81, 111.12 (m,  $J_F = 33.6$  Hz), 104.47, 82.21 (t,  $J_F = 2.8$  Hz), 46.27, 32.72, 23.71.  $^{19}\text{F}$  NMR (376 MHz,  $\text{CDCl}_3$ )  $\delta$  -140.14 (dd,  $J = 22.6, 8.3$  Hz), -155.53 (t,  $J = 20.9$  Hz), -162.03 (td,  $J = 22.4, 8.0$  Hz). HRMS (EI) calculated for  $[\text{C}_{20}\text{H}_{13}\text{F}_5\text{O}]^+$ : 364.0881 found: 364.0876. Enantiomeric excess was determined by HPLC with a Chiralpak IB column (hexanes: 2-propanol = 99:1, 1.0 mL/min, 210 nm); minor enantiomer  $t_r = 6.5$  min, major enantiomer  $t_r = 7.6$  min.  $[\alpha]_D^{20} = 40.8$  ( $c = 0.3$ ,  $\text{CHCl}_3$ ).

#### 7.25 Synthesis of (*R*)-(3-methyl-3-((perfluorophenyl)methyl)-2,3-

dihydrobenzofuran-6-yl)(piperidin-1-yl)methanone (**5d**).

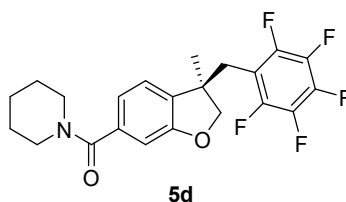

Prepared according to typical procedure from allyl ether **1y** (115.3 mg, 0.3 mmol), after a flash column chromatography (hexanes: Et<sub>2</sub>O = 10:1) afforded the product **4y** as a colorless liquid (109.3 mg, 86% yield) with 87% *ee*. <sup>1</sup>H NMR (400 MHz, CDCl<sub>3</sub>) δ 7.00 (d, *J* = 7.6 Hz, 1 H), 6.89 (dd, *J* = 7.6, 1.4 Hz, 1 H), 6.76 (d, *J* = 1.3 Hz, 1 H), 4.53 (d, *J* = 9.1 Hz, 1 H), 4.14 (d, *J* = 9.1 Hz, 1 H), 3.68 (s, 2 H), 3.30 (s, 2 H), 3.09-2.92 (m, 2 H), 1.70–1.52 (m, 6 H), 1.42 (s, 3 H). <sup>13</sup>C NMR (101 MHz, CDCl<sub>3</sub>) δ 169.80, 159.29, 146.55, 144.10, 141.15, 138.50, 137.51, 136.00, 134.20, 122.87, 119.20, 111.13(m, *J*<sub>F</sub> = 35.4 Hz), 108.22, 82.34 (d, *J*<sub>F</sub> = 2.6 Hz), 48.58, 46.59, 43.01, 32.81, 26.39, 25.57, 24.51, 23.51. <sup>19</sup>F NMR (376 MHz, CDCl<sub>3</sub>) δ -140.31 (dd, *J* = 22.6, 8.0 Hz), -155.72 (td, *J* = 20.8, 11.0 Hz), -162.42 (td, *J* = 22.1, 10.5 Hz). HRMS (ESI) calculated for [M+H]<sup>+</sup> = [C<sub>22</sub>H<sub>21</sub>F<sub>5</sub>NO<sub>2</sub>]<sup>+</sup>: 426.1487 found: 426.1492. Enantiomeric excess was determined by HPLC with a Chiralpak IA column (hexanes: 2-propanol = 70:30, 0.5 mL/min, 210 nm); major enantiomer *tr* = 16.8 min, minor enantiomer *tr* = 22.8 min. [α]<sub>D</sub><sup>20</sup> = -35.4 (*c* = 0.4, CHCl<sub>3</sub>).

7.26 Synthesis of tert-butyl (*R*)-5-methoxy-3-methyl-3-((perfluorophenyl)methyl)indoline-1-carboxylate (**5e**).

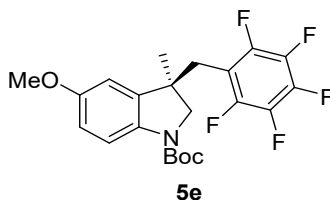

Prepared according to typical procedure from allyl ether **4e** (121.0 mg, 0.3 mmol), after a flash column chromatography (hexanes: Et<sub>2</sub>O = 10:1) afforded the product **5e** as a yellow liquid (111.4 mg, 84% yield) with 82% *ee*. <sup>1</sup>H NMR (400 MHz, CDCl<sub>3</sub>) δ 7.66-7.28 (m, 1 H), 6.72 (dd, *J* = 8.8, 2.6 Hz, 1 H), 6.62 (d, *J* = 27.6 Hz, 1 H), 4.02 (d, *J* = 11.4 Hz, 1 H), 3.75 (s, 3 H), 3.54 (d, *J* = 20.4 Hz, 1 H), 2.92 (d, *J* = 6.1 Hz, 2 H), 1.53

(s, 9 H), 1.37 (d,  $J = 1.4$  Hz, 3 H).  $^{13}\text{C}$  NMR (101 MHz,  $\text{CDCl}_3$ )  $\delta$  155.60, 152.02, 146.61, 144.16, 141.07, 138.50 (dd,  $J_{\text{F}} = 17.3, 10.9$  Hz), 138.07, 135.98 (t,  $J_{\text{F}} = 15.6$  Hz), 135.51, 115.27, 112.87, 111.91-110.33 (m,  $J_{\text{F}} = 158.2$  Hz), 109.10, 80.34, 59.85 (d,  $J = 2.7$  Hz), 55.63, 44.22, 33.59, 28.24, 24.16.  $^{19}\text{F}$  NMR (376 MHz,  $\text{CDCl}_3$ )  $\delta$  -139.91 – -140.39 (m), -155.83 – -156.13 (m), -162.52 (td,  $J = 22.1, 8.1$  Hz). HRMS (EI) calculated for  $[\text{C}_{22}\text{H}_{22}\text{F}_5\text{NO}_3]^+$ : 443.1514 found: 443.1517. Enantiomeric excess was determined by HPLC with a Chiralpak ASH column (hexanes: 2-propanol = 99:1, 0.3 mL/min, 210 nm); major enantiomer  $t_{\text{r}} = 21.7$  min, minor enantiomer  $t_{\text{r}} = 24.0$  min.  $[\alpha]_{\text{D}}^{20} = -12.5$  ( $c = 0.5$ ,  $\text{CHCl}_3$ ).

7.27 Synthesis of (*R*)-1-methyl-1-((perfluorophenyl)methyl)-2,3-dihydro-1H-indene (**5f**).

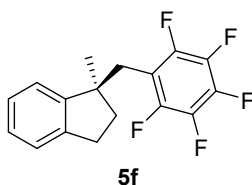

Prepared according to typical procedure from allyl **4f** (81.6mg, 0.3 mmol), after a flash column chromatography (hexanes = 1) afforded the product **5f** as a colorless liquid (57.9 mg, 62% yield) with 88 % *ee*.  $^1\text{H}$  NMR (400 MHz,  $\text{CDCl}_3$ )  $\delta$  7.25-7.16 (m, 3 H), 7.06-7.02 (m, 1 H), 2.99-2.83 (m, 4 H), 2.20-2.11 (m, 1 H), 1.84 (dt,  $J = 12.8, 8.5$  Hz, 1 H), 1.32 (t,  $J = 1.7$  Hz, 3 H).  $^{13}\text{C}$  NMR (101 MHz,  $\text{CDCl}_3$ )  $\delta$  149.46, 146.72, 144.29, 142.97, 140.88, 138.57, 136.08, 127.02, 126.35, 124.71, 122.38, 112.73 (d,  $J_{\text{F}} = 19.3$  Hz), 48.73, 39.03, 33.02, 29.95, 25.57.  $^{19}\text{F}$  NMR (376 MHz,  $\text{CDCl}_3$ )  $\delta$  -140.38 (dd,  $J = 22.8, 8.2$  Hz), -156.96 (d,  $J = 20.7$  Hz), -162.90 (dd,  $J = 30.9, 21.5$  Hz). HRMS (EI) calculated for  $[\text{C}_{17}\text{H}_{13}\text{F}_5]^+$ : 312.0932 found: 312.0935. Enantiomeric excess was determined by HPLC with a Chiralpak IE column (hexanes = 100, 0.3 mL/min, 210 nm); major enantiomer  $t_{\text{r}} = 17.5$  min, minor enantiomer  $t_{\text{r}} = 19.8$  min.  $[\alpha]_{\text{D}}^{20} = -4.5$  ( $c = 0.5$ ,  $\text{CHCl}_3$ ).

7.28 Synthesis of (*R*)-3-methyl-3-(2,3,5,6-tetrafluorobenzyl)-2,3-



dihydrobenzofuran (**7a**).

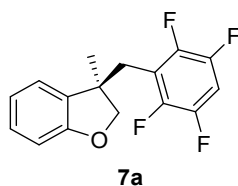

Prepared according to typical procedure from **6a** (135.1 mg, 0.9 mmol), after a flash column chromatography (hexanes: Et<sub>2</sub>O = 100:1) afforded the product **6a** as a colorless liquid (59.4 mg, 67% yield) with 91% *ee*. <sup>1</sup>H NMR (400 MHz, CDCl<sub>3</sub>) δ 7.16 (td, J = 7.7, 1.4 Hz, 1 H), 7.03 (dd, J = 7.5, 1.4 Hz, 1 H), 6.99-6.94 (m, J = 9.7, 7.3, 2.3 Hz, 1 H), 6.92 – 6.87 (m, 1 H), 6.79 (d, J = 8.0 Hz, 1 H), 4.53 (d, J = 8.9 Hz, 1 H), 4.12 (d, J = 9.0 Hz, 1 H), 3.13-3.01 (m, J = 13.5, 2.0 Hz, 2 H), 1.41 (d, J = 1.8 Hz, 3 H). <sup>13</sup>C NMR (101 MHz, CDCl<sub>3</sub>) δ 159.31, 147.57- 145.79 (dm, J<sub>F</sub> = 21.2 Hz), 145.04 – 143.33 (dm, J<sub>F</sub> = 171.3 Hz), 133.45, 128.70, 122.81, 120.67, 117.42 (t, J<sub>F</sub> = 18.3 Hz), 109.85, 104.53 (t, J<sub>F</sub> = 22.7 Hz), 82.19 (t, J<sub>F</sub> = 2.6 Hz), 46.72, 33.21 (d, J<sub>F</sub> = 2.1 Hz), 23.84 (d, J<sub>F</sub> = 2.1 Hz). <sup>19</sup>F NMR (376 MHz, CDCl<sub>3</sub>) δ -139.34 – -139.55 (m), -140.87 – -140.99 (m). HRMS (EI) calculated for [C<sub>16</sub>H<sub>12</sub>F<sub>4</sub>O]<sup>+</sup>: 296.0819 found: 296.0819. Enantiomeric excess was determined by HPLC with a Chiralpak OZ3 column (hexanes = 100, 1.0 mL/min, 210 nm); minor enantiomer tr = 26.8 min, major enantiomer tr = 32.2 min. [α]<sub>D</sub><sup>20</sup> = 31.0 (c = 0.5, CHCl<sub>3</sub>).

7.29 Synthesis of (*R*)-2,3,5,6-tetrafluoro-4-((3-methyl-2,3-dihydrobenzofuran-3-yl)methyl)pyridine (**7b**).

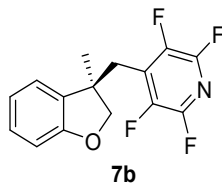

Prepared according to typical procedure from **6b** (136.0 mg, 0.9 mmol), after a flash column chromatography (hexanes: Et<sub>2</sub>O = 50:1) afforded the product **7b** as a white solid (62.7 mg, 70% yield) with 90% *ee*. Mp: 80-82 °C. <sup>1</sup>H NMR (400 MHz, CDCl<sub>3</sub>) δ 7.17 (td, J = 7.7, 1.4 Hz, 1 H), 7.01 (d, J = 7.4 Hz, 1 H), 6.89 (t, J = 7.4 Hz, 1 H), 6.77 (d, J = 8.0 Hz, 1 H), 4.53 (d, J = 9.1 Hz, 1 H), 4.13 (d, J = 9.1 Hz, 1 H), 3.18-3.06 (m,

2 H), 1.47 (s, 3 H).  $^{13}\text{C}$  NMR (101 MHz,  $\text{CDCl}_3$ )  $\delta$  159.23, 143.44 (d,  $J_{\text{F}} = 258.4$  Hz), 139.31, 132.33, 131.17 (d,  $J_{\text{F}} = 17.4$  Hz), 129.13, 122.71, 120.92, 110.06, 82.06 (t,  $J_{\text{F}} = 2.5$  Hz), 46.85, 34.19, 23.73.  $^{19}\text{F}$  NMR (376 MHz,  $\text{CDCl}_3$ )  $\delta$  -91.27 – -91.45 (m), -141.91 – -142.09 (m). HRMS (EI) calculated for  $[\text{C}_{15}\text{H}_{11}\text{F}_4\text{NO}]^+$ : 297.0771 found: 297.0773. Enantiomeric excess was determined by HPLC with a Chiralpak IA column (hexanes: 2-propanol = 95:5, 0.5 mL/min, 210 nm); minor enantiomer  $t_{\text{r}} = 12.1$  min, major enantiomer  $t_{\text{r}} = 15.9$  min.  $[\alpha]_{\text{D}}^{20} = -13.3$  ( $c = 0.4$ ,  $\text{CHCl}_3$ ).

7.30 Synthesis of (*R*)-3-methyl-3-(2,3,5,6-tetrafluoro-4-methoxybenzyl)-2,3-dihydrobenzofuran (**7c**).

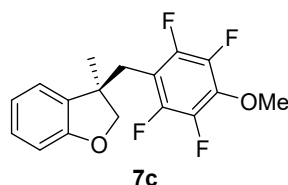

Prepared according to typical procedure from **6c** (162.1 mg, 0.9 mmol), after a flash column chromatography (hexanes:  $\text{Et}_2\text{O} = 50:1$ ) afforded the product **7c** as a colorless liquid (80.0 mg, 82% yield) with 88% *ee*.  $^1\text{H}$  NMR (400 MHz,  $\text{CDCl}_3$ )  $\delta$  7.16 (td,  $J = 7.6, 1.4$  Hz, 1 H), 7.03 (dd,  $J = 7.4, 1.4$  Hz, 1 H), 6.89 (td,  $J = 7.4, 1.0$  Hz, 1 H), 6.79 (dd,  $J = 8.0, 0.9$  Hz, 1 H), 4.51 (d,  $J = 8.9$  Hz, 1 H), 4.11 (d,  $J = 8.9$  Hz, 1 H), 4.06 (t,  $J = 1.3$  Hz, 3 H), 3.05-2.95 (m, 2 H), 1.39 (d,  $J = 1.3$  Hz, 3 H).  $^{13}\text{C}$  NMR (101 MHz,  $\text{CDCl}_3$ )  $\delta$  159.31, 146.77, 144.30, 141.84, 139.39, 133.59, 128.63 (d,  $J_{\text{F}} = 2.8$  Hz), 122.82, 120.63, 109.80, 82.15 (d,  $J_{\text{F}} = 2.9$  Hz), 62.04 (t,  $J_{\text{F}} = 3.6$  Hz), 46.67, 32.62, 23.88.  $^{19}\text{F}$  NMR (376 MHz,  $\text{CDCl}_3$ )  $\delta$  -142.03 – -142.37 (m), -158.21 – -158.55 (m). HRMS (EI) calculated for  $[\text{C}_{17}\text{H}_{14}\text{F}_4\text{O}_2]^+$ : 326.0924 found: 326.0929. Enantiomeric excess was determined by HPLC with a Chiralpak IC column (hexanes: 2-propanol = 99:1, 0.3 mL/min, 254 nm); minor enantiomer  $t_{\text{r}} = 15.9$  min, major enantiomer  $t_{\text{r}} = 17.6$  min.  $[\alpha]_{\text{D}}^{20} = -20.1$  ( $c = 0.5$ ,  $\text{CHCl}_3$ ).

7.31 Synthesis of (*R*)-3-(4-(tert-butoxy)-2,3,5,6-tetrafluorobenzyl)-3-methyl-2,3-dihydrobenzofuran (**7d**).

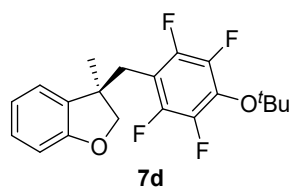

Prepared according to typical procedure from allyl ether **6d** (200.0 mg, 0.9 mmol), after a flash column chromatography (hexanes: Et<sub>2</sub>O = 50:1) afforded the product **7d** as a colorless liquid (95.8 mg, 87% yield) with 87% *ee*. <sup>1</sup>H NMR (400 MHz, CDCl<sub>3</sub>) δ 7.19-7.11 (m, 1 H), 6.99 (dd, *J* = 7.4, 1.4 Hz, 1 H), 6.86 (td, *J* = 7.4, 1.0 Hz, 1 H), 6.76 (dt, *J* = 7.9, 0.8 Hz, 1 H), 4.53 (d, *J* = 8.9 Hz, 1 H), 4.11 (d, *J* = 8.9 Hz, 1 H), 3.06-2.95 (m, 2 H), 1.40 (dt, *J* = 2.3, 1.2 Hz, 12 H). <sup>13</sup>C NMR (101 MHz, CDCl<sub>3</sub>) δ 159.38, 146.70, 144.48-144.28 (m, *J*<sub>F</sub> = 20.0 Hz), 141.88, 133.50, 132.70, 128.65, 122.87, 120.61, 111.20 (t, *J*<sub>F</sub> = 18.9 Hz), 109.76, 84.73, 82.35 (t, *J*<sub>F</sub> = 2.9 Hz), 46.74, 32.91, 28.33, 23.82. <sup>19</sup>F NMR (376 MHz, CDCl<sub>3</sub>) δ -142.62 (dd, *J* = 22.6, 9.3 Hz), -152.11 (dd, *J* = 23.0, 9.3 Hz). HRMS (EI) calculated for [C<sub>20</sub>H<sub>20</sub>F<sub>4</sub>O<sub>2</sub>]<sup>+</sup>: 368.1394 found: 368.1395. Enantiomeric excess was determined by HPLC with a Chiralpak IG column (hexanes: 2-propanol = 99:1, 0.3 mL/min, 210 nm); minor enantiomer *tr* = 15.7 min, major enantiomer *tr* = 16.6 min. [α]<sub>D</sub><sup>20</sup> = -22.5 (*c* = 0.5, CHCl<sub>3</sub>).

7.32 Synthesis of (*R*)-3-methyl-3-(2,3,5,6-tetrafluoro-4-(naphthalen-1-yloxy)benzyl)-2,3-dihydrobenzofuran (**7e**).

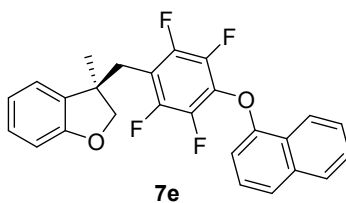

Prepared according to typical procedure from allyl ether **6e** (263.0 mg, 0.9 mmol), after a flash column chromatography (hexanes: Et<sub>2</sub>O = 50:1) afforded the product **7e** as a white solid (114.4 mg, 87% yield) with 90% *ee*. Mp: 120-122 °C. <sup>1</sup>H NMR (400 MHz, CDCl<sub>3</sub>) δ 8.45-8.42 (m, 1 H), 7.94-7.88 (m, 1 H), 7.66-7.58 (m, 3 H), 7.41-7.32 (m, 1 H), 7.24-7.18 (m, 1 H), 7.10 (dd, *J* = 7.4, 1.4 Hz, 1 H), 6.94 (td, *J* = 7.4, 1.0 Hz, 1 H), 6.85 (dt, *J* = 8.0, 0.8 Hz, 1 H), 6.68-6.63 (m, 1 H), 4.60 (d, *J* = 9.0 Hz, 1 H), 4.18 (d, *J*

= 9.0 Hz, 1 H), 3.17-3.06 (m, 2 H), 1.49 (t,  $J = 1.2$  Hz, 3 H).  $^{13}\text{C}$  NMR (101 MHz,  $\text{CDCl}_3$ )  $\delta$  159.39, 153.15, 146.98, 144.51 (dm,  $J_{\text{F}} = 12.8$  Hz), 142.59 (dm,  $J_{\text{F}} = 17.4$  Hz), 140.08 (dm,  $J_{\text{F}} = 12.5$  Hz), 134.73, 133.25, 132.27, 128.79, 127.62, 126.93, 126.18, 125.15, 124.80, 123.43, 122.88, 121.59, 120.73, 112.77 (t,  $J_{\text{F}} = 18.9$  Hz), 109.83, 107.44, 82.25 (t,  $J_{\text{F}} = 2.5$  Hz), 46.78, 33.04, 23.85.  $^{19}\text{F}$  NMR (376 MHz,  $\text{CDCl}_3$ )  $\delta$  -140.57 (dd,  $J = 22.2, 9.6$  Hz), -154.55 – -154.68 (m). HRMS (EI) calculated for  $[\text{C}_{26}\text{H}_{18}\text{F}_4\text{O}_2]^+$ : 438.1237 found: 438.1237. Enantiomeric excess was determined by HPLC with a Chiralpak ADH column (hexanes: 2-propanol = 99:1, 1.0 mL/min, 230 nm); minor enantiomer  $t_{\text{r}} = 8.6$  min, major enantiomer  $t_{\text{r}} = 9.5$  min.  $[\alpha]_{\text{D}}^{20} = -10.5$  ( $c = 0.5$ ,  $\text{CHCl}_3$ ).

7.33 Synthesis of (*R*)-3-methyl-3-(2,3,5,6-tetrafluoro-4-(naphthalen-2-yloxy)benzyl)-2,3-dihydrobenzofuran (**7f**).

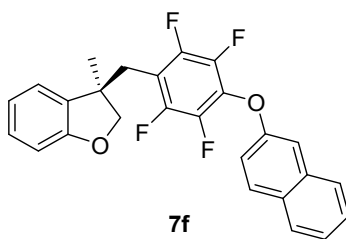

Prepared according to typical procedure from allyl ether **6f** (263.0 mg, 0.9 mmol), after a flash column chromatography (hexanes:  $\text{Et}_2\text{O} = 50:1$ ) afforded the product **7f** as a white solid (112.2 mg, 85% yield) with 93% *ee*. Mp: 125-127 °C.  $^1\text{H}$  NMR (400 MHz,  $\text{CDCl}_3$ )  $\delta$  7.85 (t,  $J = 8.3$  Hz, 2 H), 7.72 (dd,  $J = 8.2, 1.2$  Hz, 1 H), 7.53 – 7.38 (m, 2 H), 7.31 (dd,  $J = 9.0, 2.6$  Hz, 1 H), 7.19 – 7.15 (m, 2 H), 7.08 (dd,  $J = 7.5, 1.4$  Hz, 1 H), 6.92 (td,  $J = 7.4, 1.0$  Hz, 1 H), 6.83 (dt,  $J = 8.0, 0.7$  Hz, 1 H), 4.59 (d,  $J = 9.0$  Hz, 1 H), 4.17 (d,  $J = 9.0$  Hz, 1 H), 3.15 – 3.04 (m, 2 H), 1.48 (d,  $J = 1.2$  Hz, 3 H).  $^{13}\text{C}$  NMR (101 MHz,  $\text{CDCl}_3$ )  $\delta$  159.47, 155.11, 147.02, 144.58, 142.71 (dm,  $J_{\text{F}} = 14.9$  Hz), 140.30 (dm,  $J_{\text{F}} = 18.0$  Hz), 133.97, 133.29, 130.34, 130.19, 128.87, 127.84, 127.12, 126.94, 125.03, 122.97, 120.79, 117.20, 113.03, 112.85 (d,  $J_{\text{F}} = 18.0$  Hz), 110.16, 109.89, 82.34, 46.87, 33.16, 23.95.  $^{19}\text{F}$  NMR (376 MHz,  $\text{CDCl}_3$ )  $\delta$  -140.59 (dt,  $J = 19.8, 8.9$  Hz), -154.60 (dd,  $J = 21.5, 9.4$  Hz). HRMS (EI) calculated for  $[\text{C}_{26}\text{H}_{18}\text{F}_4\text{O}_2]^+$ : 438.1237 found: 438.1237.

Enantiomeric excess was determined by HPLC with a Chiralpak ADH column (hexanes: 2-propanol = 99:1, 1.0 mL/min, 230 nm); minor enantiomer  $t_r = 7.6$  min, major enantiomer  $t_r = 8.2$  min.  $[\alpha]_D^{20} = -2.5$  ( $c = 0.3$ ,  $\text{CHCl}_3$ ).

7.34 Synthesis of ethyl (*R*)-3-methyl-3-(2,3,5,6-tetrafluoro-4-((1-methylnaphthalen-2-yl)oxy)benzyl)-2,3-dihydrobenzofuran (**7g**).

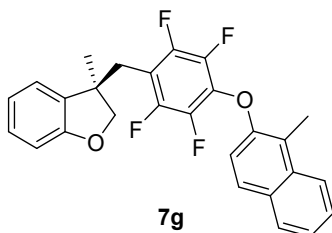

Prepared according to typical procedure from allyl ether **6g** (275.7 mg, 0.9 mmol), after a flash column chromatography (hexanes:  $\text{Et}_2\text{O} = 50:1$ ) afforded the product **7g** as a white solid (116.4 mg, 86% yield) with 90% *ee*. Mp: 81-83 °C.  $^1\text{H}$  NMR (400 MHz,  $\text{CDCl}_3$ )  $\delta$  8.06 (d,  $J = 8.5$  Hz, 1 H), 7.84-7.81 (m, 1 H), 7.67 (d,  $J = 9.0$  Hz, 1 H), 7.61-7.56 (m, 1 H), 7.52-7.44 (m, 1 H), 7.19 (td,  $J = 7.7, 1.4$  Hz, 1 H), 7.07 (dd,  $J = 7.5, 1.4$  Hz, 1 H), 6.93 (q,  $J = 8.1$  Hz, 2 H), 6.83 (d,  $J = 8.0$  Hz, 1 H), 4.57 (d,  $J = 9.0$  Hz, 1 H), 4.16 (d,  $J = 9.0$  Hz, 1 H), 3.08 (qt,  $J = 13.6, 1.9$  Hz, 2 H), 2.75 (s, 3 H), 1.46 (s, 3 H).  $^{13}\text{C}$  NMR (101 MHz,  $\text{CDCl}_3$ )  $\delta$  159.37, 152.04, 146.94, 144.50, 142.62(dm,  $J_F = 15.2$  Hz), 140.15 (dm,  $J_F = 13.0$  Hz), 138.01, 133.61, 133.33, 130.49, 128.76, 128.44, 127.51, 126.69, 124.67, 123.88, 122.87, 121.03, 120.72, 115.09, 111.92 (d,  $J_F = 19.0$  Hz), 109.84, 82.25 (t,  $J_F = 2.8$  Hz), 46.77, 32.96, 23.86, 10.90.  $^{19}\text{F}$  NMR (376 MHz,  $\text{CDCl}_3$ )  $\delta$  -140.96 (dd,  $J = 22.4, 9.5$  Hz), -155.72 – -155.80 (m). HRMS (EI) calculated for  $[\text{C}_{27}\text{H}_{20}\text{F}_4\text{O}_2]^+$ : 452.1394 found: 452.1393. Enantiomeric excess was determined by HPLC with a Chiralpak IG column (hexanes: 2-propanol = 99:1, 0.3 mL/min, 210 nm); minor enantiomer  $t_r = 21.2$  min, major enantiomer  $t_r = 27.0$  min.  $[\alpha]_D^{20} = -11.4$  ( $c = 0.5$ ,  $\text{CHCl}_3$ ).

7.35 Synthesis of (*R*)-3-methyl-3-(2,3,5,6-tetrafluoro-4-phenoxybenzyl)-2,3-dihydrobenzofuran (**7h**).

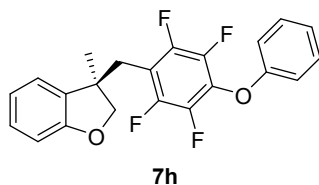

Prepared according to typical procedure from allyl ether **6h** (218.0 mg, 0.9 mmol), after a flash column chromatography (hexanes: Et<sub>2</sub>O = 50:1) afforded the product **7h** as a white solid (105.6 mg, 90% yield) with 90% *ee*. Mp: 59-60 °C. <sup>1</sup>H NMR (400 MHz, CDCl<sub>3</sub>) δ 7.41-7.31 (m, 2 H), 7.15-7.06 (m, 2 H), 7.05 (dd, *J* = 7.4, 1.4 Hz, 1 H), 6.97-6.88 (m, 3 H), 6.80 (dt, *J* = 8.0, 0.8 Hz, 1 H), 4.56 (d, *J* = 9.0 Hz, 1 H), 4.15 (d, *J* = 9.0 Hz, 1 H), 3.12-3.01 (m, 2 H), 1.45 (t, *J* = 1.2 Hz, 3 H). <sup>13</sup>C NMR (101 MHz, CDCl<sub>3</sub>) δ 159.37, 157.18, 146.97 (dm, *J<sub>F</sub>* = 11.7 Hz), 144.47, 142.60 (dm, *J<sub>F</sub>* = 16.0 Hz), 140.11 (dm, *J<sub>F</sub>* = 16.5 Hz), 133.27, 132.12, 129.77, 128.78, 123.64, 122.87, 120.72, 115.44, 112.58 (t, *J<sub>F</sub>* = 18.9 Hz), 109.83, 82.26 (t, *J<sub>F</sub>* = 2.9 Hz), 46.78, 33.02, 23.86. <sup>19</sup>F NMR (376 MHz, CDCl<sub>3</sub>) δ -140.81 (dd, *J* = 22.3, 9.5 Hz), -154.69 – -154.81 (m). HRMS (EI) calculated for [C<sub>22</sub>H<sub>16</sub>F<sub>4</sub>O<sub>2</sub>]<sup>+</sup>: 388.1081 found: 388.1083. Enantiomeric excess was determined by HPLC with a Chiralpak IG column (hexanes: 2-propanol = 99:1, 0.3 mL/min, 210 nm); minor enantiomer *tr* = 19.9 min, major enantiomer *tr* = 21.8 min. [α]<sub>D</sub><sup>20</sup> = -15.6 (*c* = 0.5, CHCl<sub>3</sub>).

7.36 Synthesis of (*R*)-3-methyl-3-(2,3,5,6-tetrafluoro-4-(*p*-tolylloxy)benzyl)-2,3-dihydrobenzofuran (**7i**).

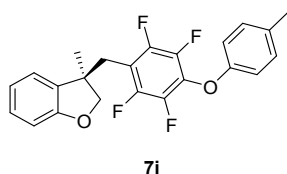

Prepared according to typical procedure from allyl ether **6i** (230.6 mg, 0.9 mmol), after a flash column chromatography (hexanes: Et<sub>2</sub>O = 50:1) afforded the product **7i** as a white solid (103.7 mg, 86% yield) with 90% *ee*. Mp: 92-94 °C. <sup>1</sup>H NMR (400 MHz, CDCl<sub>3</sub>) δ 7.19-7.11 (m, 3 H), 7.05 (dd, *J* = 7.4, 1.4 Hz, 1 H), 6.92 -6.79 (m, 4 H), 4.56 (d, *J* = 9.0 Hz, 1 H), 4.15 (d, *J* = 9.0 Hz, 1 H), 3.12-3.01 (m, 2 H), 2.33 (s, 3 H), 1.45 (t, *J* = 1.2 Hz, 3 H). <sup>13</sup>C NMR (101 MHz, CDCl<sub>3</sub>) δ 159.42, 155.28, 146.97–146.81 (dm,

$J_F = 16.0$  Hz), 144.62-144.37 (dm,  $J_F = 25.3$  Hz), 142.67 (dm,  $J_F = 16.0$  Hz), 140.18 (dm,  $J_F = 16.4$  Hz), 133.35, 133.23, 132.56, 130.21, 128.80, 122.91, 120.75, 115.40, 112.37 (t,  $J_F = 19.0$  Hz), 109.86, 82.31 (t,  $J_F = 2.9$  Hz), 46.82, 33.04, 23.90, 20.60.  $^{19}\text{F}$  NMR (376 MHz,  $\text{CDCl}_3$ )  $\delta$  -140.97 (dd,  $J = 22.2, 9.3$  Hz), -154.86 – -154.94 (m). HRMS (EI) calculated for  $[\text{C}_{23}\text{H}_{18}\text{F}_4\text{O}_2]^+$ : 402.1237 found: 402.1238. Enantiomeric excess was determined by HPLC with a Chiralpak OJH column (hexanes: 2-propanol = 95:5, 0.5 mL/min, 210 nm); minor enantiomer  $t_r = 17.3$  min, major enantiomer  $t_r = 20.1$  min.  $[\alpha]_D^{20} = -10.3$  ( $c = 0.5, \text{CHCl}_3$ ).

7.37 Synthesis of (*R*)-3-methyl-3-(2,3,5,6-tetrafluoro-4-(4-methoxyphenoxy)benzyl)-2,3-dihydrobenzofuran (**7j**).

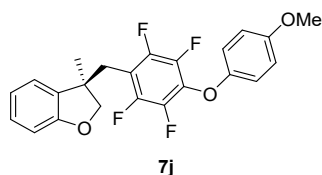

Prepared according to typical procedure from allyl ether **6j** (245.0 mg, 0.9 mmol), after a flash column chromatography (hexanes:  $\text{Et}_2\text{O} = 30:1$ ) afforded the product **7j** as a white solid (107.5 mg, 86% yield) with 89% *ee*. Mp: 60-62 °C.  $^1\text{H}$  NMR (400 MHz,  $\text{CDCl}_3$ )  $\delta$  7.21-7.14 (m, 1 H), 7.06 (dd,  $J = 7.4, 1.4$  Hz, 1 H), 6.96-6.91 (m, 3 H), 6.89-6.84 (m, 2 H), 6.81 (dt,  $J = 8.0, 0.8$  Hz, 1 H), 4.56 (d,  $J = 9.0$  Hz, 1 H), 4.15 (d,  $J = 9.0$  Hz, 1 H), 3.79 (s, 3 H), 3.12-3.01 (m, 2 H), 1.45 (t,  $J = 1.2$  Hz, 3 H).  $^{13}\text{C}$  NMR (101 MHz,  $\text{CDCl}_3$ )  $\delta$  159.35, 155.85, 151.28, 146.95-146.75 (dm,  $J_F = 20.2$  Hz), 144.55-144.35 (dm,  $J_F = 20.2$  Hz), 142.65-142.50 (dm,  $J_F = 15.2$  Hz), 140.17-139.97 (dm,  $J_F = 20.2$  Hz), 133.30, 133.02, 128.72, 122.84, 120.67, 116.80, 114.69, 112.15 (t,  $J_F = 18.9$  Hz), 109.78, 82.20 (t,  $J_F = 2.8$  Hz), 55.58, 46.72, 32.92, 23.80.  $^{19}\text{F}$  NMR (376 MHz,  $\text{CDCl}_3$ )  $\delta$  -140.97 (dd,  $J = 22.3, 9.4$  Hz), -155.01 – -155.16 (m). HRMS (EI) calculated for  $[\text{C}_{23}\text{H}_{18}\text{F}_4\text{O}_3]^+$ : 418.1187 found: 418.1189. Enantiomeric excess was determined by HPLC with a Chiralpak IA column (hexanes: 2-propanol = 99:1, 0.3 mL/min, 210 nm); minor enantiomer  $t_r = 27.0$  min, major enantiomer  $t_r = 28.4$  min.  $[\alpha]_D^{20} = -10.0$  ( $c = 0.5, \text{CHCl}_3$ ).

7.38 Synthesis of (*R*)-3-methyl-3-(2,3,5,6-tetrafluoro-4-(4-(trifluoromethyl)phenoxy)benzyl)-2,3-dihydrobenzofuran (**7k**).

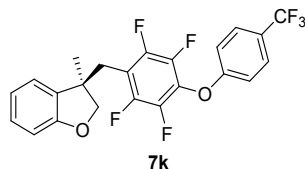

Prepared according to typical procedure from allyl ether **6k** (279.2 mg, 0.9 mmol), after a flash column chromatography (hexanes: Et<sub>2</sub>O = 50:1) afforded the product **7k** as a white solid (119.1 mg, 87% yield) with 92% *ee*. Mp: 79-81 °C. <sup>1</sup>H NMR (400 MHz, CDCl<sub>3</sub>) δ 7.63-7.60 (m, 2 H), 7.19-7.14 (m, 1 H), 7.09-7.01 (m, 3 H), 6.91 (td, *J* = 7.4, 1.0 Hz, 1 H), 6.79 (dt, *J* = 8.0, 0.8 Hz, 1 H), 4.57 (d, *J* = 9.0 Hz, 1 H), 4.15 (d, *J* = 9.0 Hz, 1 H), 3.14-3.03 (m, 2 H), 1.47 (t, *J* = 1.1 Hz, 3 H). <sup>13</sup>C NMR (101 MHz, CDCl<sub>3</sub>) δ 159.40, 159.30, 147.09-146.84 (tm, *J*<sub>F</sub> = 25.3 Hz), 144.63-144.39 (tm, *J*<sub>F</sub> = 24.2 Hz), 142.46-142.23 (dm, *J*<sub>F</sub> = 20.2 Hz), 139.97-139.73 (dm, *J*<sub>F</sub> = 24.2 Hz), 133.06, 131.13, 128.85, 127.33 (q, *J*<sub>F</sub> = 3.7 Hz), 126.02 (q, *J*<sub>F</sub> = 33.0 Hz), 123.91 (q, *J*<sub>F</sub> = 270.0 Hz), 122.90, 120.76, 115.53, 113.54 (t, *J*<sub>F</sub> = 18.7 Hz), 109.81, 82.25 (d, *J*<sub>F</sub> = 2.8 Hz), 46.82, 33.16, 23.87. <sup>19</sup>F NMR (376 MHz, CDCl<sub>3</sub>) δ -61.93, -140.08 (dd, *J* = 22.3, 9.6 Hz), -154.46 – -154.55 (m). HRMS (EI) calculated for [C<sub>23</sub>H<sub>15</sub>F<sub>7</sub>O<sub>2</sub>]<sup>+</sup>: 456.0955 found: 456.0957. Enantiomeric excess was determined by HPLC with a Chiralpak ODH column (hexanes: 2-propanol = 99:1, 0.3 mL/min, 210 nm); minor enantiomer *tr* = 24.4 min, major enantiomer *tr* = 26.6 min. [*α*]<sub>D</sub><sup>20</sup> = -7.6 (*c* = 0.5, CHCl<sub>3</sub>). <sup>13</sup>C NMR (101 MHz, CDCl<sub>3</sub>) δ 126.02 (q, *J* = 33.0 Hz).

7.39 Synthesis of (*R*)-3-methyl-3-((2,3,5,6-tetrafluoro-[1,1'-biphenyl]-4-yl)methyl)-2,3-dihydrobenzofuran (**7l**).

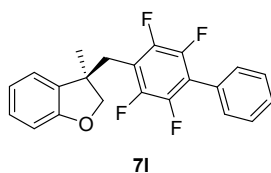

Prepared according to typical procedure from allyl ether **6l** (203.6 mg, 0.9 mmol), after



a flash column chromatography (hexanes: Et<sub>2</sub>O = 100:1) afforded the product **7l** as a white solid (96.1 mg, 86% yield) with 87% *ee*. Mp: 79-80 °C. <sup>1</sup>H NMR (400 MHz, CDCl<sub>3</sub>) δ 7.55-7.44 (m, 5 H), 7.20 (td, *J* = 7.7, 1.4 Hz, 1 H), 7.12 (dd, *J* = 7.4, 1.4 Hz, 1 H), 6.93 (td, *J* = 7.4, 1.0 Hz, 1 H), 6.84 (d, *J* = 8.0 Hz, 1 H), 4.60 (d, *J* = 8.9 Hz, 1 H), 4.18 (d, *J* = 8.9 Hz, 1 H), 3.18-3.08 (m, 2 H), 1.47 (t, *J* = 1.3 Hz, 3 H). <sup>13</sup>C NMR (101 MHz, CDCl<sub>3</sub>) δ 159.32, 146.72 (tm, *J<sub>F</sub>* = 9.6 Hz), 144.83 (dm, *J<sub>F</sub>* = 15.5 Hz), 144.38-144.27 (tm, *J<sub>F</sub>* = 12.1 Hz), 142.50-142.30 (dm, *J<sub>F</sub>* = 20.2 Hz), 133.66, 130.13-130.09 (tm, *J<sub>F</sub>* = 4.0 Hz), 129.03, 128.69, 128.56, 127.44, 122.84, 120.70, 119.44-119.11 (tm, *J<sub>F</sub>* = 33.3 Hz), 115.54 (t, *J<sub>F</sub>* = 18.6 Hz), 109.87, 82.15 (t, *J<sub>F</sub>* = 2.6 Hz), 46.80, 33.10, 23.99. <sup>19</sup>F NMR (376 MHz, CDCl<sub>3</sub>) δ -141.16 (dd, *J* = 23.2, 12.5 Hz), -144.47 (dd, *J* = 22.7, 12.7 Hz). HRMS (EI) calculated for [C<sub>22</sub>H<sub>16</sub>F<sub>4</sub>O]<sup>+</sup>: 372.1132 found: 372.1132. Enantiomeric excess was determined by HPLC with a Chiralpak IF column (hexanes: 2-propanol = 99:1, 0.3 mL/min, 190 nm); minor enantiomer *tr* = 18.4 min, major enantiomer *tr* = 19.5 min. [α]<sub>D</sub><sup>20</sup> = -26.2 (*c* = 0.5, CHCl<sub>3</sub>).

7.40 Synthesis of (*R*)-3-(4-benzyl-2,3,5,6-tetrafluorobenzyl)-3-methyl-2,3-dihydrobenzofuran (**7m**).

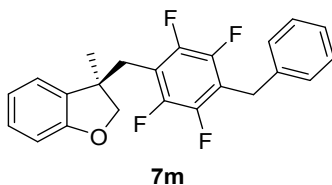

Prepared according to typical procedure from allyl ether **6m** (279.2 mg, 0.9 mmol), after a flash column chromatography (hexanes: Et<sub>2</sub>O = 100:1) afforded the product **7m** as a white solid (98.5 mg, 85% yield) with 88% *ee*. Mp: 90-92 °C. <sup>1</sup>H NMR (400 MHz, CDCl<sub>3</sub>) δ 7.33-7.22 (m, 5 H), 7.18-7.11 (m, 1 H), 7.04 (dd, *J* = 7.4, 1.4 Hz, 1 H), 6.89 (td, *J* = 7.4, 1.0 Hz, 1 H), 6.79 (dt, *J* = 8.0, 0.8 Hz, 1 H), 4.52 (d, *J* = 9.0 Hz, 1 H), 4.10 (d, *J* = 9.0 Hz, 1 H), 4.05 (d, *J* = 1.8 Hz, 2 H), 3.10-2.96 (m, 2 H), 1.39 (t, *J* = 1.3 Hz, 3 H). <sup>13</sup>C NMR (101 MHz, CDCl<sub>3</sub>) δ 159.30, 146.25 (dm, *J<sub>F</sub>* = 16.2 Hz), 145.94, 143.84, 143.51 (dm, *J<sub>F</sub>* = 33.3 Hz), 137.77, 133.71, 128.69, 128.65, 128.43, 126.79, 122.82, 120.65, 118.11 (t, *J<sub>F</sub>* = 18.7 Hz), 114.66 (t, *J<sub>F</sub>* = 18.6 Hz), 109.84, 82.16 (t, *J<sub>F</sub>* = 2.8 Hz),

46.74, 33.00, 28.59, 23.92.  $^{19}\text{F}$  NMR (376 MHz,  $\text{CDCl}_3$ )  $\delta$  -141.43 (dd,  $J = 22.7, 12.8$  Hz), -144.25 (dd,  $J = 22.7, 12.7$  Hz). HRMS (EI) calculated for  $[\text{C}_{23}\text{H}_{18}\text{F}_4\text{O}_3]^+$ : 386.1288 found: 386.1288. Enantiomeric excess was determined by HPLC with a Chiralpak IG column (hexanes: 2-propanol = 99:1, 0.3 mL/min, 210 nm); minor enantiomer  $t_r = 18.0$  min, major enantiomer  $t_r = 21.9$  min.  $[\alpha]_D^{20} = -22.5$  ( $c = 0.5$ ,  $\text{CHCl}_3$ ).

7.41 Synthesis of (*R*)-1-(2,3,5,6-tetrafluoro-4-((3-methyl-2,3-dihydrobenzofuran-3-yl)methyl)phenyl)-1H-indole (**7n**).

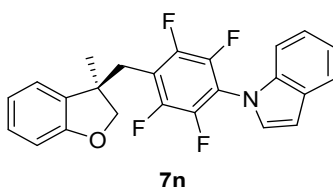

Prepared according to typical procedure from allyl ether **6n** (238.7 mg, 0.9 mmol), after a flash column chromatography (hexanes:  $\text{Et}_2\text{O} = 50:1$ ) afforded the product **7n** as a white solid (105.7 mg, 86% yield) with 91% *ee*. Mp: 130-132 °C.  $^1\text{H}$  NMR (400 MHz,  $\text{CDCl}_3$ )  $\delta$  7.72-7.71 (m, 1 H), 7.33-7.27 (m, 1 H), 7.26-7.11 (m, 5 H), 6.95 (td,  $J = 7.4, 1.0$  Hz, 1 H), 6.84 (dt,  $J = 8.0, 0.6$  Hz, 1 H), 6.80 (dd,  $J = 3.3, 0.9$  Hz, 1 H), 4.62 (d,  $J = 9.0$  Hz, 1 H), 4.20 (d,  $J = 9.0$  Hz, 1 H), 3.22-3.11 (m, 2 H), 1.51 (t,  $J = 1.2$  Hz, 3 H).  $^{13}\text{C}$  NMR (101 MHz,  $\text{CDCl}_3$ )  $\delta$  159.43, 146.98 (tm,  $J_F = 74.7$  Hz), 144.52, 143.84 (dm,  $J_F = 16.3$  Hz), 141.41-141.25 (dm,  $J_F = 16.2$  Hz), 136.31, 133.25, 128.96, 128.72, 128.27, 123.14, 122.93, 121.25, 121.24, 120.87, 117.35, 116.01 (tm,  $J_F = 18.8$  Hz), 110.45, 109.99, 105.49, 82.25 (t,  $J_F = 2.6$  Hz), 46.97, 33.37, 24.01.  $^{19}\text{F}$  NMR (376 MHz,  $\text{CDCl}_3$ )  $\delta$  -139.70, -146.64 (dd,  $J = 21.9, 10.2$  Hz). HRMS (EI) calculated for  $[\text{C}_{24}\text{H}_{17}\text{F}_4\text{NO}]^+$ : 411.1241 found: 411.1245. Enantiomeric excess was determined by HPLC with a Chiralpak IG column (hexanes: 2-propanol = 99:1, 0.3 mL/min, 254 nm); minor enantiomer  $t_r = 23.7$  min, major enantiomer  $t_r = 24.9$  min.  $[\alpha]_D^{20} = -18.1$  ( $c = 0.5$ ,  $\text{CHCl}_3$ ).

7.42 Synthesis of (*R*)-3-methyl-3-(2,3,6-trifluorobenzyl)-2,3-dihydrobenzofuran

(7o).

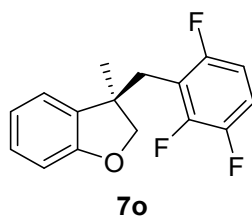

Prepared according to typical procedure from allyl ether **6o** (118.8 mg, 0.9 mmol), after a flash column chromatography (hexanes: Et<sub>2</sub>O = 50:1) afforded the product **7o** as a colorless liquid (41.5 mg, 51% yield) with 68% *ee*. <sup>1</sup>H NMR (400 MHz, CDCl<sub>3</sub>) δ 7.19–7.13 (m, 1 H), 7.08–6.98 (m, 2 H), 6.88 (t, *J* = 7.4 Hz, 1 H), 6.81–6.75 (m, 2 H), 4.55 (d, *J* = 8.9 Hz, 1 H), 4.11 (d, *J* = 8.9 Hz, 1 H), 3.04 (qt, *J* = 13.6, 1.9 Hz, 2 H), 1.39 (s, 3 H). <sup>13</sup>C NMR (101 MHz, CDCl<sub>3</sub>) 159.39, 158.13 (d, *J*<sub>F</sub> = 6.4 Hz), 155.68, 151.05–148.22 (dm, *J*<sub>F</sub> = 230.3 Hz), 148.24–145.29 (dm, *J*<sub>F</sub> = 231.3 Hz), 134.02, 128.55, 122.94, 120.59, 116.03 (dd, *J*<sub>F</sub> = 22.4, 16.7 Hz), 115.26 (m, *J*<sub>F</sub> = 19.3 Hz), 110.36 (m, *J* = 25.9 Hz), 109.82, 82.34 (t, *J*<sub>F</sub> = 2.8 Hz), 46.75, 32.94 (d, *J*<sub>F</sub> = 1.6 Hz), 24.01 (d, *J*<sub>F</sub> = 1.9 Hz). <sup>19</sup>F NMR (376 MHz, CDCl<sub>3</sub>) δ -117.24 (dt, *J* = 14.1, 6.3 Hz), -135.06 (dd, *J* = 21.5, 8.8 Hz), -142.31– -142.45 (m). HRMS (EI) calculated for [C<sub>24</sub>H<sub>17</sub>F<sub>4</sub>NO]<sup>+</sup>: 278.0918 found: 278.0922. Enantiomeric excess was determined by HPLC with a Chiralpak OJH column (hexanes: 2-propanol = 98:2, 1.0 mL/min, 210 nm); minor enantiomer *tr* = 7.4 min, major enantiomer *tr* = 8.2 min. [α]<sub>D</sub><sup>20</sup> = -12.0 (*c* = 0.4, CHCl<sub>3</sub>).

7.43 Synthesis of (*R*)-3-methyl-3-(2,4,6-trifluorobenzyl)-2,3-dihydrobenzofuran (**7p**).

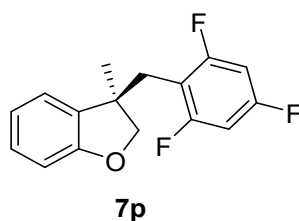

Prepared according to typical procedure from allyl ether **6p** (118.8 mg, 0.9 mmol), after a flash column chromatography (hexanes: Et<sub>2</sub>O = 50:1) afforded the product **7p** as a

colorless liquid (39.9 mg, 51% yield) with 67% *ee*.  $^1\text{H}$  NMR (400 MHz,  $\text{CDCl}_3$ )  $\delta$  7.14 (td,  $J = 7.7, 1.4$  Hz, 1 H), 7.01 (dd,  $J = 7.5, 1.4$  Hz, 1 H), 6.87 (td,  $J = 7.4, 1.0$  Hz, 1 H), 6.78 (d,  $J = 8.0$  Hz, 1 H), 6.67 – 6.55 (m, 2 H), 4.52 (d,  $J = 8.9$  Hz, 1 H), 4.10 (d,  $J = 8.8$  Hz, 1 H), 2.90-3.01 (m, 2 H), 1.37 (d,  $J = 1.3$  Hz, 3 H).  $^{13}\text{C}$  NMR (101 MHz,  $\text{CDCl}_3$ )  $\delta$  163.41-162.20 (dm,  $J_{\text{F}} = 122.2$  Hz), 161.57-159.95 (dm,  $J_{\text{F}} = 163.6$  Hz), 159.42, 134.07, 128.46, 122.98, 120.51, 110.10, 109.77, 101.35-96.86 (dm,  $J_{\text{F}} = 453.5$  Hz), 82.38 (t,  $J_{\text{F}} = 2.8$  Hz), 46.68, 32.27, 23.97 (t,  $J_{\text{F}} = 1.8$  Hz).  $^{19}\text{F}$  NMR (376 MHz,  $\text{CDCl}_3$ )  $\delta$  -109.01 – -109.18 (m), -109.88 – -110.10 (m). HRMS (EI) calculated for  $[\text{C}_{24}\text{H}_{17}\text{F}_4\text{NO}]^+$ : 278.0918 found: 278.0915. Enantiomeric excess was determined by HPLC with a Chiralpak OJH column (hexanes: 2-propanol = 98:2, 1.0 mL/min, 210 nm); minor enantiomer  $t_{\text{r}} = 5.7$  min, major enantiomer  $t_{\text{r}} = 6.7$  min.  $[\alpha]_{\text{D}}^{20} = -14.4$  ( $c = 0.4$ ,  $\text{CHCl}_3$ ).

7.44 Synthesis of (*R*)-2-((3-methyl-2,3-dihydrobenzofuran-3-yl)methyl)-5-phenyl-1,3,4-oxadiazole (**9a**).

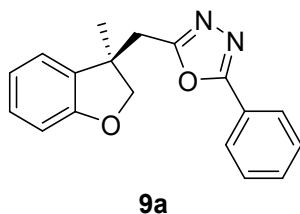

Prepared according to typical procedure B from **8a** (44.0 mg, 0.3 mmol), after a flash column chromatography (hexanes:  $\text{Et}_2\text{O} = 5:1$ ) afforded the product **9a** as a white solid (62.0 mg, 72% yield) with 91% *ee*. Mp: 85-86 °C.  $^1\text{H}$  NMR (400 MHz,  $\text{CDCl}_3$ )  $\delta$  7.95-7.93 (m, 2 H), 7.55–7.46 (m, 3 H), 7.21-7.14 (m, 2 H), 6.95-6.80 (m, 2 H), 4.71 (d,  $J = 9.1$  Hz, 1 H), 4.28 (d,  $J = 9.1$  Hz, 1 H), 3.45-2.89 (m, 2 H), 1.52 (s, 3 H).  $^{13}\text{C}$  NMR (101 MHz,  $\text{CDCl}_3$ )  $\delta$  164.90, 164.05, 159.30, 131.69, 128.99, 126.80, 123.80, 122.80, 120.93, 110.14, 81.71, 45.07, 36.15, 24.67. HRMS (EI) calculated for  $[\text{C}_{24}\text{H}_{17}\text{F}_4\text{NO}]^+$ : 292.1212 found: 292.1210. Enantiomeric excess was determined by HPLC with a Chiralpak OJH column (hexanes: 2-propanol = 85:15, 0.5 mL/min, 254 nm); major enantiomer  $t_{\text{r}} = 32.1$  min, minor enantiomer  $t_{\text{r}} = 36.4$  min.  $[\alpha]_{\text{D}}^{20} = -11.5$  ( $c = 0.3$ ,  $\text{CHCl}_3$ ).

7.45 Synthesis of (*R*)-2-(4-methoxyphenyl)-5-((3-methyl-2,3-dihydrobenzofuran-3-yl)methyl)-1,3,4-oxadiazole (**9b**).

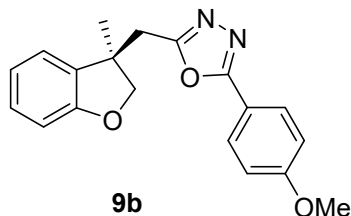

Prepared according to typical procedure B from **8b** (52.4 mg, 0.3 mmol), after a flash column chromatography (hexanes: Et<sub>2</sub>O = 3:1) afforded the product **9b** as a white solid (68.8 mg, 72% yield) with 90% *ee*. Mp: 91-92 °C. <sup>1</sup>H NMR (400 MHz, CDCl<sub>3</sub>) δ 7.80 (dd, *J* = 8.6, 1.6 Hz, 2 H), 7.13-7.07 (m, 2 H), 6.94-6.84 (m, 3 H), 6.75-6.72 (m, 1 H), 4.63 (dd, *J* = 9.1, 1.1 Hz, 1 H), 4.20 (dd, *J* = 9.1, 1.2 Hz, 1 H), 3.80 (d, *J* = 1.8 Hz, 3 H), 3.22-3.04 (m, 2 H), 1.45 (d, *J* = 1.1 Hz, 3 H). <sup>13</sup>C NMR (101 MHz, CDCl<sub>3</sub>) δ 164.89, 163.52, 162.30, 159.34, 133.30, 128.93, 128.53, 122.83, 120.89, 116.28, 114.48, 110.08, 81.71, 55.45, 45.03, 36.09, 24.68. HRMS (EI) calculated for [C<sub>24</sub>H<sub>17</sub>F<sub>4</sub>NO]<sup>+</sup>: 322.1317 found: 322.1314. Enantiomeric excess was determined by HPLC with a Chiralpak ODH column\*2 (hexanes: 2-propanol = 75:25, 0.5 mL/min, 254 nm); minor enantiomer *tr* = 48.8 min, major enantiomer *tr* = 57.6 min. [α]<sub>D</sub><sup>20</sup> = -9.1 (*c* = 0.4, CHCl<sub>3</sub>).

7.46 Synthesis of (*R*)-1-(5-((3-methyl-2,3-dihydrobenzofuran-3-yl)methyl)thiophen-2-yl)ethan-1-one (**9c**).

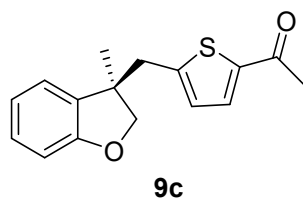

Prepared according to typical procedure B from **8c** (40.2 mg, 0.3 mmol), after a flash column chromatography (hexanes: Et<sub>2</sub>O = 10:1) afforded the product **9c** as a yellow solid (41.4 mg, 52% yield) with 92% *ee*. Mp: 78-79 °C. <sup>1</sup>H NMR (400 MHz, CDCl<sub>3</sub>) δ 7.31 (d, *J* = 5.4 Hz, 1 H), 7.14 (td, *J* = 7.1, 1.5 Hz, 2 H), 7.02 (d, *J* = 5.4 Hz, 1 H), 6.91 (td, *J* = 7.4, 1.0 Hz, 1 H), 6.70 (dd, *J* = 8.4, 1.0 Hz, 1 H), 4.50 (d, *J* = 9.0 Hz, 1 H), 4.14

(d,  $J = 9.0$  Hz, 1 H), 4.05 (d,  $J = 14.1$  Hz, 1 H), 3.21 (d,  $J = 14.1$  Hz, 1 H), 2.47 (s, 3 H), 1.46 (s, 3 H).  $^{13}\text{C}$  NMR (101 MHz,  $\text{CDCl}_3$ )  $\delta$  194.67, 159.99, 148.64, 137.30, 133.83, 128.58, 128.41, 123.27, 123.25, 120.46, 109.66, 81.39, 47.20, 38.49, 30.26, 26.16. HRMS (EI) calculated for  $[\text{C}_{24}\text{H}_{17}\text{F}_4\text{NO}]^+$ : 272.0871 found: 272.0873. Enantiomeric excess was determined by HPLC with a Chiralpak OZ3 column (hexanes: 2-propanol = 95:5, 0.5 mL/min, 254 nm); minor enantiomer  $t_r = 14.9$  min, major enantiomer  $t_r = 16.4$  min.  $[\alpha]_D^{20} = 85.6$  ( $c = 0.3$ ,  $\text{CHCl}_3$ ).

7.47 Synthesis of (*R*)-3-(benzo[*b*]thiophen-2-ylmethyl)-3-methyl-2,3-dihydrobenzofurane (**9d**).

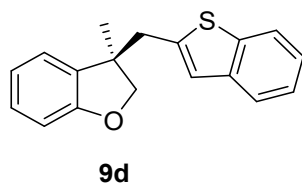

Prepared according to typical procedure from **8d** (120.6 mg, 0.9 mmol), after a flash column chromatography (hexanes:  $\text{Et}_2\text{O} = 20:1$ ) afforded the product **9d** as a yellow solid (64.0 mg, 76% yield) with 90% *ee*. Mp: 62-63 °C  $^1\text{H}$  NMR (400 MHz,  $\text{CDCl}_3$ )  $\delta$  7.79-7.75 (m, 1 H), 7.70-7.61 (m, 1 H), 7.38-7.26 (m, 2 H), 7.21-7.09 (m, 2 H), 7.03-6.92 (m, 2 H), 6.83 (dd,  $J = 8.0, 0.9$  Hz, 1 H), 4.62 (d,  $J = 8.8$  Hz, 1 H), 4.20 (d,  $J = 8.9$  Hz, 1 H), 3.27-3.16 (m, 2 H), 1.50 (s, 3 H).  $^{13}\text{C}$  NMR (101 MHz,  $\text{CDCl}_3$ )  $\delta$  159.66, 140.69, 139.93, 139.76, 134.38, 128.62, 124.19, 123.84, 123.08, 122.97, 122.05, 120.62, 109.93, 81.76, 46.22, 41.62, 25.54. HRMS (EI) calculated for  $[\text{C}_{24}\text{H}_{17}\text{F}_4\text{NO}]^+$ : 280.0922 found: 280.0926. Enantiomeric excess was determined by HPLC with a Chiralpak ODH column\*2 (hexanes: 2-propanol = 95:5, 0.5 mL/min, 254 nm); major enantiomer  $t_r = 27.2$  min, minor enantiomer  $t_r = 28.6$  min.  $[\alpha]_D^{20} = 9.0$  ( $c = 0.3$ ,  $\text{CHCl}_3$ ).

7.48 Synthesis of (*R*)-2-((3-methyl-2,3-dihydrobenzofuran-3-yl)methyl)benzofurane (**9e**).

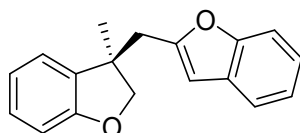

**9e**

Prepared according to typical procedure from **8e** (120.6 mg, 0.9 mmol), after a flash column chromatography (hexanes: Et<sub>2</sub>O = 20:1) afforded the product **9e** as a yellow solid (59.2 mg, 76% yield) with 90% *ee*. <sup>1</sup>H NMR (400 MHz, CDCl<sub>3</sub>) δ 7.50-7.48 (m, 1 H), 7.44-7.41 (m, 1 H), 7.23-7.12 (m, 3 H), 7.09 (dd, J = 7.4, 1.5 Hz, 1 H), 6.92-6.88 (m, 1 H), 6.82 (dd, J = 7.9, 1.0 Hz, 1 H), 6.36 (s, 1 H), 4.68 (dd, J = 8.9, 1.6 Hz, 1 H), 4.20 (dd, J = 8.9, 1.5 Hz, 1 H), 3.14-3.00 (m, 2 H), 1.43 (d, J = 1.5 Hz, 3 H). <sup>13</sup>C NMR (101 MHz, CDCl<sub>3</sub>) δ 159.39, 155.63, 154.81, 134.65, 128.47, 123.57, 122.86, 122.62, 120.61, 120.48, 110.93, 109.88, 104.94, 82.23, 45.74, 39.16, 24.93. HRMS (EI) calculated for [C<sub>24</sub>H<sub>17</sub>F<sub>4</sub>NO]<sup>+</sup>: 264.1150 found: 264.1153. Enantiomeric excess was determined by HPLC with a Chiralpak ODH column (hexanes: 2-propanol = 99:1, 0.5 mL/min, 254 nm); major enantiomer tr = 16.4 min, minor enantiomer tr = 17.8 min. [α]<sub>D</sub><sup>20</sup> = 3.7 (c = 0.3, CHCl<sub>3</sub>).

## 8. General Procedure for the Synthesis of products 8-14

8.1 Synthesis of (*R*)-3-(3-iodopropyl)-3-((perfluorophenyl)methyl)-2,3-dihydrobenzofuran (**8**)<sup>1</sup>.

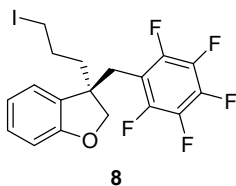

**8**

**3i** (112.8 mg, 0.3 mmol) and CuSO<sub>4</sub> (48 mg, 0.3 mmol, 1.0 equiv) were suspended in acetone (0.5 mL). The reaction mixture was stirred under **3i** (112.8 mg, 0.3 mmol) and NaI (225.0 mg, 1.5 mmol, 5.0 equiv) were suspended in acetone (1.2 mL) and the reaction mixture was stirred under 80°C for 10 h. The solvent was removed under reduced pressure and the residue was purified by flash column chromatography (hexanes: Et<sub>2</sub>O = 40:1) to provide analytical pure product **8** as colorless liquid (100 mg, 97% yield) with 92% *ee*. <sup>1</sup>H NMR (400 MHz, CDCl<sub>3</sub>) δ 7.15 (td, J = 7.7, 1.4 Hz, 1 H),

6.98 (d,  $J = 7.4$  Hz, 1 H), 6.88 (t,  $J = 7.4$  Hz, 1 H), 6.73 (d,  $J = 8.0$  Hz, 1 H), 4.44 (d,  $J = 9.3$  Hz, 1 H), 4.26 (d,  $J = 9.3$  Hz, 1 H), 3.26–3.01 (m, 4 H), 1.93–1.83 (m, 3 H), 1.68–1.56 (m, 1 H).  $^{13}\text{C}$  NMR (101 MHz,  $\text{CDCl}_3$ )  $\delta$  159.76, 146.68, 144.24, 141.26, 138.77, 136.11, 130.46, 129.17, 123.41, 120.77, 110.98 (tm,  $J_{\text{F}} = 38.4$  Hz), 109.87, 79.56 (d,  $J_{\text{F}} = 3.2$  Hz), 49.89, 38.34, 31.89, 28.53, 6.27.  $^{19}\text{F}$  NMR (376 MHz,  $\text{CDCl}_3$ )  $\delta$  -139.81 (dd,  $J = 23.2, 8.2$  Hz), -155.45 (t,  $J = 21.0$  Hz), -162.11 (td,  $J = 22.1, 7.7$  Hz). HRMS (EI) calculated for  $[\text{C}_{18}\text{H}_{14}\text{F}_5\text{IO}]^+$ : 468.0004 found: 467.9992. Enantiomeric excess was determined by HPLC with a Chiralpak ODH column (hexanes: 2-propanol = 98:2, 0.5 mL/min, 210 nm); minor enantiomer  $t_r = 17.7$  min, major enantiomer  $t_r = 20.4$  min.  $[\alpha]_{\text{D}}^{20} = 12.5$  ( $c = 0.5$ ,  $\text{CHCl}_3$ ).

8.2 Synthesis of (*R*)-3-(3-((perfluorophenyl)methyl)-2,3-dihydrobenzofuran-3-yl)propan-1-ol (**9**)<sup>2</sup>.

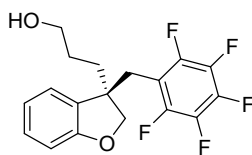

**9**

**3i** (112.8 mg, 0.3 mmol) and  $\text{CuSO}_4$  (48 mg, 0.3 mmol, 1.0 equiv) were suspended in  $\text{H}_2\text{O}$  (0.35 mL) and DMSO (0.8 mL). The reaction mixture was stirred under  $100^\circ\text{C}$  for 72 h and extracted with EA. The combined organic phases were washed with brine, dried over anhydrous  $\text{Na}_2\text{SO}_4$ , and concentrated at the reduced pressure. The residue was purified by flash silica gel column chromatography (hexanes:  $\text{Et}_2\text{O} = 3:1$ ) to provide analytical pure product **9** as colorless liquid (62 mg, 58% yield) with 89% *ee*.  $^1\text{H}$  NMR (400 MHz,  $\text{CDCl}_3$ )  $\delta$  7.13 (t,  $J = 7.7$  Hz, 1 H), 6.97 (d,  $J = 7.4$  Hz, 1 H), 6.86 (t,  $J = 7.4$  Hz, 1 H), 6.72 (d,  $J = 8.0$  Hz, 1 H), 4.44 (d,  $J = 9.2$  Hz, 1 H), 4.28 (d,  $J = 9.2$  Hz, 1 H), 3.63–3.59 (m, 2 H), 3.13–3.01 (m, 2 H), 1.86–1.76 (m, 2 H), 1.73–1.58 (m, 1 H), 1.42–1.32 (m, 2 H).  $^{13}\text{C}$  NMR (101 MHz,  $\text{CDCl}_3$ )  $\delta$  159.81, 146.68, 144.25, 141.20, 138.71, 130.89, 128.99, 123.42, 120.67, 111.20 (tm,  $J_{\text{F}} = 38$  Hz), 109.76, 79.64 (t,  $J_{\text{F}} = 2.9$  Hz), 62.82, 50.06, 33.64, 31.82, 27.79.  $^{19}\text{F}$  NMR (376 MHz,  $\text{CDCl}_3$ )  $\delta$  -139.87 (dd,  $J = 23.0, 8.2$  Hz), -155.74 (t,  $J = 21.0$  Hz), -162.28 (td,  $J = 22.5, 7.9$  Hz). HRMS (EI)



calculated for  $[C_{18}H_{15}F_5O]^+$ : 358.0987 found: 358.0989. Enantiomeric excess was determined by HPLC with a Chiralpak OJH column (hexanes: 2-propanol = 80:20, 0.5 mL/min, 210 nm); minor enantiomer  $t_r$  = 9.1 min, major enantiomer  $t_r$  = 10.3 min.  $[\alpha]_D^{20}$  = 16.6 ( $c$  = 0.5,  $CHCl_3$ ).

### 8.3 Synthesis of (*R*)-3-(3-chloropropyl)-3-(2,3,5,6-tetrafluoro-4-(phenylthio)benzyl)-2,3-dihydrobenzofuran (**10**)<sup>1</sup>.

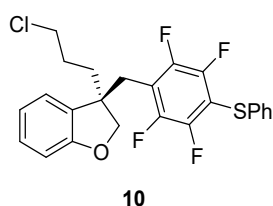

**3i** (75.2 mg, 0.2 mmol, 1.0 equiv) and NaSPh (31.7 mg, 0.24 mmol, 1.2 equiv) were suspended in acetone (1 mL). The reaction mixture was stirred under 80°C for 8 h. After the indicated time the reaction mixture was quenched with water and extracted with EA. The combined organic phases were washed with brine, dried over anhydrous  $Na_2SO_4$ , and concentrated at the reduced pressure. The residue was purified by flash silica gel column chromatography (hexanes:  $Et_2O$  = 30:1) to provide analytical pure product **10** as colorless liquid (65.9 mg, 71% yield) with 92% *ee*.  $^1H$  NMR (400 MHz,  $CDCl_3$ )  $\delta$  7.33–7.21 (m, 5 H), 7.15 (t,  $J$  = 7.7 Hz, 1 H), 7.00 (d,  $J$  = 7.4 Hz, 1 H), 6.87 (t,  $J$  = 7.4 Hz, 1 H), 6.73 (d,  $J$  = 8.0 Hz, 1 H), 4.50 (d,  $J$  = 9.3 Hz, 1 H), 4.28 (d,  $J$  = 9.4 Hz, 1 H), 3.50 (t,  $J$  = 6.1 Hz, 2 H), 3.19–3.08 (m, 2 H), 1.97–1.80 (m, 3 H), 1.63–1.57 (m, 1 H).  $^{13}C$  NMR (101 MHz,  $CDCl_3$ )  $\delta$  159.80, 148.06 (dm,  $J_F$  = 14.9 Hz), 146.68, 145.60 (dm,  $J_F$  = 14.5 Hz), 144.29, 133.30, 130.59, 130.15, 129.32, 129.13, 127.66, 123.46, 120.75, 117.77 (t,  $J_F$  = 39.4 Hz), 112.25 (tm,  $J_F$  = 38.0 Hz), 109.81, 79.70 (t,  $J_F$  = 3.1 Hz), 50.16, 44.98, 34.87, 32.54, 27.84.  $^{19}F$  NMR (376 MHz,  $CDCl_3$ )  $\delta$  -133.24 – -133.38 (m), -139.14 (dd,  $J$  = 24.3, 12.0 Hz). HRMS (ESI) calculated for  $[M+H]^+$  =  $[C_{24}H_{20}ClF_4OS]^+$ : 467.0855 found: 467.0916. Enantiomeric excess was determined by HPLC with a Chiralpak OZ3 column (hexanes: 2-propanol = 99:1, 0.5 mL/min, 210 nm); minor enantiomer  $t_r$  = 18.0 min, major enantiomer  $t_r$  = 21.7 min.  $[\alpha]_D^{20}$  = 24.5 ( $c$  = 0.3,  $CHCl_3$ ).

8.4 Synthesis of (*R*)-3-(3-(phenylthio)propyl)-3-(2,3,5,6-tetrafluoro-4-(phenylthio)benzyl)-2,3-dihydrobenzofuran (**11**)<sup>1</sup>.

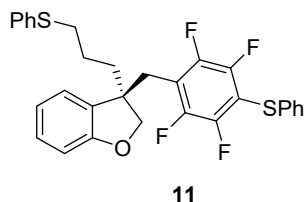

**3i** (75.2 mg, 0.2 mmol, 1.0 equiv) and NaSPh (79.2 mg, 0.6 mmol, 3.0 equiv) were suspended in acetone (1 mL). The reaction mixture was stirred under 80°C for 24 h. After the indicated time the reaction mixture was quenched with water and extracted with EA. The combined organic phases were washed with brine, dried over anhydrous Na<sub>2</sub>SO<sub>4</sub>, and concentrated at the reduced pressure. The residue was purified by flash silica gel column chromatography (hexanes: Et<sub>2</sub>O = 30:1) to provide analytical pure product **11** as colorless liquid (87.2 mg, 81% yield) with 92% *ee*. <sup>1</sup>H NMR (400 MHz, CDCl<sub>3</sub>) δ 7.33–7.24 (m, 9 H), 7.21–7.11 (m, 2 H), 6.94 (d, *J* = 7.4 Hz, 1 H), 6.84 (td, *J* = 7.5, 1.1 Hz, 1 H), 6.72 (d, *J* = 8.0 Hz, 1 H), 4.46 (d, *J* = 9.3 Hz, 1 H), 4.23 (d, *J* = 9.3 Hz, 1 H), 3.16–3.04 (m, 2 H), 2.95–2.84 (m, 2 H), 1.91 (dt, *J* = 10.2, 4.7 Hz, 2 H), 1.79–1.70 (m, 1 H), 1.56–1.43 (m, 1 H). <sup>13</sup>C NMR (101 MHz, CDCl<sub>3</sub>) δ 159.78, 148.06 (dm, *J*<sub>F</sub> = 18.8 Hz), 146.70, 145.59 (dm, *J*<sub>F</sub> = 15.2 Hz), 144.24, 136.23, 133.38, 130.83, 130.10, 129.33, 129.29, 129.01, 128.94, 127.64, 126.07, 123.47, 120.67, 117.96 (t, *J*<sub>F</sub> = 39.4 Hz), 111.97 (d, *J*<sub>F</sub> = 20.2 Hz), 109.73, 79.79 (t, *J*<sub>F</sub> = 2.9 Hz), 50.39, 36.37, 34.04, 32.50, 24.24. <sup>19</sup>F NMR (376 MHz, CDCl<sub>3</sub>) δ -133.31 – -133.40 (m), -139.12 (dd, *J* = 24.4, 12.2 Hz). HRMS (ESI) calculated for [M+H]<sup>+</sup> = [C<sub>30</sub>H<sub>25</sub>F<sub>4</sub>OS<sub>2</sub>]<sup>+</sup>: 541.1278 found: 541.1610. Enantiomeric excess was determined by HPLC with a Chiralpak ID column (hexanes: 2-propanol = 99:1, 0.5 mL/min, 210 nm); minor enantiomer *tr* = 19.1 min, major enantiomer *tr* = 20.5 min. [α]<sub>D</sub><sup>20</sup> = 7.7 (*c* = 0.5, CHCl<sub>3</sub>).

8.5 Synthesis of (*R*)-1-(4-((3-(3-chloropropyl)-2,3-dihydrobenzofuran-3-yl)methyl)-2,3,5,6-tetrafluorophenyl)-1H-indole (**12**)<sup>4</sup>.

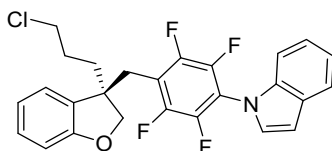

12

Under nitrogen atmosphere, **3i** (75.2 mg, 0.2 mmol, 1.0 equiv), indole (46.8 mg, 0.4 mmol, 2.0 equiv), NaOH (16 mg, 0.4 mmol) and DMF (2 mL) were added to a Schlenk flask. The reaction mixture was stirred under 70°C for 24 h. After the indicated time the reaction mixture was quenched with water and extracted with EA. The combined organic phases were washed with brine, dried over anhydrous Na<sub>2</sub>SO<sub>4</sub>, and concentrated at the reduced pressure. The residue was purified by flash silica gel column chromatography (hexanes: Et<sub>2</sub>O = 30:1) to provide analytical pure product **12** as yellow liquid (74.8 mg, 79% yield) with 90% *ee*. <sup>1</sup>H NMR (400 MHz, CDCl<sub>3</sub>) δ 7.71 (d, *J* = 7.7 Hz, 1 H), 7.29–7.27 (m, 1 H), 7.24–7.18 (m, 3 H), 7.11 (dd, *J* = 12.7, 7.8 Hz, 2 H), 6.96–6.90 (m, 1 H), 6.80–6.78 (m, 2 H), 4.56 (d, *J* = 9.3 Hz, 1 H), 4.35 (d, *J* = 9.3 Hz, 1 H), 3.54 (t, *J* = 6.2 Hz, 2 H), 3.22 (q, *J* = 13.6 Hz, 2 H), 2.05–1.85 (m, 3 H), 1.70–1.61 (m, 1 H). <sup>13</sup>C NMR (101 MHz, CDCl<sub>3</sub>) δ 159.80, 146.92, 144.50, 143.83 (dm, *J*<sub>F</sub> = 17.2 Hz), 141.32 (dm, *J*<sub>F</sub> = 16.2 Hz), 136.21, 130.52, 129.17, 128.65, 128.17, 123.46, 123.07, 121.19, 121.17, 120.82, 120.79, 115.48 (t, *J*<sub>F</sub> = 38.2 Hz), 110.38, 109.83, 105.44, 79.57, 50.16, 44.95, 34.94, 32.36, 27.81. <sup>19</sup>F NMR (376 MHz, CDCl<sub>3</sub>) δ -139.24, -146.45 (dt, *J* = 23.6, 11.1 Hz). HRMS (EI) calculated for [C<sub>26</sub>H<sub>20</sub>ClF<sub>4</sub>NO]<sup>+</sup>: 473.1164 found: 473.1162. Enantiomeric excess was determined by HPLC with a Chiralpak IG column (hexanes: 2-propanol = 99:1, 0.5 mL/min, 210 nm); major enantiomer *tr* = 26.2 min, minor enantiomer *tr* = 28.8 min. [α]<sub>D</sub><sup>20</sup> = 20.7 (*c* = 0.5, CHCl<sub>3</sub>).

8.6 Synthesis of diphenyl (*R*)-(4-((3-(3-chloropropyl)-2,3-dihydrobenzofuran-3-yl)methyl)-2,3,5,6-tetrafluorophenyl)phosphonate<sup>5</sup>.

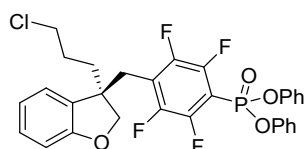

13

Under nitrogen atmosphere, dimethyl phosphite (70.2 mg, 0.3 mmol, 1.0 equiv), Cs<sub>2</sub>CO<sub>3</sub> (293.4 mg, 0.9 mmol), tetrabutylammonium iodide (333 mg, 0.9 mmol) and DMF (2 mL) were added to a Schlenk flask. The reaction mixture was stirred for 1 h at room temperature. After this time period, **3i** (135.4 mg, 0.3 mmol, 1.0 equiv) in DMF (1 mL) was added and stirred for an additional 48 h. The reaction mixture was quenched with water and extracted with EA. The combined organic phases were washed with brine, dried over anhydrous Na<sub>2</sub>SO<sub>4</sub>, and concentrated at the reduced pressure. The residue was purified by flash silica gel column chromatography (hexanes: Et<sub>2</sub>O = 20:1) to provide analytical pure product **13** as colorless liquid (111.8 mg, 63% yield) with 92% *ee*. <sup>1</sup>H NMR (400 MHz, CDCl<sub>3</sub>) δ 7.36-7.26 (m, 4 H), 7.19–7.10 (m, 2 H), 7.03 (d, *J* = 7.4 Hz, 1 H), 6.97–6.93 (m, 3 H), 6.91–6.86 (m, 3 H), 6.77 (d, *J* = 8.0 Hz, 1 H), 4.55 (d, *J* = 9.3 Hz, 1 H), 4.36 (d, *J* = 9.3 Hz, 1 H), 3.95 (t, *J* = 6.0 Hz, 2 H), 3.21–3.10 (m, 2 H), 2.06–1.85 (m, 3 H), 1.71–1.61 (m, 1 H). <sup>13</sup>C NMR (101 MHz, CDCl<sub>3</sub>) δ 159.87, 158.80, 157.16, 146.93, 144.50 (dm, *J*<sub>F</sub> = 22.2 Hz), 142.64 (dm, *J*<sub>F</sub> = 14.2 Hz), 139.99, 130.95, 129.76, 129.43, 128.96, 123.63, 123.53, 120.71, 120.64, 115.43, 114.43, 112.33 (t, *J*<sub>F</sub> = 38.5 Hz), 109.68, 79.85 (d, *J*<sub>F</sub> = 3.0 Hz), 67.59, 50.20, 33.88, 32.00, 24.68. <sup>19</sup>F NMR (376 MHz, CDCl<sub>3</sub>) δ -140.34 (dd, *J* = 22.4, 9.3 Hz), -154.61 – -154.71 (m). <sup>31</sup>P NMR (162 MHz, CDCl<sub>3</sub>) δ 31.50. HRMS (ESI) calculated for [M+H]<sup>+</sup> = [C<sub>30</sub>H<sub>25</sub>ClF<sub>4</sub>O<sub>4</sub>P]<sup>+</sup>: 591.1110 found: 591.1347. Enantiomeric excess was determined by HPLC with a Chiralpak OZ3 column (hexanes: 2-propanol = 98:2, 0.5 mL/min, 210 nm); major enantiomer *tr* = 15.0 min, minor enantiomer *tr* = 15.9 min. [α]<sub>D</sub><sup>20</sup> = 22.5 (*c* = 0.5, CHCl<sub>3</sub>).

8.7 Synthesis of (*R*)-3-allyl-3-(4-(*tert*-butoxy)-2,3,5,6-tetrafluorobenzyl)-2,3-dihydrobenzofuran (**14**)<sup>6</sup>.

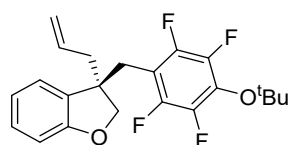

**14**

Under nitrogen atmosphere, **3i** (112.8 mg, 0.3 mmol, 1.0 equiv), <sup>t</sup>BuOK (67.3 mg, 0.6 mmol), 18-crown-6 (39.6 mg, 0.15 mmol) and Et<sub>2</sub>O (3 mL) were added to a Schlenk flask. The reaction mixture was stirred under 60°C for 24 h. After the indicated time the reaction mixture was quenched with water and extracted with EA. The combined organic phases were washed with brine, dried over anhydrous Na<sub>2</sub>SO<sub>4</sub>, and concentrated at the reduced pressure. The residue was purified by flash silica gel column chromatography (hexanes: Et<sub>2</sub>O = 20:1) to provide analytical pure product **14** as colorless liquid (118.2 mg, 84% yield) with 88% *ee*. <sup>1</sup>H NMR (400 MHz, CDCl<sub>3</sub>) δ 7.12 (td, J = 7.7, 1.4 Hz, 1 H), 6.99 (d, J = 7.4 Hz, 1 H), 6.85 (td, J = 7.4, 1.1 Hz, 1 H), 6.70 (d, J = 8.0 Hz, 1 H), 5.73-5.63 (m, 1 H), 5.14 – 5.08 (m, 2 H), 4.45 (d, J = 9.2 Hz, 1 H), 4.32 (d, J = 9.2 Hz, 1 H), 3.12-3.02 (m, 2 H), 2.61 – 2.47 (m, 2 H), 1.38 (t, J = 1.2 Hz, 9 H). <sup>13</sup>C NMR (101 MHz, CDCl<sub>3</sub>) δ 159.90, 146.74, 144.38 (dm, J<sub>F</sub> = 13.4 Hz), 141.85 (dm, J<sub>F</sub> = 18.2 Hz), 133.31, 131.08, 128.83, 123.58, 120.45, 118.97, 110.97 (t, J<sub>F</sub> = 18.9 Hz), 109.56, 84.74, 79.52, 50.04, 41.89, 31.90, 28.32. <sup>19</sup>F NMR (376 MHz, CDCl<sub>3</sub>) δ -142.17 (dd, J = 22.9, 9.0 Hz), -152.18 (dd, J = 23.0, 9.1 Hz). HRMS (ESI) calculated for [M+H]<sup>+</sup> = [C<sub>22</sub>H<sub>23</sub>F<sub>4</sub>O<sub>2</sub>]<sup>+</sup>: 395.1629 found: 395.1274. Enantiomeric excess was determined by HPLC with a Chiralpak OZ3 column (hexanes: 2-propanol = 99:1, 0.3 mL/min, 210 nm); minor enantiomer tr = 16.1 min, major enantiomer tr = 17.4 min. [α]<sub>D</sub><sup>20</sup> = -10.1 (c = 0.5, CHCl<sub>3</sub>).

## 9. Non-linear effect experiments <sup>8</sup>

Non-linear effect reactions were set up with standard substrates (0.1 mmol), catalyst and *N*-Me-Xu3 with varied *ee* following the standard procedure as described in previous section. In this case, the amount of palladium precatalyst and *N*-Me-Xu3 enantiomers was weighed on an analytical balance, and the amount of solvent was measured with volumetric syringe. The reactions were allowed to run for 15 h, purification as described in standard procedure. Each experiment was repeated three times. The relationship between enantiomeric excess of *N*-Me-Xu3 ligand and product is listed here.

**Table S6.** Non-linear effect experiments

| <b>Ligand<br/><i>ee</i></b> | <b>(<i>S,R</i>)-<i>N</i>-<br/>Me-Xu3<br/>amount<br/>weighed<br/>(mg)</b> | <b>(<i>R,S</i>)-<i>N</i>-<br/>Me-Xu3<br/>amount<br/>weighed<br/>(mg)</b> | <b>Product<br/>first <i>ee</i></b> | <b>Product<br/>second <i>ee</i></b> | <b>Product<br/>third <i>ee</i></b> | <b>Product<br/>average<br/><i>ee</i></b> |
|-----------------------------|--------------------------------------------------------------------------|--------------------------------------------------------------------------|------------------------------------|-------------------------------------|------------------------------------|------------------------------------------|
| 0                           | 6.4                                                                      | 6.4                                                                      | 0.3%                               | 1.0%                                | 1.5%                               | 0.9%                                     |
| 20%                         | 7.7                                                                      | 5.1                                                                      | 20.8%                              | 22.8%                               | 20.0%                              | 21.2%                                    |
| 40%                         | 9.0                                                                      | 3.8                                                                      | 41.8%                              | 37.4%                               | 38.8%                              | 39.3%                                    |
| 60%                         | 10.2                                                                     | 2.6                                                                      | 51.2%                              | 54.4%                               | 56.4%                              | 54.0%                                    |
| 80%                         | 11.5                                                                     | 1.3                                                                      | 71.4%                              | 73.2%                               | 70.8%                              | 71.8%                                    |
| 100%                        | 12.8                                                                     | 0                                                                        | 91.4%                              | 92.0%                               | 91.2%                              | 91.5%                                    |

## 10. Kinetic Data: Order in Catalyst

**General procedure:** Catalyst was measured from a stock solution (64.7 mg Pd<sub>2</sub>(dba)<sub>3</sub> and 159.5 mg **Xu4** dissolved in 5 mL <sup>i</sup>Pr<sub>2</sub>O using a Hamilton gastight syringe into 10 mL oven-dried sealed tube. Solvent was removed under reduced pressure, to the oven-dried sealed tube containing the resulting solid was added substrate **1a** (27.4 mg, 0.10 mmol, 1.0 equiv.), Cs<sub>2</sub>CO<sub>3</sub> (65.2 mg, 0.2 mmol, 2.0 equiv.), Ag<sub>2</sub>CO<sub>3</sub> (20.5 mg, 0.075 mmol, 0.75 equiv.). The flask was evacuated and refilled with argon. Then, **2a** (50.4 mg, 0.30 mmol, 3.0 equiv.), 1,3-dimethoxybenzene (13.8 mg, 0.10 mmol, 1.0 equiv.), <sup>i</sup>Pr<sub>2</sub>O (1 mL) was added to the tube. The tube was tightly sealed with a Teflon-lined screw cap and heated to 80 °C in a preheated aluminum heating block. After the desired reaction time (measured precisely by a timer), the reaction was flash-cooled in a liquid nitrogen bath until frozen solid (about 45 s). The reaction was then allowed to warm back up to room temperature and analyzed by GC. Yields and concentrations of **3a** are reported as averages of two independent vial reactions. The concentrations of **3a** were used to obtain initial rates and the rates were then plotted as a function of concentration of the varied catalyst.

**Table S7.** Amounts of catalyst and results used to determine the order in catalyst

| Entry | Concentration of catalyst                            | Reaction time (min) | Average Yield (%) | <b>3a</b> (mM) |
|-------|------------------------------------------------------|---------------------|-------------------|----------------|
| 1     | 100 $\mu$ L of stock solution = 2.5 mol%,<br>12.5 mM | 30                  | 2.9               | 2.9            |
| 2     |                                                      | 60                  | 4.9               | 4.9            |
| 3     |                                                      | 90                  | 6.4               | 6.4            |
| 4     |                                                      | 120                 | 8.1               | 8.1            |
| 5     |                                                      | 180                 | 10.9              | 10.9           |
| 6     | 200 $\mu$ L of stock solution = 5.0 mol%,<br>25 mM   | 25                  | 3.1               | 3.1            |
| 7     |                                                      | 35                  | 3.9               | 3.9            |
| 8     |                                                      | 45                  | 5.0               | 5.0            |
| 9     |                                                      | 55                  | 6.3               | 6.3            |

|    |                                                         |    |      |      |
|----|---------------------------------------------------------|----|------|------|
| 10 |                                                         | 65 | 7.2  | 7.2  |
| 11 | 300 $\mu$ L of stock<br>solution = 7.5 mol%,<br>37.5 mM | 25 | 3.6  | 3.6  |
| 12 |                                                         | 35 | 4.7  | 4.7  |
| 13 |                                                         | 45 | 7.3  | 7.3  |
| 14 |                                                         | 55 | 8.3  | 8.3  |
| 15 |                                                         | 65 | 9.6  | 9.6  |
| 16 | 400 $\mu$ L of stock<br>solution = 10.0 mol%,<br>50 mM  | 15 | 3.2  | 3.2  |
| 17 |                                                         | 25 | 4.2  | 4.2  |
| 18 |                                                         | 35 | 7.4  | 7.4  |
| 19 |                                                         | 55 | 11.6 | 11.6 |
| 20 |                                                         | 65 | 13.6 | 13.6 |

**Figure S1.** Plot of **3a** (mM) verse time (min) using different concentrations of catalyst

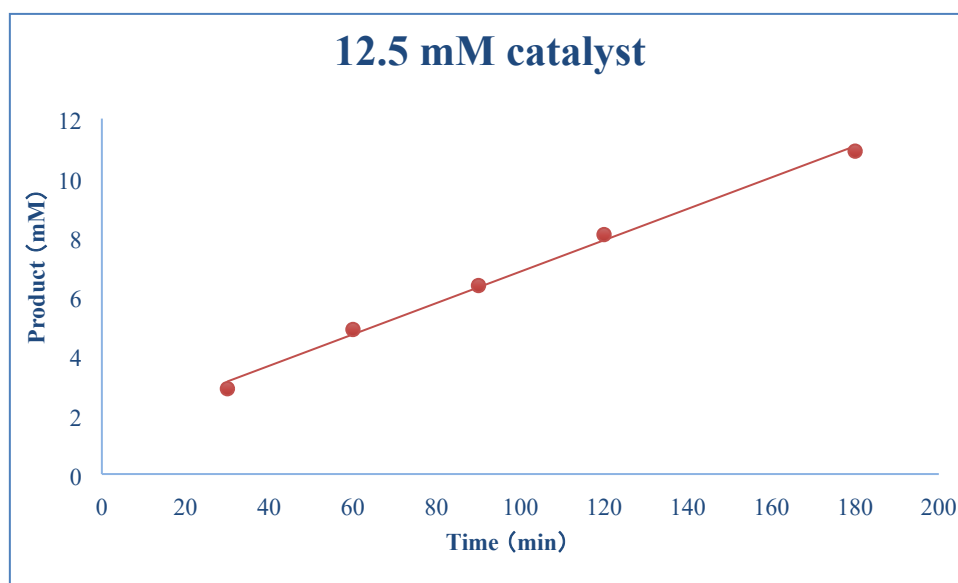



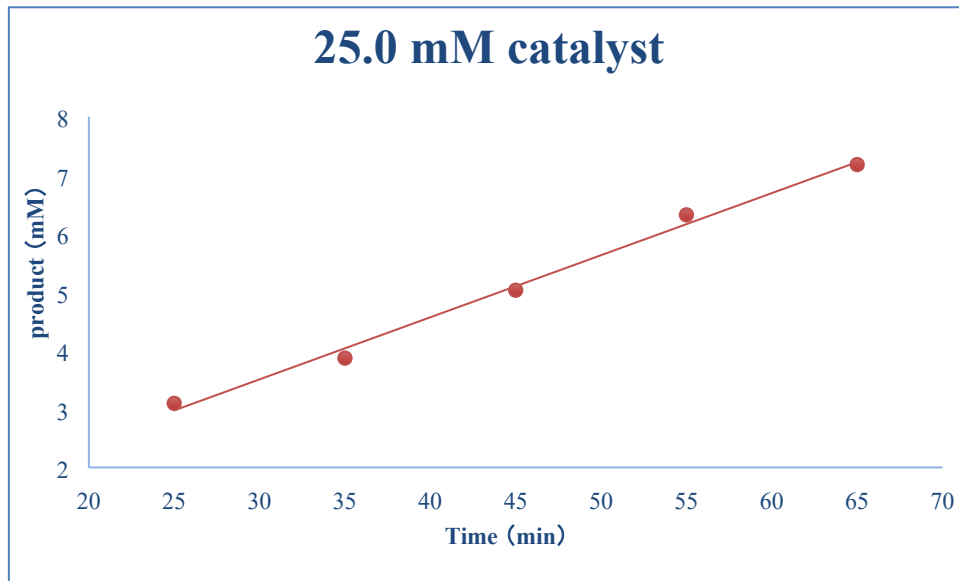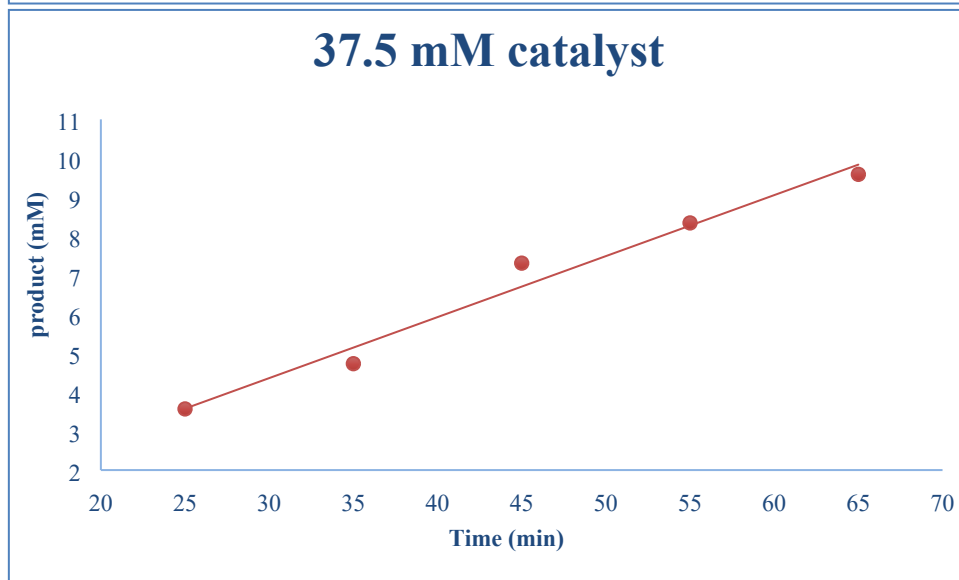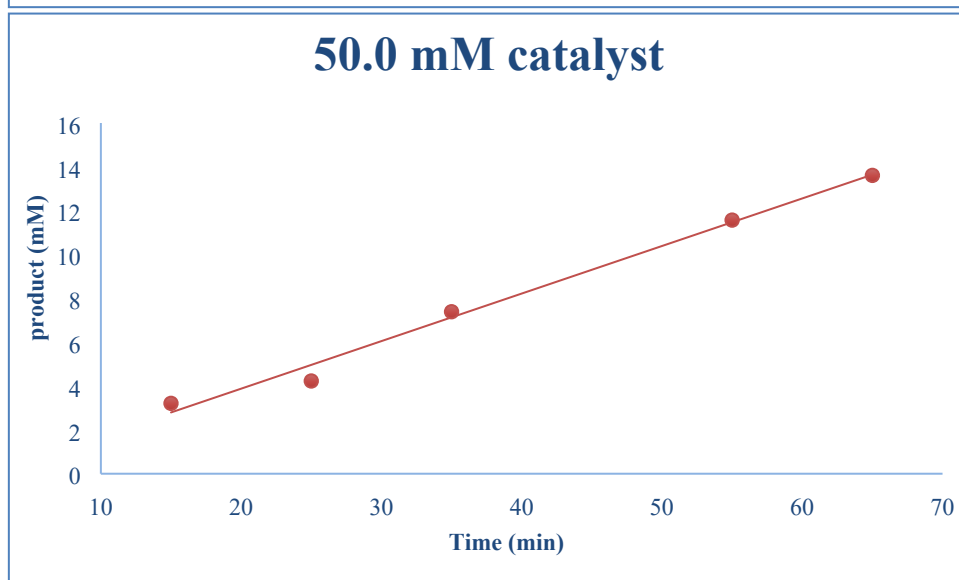

**Table S8.** Rates determined while varying the concentrations of catalyst

| Entry | Concentration of catalyst (mM) | Rate (mM/min) |
|-------|--------------------------------|---------------|
| 1     | 12.5                           | 0.053         |
| 2     | 25.0                           | 0.1062        |
| 3     | 37.5                           | 0.1565        |
| 4     | 50.0                           | 0.217         |

**Figure S2.** Rates determined while varying the concentrations of catalyst.

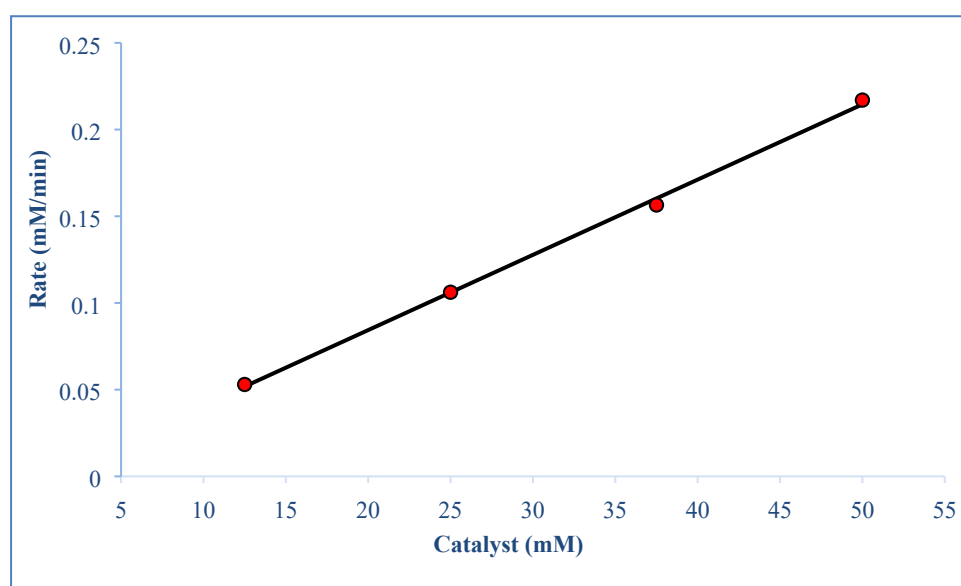

## 11. Kinetic Data: Deuterium Kinetic Isotope Experiment <sup>9</sup>

### Side-by- side reaction

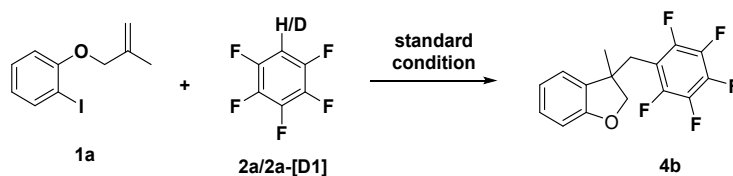

**General procedure:** Catalyst was measured from a stock solution (103.5 mg Pd<sub>2</sub>(dba)<sub>3</sub>•CHCl<sub>3</sub> and 255.2 mg N-CD<sub>3</sub>-**Xu4** dissolved in 2.0 mL <sup>i</sup>Pr<sub>2</sub>O) using a Hamilton gastight syringe into 10 mL oven-dried sealed tube. Solvent was removed under reduced pressure, to the oven-dried sealed tube containing the resulting solid was

added substrate **1a** (27.4 mg, 0.10 mmol, 1.0 equiv.), Cs<sub>2</sub>CO<sub>3</sub> (65.2 mg, 0.2 mmol, 2.0 equiv.), Ag<sub>2</sub>CO<sub>3</sub> (20.5 mg, 0.075 mmol, 0.75 equiv.). The flask was evacuated and refilled with argon. Then, **2a** (50.4 mg, 0.30 mmol, 3.0 equiv.) or **2a-[D1]** (50.7 mg, 0.30 mmol, 3.0 equiv.), <sup>i</sup>Pr<sub>2</sub>O (1 mL) was added to the tube. The tube was tightly sealed with a Teflon-lined screw cap and heated to 80 °C in a preheated aluminum heating block. After the desired reaction time (measured precisely by a timer), the reaction was flash-cooled in a liquid nitrogen bath until frozen solid (about 45 s). The reaction was then allowed to warm back up to room temperature and analyzed by NMR. Yields and concentrations of **4a** are reported as averages of two independent vial reactions. The concentrations of **4a** were used to obtain initial rates and the rates were then plotted as a function of concentration of the varied catalyst.

**Table S9.** Yield(%) verse time (h) using **2a-[D1]** as a substrate.

| Entry | Concentration of catalyst              | Reaction time (h) | Average Yield (%) |
|-------|----------------------------------------|-------------------|-------------------|
| 1     | 100 μL of stock solution =<br>2.5 mol% | 2                 | 7                 |
| 2     |                                        | 4                 | 16                |
| 3     |                                        | 6                 | 25                |
| 4     |                                        | 8                 | 31                |

**Figure S3.** Plot of yield(%) verse time (h) using **2a-[D1]** as a substrate.

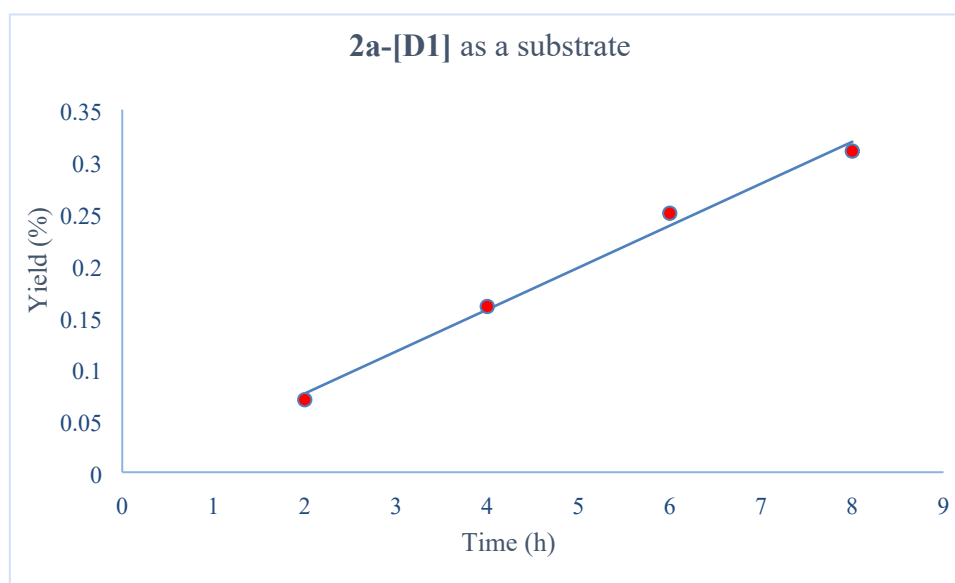

**Table S10.** Yield(%) verse time (h) using **2a** as a substrate.

| Entry | Concentration of catalyst                   | Reaction time (h) | Average Yield (%) |
|-------|---------------------------------------------|-------------------|-------------------|
| 1     | 100 $\mu$ L of stock solution =<br>2.5 mol% | 2                 | 29                |
| 2     |                                             | 4                 | 42                |
| 3     |                                             | 6                 | 59                |
| 4     |                                             | 8                 | 70                |

**Figure S4.** Plot of yield(%) verse time (h) using **2a** as a substrate.

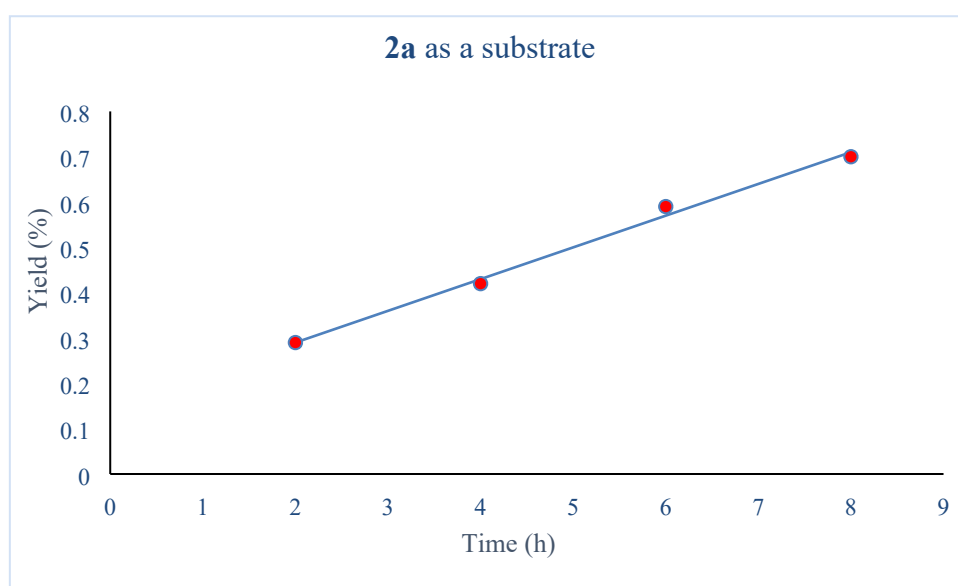

### Intermolecular competition reaction

**General procedure:** The general procedure for reaction monitoring by  $^{19}\text{F}$  NMR was used, with the use of internal standard  $\alpha,\alpha,\alpha$ -trifluorotoluene (10  $\mu$ L) and using 1.5 equiv of both **2a** and **2a-[D1]**. The KIE value was obtained using the consumption of (**2a** or **2a-[D1]**).

**Table S11.** Intermolecular competition experiments

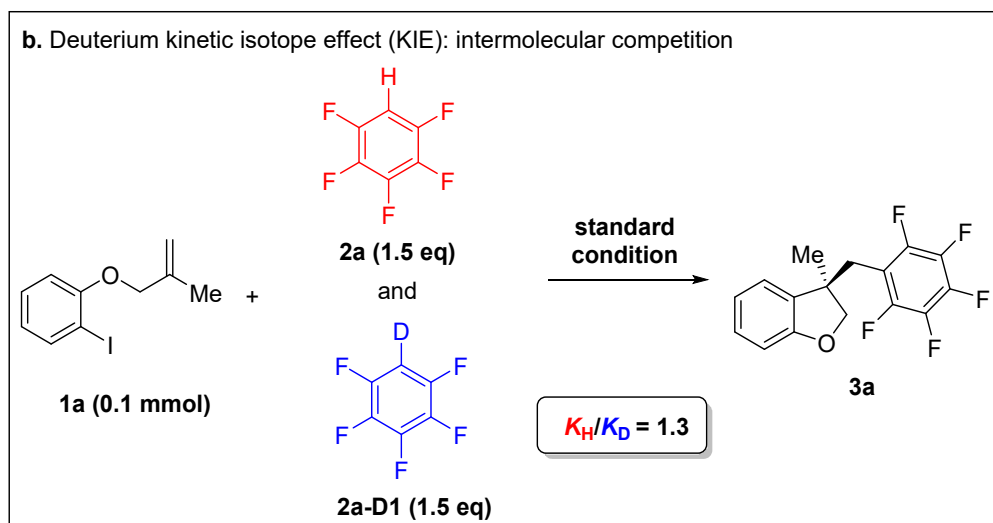

**Figure S5.** Intermolecular competition reaction monitoring by  $^{19}\text{F}$  NMR.

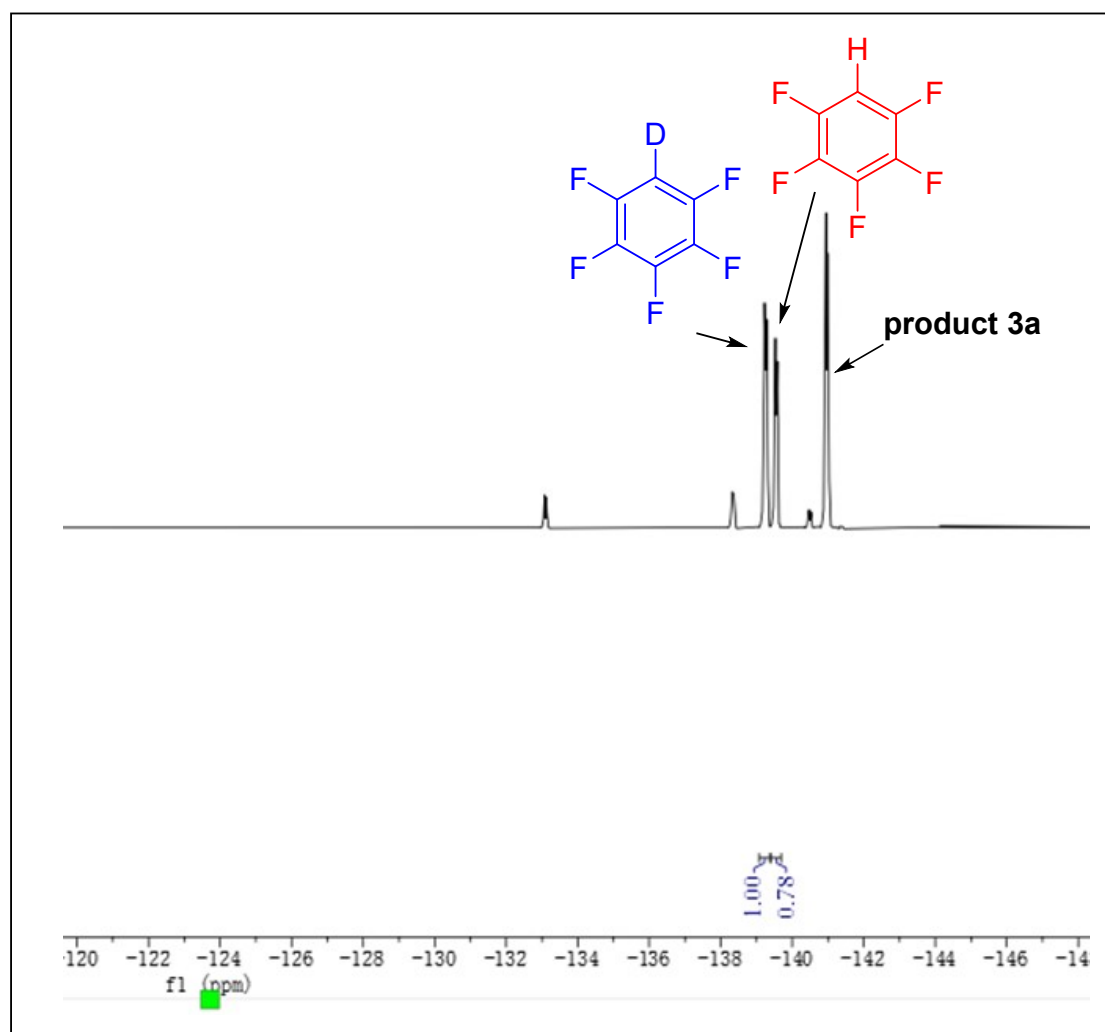

## 12. Control experiments of C<sub>6</sub>F<sub>5</sub>Ag and H/D exchanging control experiments.

**General procedure:** To a 10 mL oven-dried sealed tube was added substrate 1 (0.10 mmol, 1.0 equiv.), Pd<sub>2</sub>(dba)<sub>3</sub>•CHCl<sub>3</sub> (5.2 mg, 0.005 mmol, 5 mol%), Xu4 (12.8 mg, 0.02 mmol, 20 mol%), Cs<sub>2</sub>CO<sub>3</sub> (65.2 mg, 0.2 mmol, 2.0 equiv.), Ag<sub>2</sub>CO<sub>3</sub> (20.5 mg, 0.075 mmol, 0.75 equiv.). The flask was evacuated and refilled with argon. Then, substrate 2 (0.30 mmol, 3.0 equiv.), C<sub>6</sub>D<sub>6</sub> (1 mL) was added to the tube, and stirred at room temperature for 1 h. Then the mixture was stirred at 80 °C for 10 h. The resulting slurry was cooled to room temperature, and a <sup>19</sup>F NMR spectrum was acquired at 25 °C, showing the presence of C<sub>6</sub>F<sub>5</sub>Ag.

**Table S12.** C<sub>6</sub>F<sub>5</sub>Ag species control experiments.

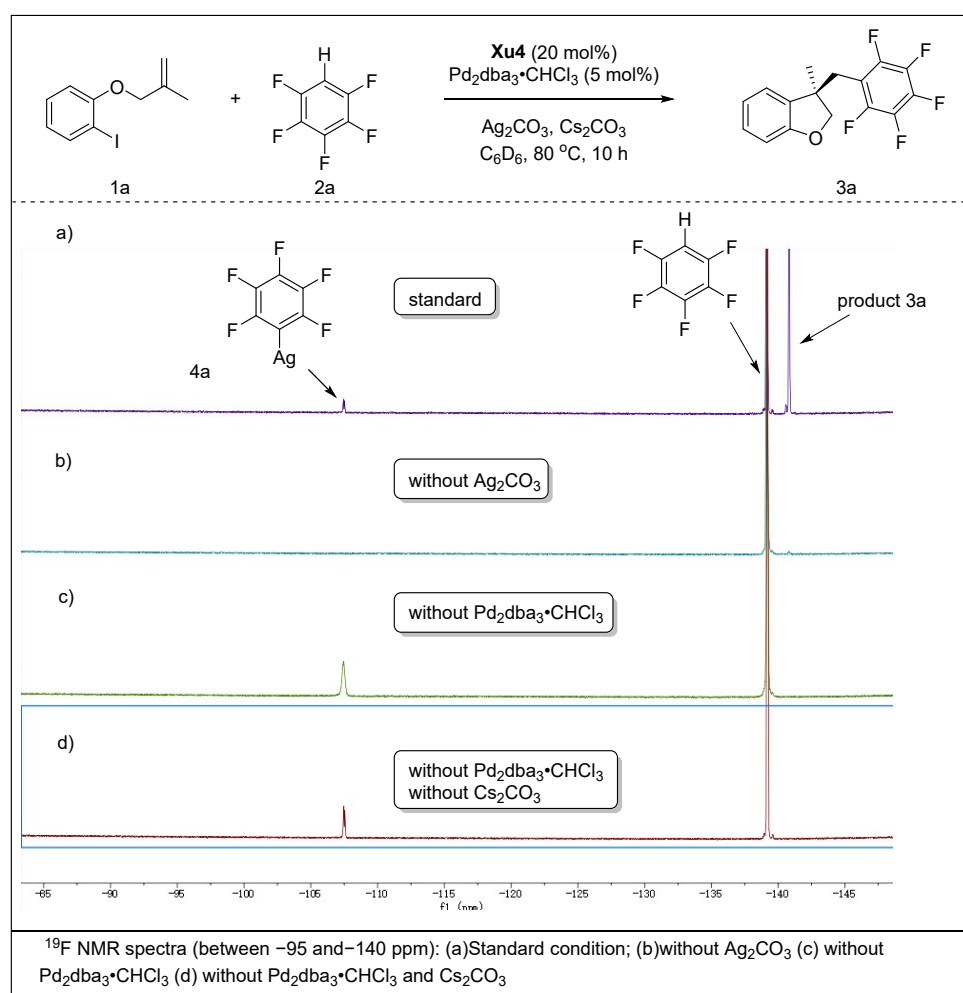

## H/D exchanging control experiments.

**General procedure:** To a 10 mL oven-dried sealed tube was added Pd<sub>2</sub>(dba)<sub>3</sub>•CHCl<sub>3</sub> (5.2 mg, 0.005 mmol, 1.7 mol%), **Xu4** (12.8 mg, 0.02 mmol, 6.7 mol%), Cs<sub>2</sub>CO<sub>3</sub> (65.2 mg, 0.2 mmol, 0.7 equiv.), Ag<sub>2</sub>CO<sub>3</sub> (20.5 mg, 0.075 mmol, 0.25 equiv.). The flask was evacuated and refilled with argon. Then C<sub>6</sub>F<sub>5</sub>H (0.3 mmol, 1.0 eq), <sup>i</sup>Pr<sub>2</sub>O (1 mL) and D<sub>2</sub>O (27 μL, 1.5 mmol, 5 equiv) was added to the tube, and stirred at room temperature for 1 h. Then the mixture was stirred at 80 °C for 10 h. The reaction mixture was cooled to room temperature and filtered through a plug of Celite. Acetone-d<sub>6</sub> (20 μL, 272 μmol) was added as an internal standard. <sup>2</sup>H NMR spectra were acquired at 25 °C to determine the amount of deuterium incorporation.

**Table S13.** H/D exchanging control experiments.

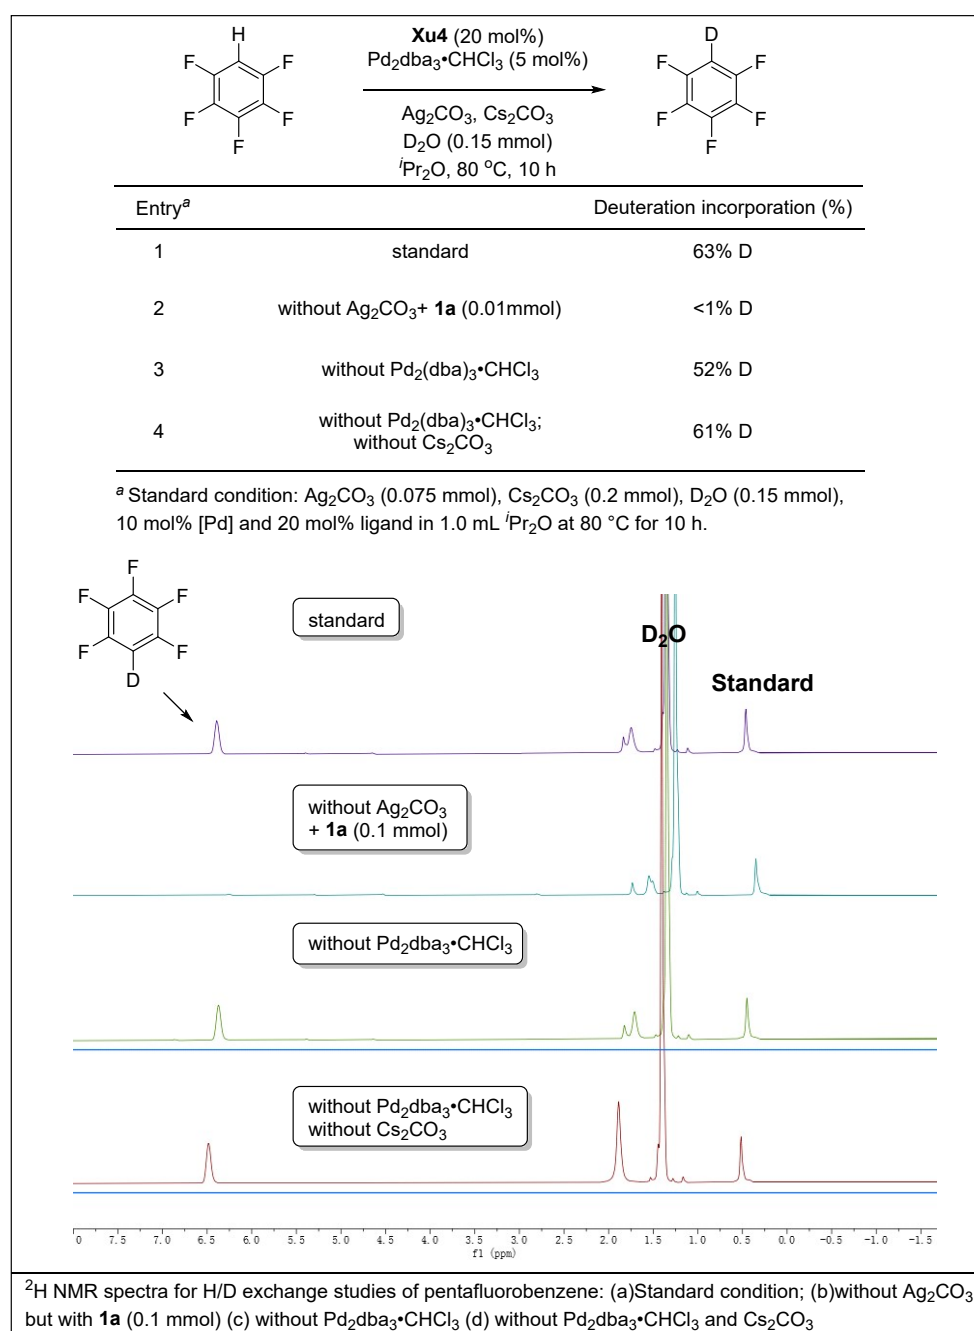

### 13. X-Ray Structure and Crystal Data of 7n

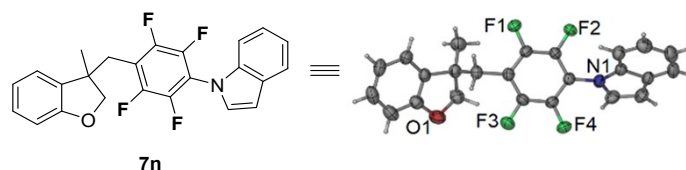

**Table 1 Crystal data and structure refinement for 7n.**

|                                             |                                                               |
|---------------------------------------------|---------------------------------------------------------------|
| Identification code                         | 7n                                                            |
| Empirical formula                           | C <sub>24</sub> H <sub>17</sub> F <sub>4</sub> NO             |
| Formula weight                              | 411.38                                                        |
| Temperature/K                               | 296.3(6)                                                      |
| Crystal system                              | orthorhombic                                                  |
| Space group                                 | P2 <sub>1</sub> 2 <sub>1</sub> 2 <sub>1</sub>                 |
| a/Å                                         | 6.42860(10)                                                   |
| b/Å                                         | 8.7411(2)                                                     |
| c/Å                                         | 33.5094(6)                                                    |
| α/°                                         | 90                                                            |
| β/°                                         | 90                                                            |
| γ/°                                         | 90                                                            |
| Volume/Å <sup>3</sup>                       | 1882.99(6)                                                    |
| Z                                           | 4                                                             |
| ρ <sub>calc</sub> /g/cm <sup>3</sup>        | 1.451                                                         |
| μ/mm <sup>-1</sup>                          | 0.985                                                         |
| F(000)                                      | 848.0                                                         |
| Crystal size/mm <sup>3</sup>                | 0.26 × 0.22 × 0.18                                            |
| Radiation                                   | CuKα (λ = 1.54184)                                            |
| 2Θ range for data collection/°              | 10.46 to 134.134                                              |
| Index ranges                                | -7 ≤ h ≤ 7, -10 ≤ k ≤ 10, -40 ≤ l ≤ 40                        |
| Reflections collected                       | 40249                                                         |
| Independent reflections                     | 3362 [R <sub>int</sub> = 0.0608, R <sub>sigma</sub> = 0.0250] |
| Data/restraints/parameters                  | 3362/0/273                                                    |
| Goodness-of-fit on F <sup>2</sup>           | 1.060                                                         |
| Final R indexes [I ≥ 2σ (I)]                | R <sub>1</sub> = 0.0302, wR <sub>2</sub> = 0.0769             |
| Final R indexes [all data]                  | R <sub>1</sub> = 0.0334, wR <sub>2</sub> = 0.0790             |
| Largest diff. peak/hole / e Å <sup>-3</sup> | 0.10/-0.11                                                    |
| Flack parameter                             | -0.07(7)                                                      |

**Table 2 Fractional Atomic Coordinates (×10<sup>4</sup>) and Equivalent Isotropic Displacement Parameters (Å<sup>2</sup>×10<sup>3</sup>) for 7n. U<sub>eq</sub> is defined as 1/3 of the trace of the orthogonalised U<sub>ij</sub> tensor.**

| Atom | x       | y       | z         | U(eq)   |
|------|---------|---------|-----------|---------|
| F1   | 8260(2) | 3636(2) | 6426.7(4) | 67.4(4) |



|     |         |            |           |         |
|-----|---------|------------|-----------|---------|
| F2  | 7504(2) | 2975.4(18) | 7184.6(4) | 62.7(4) |
| F3  | 1848(2) | 6245.2(18) | 6348.3(4) | 66.8(4) |
| F4  | 1188(2) | 5696.7(19) | 7116.2(4) | 68.3(4) |
| O1  | 1414(3) | 4899(2)    | 5367.6(6) | 69.7(5) |
| N1  | 4000(3) | 4069(2)    | 7586.2(5) | 48.3(4) |
| C1  | 2910(4) | 5304(3)    | 5091.8(7) | 55.0(6) |
| C2  | 2525(5) | 6107(3)    | 4745.9(8) | 69.1(7) |
| C3  | 4199(6) | 6399(3)    | 4503.5(8) | 71.3(8) |
| C4  | 6184(5) | 5924(3)    | 4602.0(7) | 69.6(8) |
| C5  | 6536(4) | 5140(3)    | 4956.3(7) | 60.4(6) |
| C6  | 4861(4) | 4837(3)    | 5201.4(6) | 48.5(5) |
| C7  | 4740(4) | 4103(3)    | 5609.8(6) | 48.2(5) |
| C8  | 2392(4) | 3803(3)    | 5630.0(7) | 57.0(6) |
| C9  | 5456(4) | 5318(3)    | 5920.7(6) | 48.5(5) |
| C10 | 6009(5) | 2641(3)    | 5640.7(8) | 64.8(7) |
| C11 | 5060(3) | 4931(3)    | 6353.1(6) | 46.3(5) |
| C12 | 6455(3) | 4129(3)    | 6587.3(6) | 47.9(5) |
| C13 | 6104(3) | 3809(3)    | 6983.0(6) | 47.6(5) |
| C14 | 4336(3) | 4336(3)    | 7176.4(6) | 45.8(5) |
| C15 | 2920(3) | 5148(3)    | 6947.5(6) | 48.6(5) |
| C16 | 3275(4) | 5421(3)    | 6548.9(6) | 48.4(5) |
| C17 | 2230(4) | 3426(3)    | 7755.4(7) | 56.4(6) |
| C18 | 2404(4) | 3445(3)    | 8155.3(7) | 60.0(6) |
| C19 | 4323(4) | 4163(3)    | 8253.7(6) | 51.1(5) |
| C20 | 5311(5) | 4584(3)    | 8609.1(7) | 64.3(7) |
| C21 | 7158(5) | 5359(3)    | 8593.6(7) | 68.6(7) |
| C22 | 8091(4) | 5715(3)    | 8232.5(8) | 64.9(7) |
| C23 | 7180(4) | 5312(3)    | 7876.0(7) | 54.4(6) |
| C24 | 5305(3) | 4549(3)    | 7892.1(6) | 45.4(5) |

**Table 3 Anisotropic Displacement Parameters ( $\text{\AA}^2 \times 10^3$ ) for 7n. The Anisotropic displacement factor exponent takes the form:  $-2\pi^2[h^2a^{*2}U_{11}+2hka^*b^*U_{12}+\dots]$ .**

| Atom | $U_{11}$ | $U_{22}$  | $U_{33}$ | $U_{23}$ | $U_{13}$  | $U_{12}$  |
|------|----------|-----------|----------|----------|-----------|-----------|
| F1   | 47.6(8)  | 102.2(12) | 52.4(7)  | 0.8(8)   | 7.9(6)    | 15.8(8)   |
| F2   | 55.5(8)  | 83.1(11)  | 49.5(7)  | 5.0(7)   | -5.1(6)   | 21.9(8)   |
| F3   | 72.5(9)  | 71.1(10)  | 56.9(8)  | 5.4(7)   | -6.6(7)   | 25.8(8)   |
| F4   | 59.1(8)  | 86.1(11)  | 59.8(8)  | -2.4(7)  | 10.3(6)   | 24.9(8)   |
| O1   | 51.8(9)  | 79.4(13)  | 78.0(12) | 12.7(10) | -2.7(9)   | 0.7(10)   |
| N1   | 45.6(9)  | 60.3(11)  | 39.1(9)  | 0.8(8)   | 3.6(7)    | -4.2(9)   |
| C1   | 56.8(14) | 53.8(13)  | 54.4(12) | -2.6(11) | -6.1(11)  | -1.4(12)  |
| C2   | 75.8(18) | 65.3(17)  | 66.3(15) | 4.0(13)  | -21.1(15) | 3.0(15)   |
| C3   | 103(2)   | 62.9(17)  | 47.6(13) | 3.4(12)  | -16.0(15) | -5.7(17)  |
| C4   | 88(2)    | 78.0(19)  | 42.4(12) | -2.5(12) | 8.6(13)   | -10.1(18) |

|     |          |          |          |          |           |          |
|-----|----------|----------|----------|----------|-----------|----------|
| C5  | 62.1(14) | 71.5(17) | 47.4(12) | -6.5(11) | 2.9(11)   | 6.1(14)  |
| C6  | 58.6(13) | 46.8(12) | 40.2(10) | -5.4(9)  | -2.9(9)   | 0.9(11)  |
| C7  | 54.5(12) | 45.9(12) | 44.2(11) | -0.9(9)  | -1.2(10)  | -0.4(11) |
| C8  | 57.9(14) | 57.6(15) | 55.5(13) | 0.9(11)  | -3.7(11)  | -6.3(13) |
| C9  | 55.7(13) | 49.2(12) | 40.5(11) | 2.0(9)   | 1.0(9)    | -4.4(11) |
| C10 | 75.7(18) | 53.4(14) | 65.2(15) | -0.2(12) | -0.4(14)  | 8.2(14)  |
| C11 | 50.4(12) | 48.5(12) | 40.0(10) | -1.6(9)  | -0.6(9)   | -2.3(10) |
| C12 | 40.5(10) | 59.5(14) | 43.7(11) | -3.5(10) | 2.7(9)    | 1.3(11)  |
| C13 | 44.0(11) | 57.2(13) | 41.5(11) | 1.3(9)   | -3.4(9)   | 3.7(11)  |
| C14 | 46.2(11) | 52.1(13) | 39.2(10) | -2.3(9)  | 1.1(9)    | -1.4(10) |
| C15 | 45.3(12) | 52.9(13) | 47.4(11) | -5.9(10) | 4.7(9)    | 6.1(11)  |
| C16 | 50.1(12) | 49.2(12) | 45.9(11) | 1.3(10)  | -5.6(9)   | 8.0(11)  |
| C17 | 46.1(12) | 64.0(15) | 58.9(13) | -1.3(11) | 8.4(11)   | -7.5(12) |
| C18 | 60.7(15) | 66.2(16) | 53.2(13) | 4.2(11)  | 15.0(11)  | -3.5(13) |
| C19 | 60.1(13) | 50.9(13) | 42.3(11) | 3.2(10)  | 8.9(10)   | 4.7(12)  |
| C20 | 88.5(19) | 64.8(15) | 39.8(11) | 3.2(11)  | 3.9(12)   | 6.9(16)  |
| C21 | 89(2)    | 68.0(16) | 49.0(13) | -7.5(12) | -11.4(13) | 1.2(16)  |
| C22 | 62.4(15) | 64.1(16) | 68.3(15) | -7.2(13) | -8.8(13)  | -6.6(13) |
| C23 | 55.7(13) | 60.5(14) | 47.0(11) | -0.9(11) | 3.8(10)   | -7.8(12) |
| C24 | 49.6(12) | 46.5(12) | 40.1(10) | -0.3(9)  | 2.4(9)    | 3.7(10)  |

**Table 4 Bond Lengths for 7n.**

| Atom | Atom | Length/Å | Atom | Atom | Length/Å |
|------|------|----------|------|------|----------|
| F1   | C12  | 1.350(3) | C7   | C9   | 1.557(3) |
| F2   | C13  | 1.341(3) | C7   | C10  | 1.520(4) |
| F3   | C16  | 1.347(3) | C9   | C11  | 1.509(3) |
| F4   | C15  | 1.338(3) | C11  | C12  | 1.383(3) |
| O1   | C1   | 1.380(3) | C11  | C16  | 1.389(3) |
| O1   | C8   | 1.444(3) | C12  | C13  | 1.373(3) |
| N1   | C14  | 1.410(3) | C13  | C14  | 1.387(3) |
| N1   | C17  | 1.390(3) | C14  | C15  | 1.386(3) |
| N1   | C24  | 1.389(3) | C15  | C16  | 1.376(3) |
| C1   | C2   | 1.377(4) | C17  | C18  | 1.345(3) |
| C1   | C6   | 1.369(3) | C18  | C19  | 1.423(4) |
| C2   | C3   | 1.372(4) | C19  | C20  | 1.399(4) |
| C3   | C4   | 1.382(4) | C19  | C24  | 1.407(3) |
| C4   | C5   | 1.389(4) | C20  | C21  | 1.369(4) |
| C5   | C6   | 1.380(3) | C21  | C22  | 1.386(4) |
| C6   | C7   | 1.513(3) | C22  | C23  | 1.376(3) |
| C7   | C8   | 1.534(3) | C23  | C24  | 1.378(3) |

**Table 5 Bond Angles for 7n.**

| Atom | Atom | Atom | Angle/°    | Atom | Atom | Atom | Angle/°    |
|------|------|------|------------|------|------|------|------------|
| C1   | O1   | C8   | 105.92(19) | F1   | C12  | C13  | 117.4(2)   |
| C17  | N1   | C14  | 126.16(19) | C13  | C12  | C11  | 123.0(2)   |
| C24  | N1   | C14  | 125.17(18) | F2   | C13  | C12  | 119.2(2)   |
| C24  | N1   | C17  | 108.39(18) | F2   | C13  | C14  | 119.65(18) |
| C2   | C1   | O1   | 124.7(2)   | C12  | C13  | C14  | 121.2(2)   |
| C6   | C1   | O1   | 112.5(2)   | C13  | C14  | N1   | 121.8(2)   |
| C6   | C1   | C2   | 122.9(2)   | C15  | C14  | N1   | 121.53(19) |
| C3   | C2   | C1   | 116.9(3)   | C15  | C14  | C13  | 116.71(19) |
| C2   | C3   | C4   | 121.8(2)   | F4   | C15  | C14  | 119.77(19) |
| C3   | C4   | C5   | 120.2(3)   | F4   | C15  | C16  | 119.1(2)   |
| C6   | C5   | C4   | 118.4(2)   | C16  | C15  | C14  | 121.1(2)   |
| C1   | C6   | C5   | 119.9(2)   | F3   | C16  | C11  | 119.46(19) |
| C1   | C6   | C7   | 108.8(2)   | F3   | C16  | C15  | 117.7(2)   |
| C5   | C6   | C7   | 131.3(2)   | C15  | C16  | C11  | 122.8(2)   |
| C6   | C7   | C8   | 99.35(18)  | C18  | C17  | N1   | 109.5(2)   |
| C6   | C7   | C9   | 107.50(18) | C17  | C18  | C19  | 108.0(2)   |
| C6   | C7   | C10  | 113.0(2)   | C20  | C19  | C18  | 135.0(2)   |
| C8   | C7   | C9   | 112.2(2)   | C20  | C19  | C24  | 117.8(2)   |
| C10  | C7   | C8   | 112.4(2)   | C24  | C19  | C18  | 107.2(2)   |
| C10  | C7   | C9   | 111.7(2)   | C21  | C20  | C19  | 119.5(2)   |
| O1   | C8   | C7   | 106.8(2)   | C20  | C21  | C22  | 121.3(2)   |
| C11  | C9   | C7   | 116.07(19) | C23  | C22  | C21  | 121.1(3)   |
| C12  | C11  | C9   | 123.3(2)   | C22  | C23  | C24  | 117.5(2)   |
| C12  | C11  | C16  | 115.06(19) | N1   | C24  | C19  | 106.96(19) |
| C16  | C11  | C9   | 121.6(2)   | C23  | C24  | N1   | 130.17(19) |
| F1   | C12  | C11  | 119.56(18) | C23  | C24  | C19  | 122.8(2)   |

**Table 6 Hydrogen Atom Coordinates ( $\text{\AA} \times 10^4$ ) and Isotropic Displacement Parameters ( $\text{\AA}^2 \times 10^3$ ) for 7n.**

| Atom | x       | y       | z       | U(eq) |
|------|---------|---------|---------|-------|
| H2   | 1193.1  | 6434.96 | 4679.77 | 83    |
| H3   | 3991.94 | 6931.38 | 4266.47 | 86    |
| H4   | 7287.15 | 6129.43 | 4430.7  | 84    |
| H5   | 7869.49 | 4826.27 | 5026.57 | 72    |
| H8A  | 2081.94 | 2768.65 | 5543.92 | 68    |
| H8B  | 1890.7  | 3932.66 | 5900.97 | 68    |
| H9A  | 6936.76 | 5485.6  | 5886.3  | 58    |
| H9B  | 4758.63 | 6275.06 | 5860.88 | 58    |
| H10A | 5561.55 | 1932.85 | 5439.28 | 97    |

|      |         |         |         |    |
|------|---------|---------|---------|----|
| H10B | 5812.54 | 2193.59 | 5899.63 | 97 |
| H10C | 7455.55 | 2872.74 | 5602.77 | 97 |
| H17  | 1100.68 | 3040.88 | 7613.96 | 68 |
| H18  | 1439.62 | 3057.2  | 8335.83 | 72 |
| H20  | 4716.33 | 4339.25 | 8853.94 | 77 |
| H21  | 7801    | 5653.31 | 8830.08 | 82 |
| H22  | 9353.62 | 6234.2  | 8230.96 | 78 |
| H23  | 7805.69 | 5545.03 | 7633.27 | 65 |

## 14. $^1\text{H}$ , $^{19}\text{F}$ , $^{31}\text{P}$ , $^{13}\text{C}$ NMR and HPLC Spectra

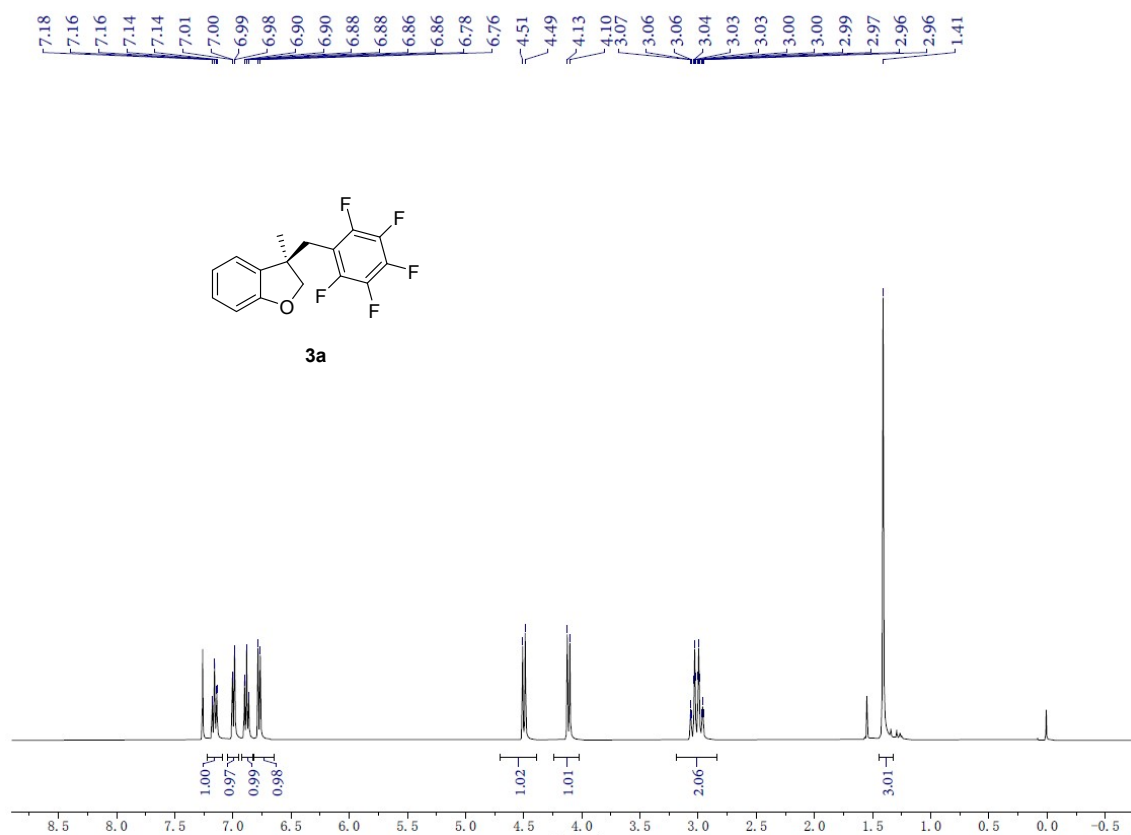

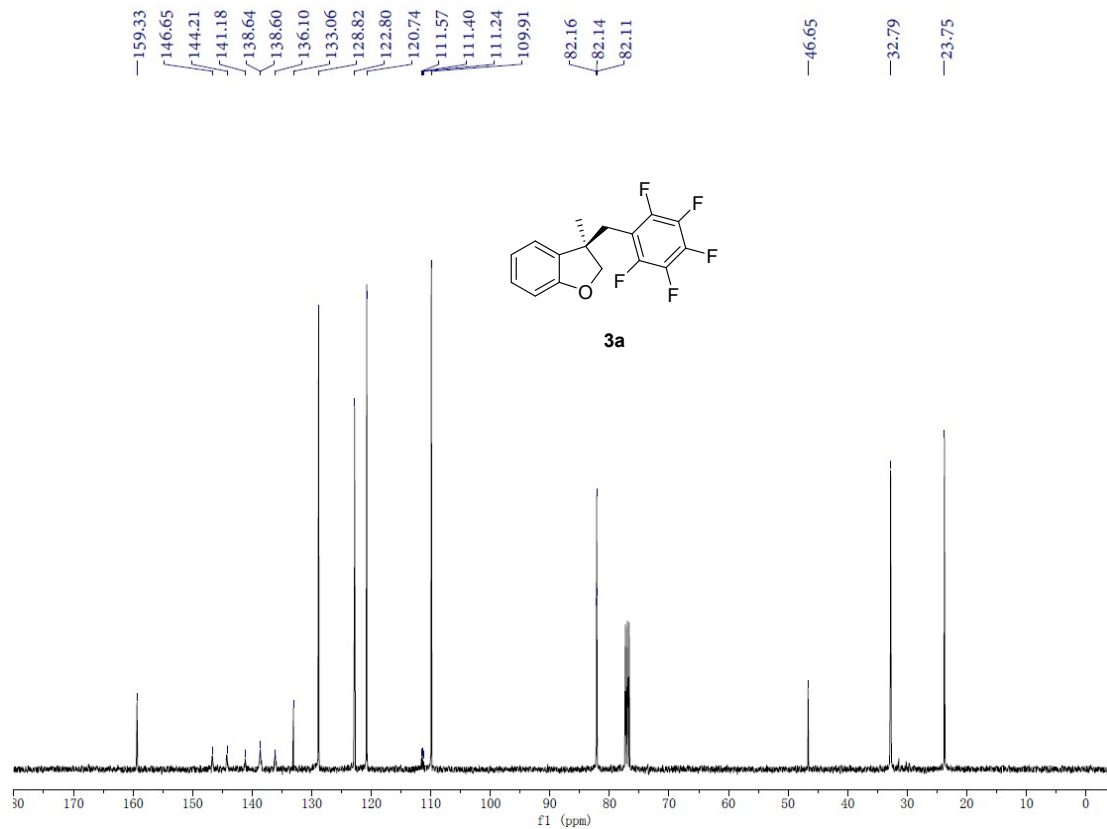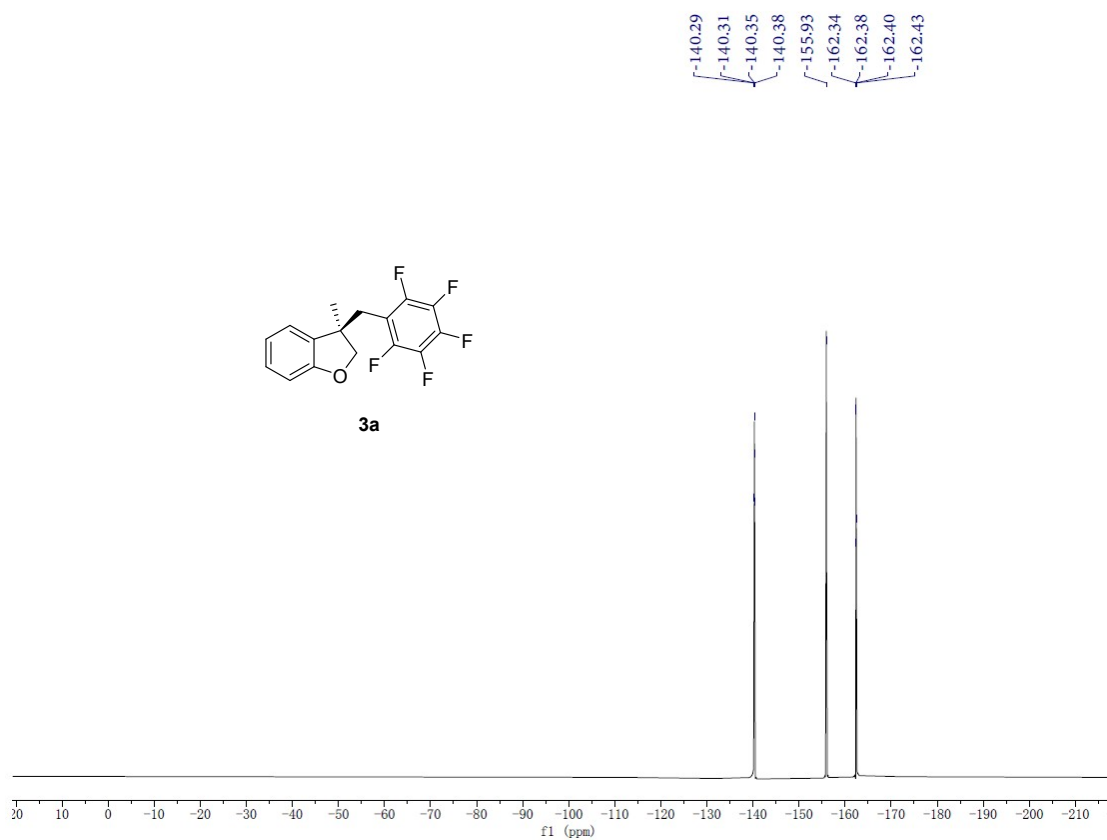

<Chromatogram>

mV

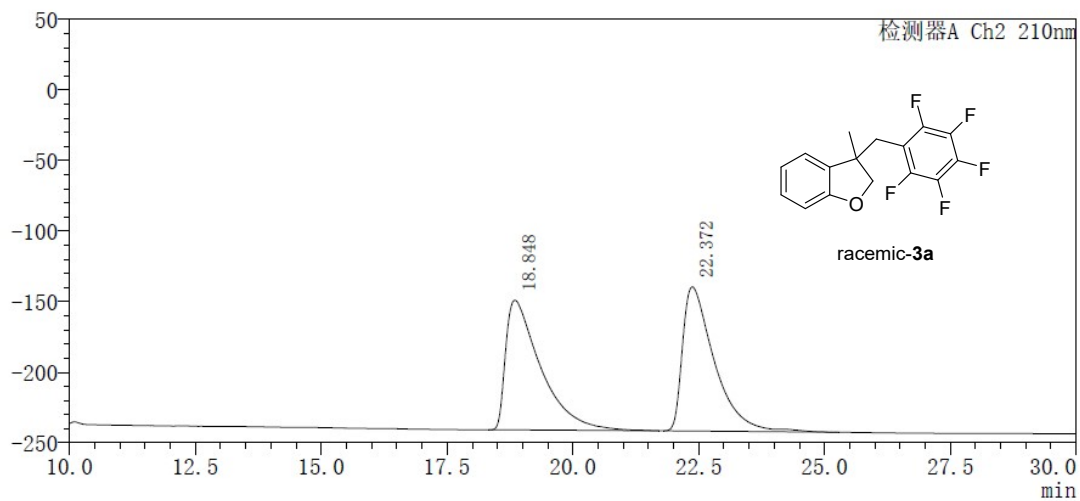

<Peak Table>

检测器A Ch2 210nm

| No.   | Ret. Time (min) | Height | Height% | Area    | Area%   |
|-------|-----------------|--------|---------|---------|---------|
| 1     | 18.848          | 91867  | 47.342  | 4474509 | 49.803  |
| 2     | 22.372          | 102185 | 52.658  | 4509948 | 50.197  |
| Total |                 | 194052 | 100.000 | 8984457 | 100.000 |

<Chromatogram>

mV

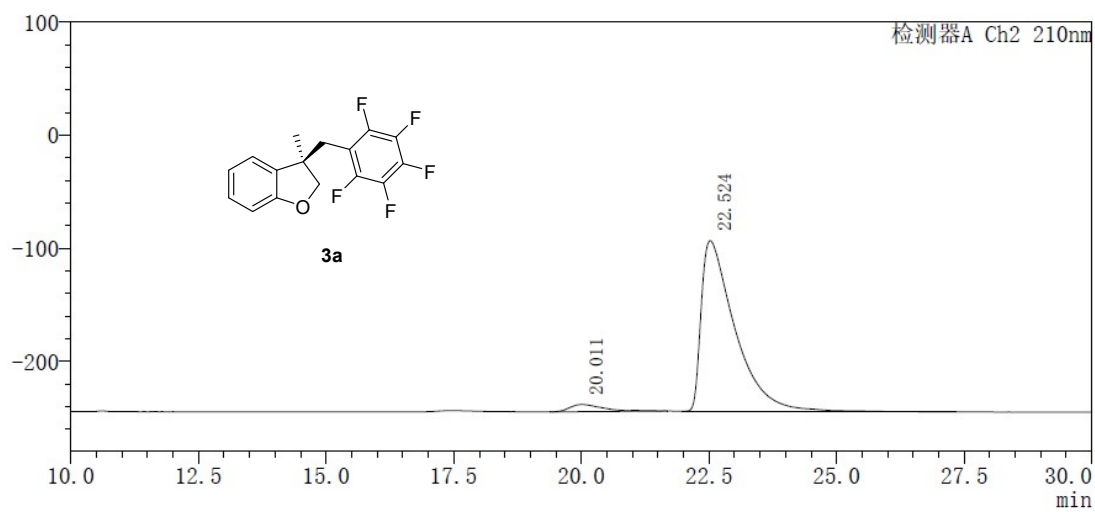

<Peak Table>

检测器A Ch2 210nm

| No.   | Ret. Time (min) | Height | Height% | Area    | Area%   |
|-------|-----------------|--------|---------|---------|---------|
| 1     | 20.011          | 6346   | 4.018   | 298261  | 4.040   |
| 2     | 22.524          | 151585 | 95.982  | 7085097 | 95.960  |
| Total |                 | 157931 | 100.000 | 7383358 | 100.000 |

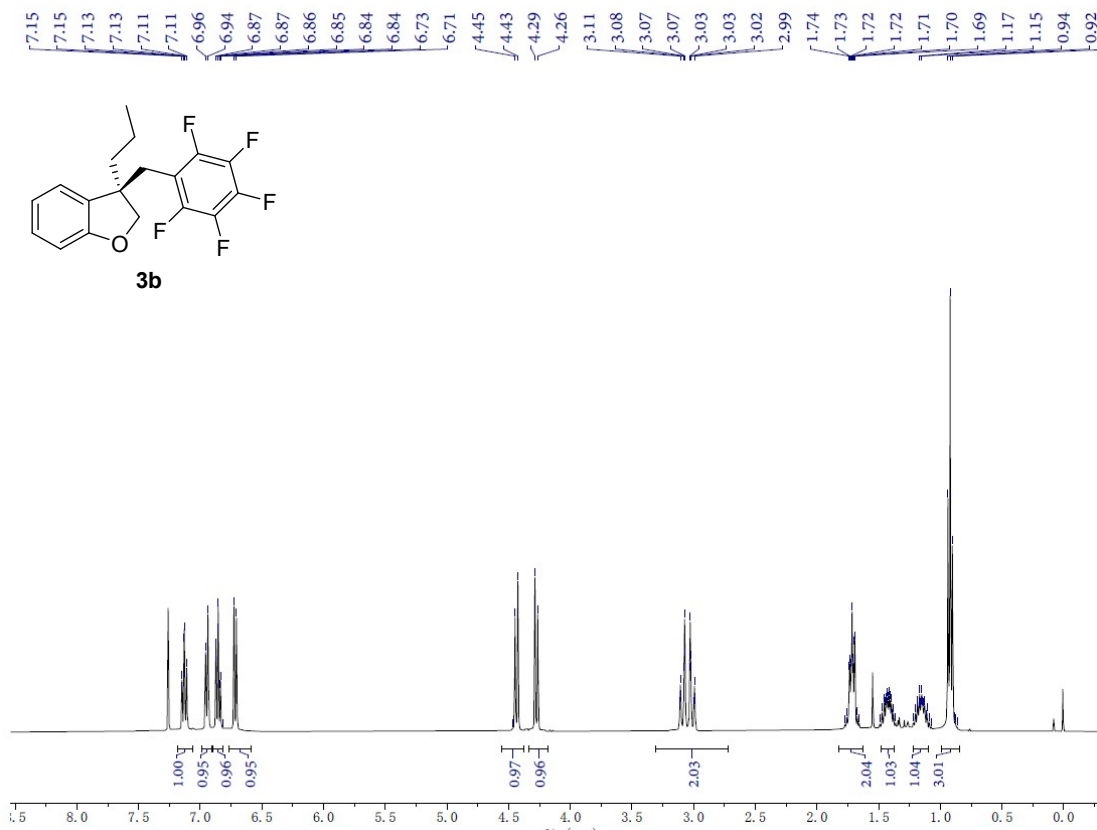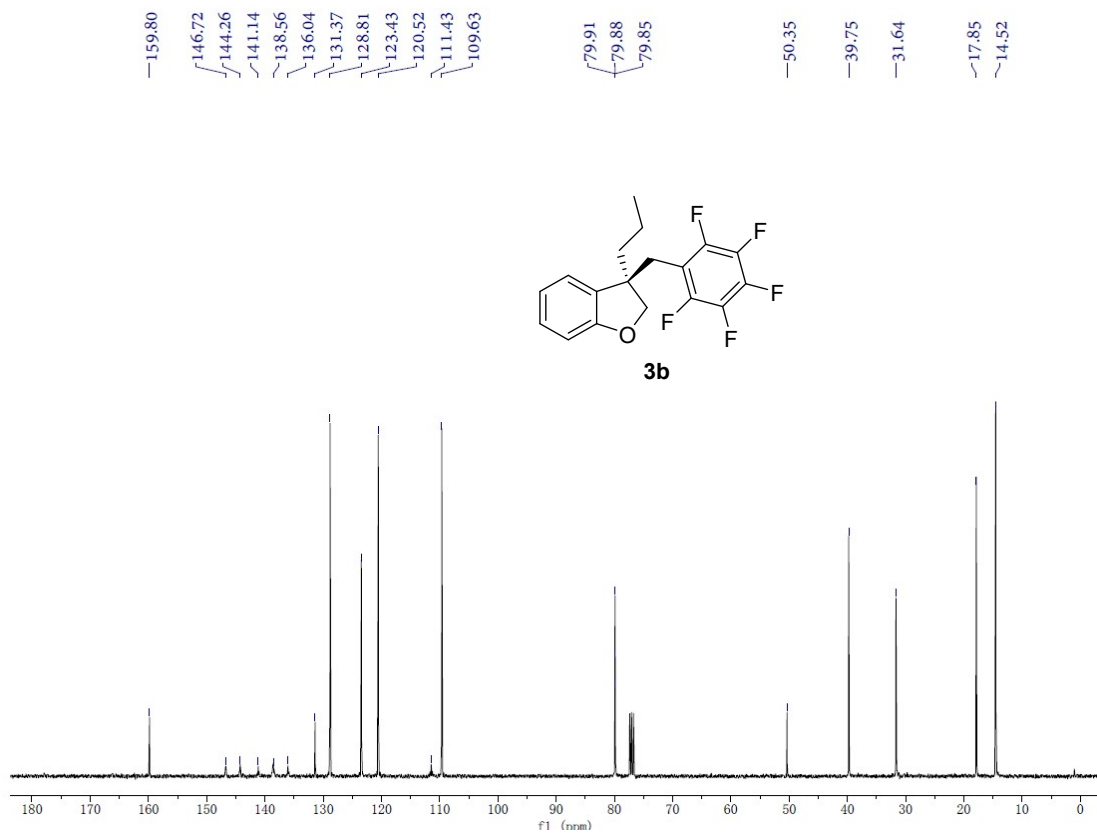



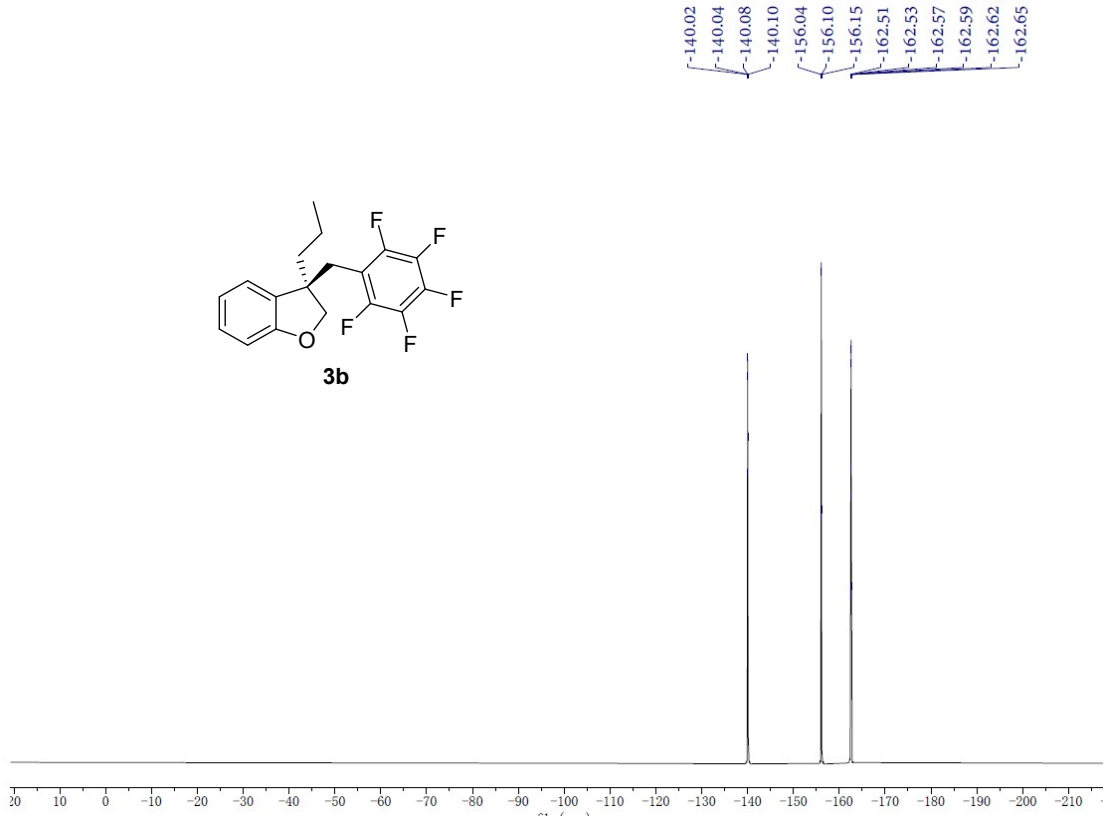

<Chromatogram>

mV

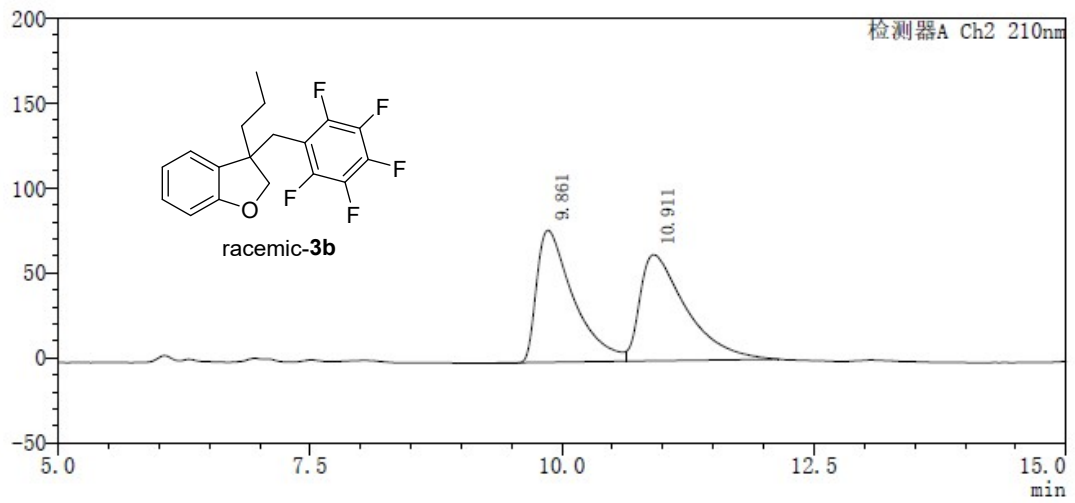

<Peak Table>

检测器A Ch2 210nm

| No.   | Ret. Time (min) | Height | Height% | Area    | Area%   |
|-------|-----------------|--------|---------|---------|---------|
| 1     | 9.861           | 77704  | 55.426  | 1973809 | 49.743  |
| 2     | 10.911          | 62490  | 44.574  | 1994177 | 50.257  |
| Total |                 | 140195 | 100.000 | 3967987 | 100.000 |

<Chromatogram>

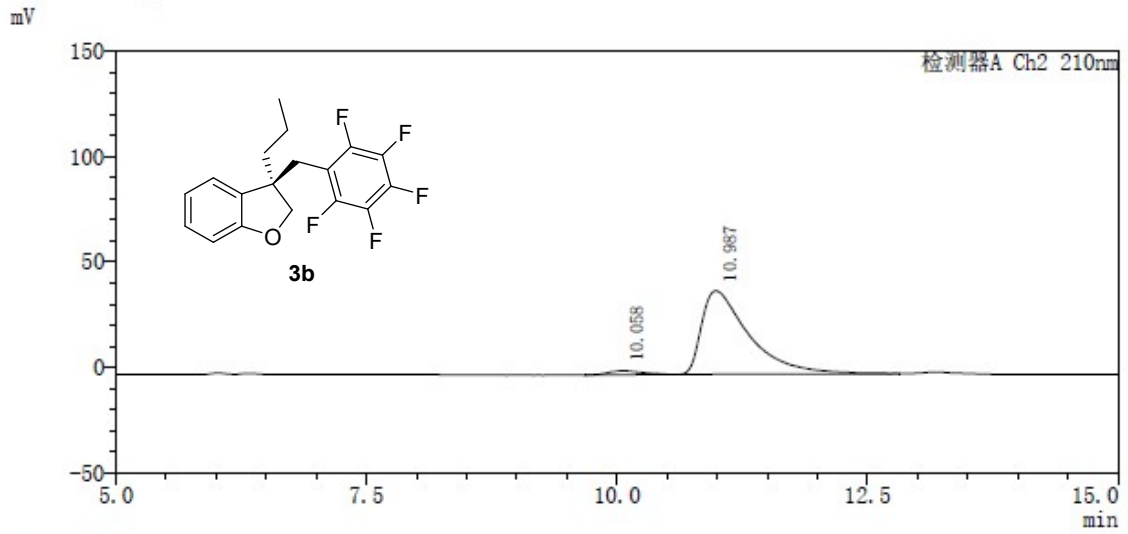

<Peak Table>

检测器A Ch2 210nm

| No.   | Ret. Time (min) | Height | Height% | Area    | Area%   |
|-------|-----------------|--------|---------|---------|---------|
| 1     | 10.058          | 1841   | 4.455   | 42794   | 3.195   |
| 2     | 10.987          | 39489  | 95.545  | 1296548 | 96.805  |
| Total |                 | 41330  | 100.000 | 1339343 | 100.000 |

7.15 7.15 7.13 7.13 7.11 7.11 6.95 6.95 6.93 6.93 6.85 6.85 6.72 6.70 6.70 4.44 4.44 4.42 4.42 4.28 4.28 4.26 4.26 3.10 3.10 3.07 3.07 3.06 3.06 3.03 3.03 3.02 3.02 3.02 2.99 1.76 1.76 1.74 1.74 1.72 1.72 1.38 1.38 1.35 1.35 1.34 1.34 1.32 1.32 1.30 1.30 1.29 1.29 1.28 1.28 1.11 1.11 1.09 1.09 0.90 0.90 0.88 0.88 0.86 0.86

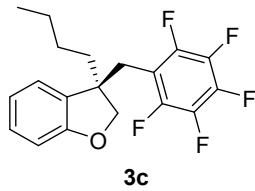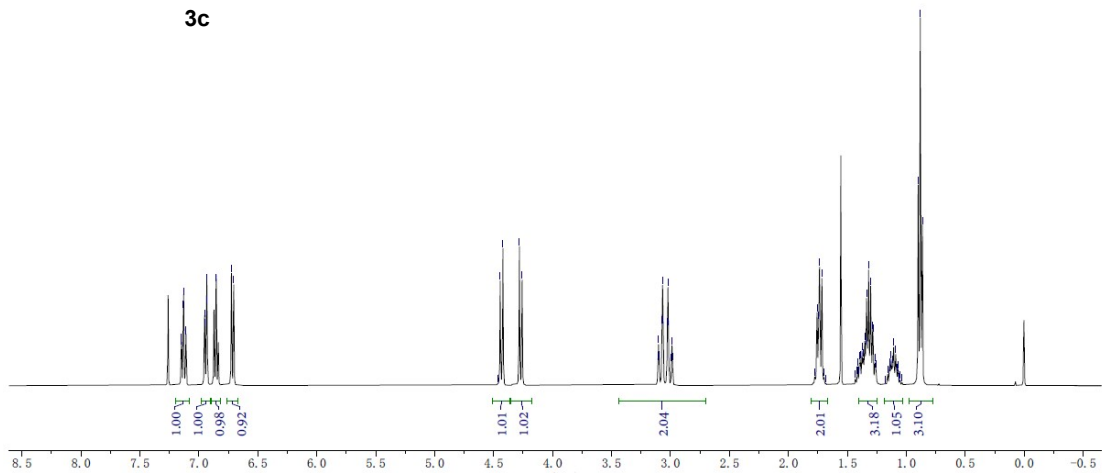

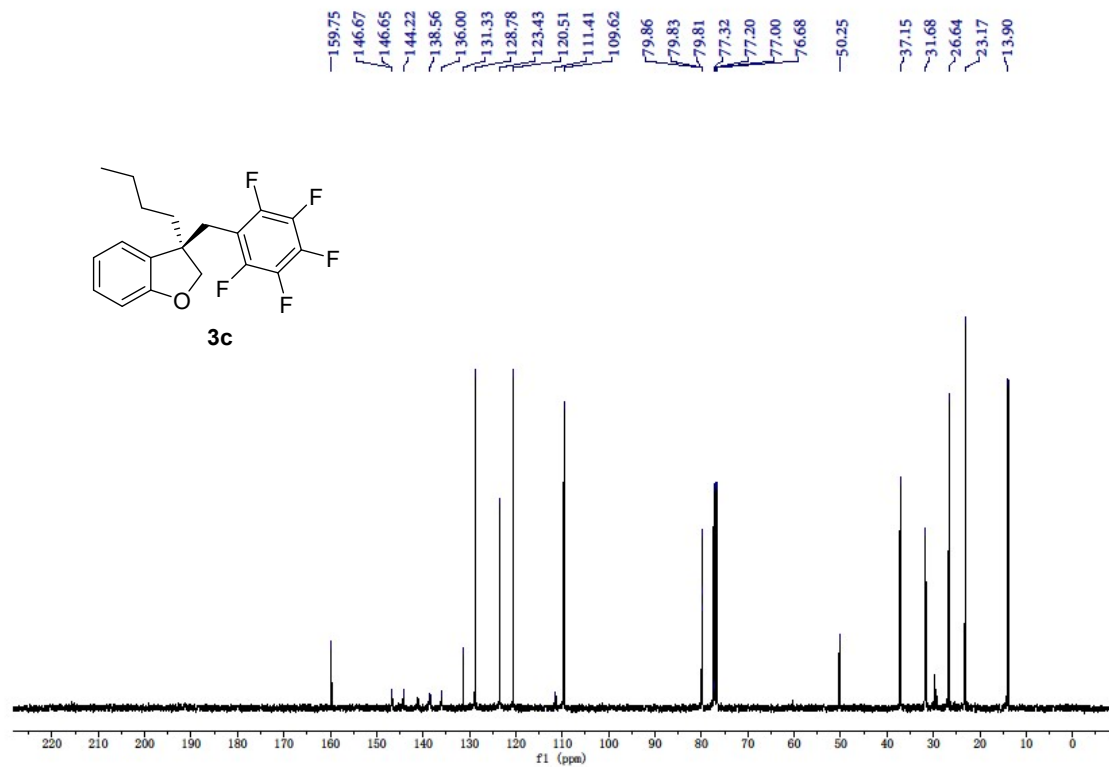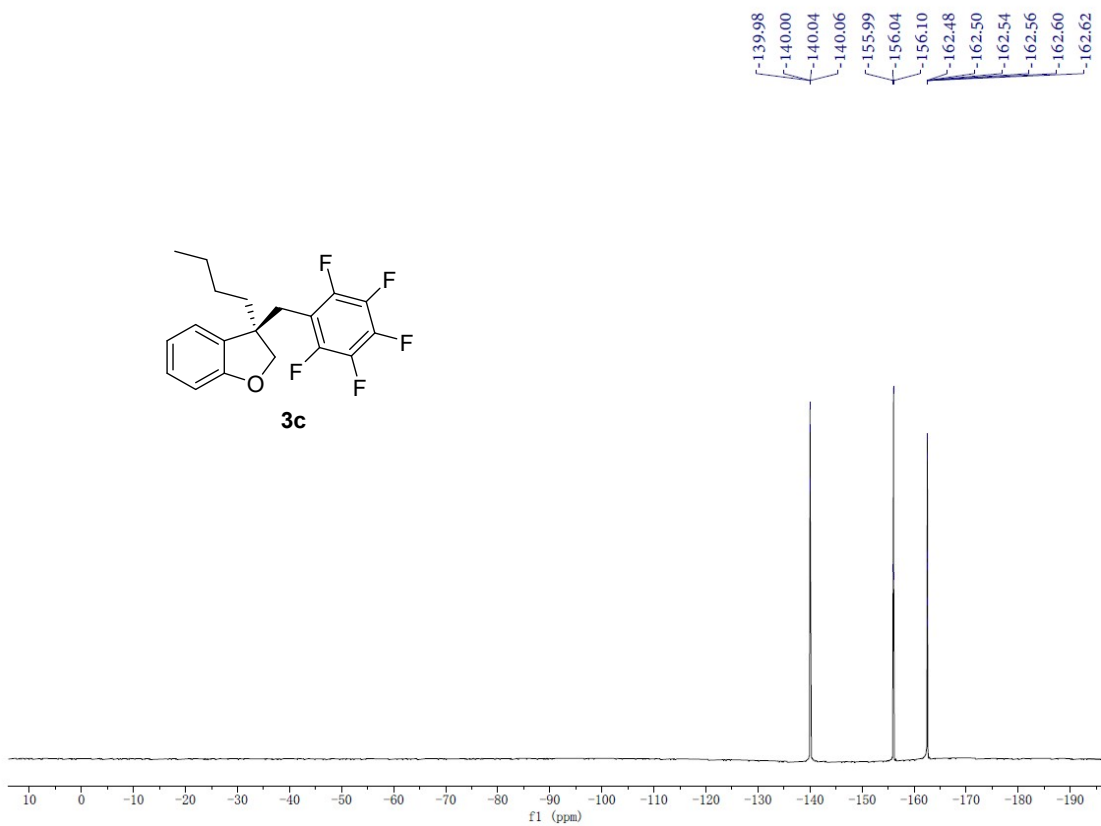

<Chromatogram>

mV

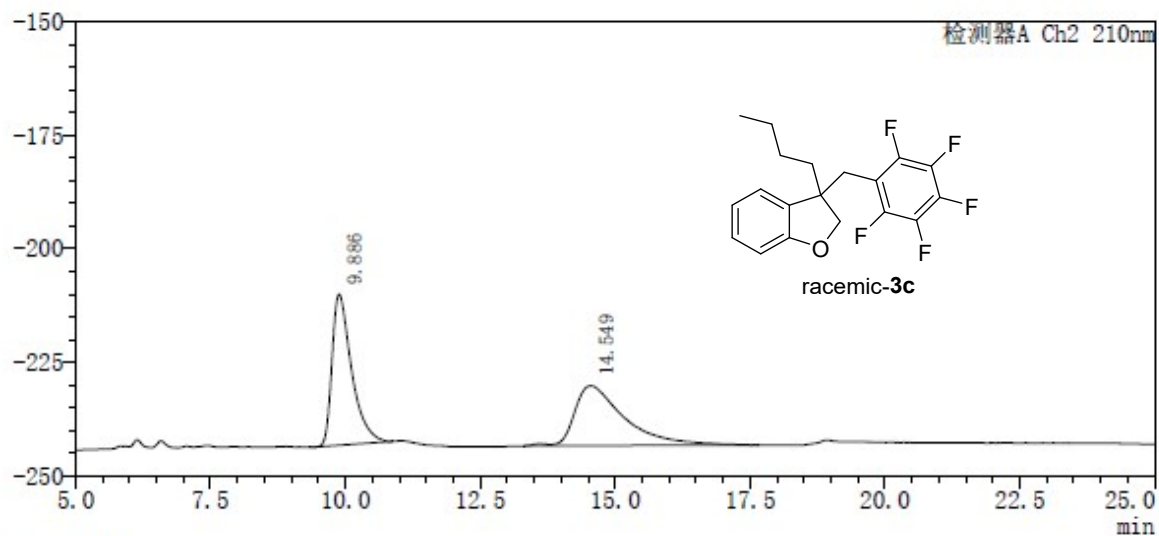

<Peak Table>

检测器A Ch2 210nm

| No.   | Ret. Time (min) | Height | Height% | Area    | Area%   |
|-------|-----------------|--------|---------|---------|---------|
| 1     | 9.886           | 33271  | 71.617  | 839602  | 49.846  |
| 2     | 14.549          | 13186  | 28.383  | 844799  | 50.154  |
| Total |                 | 46456  | 100.000 | 1684401 | 100.000 |

<Chromatogram>

mV

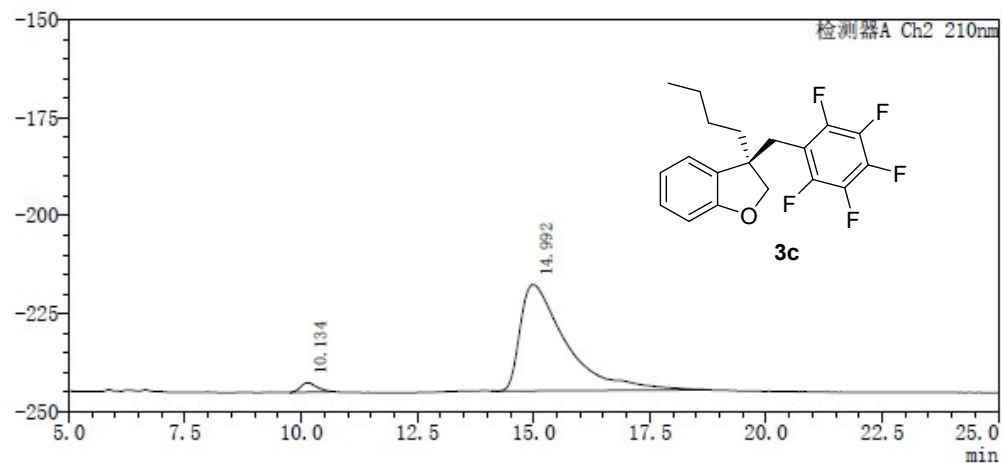

<Peak Table>

检测器A Ch2 210nm

| No.   | Ret. Time (min) | Height | Height% | Area    | Area%   |
|-------|-----------------|--------|---------|---------|---------|
| 1     | 10.134          | 2374   | 8.059   | 57603   | 2.998   |
| 2     | 14.992          | 27082  | 91.941  | 1863609 | 97.002  |
| Total |                 | 29455  | 100.000 | 1921212 | 100.000 |

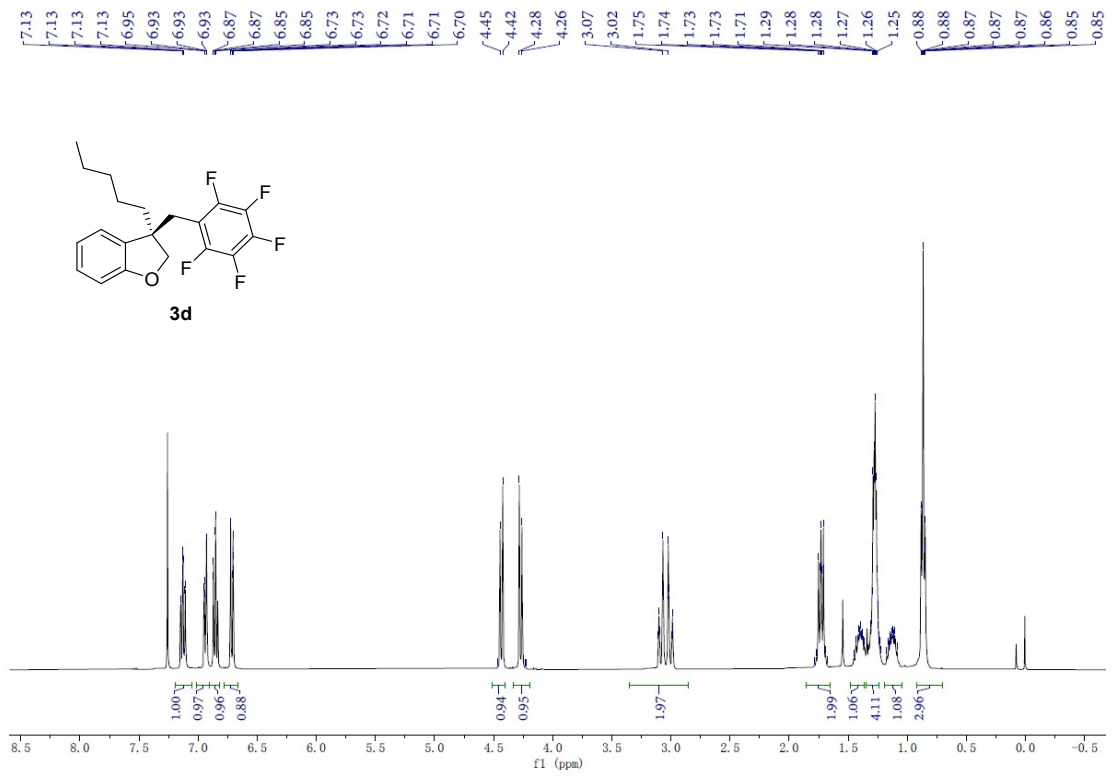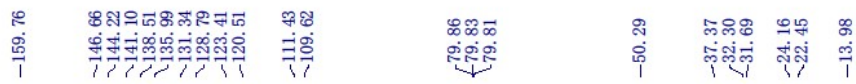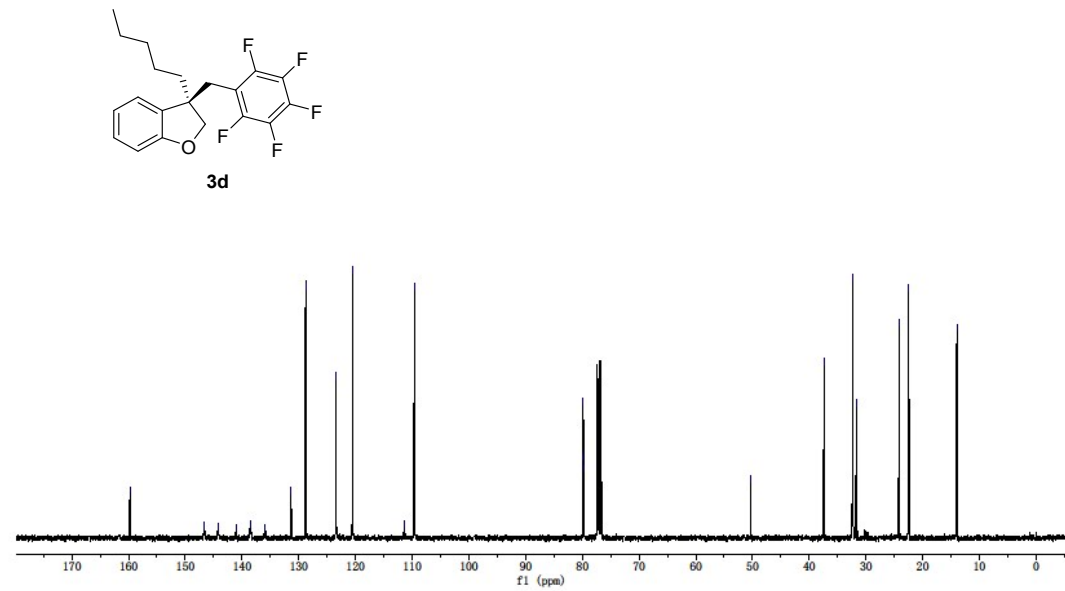

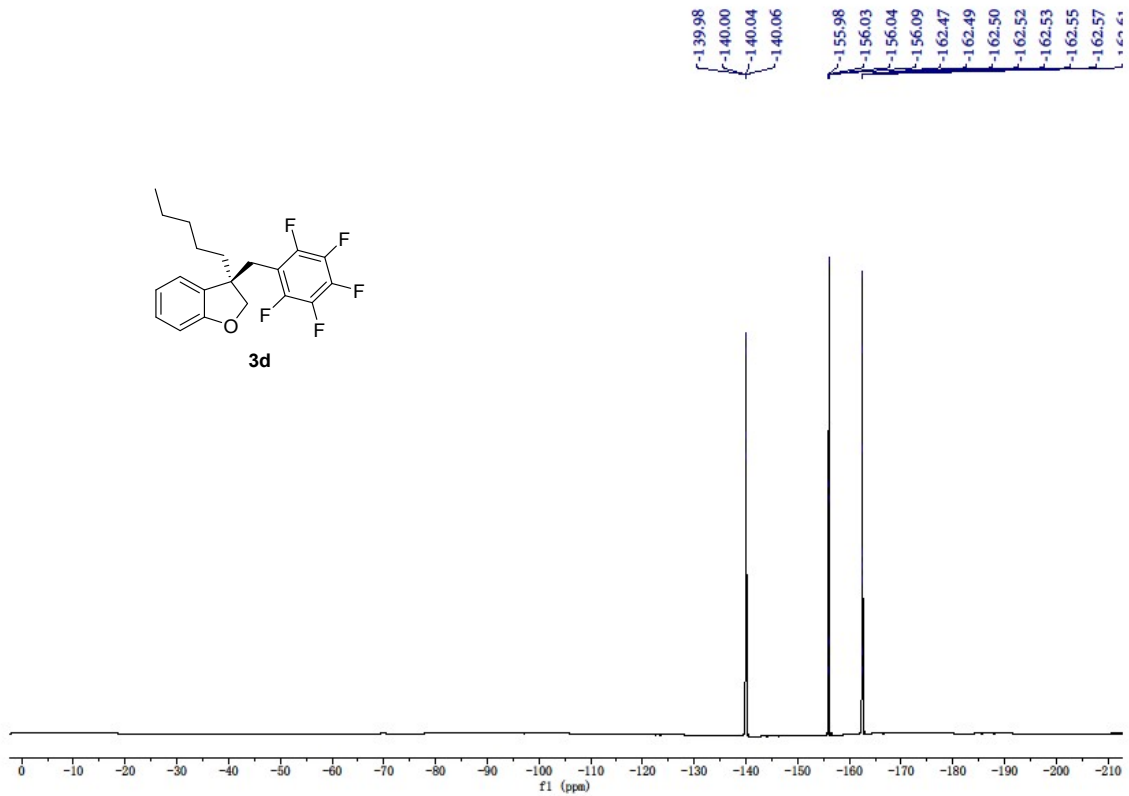

<Chromatogram>

mV

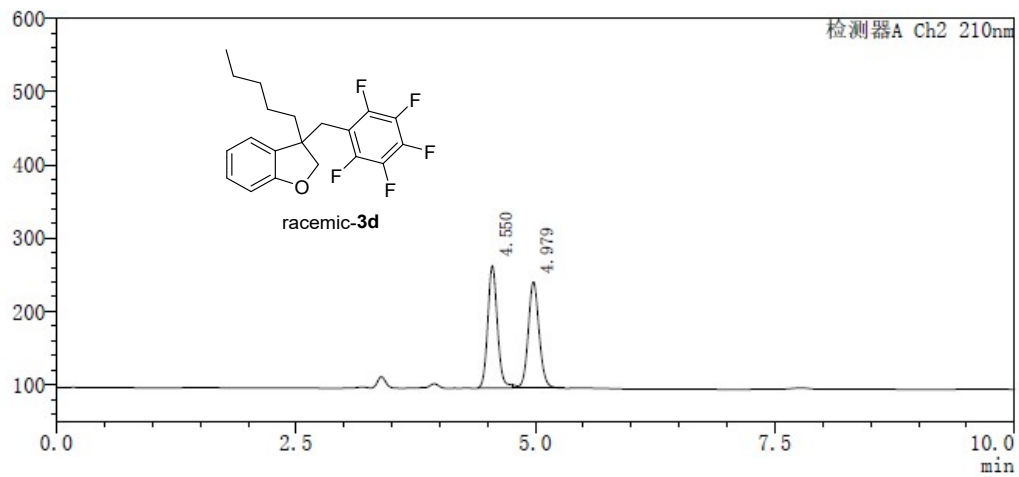

<Peak Table>

检测器A Ch2 210nm

| No.   | Ret. Time (min) | Height | Height% | Area    | Area%   |
|-------|-----------------|--------|---------|---------|---------|
| 1     | 4.550           | 167029 | 53.558  | 1168686 | 50.180  |
| 2     | 4.979           | 144836 | 46.442  | 1160303 | 49.820  |
| Total |                 | 311865 | 100.000 | 2328989 | 100.000 |

<Chromatogram>

mV

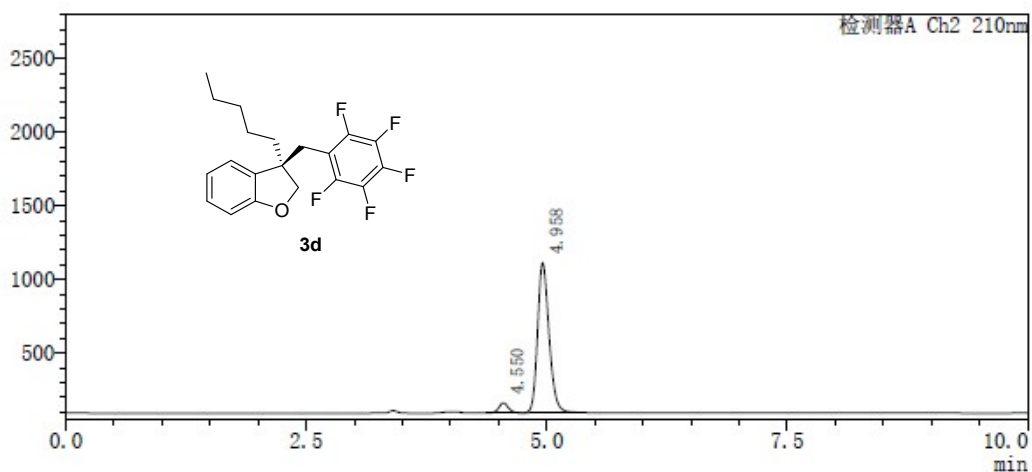

<Peak Table>

检测器A Ch2 210nm

| No.   | Ret. Time (min) | Height  | Height% | Area    | Area%   |
|-------|-----------------|---------|---------|---------|---------|
| 1     | 4.550           | 65557   | 6.049   | 431049  | 4.869   |
| 2     | 4.958           | 1018245 | 93.951  | 8422027 | 95.131  |
| Total |                 | 1083802 | 100.000 | 8853076 | 100.000 |

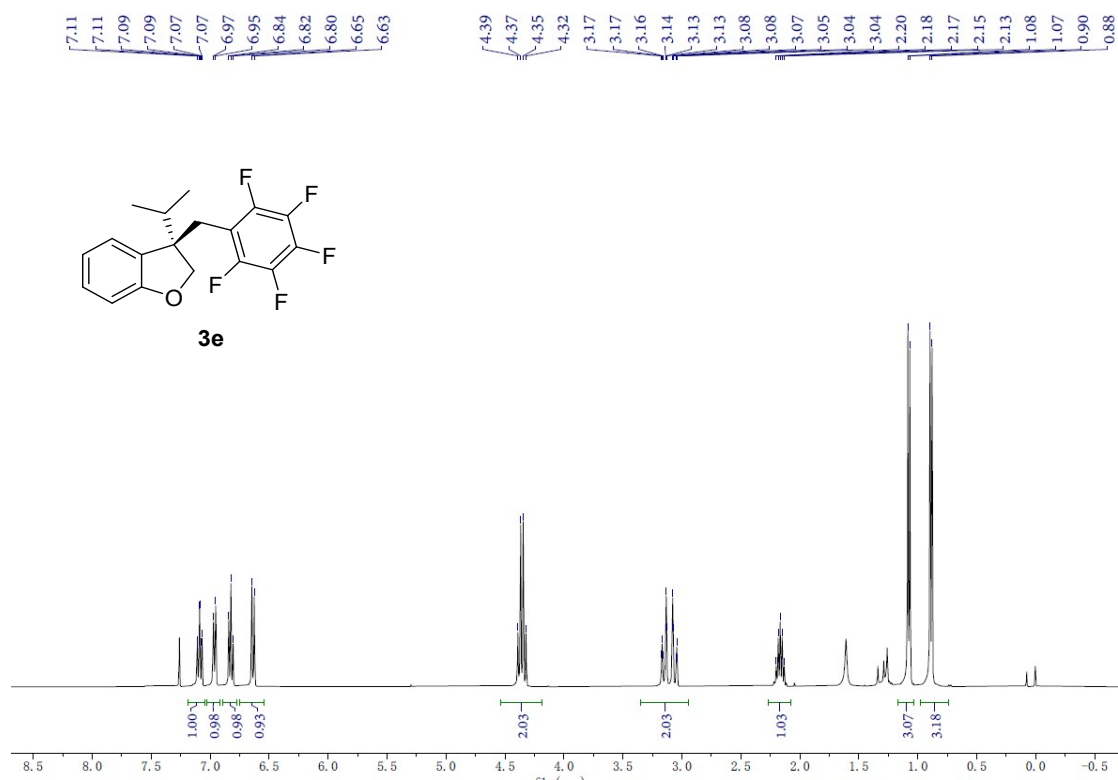

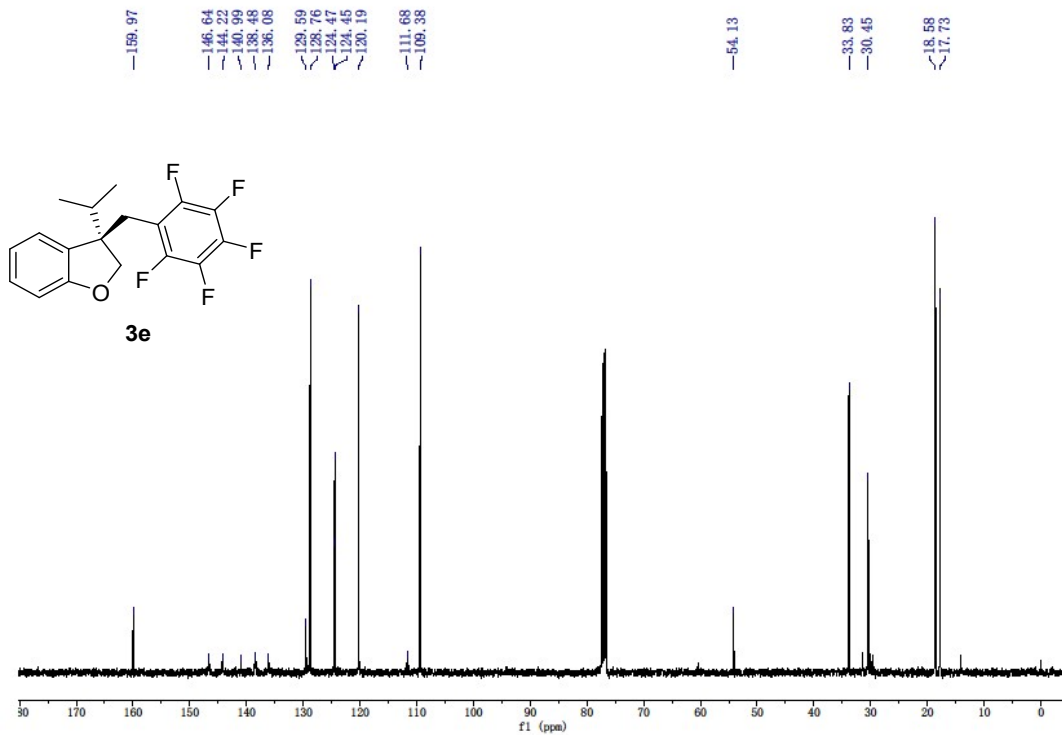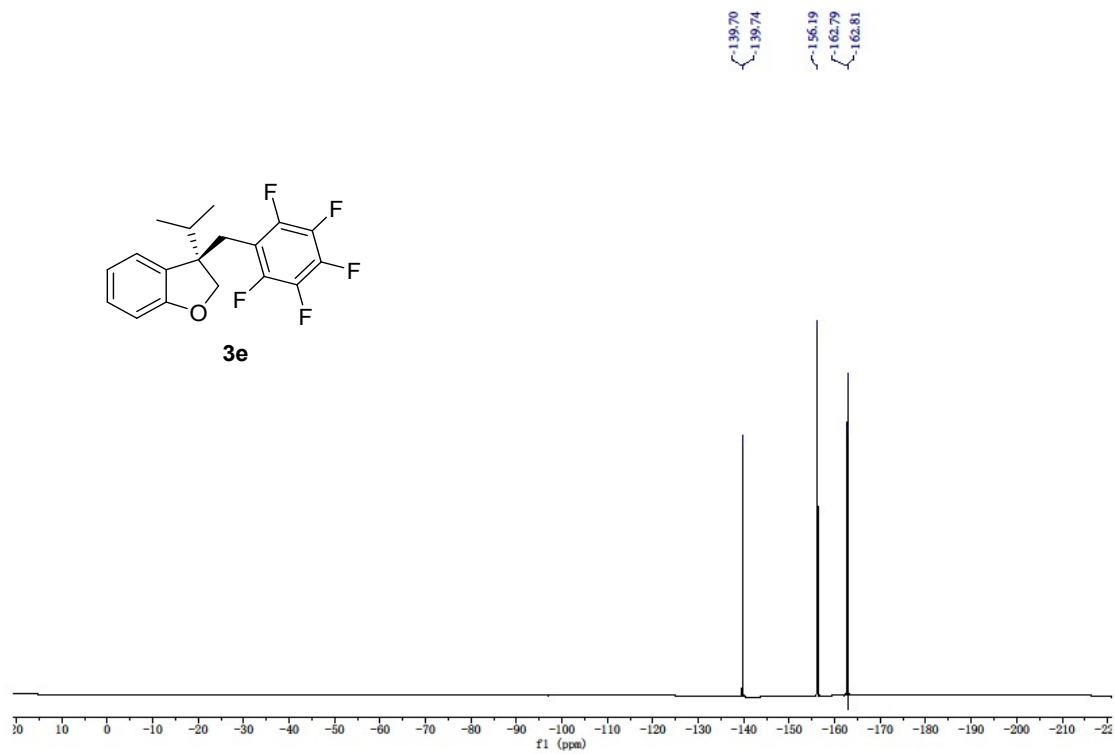



<Chromatogram>

mV

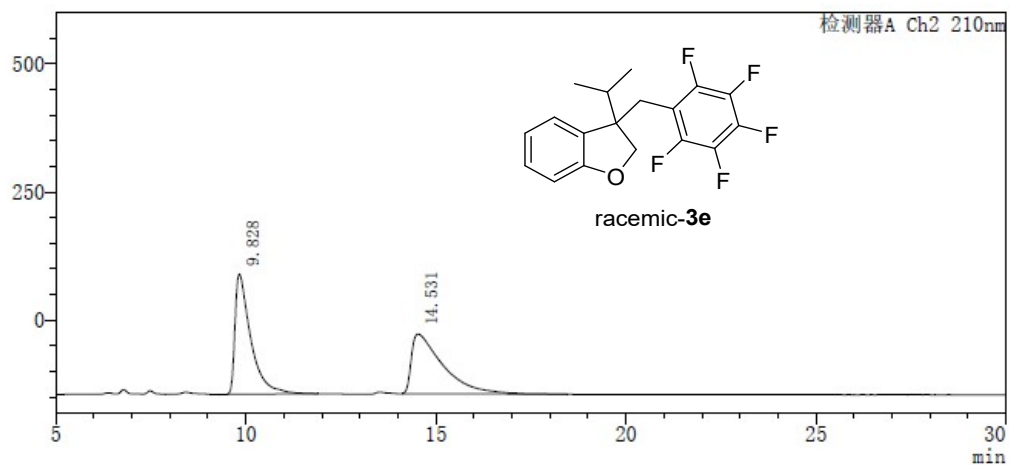

<Peak Table>

检测器A Ch2 210nm

| No.   | Ret. Time (min) | Height | Height% | Area     | Area%   |
|-------|-----------------|--------|---------|----------|---------|
| 1     | 9.828           | 234376 | 66.839  | 6768372  | 50.205  |
| 2     | 14.531          | 116279 | 33.161  | 6713205  | 49.795  |
| Total |                 | 350655 | 100.000 | 13481577 | 100.000 |

<Chromatogram>

mV

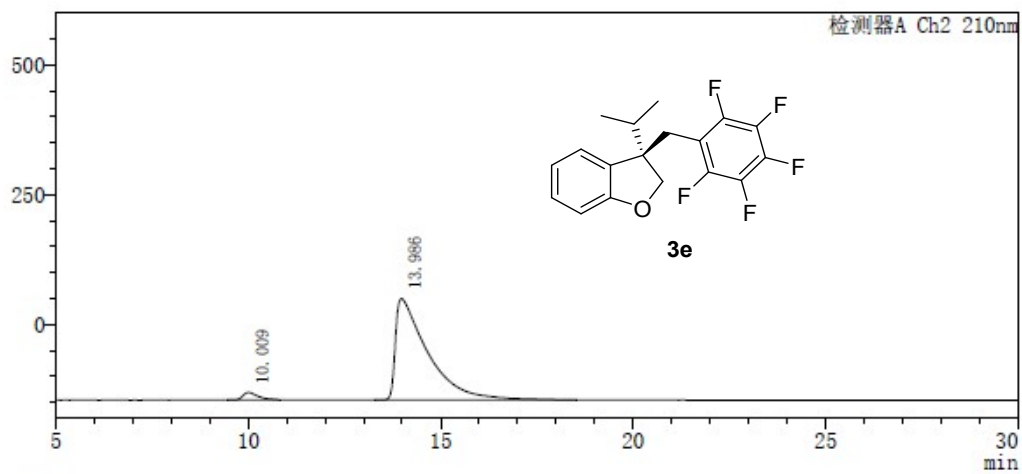

<Peak Table>

检测器A Ch2 210nm

| No.   | Ret. Time (min) | Height | Height% | Area     | Area%   |
|-------|-----------------|--------|---------|----------|---------|
| 1     | 10.009          | 14282  | 6.821   | 376417   | 3.203   |
| 2     | 13.986          | 195102 | 93.179  | 11376753 | 96.797  |
| Total |                 | 209384 | 100.000 | 11753171 | 100.000 |

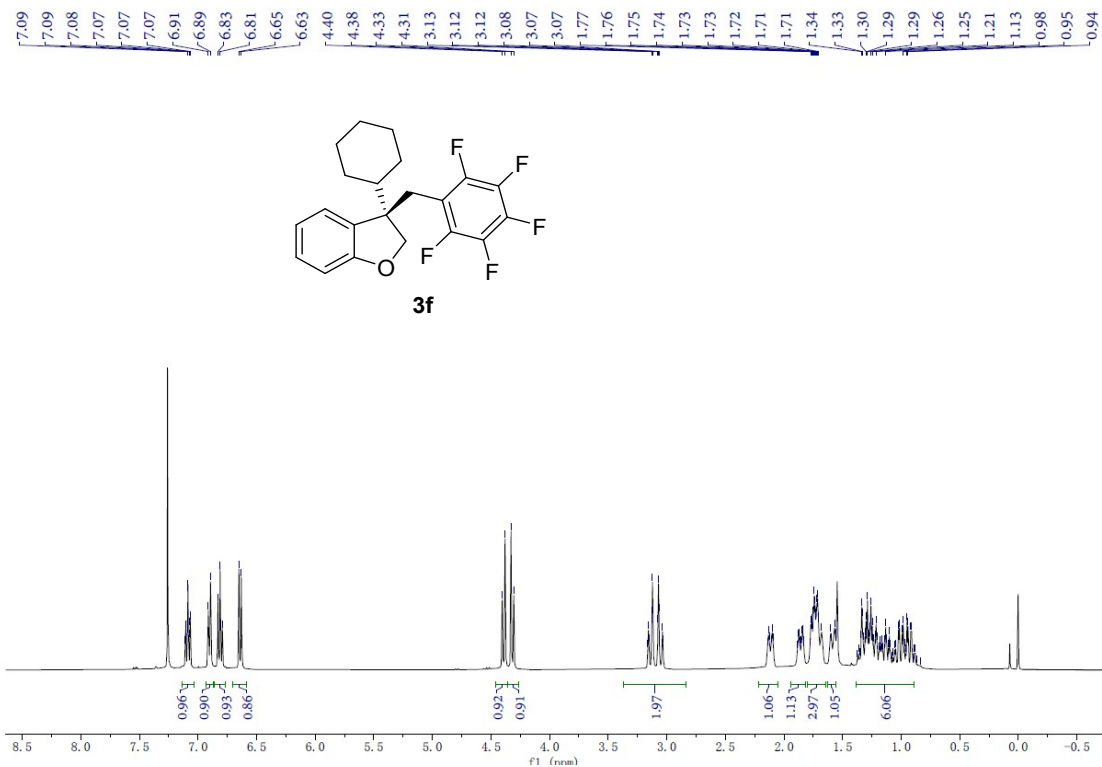

-159.96  
146.67  
144.23  
140.96  
138.37  
135.87  
129.40  
128.69  
124.59  
120.09  
111.67  
109.42  
-53.95  
-43.86  
30.11  
28.36  
27.93  
26.73  
26.57  
26.45  
26.36

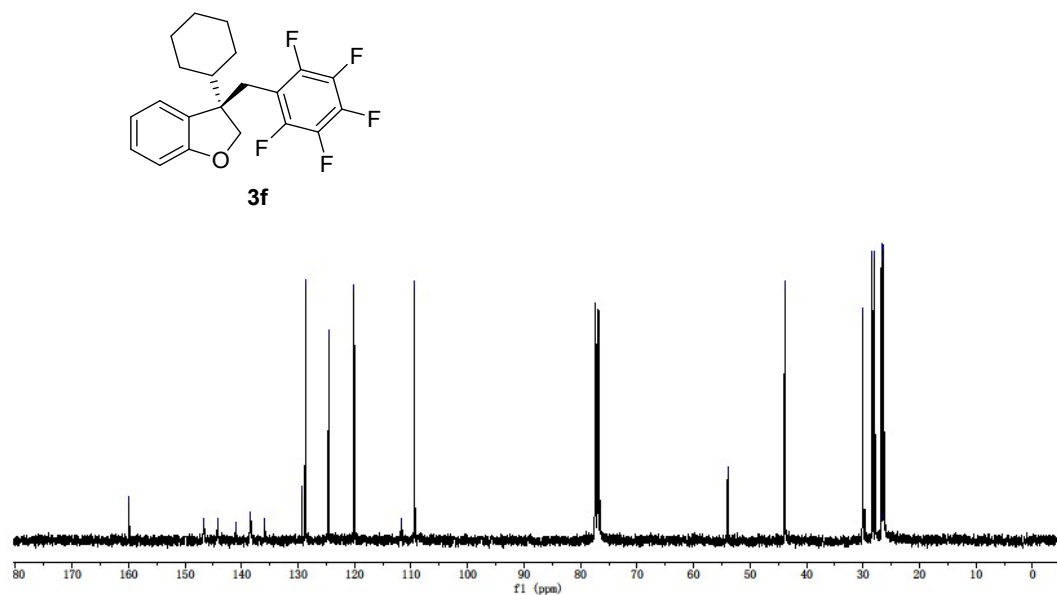

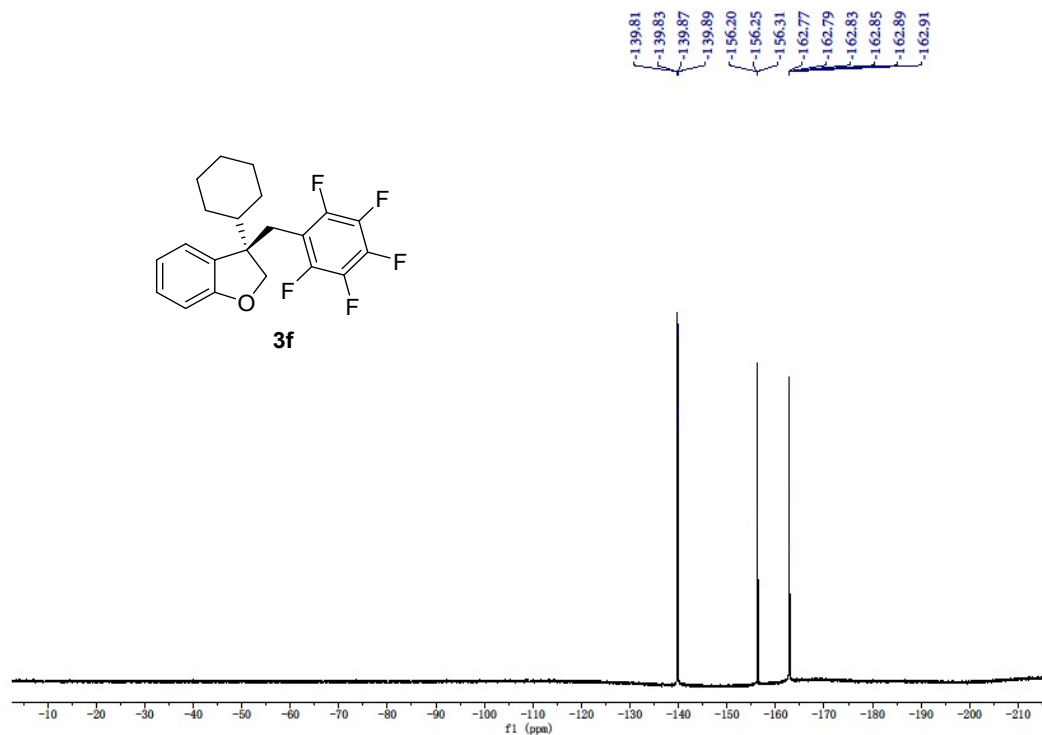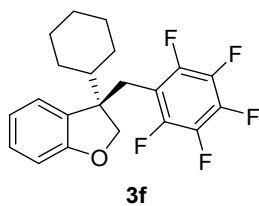

<Chromatogram>

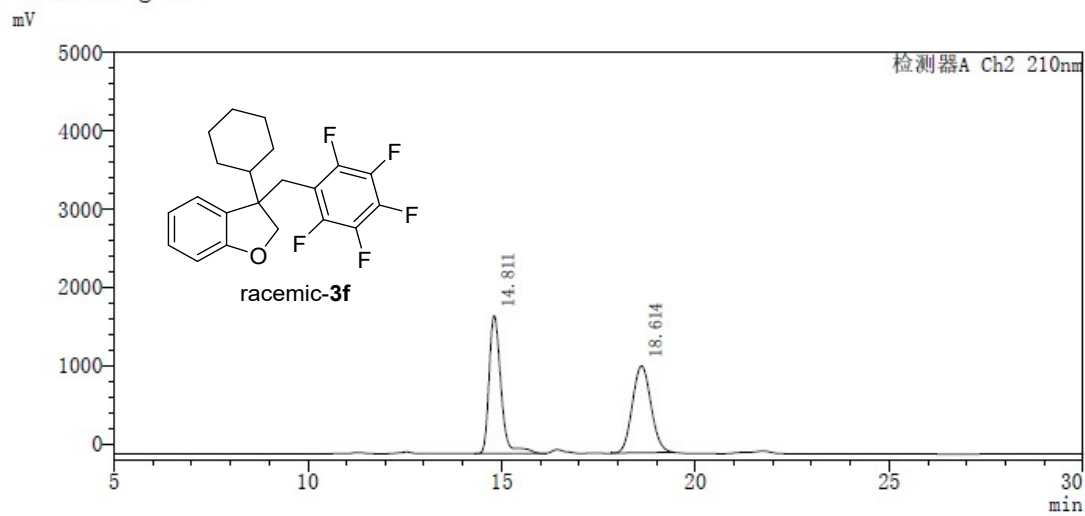

<Peak Table>

检测器A Ch2 210nm

| No.   | Ret. Time (min) | Height  | Height% | Area     | Area%   |
|-------|-----------------|---------|---------|----------|---------|
| 1     | 14.811          | 1760480 | 61.359  | 37711092 | 50.367  |
| 2     | 18.614          | 1108656 | 38.641  | 37161924 | 49.633  |
| Total |                 | 2869136 | 100.000 | 74873017 | 100.000 |

<Chromatogram>

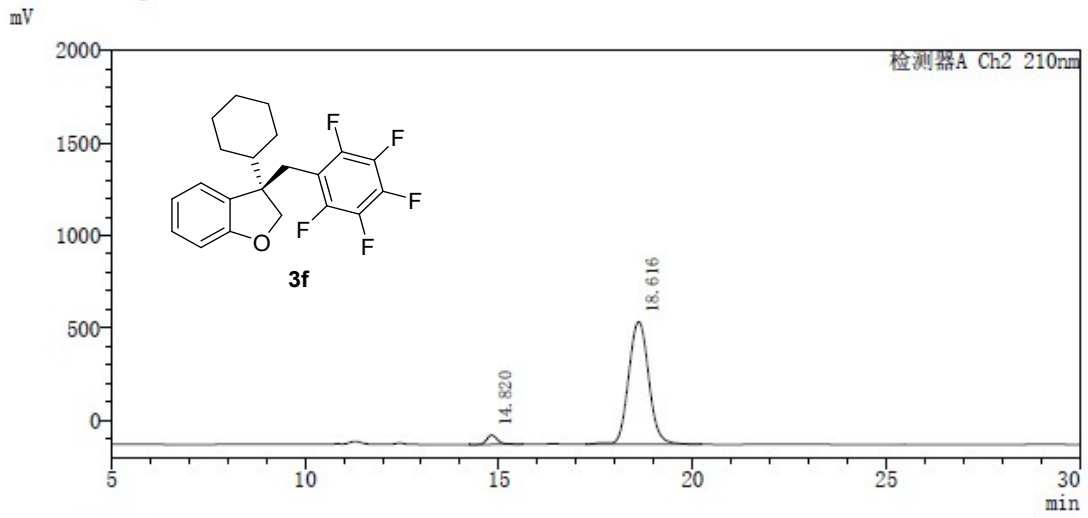

<Peak Table>

检测器A Ch2 210nm

| No.   | Ret. Time (min) | Height | Height% | Area     | Area%   |
|-------|-----------------|--------|---------|----------|---------|
| 1     | 14.820          | 50514  | 7.089   | 977411   | 3.908   |
| 2     | 18.616          | 662058 | 92.911  | 24036209 | 96.092  |
| Total |                 | 712572 | 100.000 | 25013621 | 100.000 |

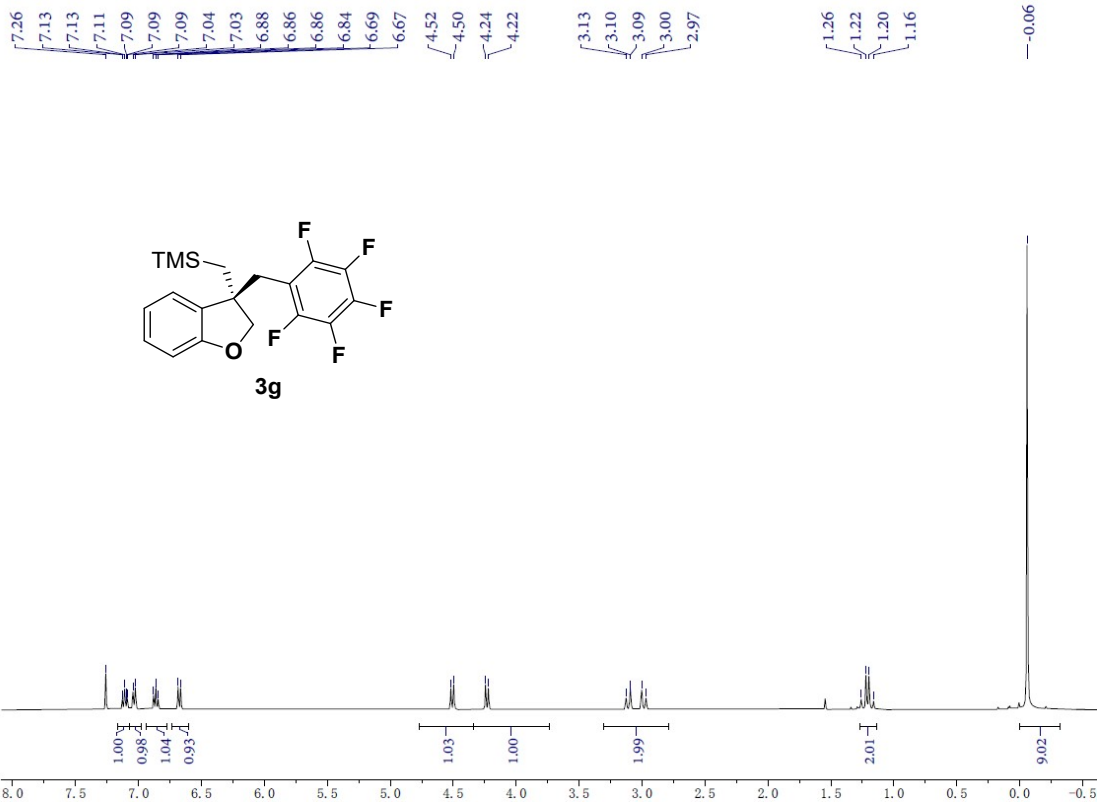

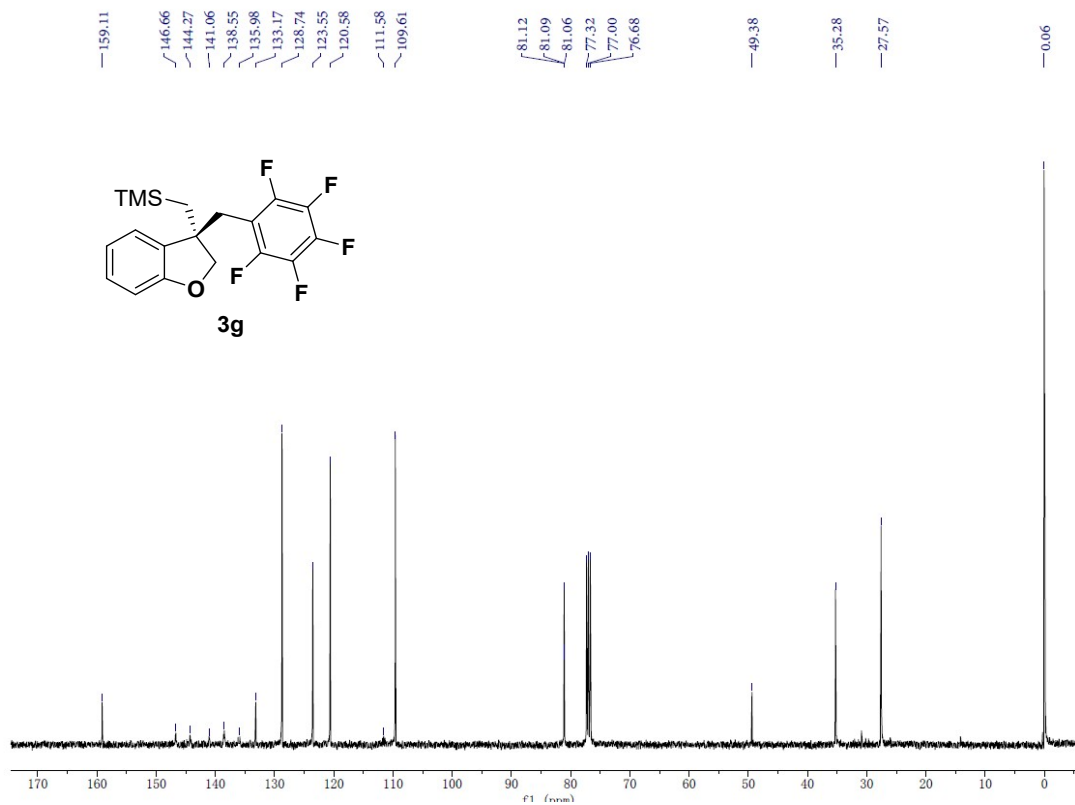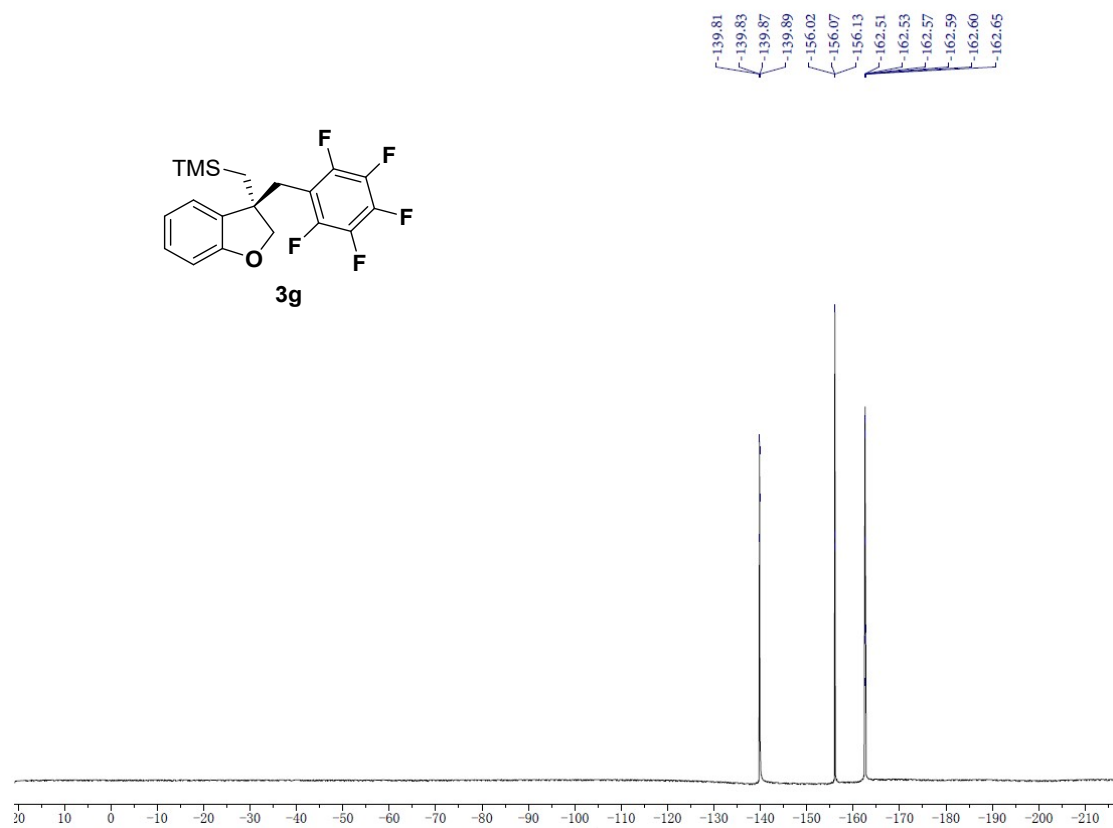

<Chromatogram>

mV

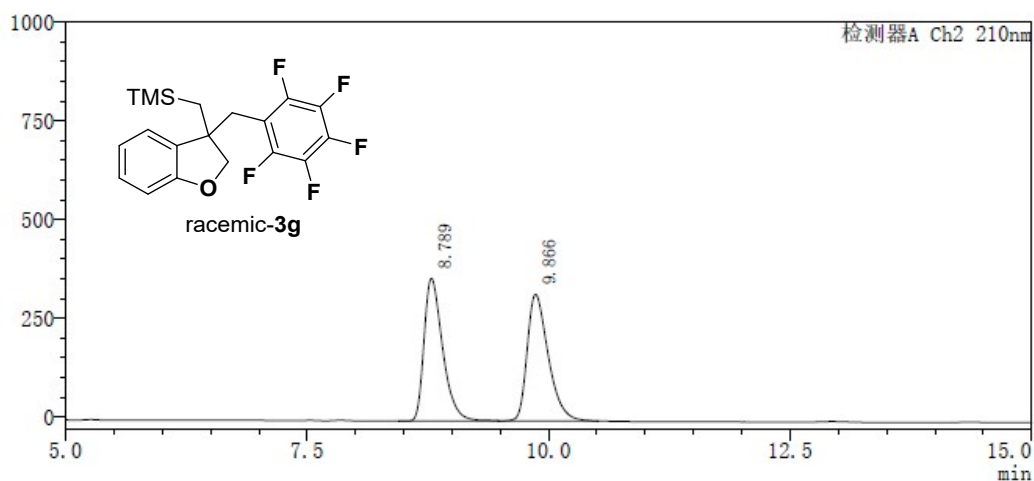

<Peak Table>

检测器A Ch2 210nm

| No.   | Ret. Time (min) | Height | Height% | Area    | Area%   |
|-------|-----------------|--------|---------|---------|---------|
| 1     | 8.789           | 361357 | 53.007  | 4826023 | 49.799  |
| 2     | 9.866           | 320352 | 46.993  | 4864993 | 50.201  |
| Total |                 | 681709 | 100.000 | 9691016 | 100.000 |

<Chromatogram>

mV

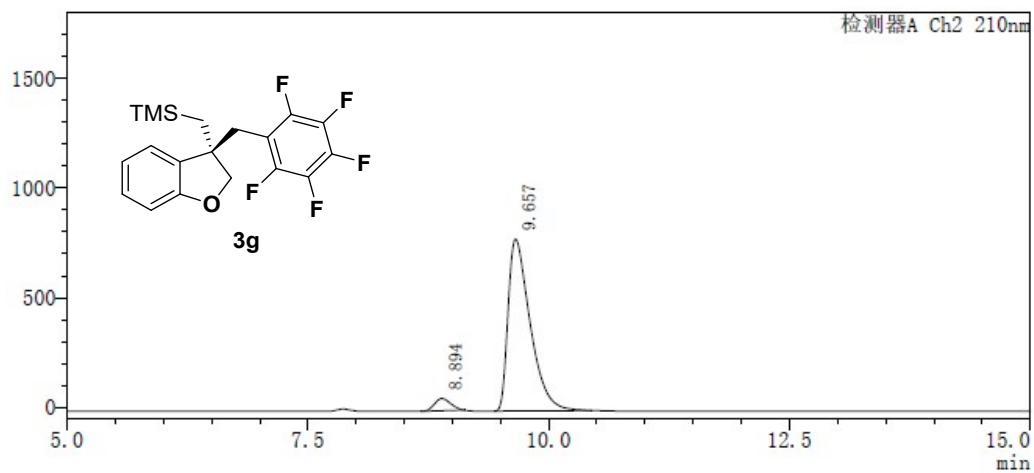

<Peak Table>

检测器A Ch2 210nm

| No.   | Ret. Time (min) | Height | Height% | Area     | Area%   |
|-------|-----------------|--------|---------|----------|---------|
| 1     | 8.894           | 55699  | 6.628   | 652953   | 4.964   |
| 2     | 9.657           | 784612 | 93.372  | 12500499 | 95.036  |
| Total |                 | 840310 | 100.000 | 13153452 | 100.000 |

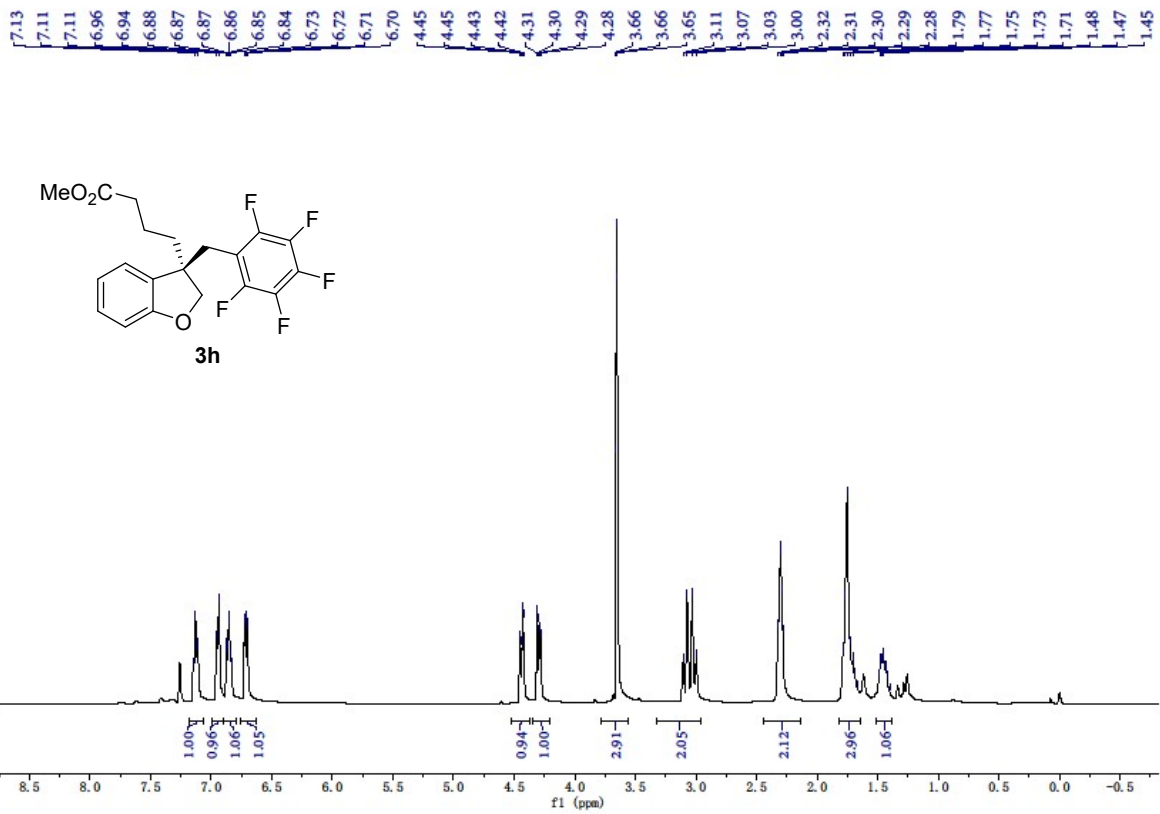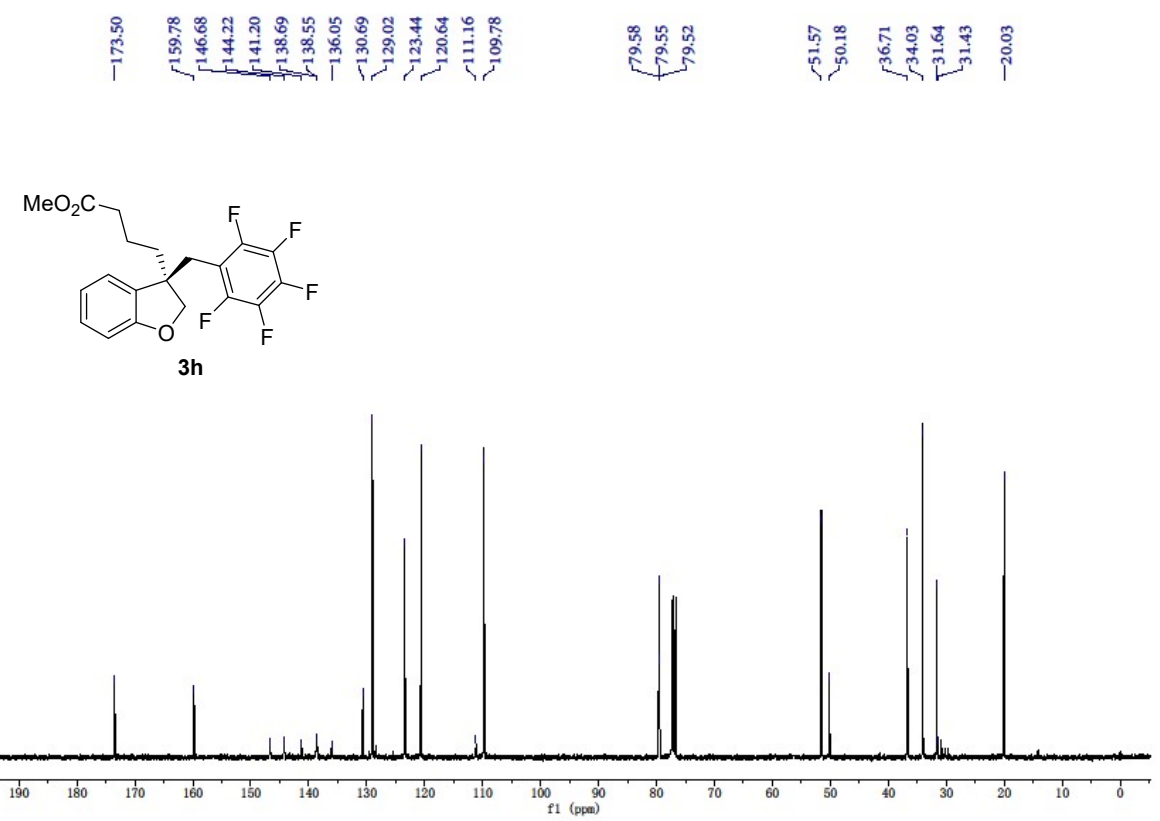

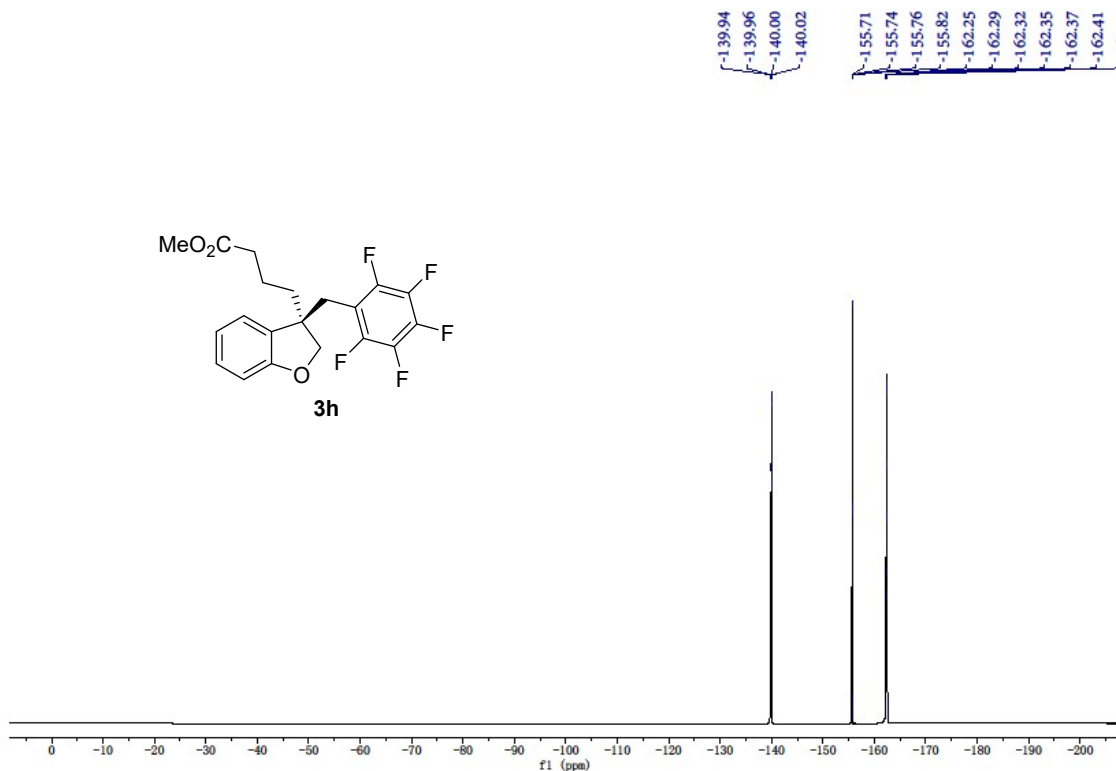

<Chromatogram>

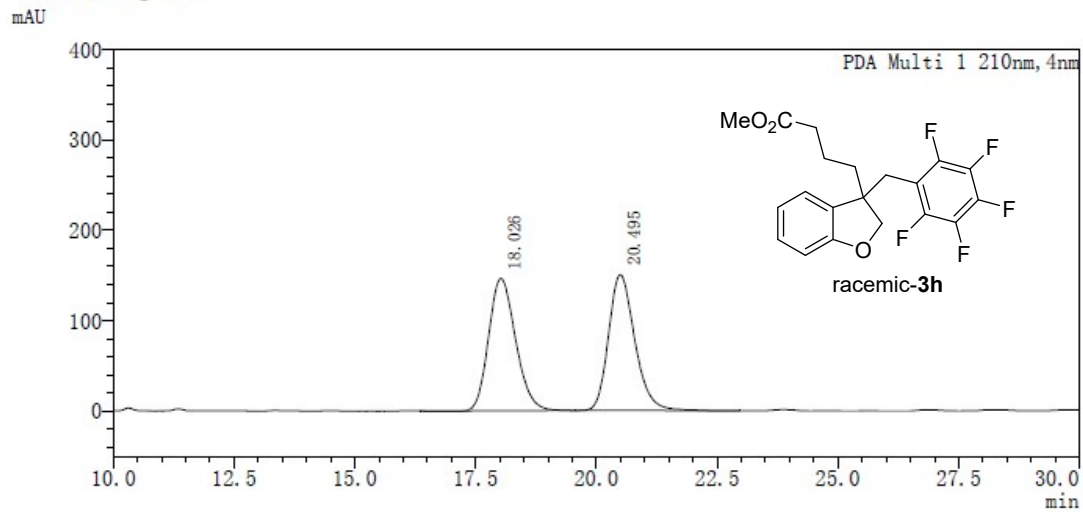

<Peak Table>

PDA Ch1 210nm

| No.   | Ret. Time (min) | Height | Height% | Area     | Area%   |
|-------|-----------------|--------|---------|----------|---------|
| 1     | 18.026          | 146415 | 49.335  | 5676632  | 49.981  |
| 2     | 20.495          | 150362 | 50.665  | 5680863  | 50.019  |
| Total |                 | 296777 | 100.000 | 11357495 | 100.000 |



<Chromatogram>

mAU

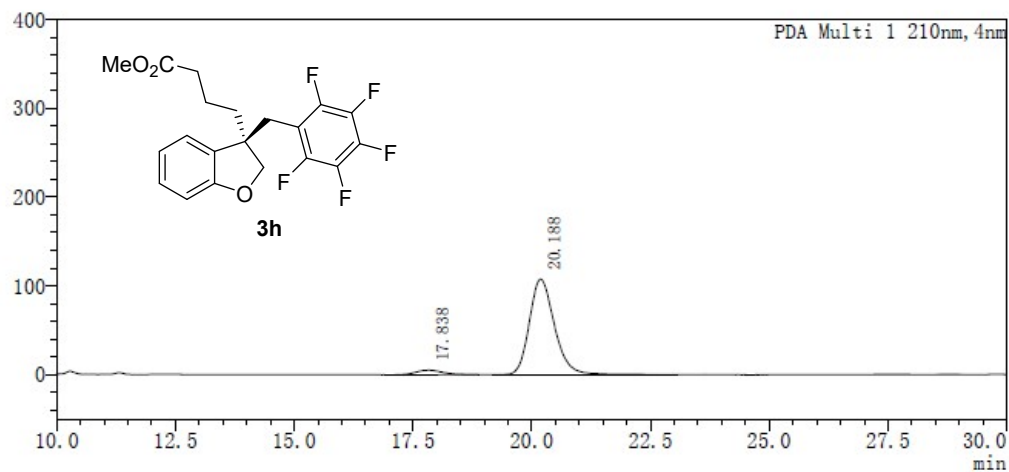

<Peak Table>

PDA Ch1 210nm

| No.   | Ret. Time (min) | Height | Height% | Area    | Area%   |
|-------|-----------------|--------|---------|---------|---------|
| 1     | 17.838          | 5408   | 4.780   | 207684  | 4.979   |
| 2     | 20.188          | 107726 | 95.220  | 3963353 | 95.021  |
| Total |                 | 113133 | 100.000 | 4171036 | 100.000 |

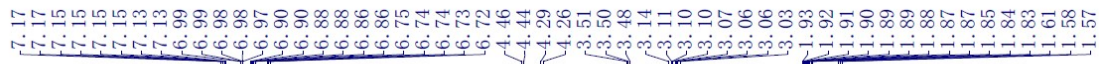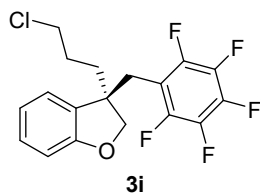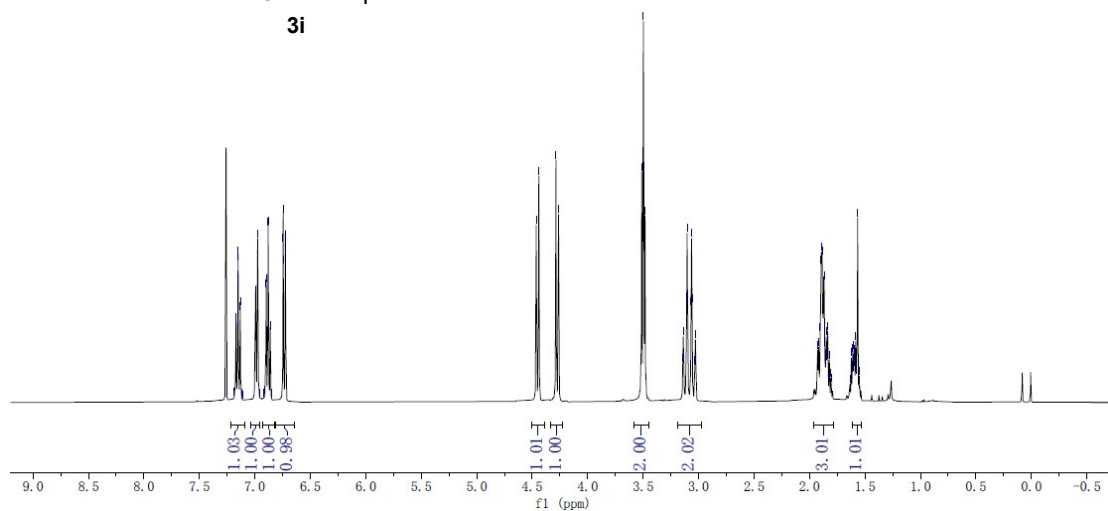

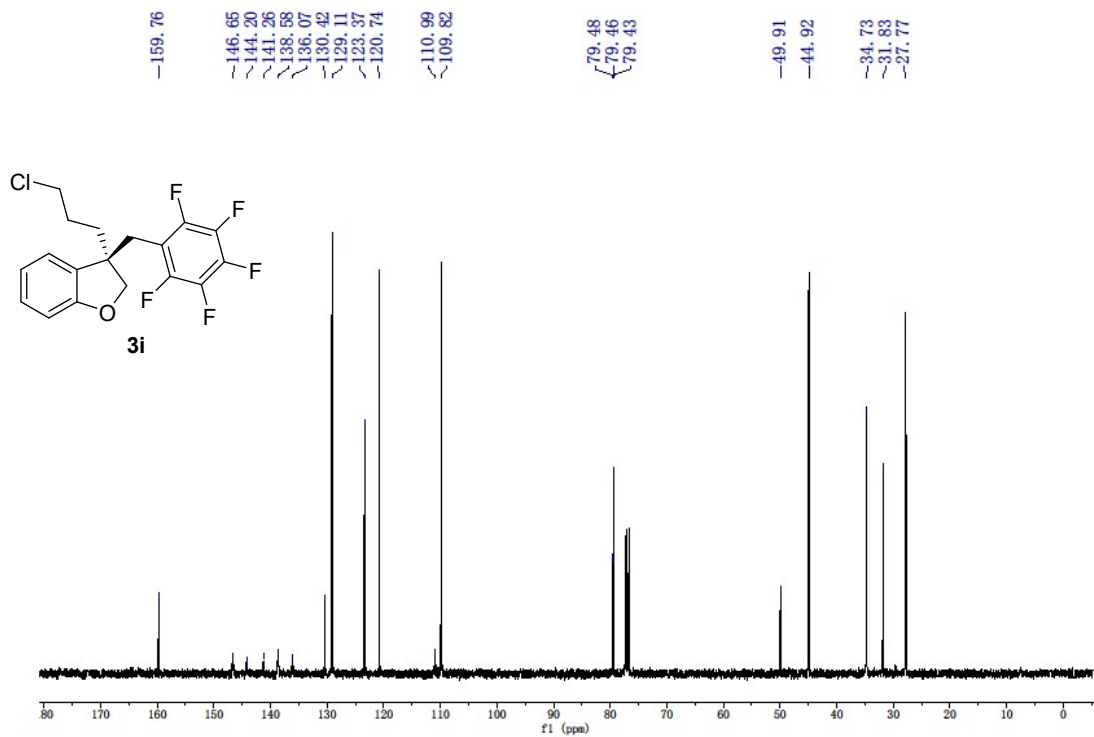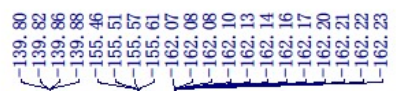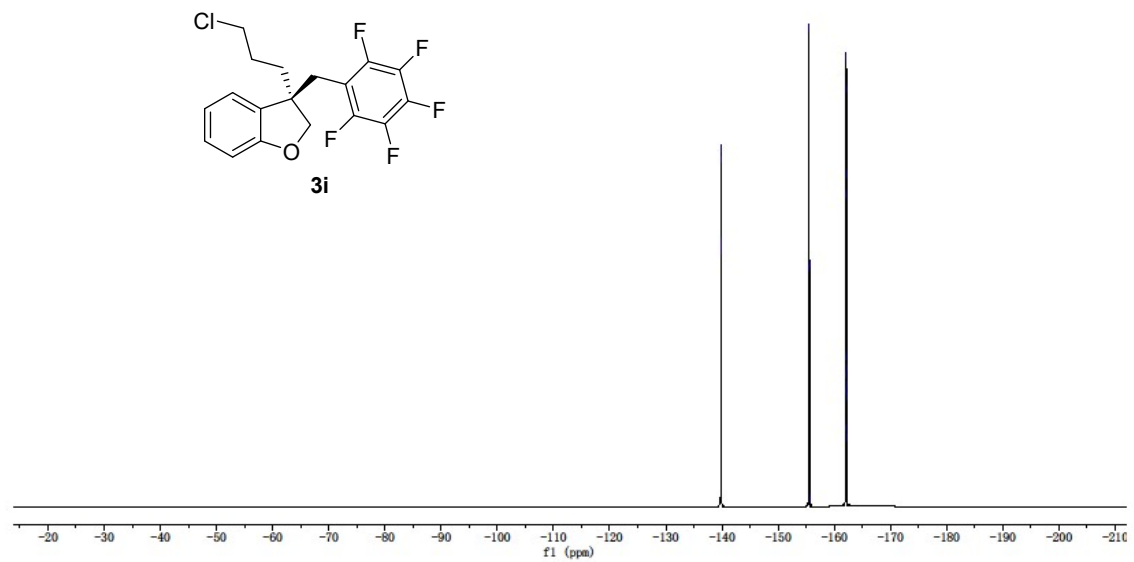

<Chromatogram>

mV

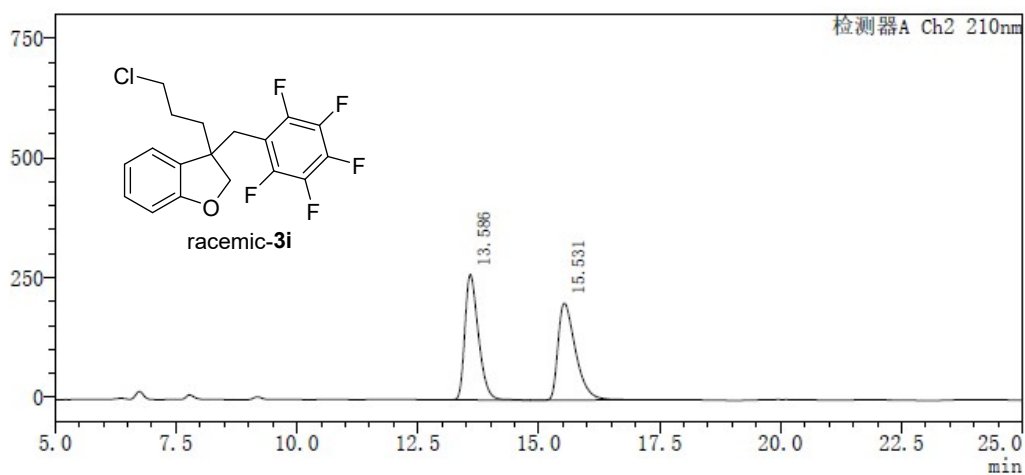

<Peak Table>

检测器A Ch2 210nm

| No.   | Ret. Time (min) | Height | Height% | Area     | Area%   |
|-------|-----------------|--------|---------|----------|---------|
| 1     | 13.586          | 262008 | 56.404  | 5114316  | 49.978  |
| 2     | 15.531          | 202511 | 43.596  | 5118815  | 50.022  |
| Total |                 | 464519 | 100.000 | 10233131 | 100.000 |

<Chromatogram>

mV

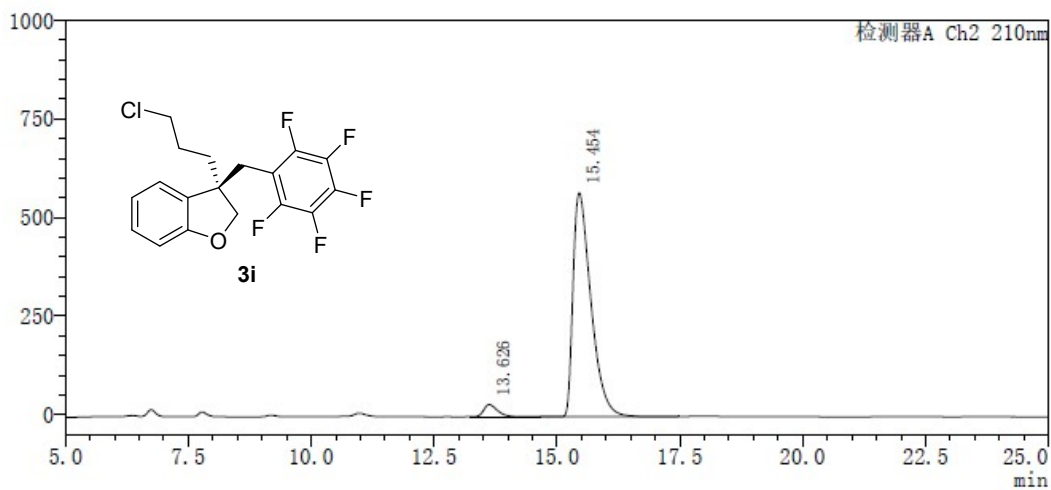

<Peak Table>

检测器A Ch2 210nm

| No.   | Ret. Time (min) | Height | Height% | Area     | Area%   |
|-------|-----------------|--------|---------|----------|---------|
| 1     | 13.626          | 31179  | 5.209   | 611807   | 4.080   |
| 2     | 15.454          | 567439 | 94.791  | 14383470 | 95.920  |
| Total |                 | 598618 | 100.000 | 14995277 | 100.000 |

7.15  
7.15  
7.14  
7.14  
7.13  
7.12  
7.12  
6.95  
6.95  
6.95  
6.93  
6.93  
6.88  
6.86  
6.74  
6.72  
4.46  
4.43  
4.29  
4.27  
3.52  
3.52  
3.51  
3.50  
3.49  
3.48  
3.09  
3.08  
3.08  
3.05  
3.04  
3.04  
1.79  
1.78  
1.78  
1.77  
1.76  
1.75  
1.75  
1.74  
1.55  
1.54  
1.29

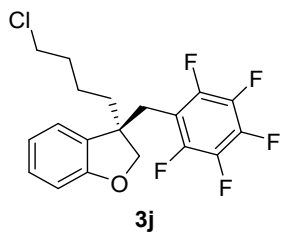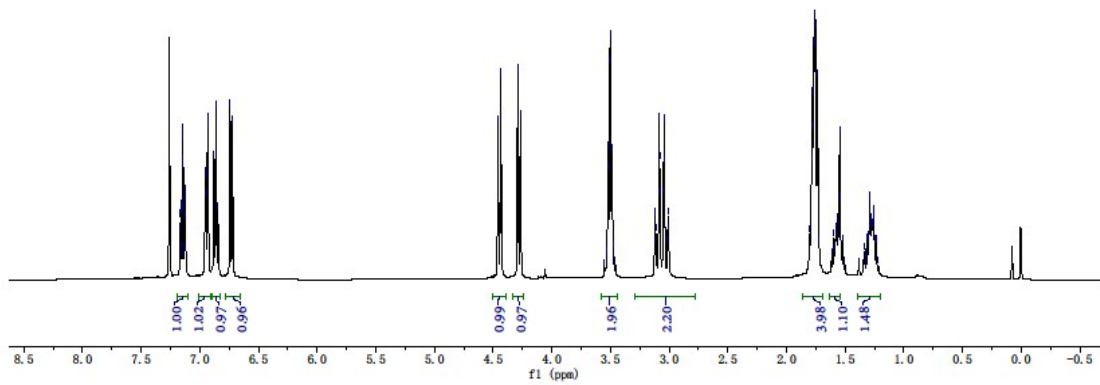

159.74  
146.65  
144.19  
141.19  
138.67  
136.04  
130.87  
128.99  
123.33  
120.63  
111.16  
109.77  
79.69  
79.66  
79.64  
50.19  
44.50  
36.60  
32.81  
31.61  
21.86

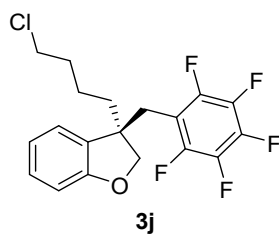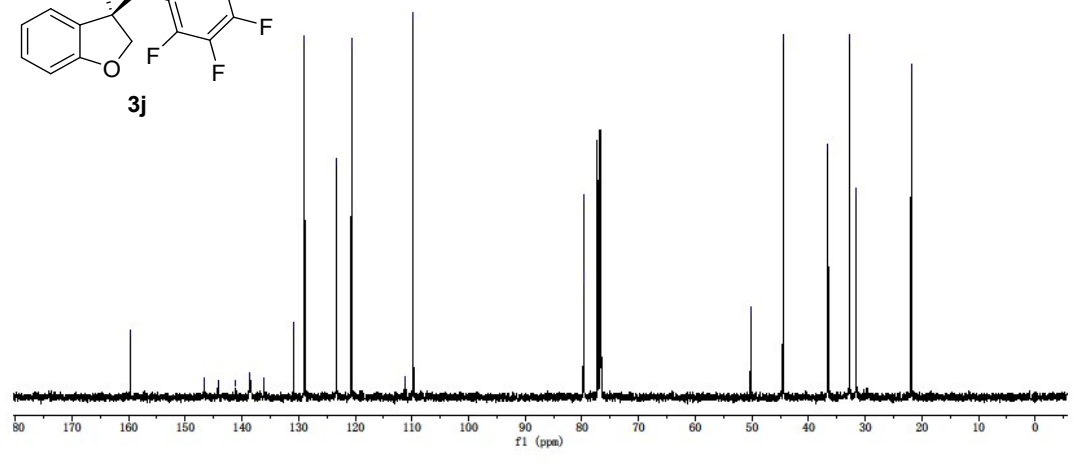

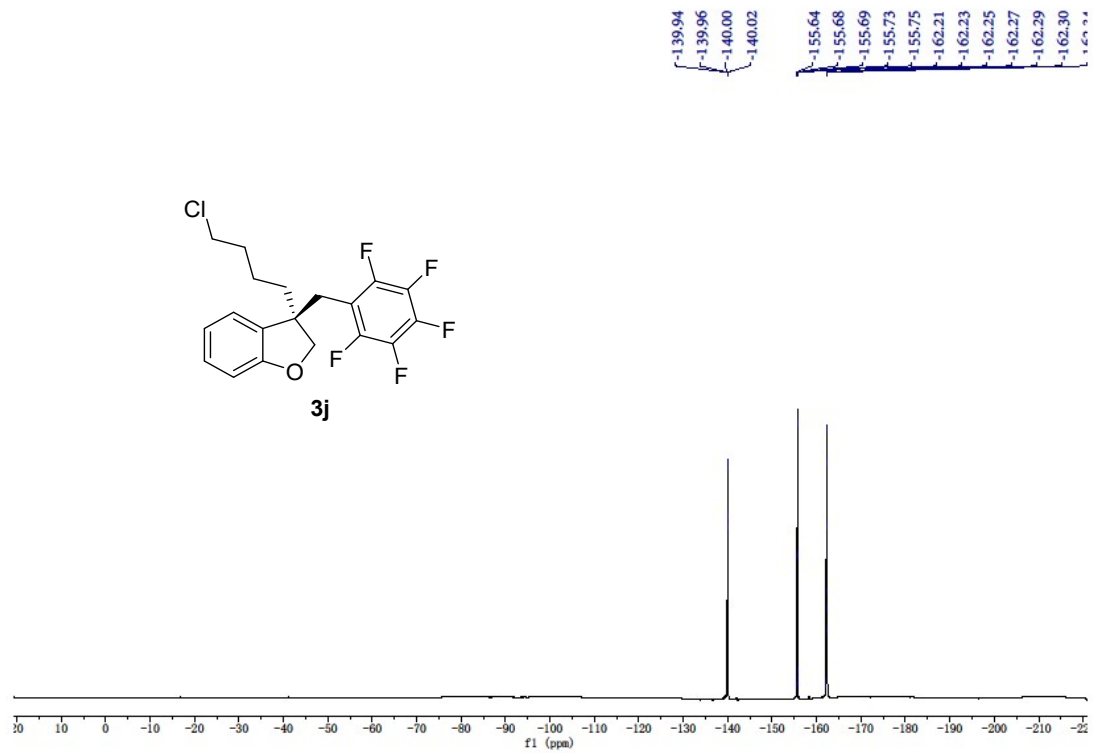

<Chromatogram>

mV

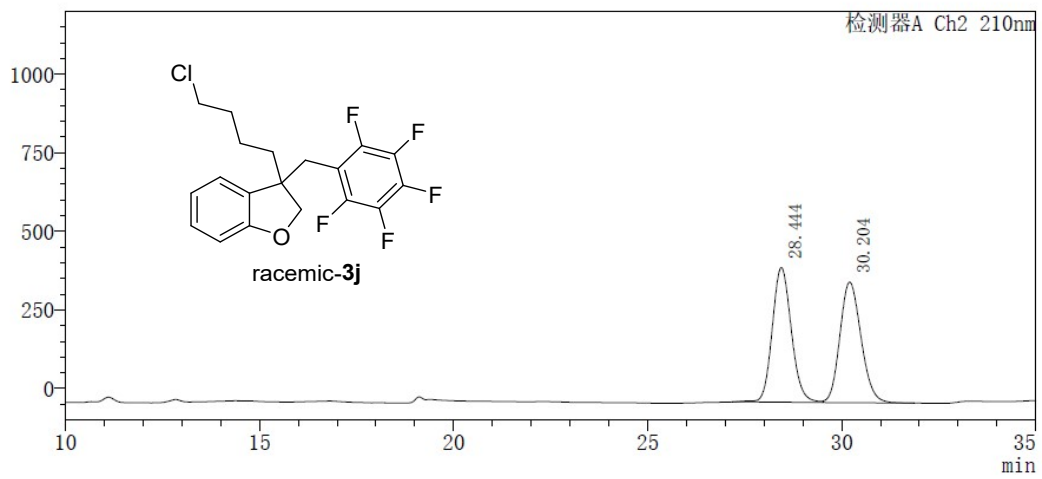

<Peak Table>

检测器A Ch2 210nm

| No.   | Ret. Time (min) | Height | Height% | Area     | Area%   |
|-------|-----------------|--------|---------|----------|---------|
| 1     | 28.444          | 428489 | 52.757  | 14702874 | 50.245  |
| 2     | 30.204          | 383701 | 47.243  | 14559552 | 49.755  |
| Total |                 | 812190 | 100.000 | 29262426 | 100.000 |

<Chromatogram>

mV

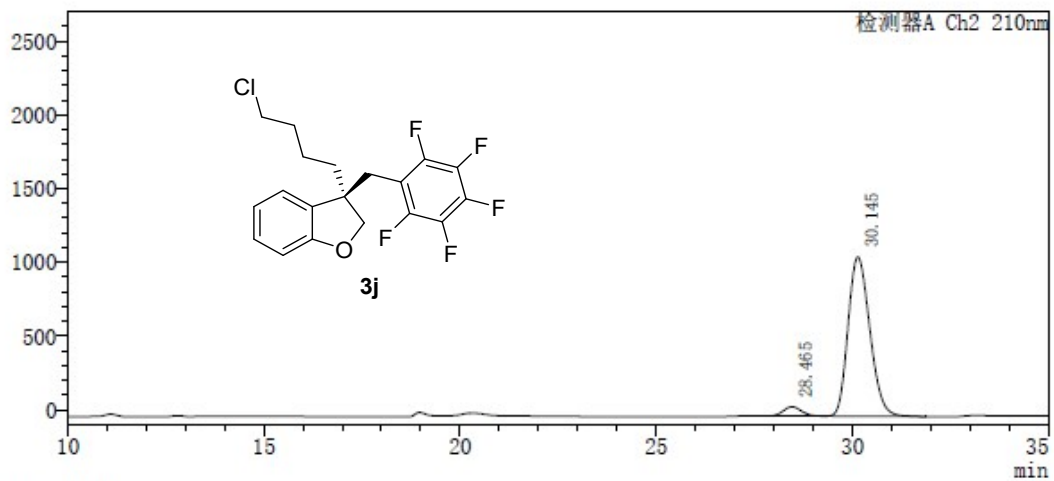

<Peak Table>

检测器A Ch2 210nm

| No.   | Ret. Time (min) | Height  | Height% | Area     | Area%   |
|-------|-----------------|---------|---------|----------|---------|
| 1     | 28.465          | 63231   | 5.533   | 2026910  | 4.636   |
| 2     | 30.145          | 1079487 | 94.467  | 41696622 | 95.364  |
| Total |                 | 1142718 | 100.000 | 43723533 | 100.000 |

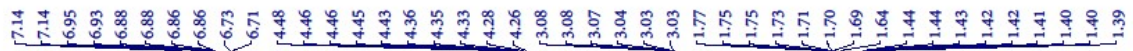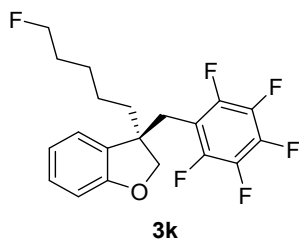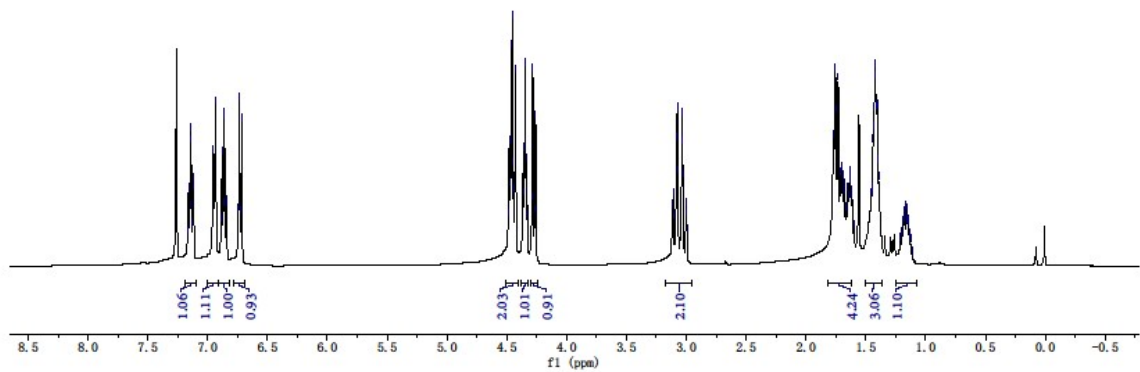

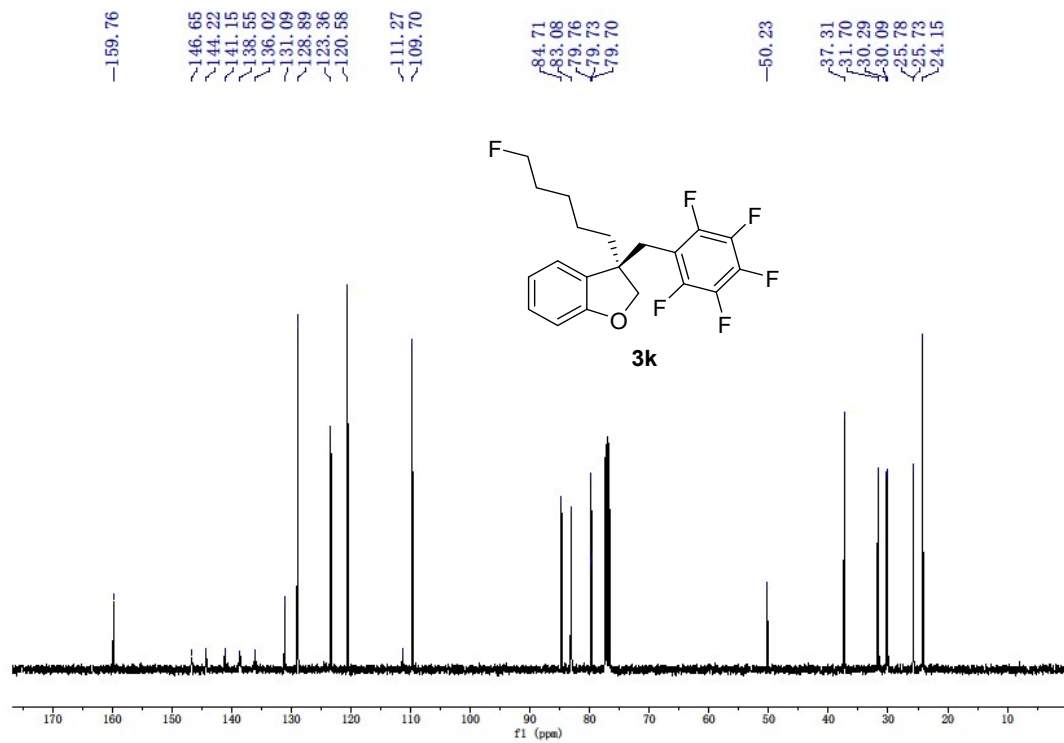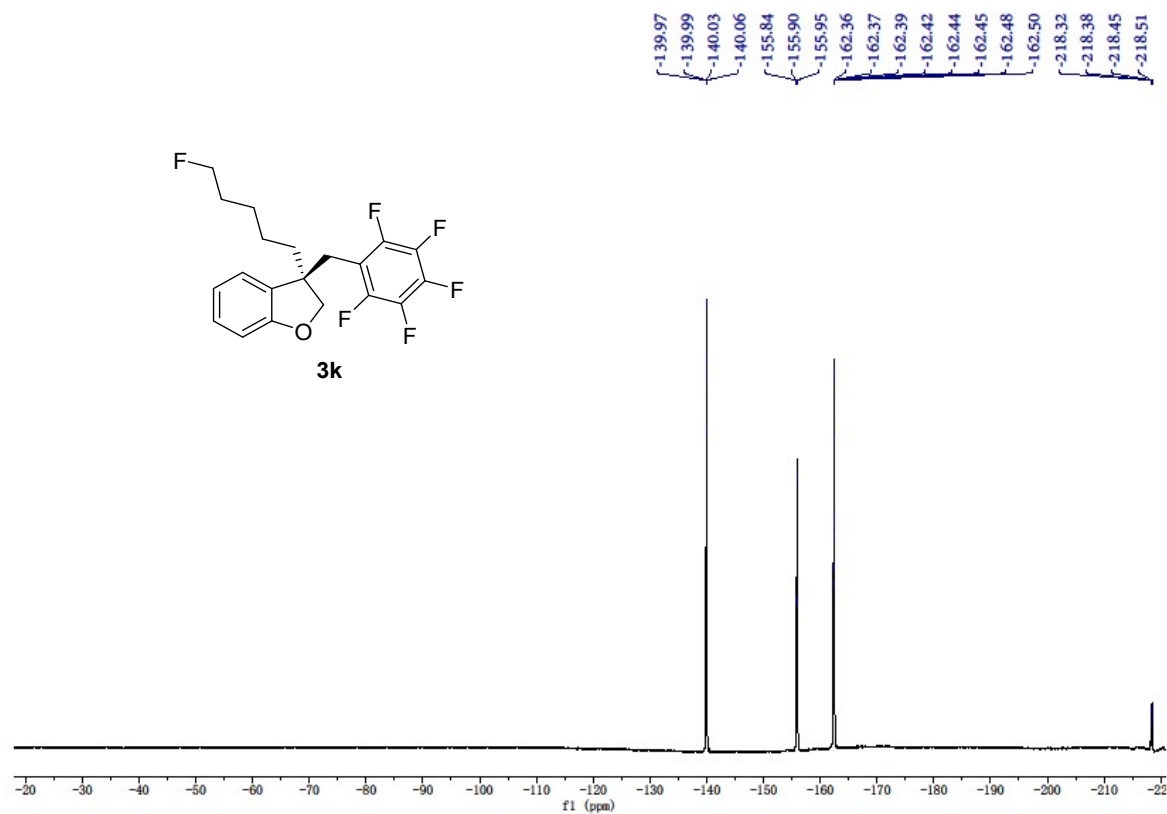

<Chromatogram>

mV

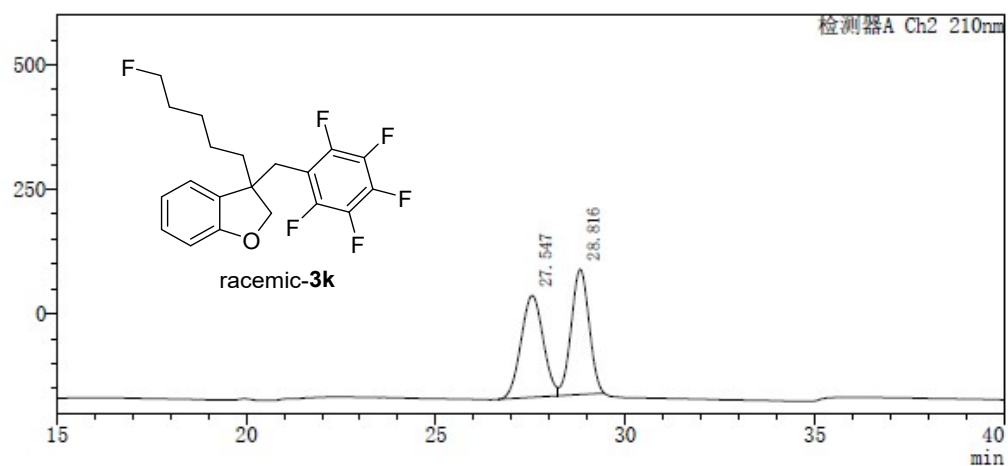

<Peak Table>

检测器A Ch2 210nm

| No.   | Ret. Time (min) | Height | Height% | Area     | Area%   |
|-------|-----------------|--------|---------|----------|---------|
| 1     | 27.547          | 204236 | 44.809  | 8320998  | 50.193  |
| 2     | 28.816          | 251552 | 55.191  | 8256943  | 49.807  |
| Total |                 | 455788 | 100.000 | 16577941 | 100.000 |

<Chromatogram>

mV

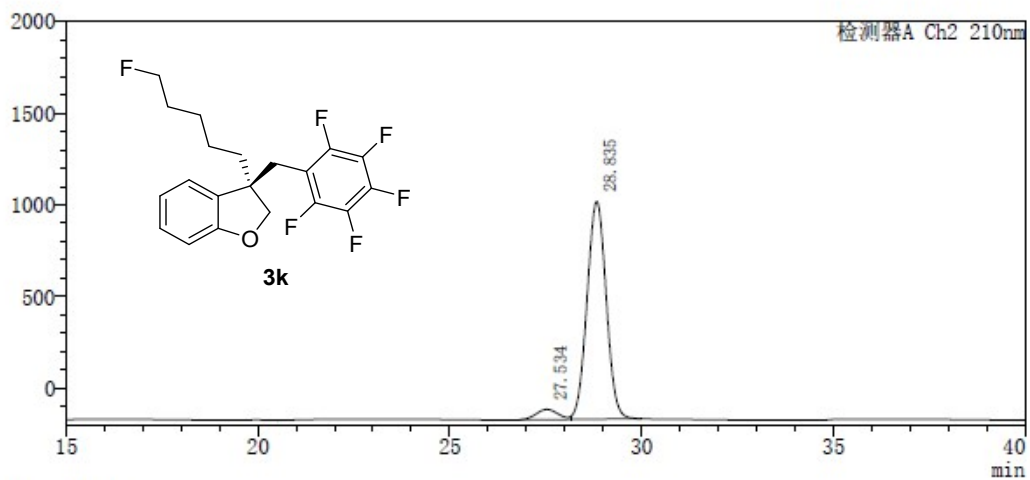

<Peak Table>

检测器A Ch2 210nm

| No.   | Ret. Time (min) | Height  | Height% | Area     | Area%   |
|-------|-----------------|---------|---------|----------|---------|
| 1     | 27.534          | 56083   | 4.517   | 2257787  | 5.197   |
| 2     | 28.835          | 1185611 | 95.483  | 41182564 | 94.803  |
| Total |                 | 1241694 | 100.000 | 43440351 | 100.000 |



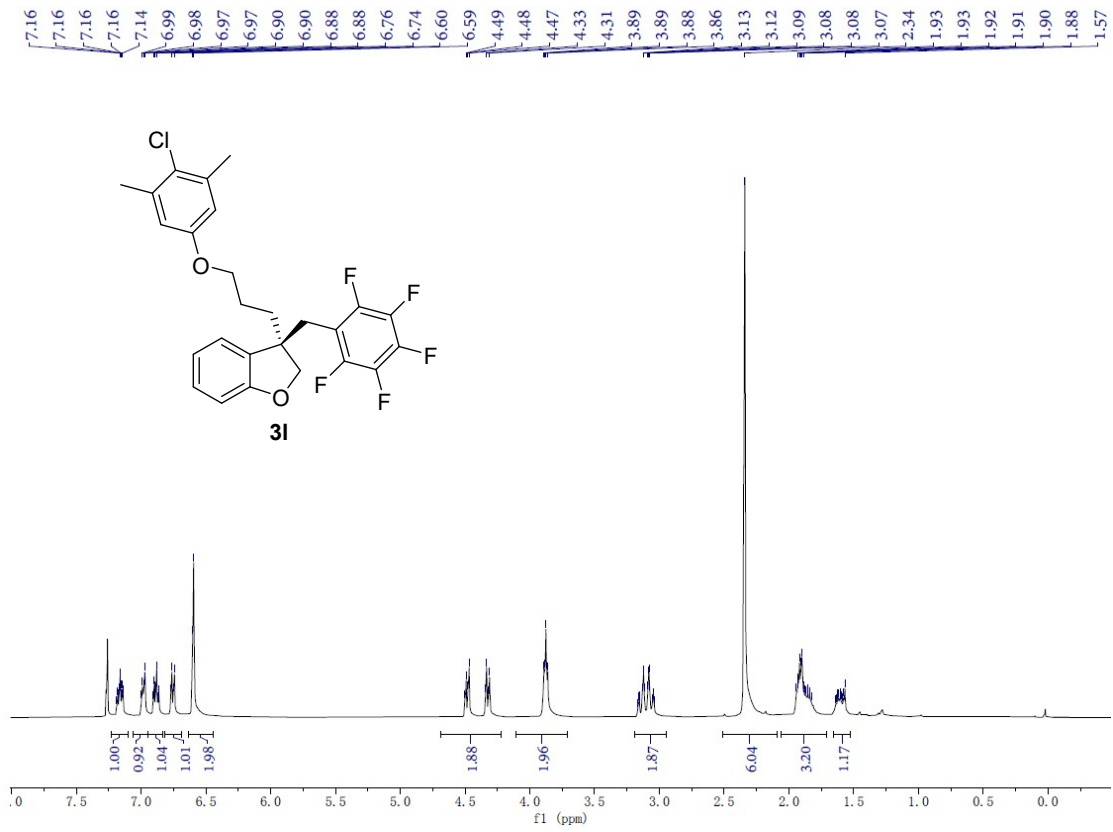

- ~159.80
- ~156.60
- ~146.64
- ~144.22
- ~138.54
- ~137.06
- ~136.04
- ~130.71
- ~129.02
- ~126.22
- ~123.40
- ~120.66
- ~114.40
- ~111.14
- ~111.10
- ~109.78
- 79.63
- 79.60
- 79.57
- 67.77
- 50.04
- 33.75
- 31.71
- 24.60
- 20.86

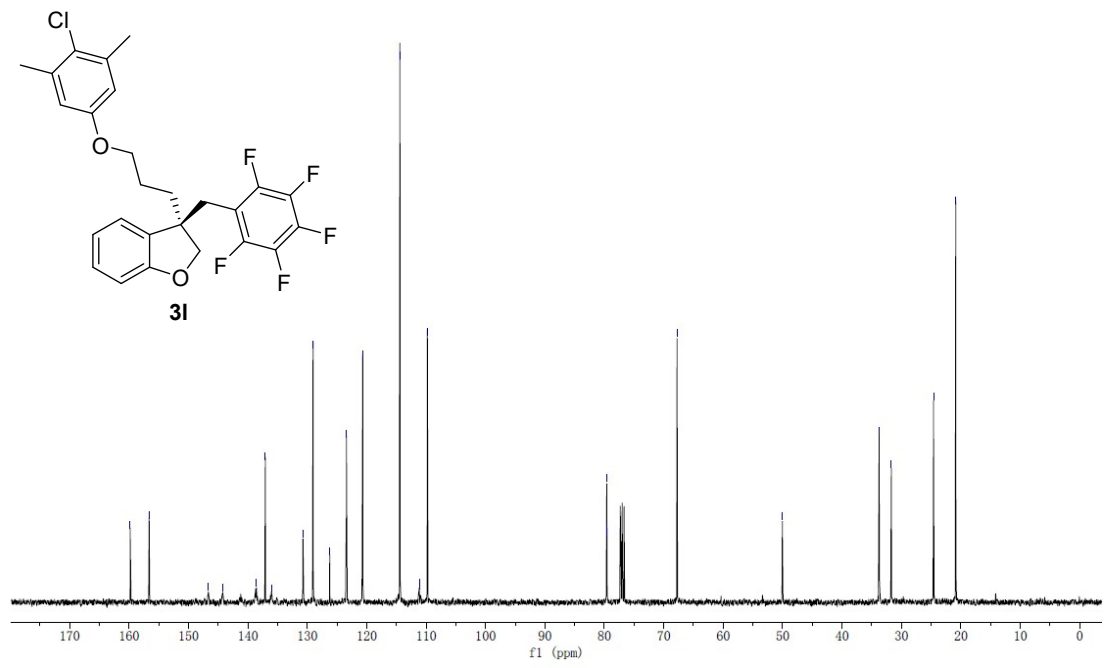

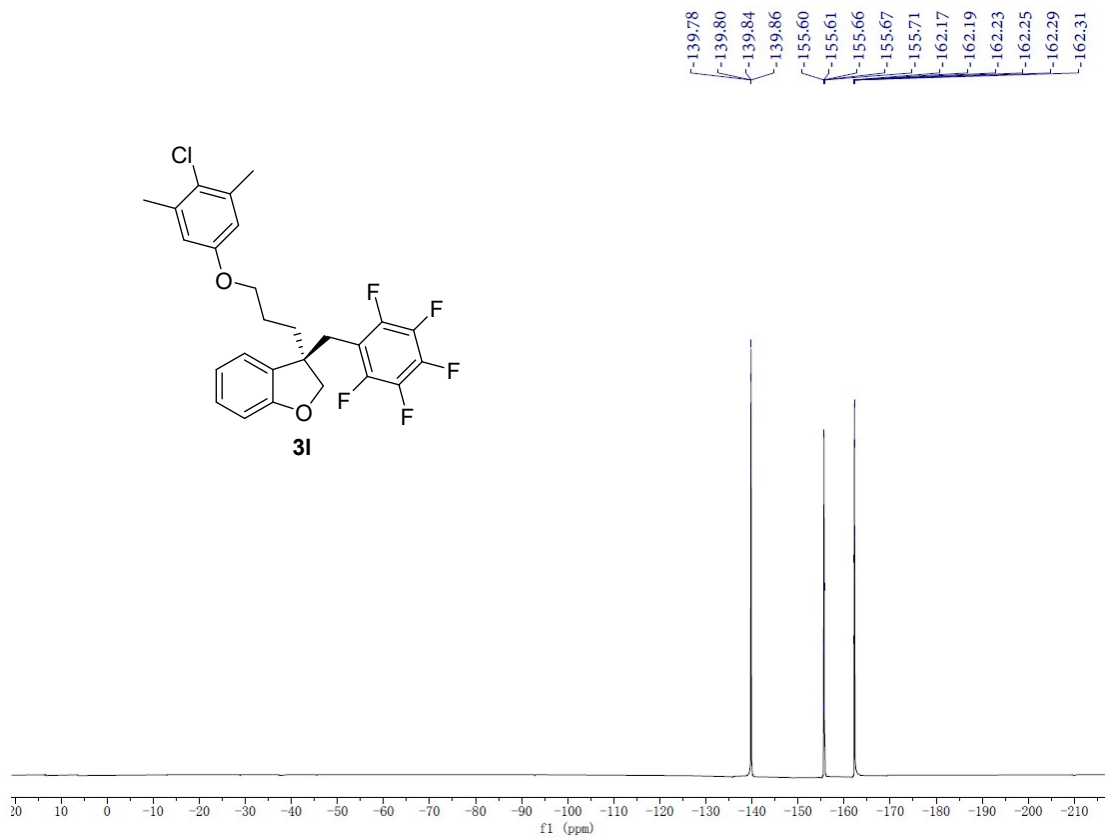

<Chromatogram>

mAU

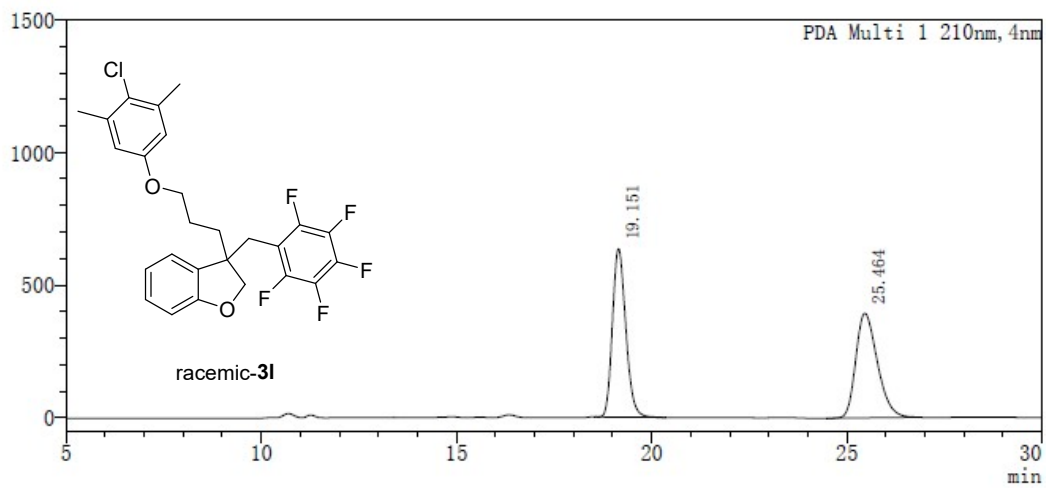

<Peak Table>

PDA Ch1 210nm

| No.   | Ret. Time (min) | Height  | Height% | Area     | Area%   |
|-------|-----------------|---------|---------|----------|---------|
| 1     | 19.151          | 634879  | 61.686  | 15131763 | 49.937  |
| 2     | 25.464          | 394330  | 38.314  | 15169993 | 50.063  |
| Total |                 | 1029209 | 100.000 | 30301756 | 100.000 |



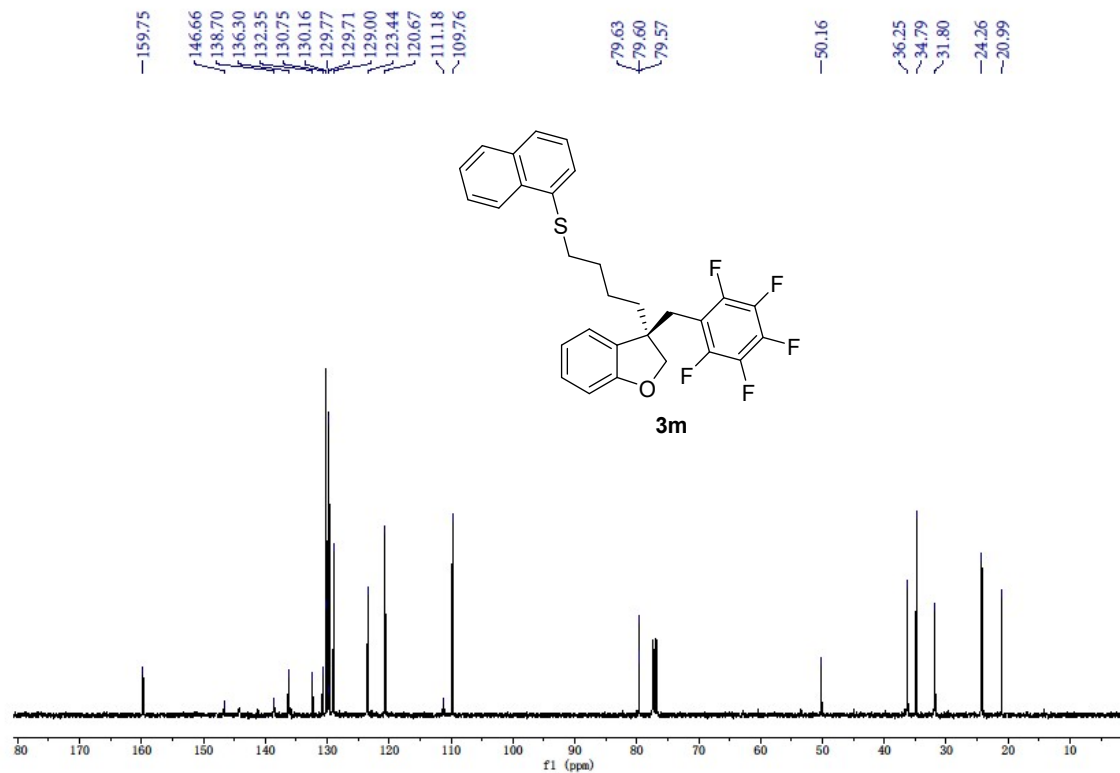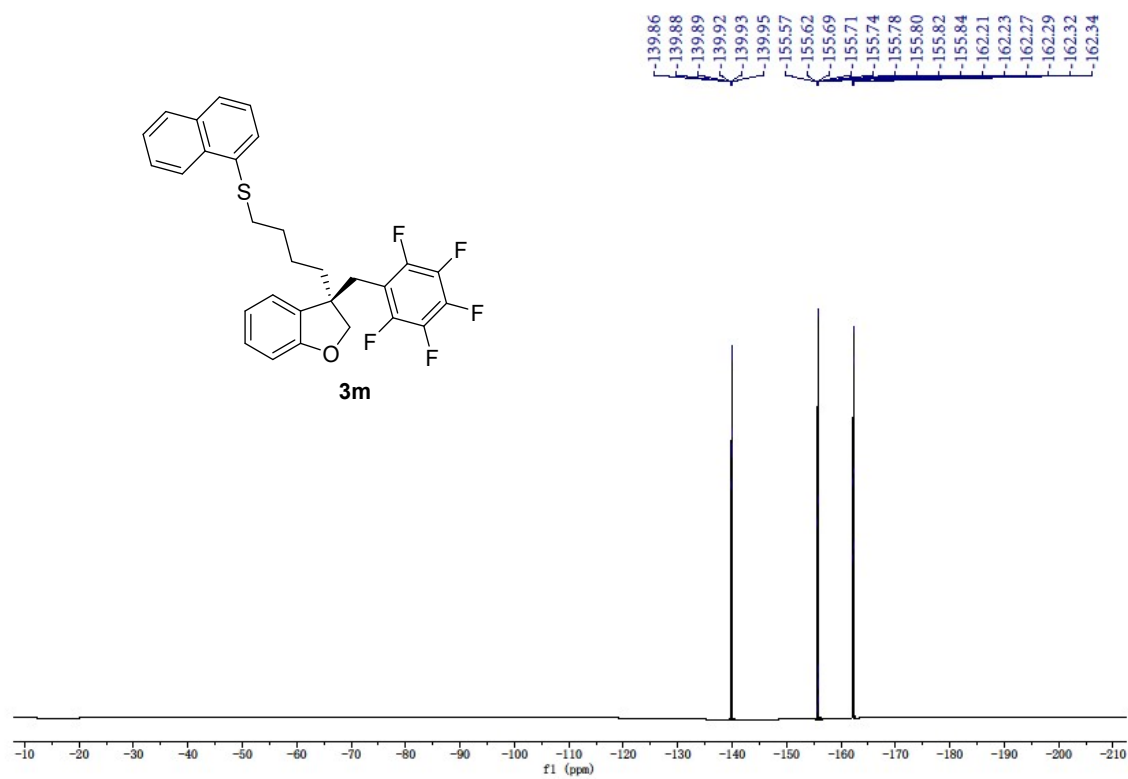

<Chromatogram>

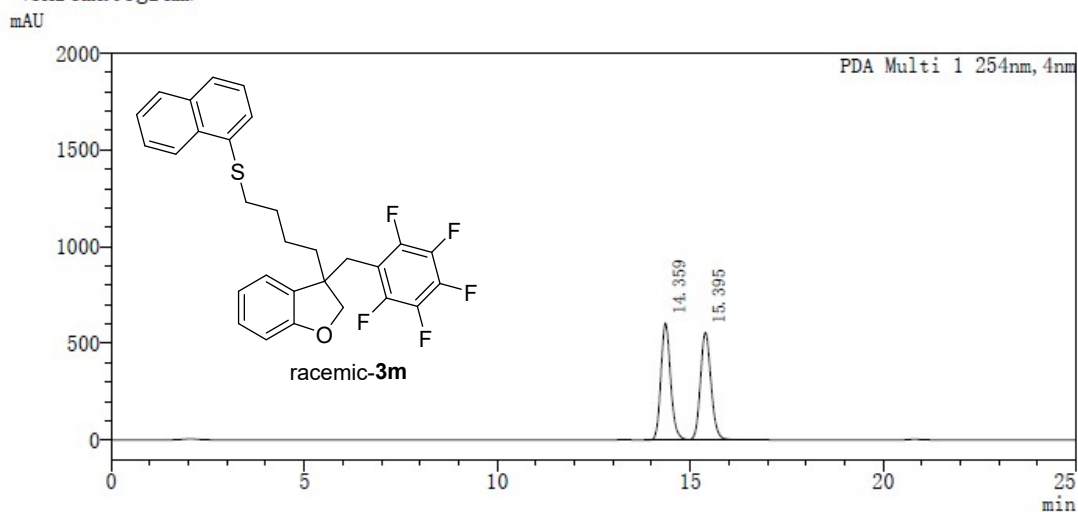

<Peak Table>

PDA Ch1 254nm

| No.   | Ret. Time(min) | Height  | Height% | Area     | Area%   |
|-------|----------------|---------|---------|----------|---------|
| 1     | 14.359         | 603764  | 52.064  | 10600889 | 49.700  |
| 2     | 15.395         | 555894  | 47.936  | 10728756 | 50.300  |
| Total |                | 1159657 | 100.000 | 21329645 | 100.000 |

<Chromatogram>

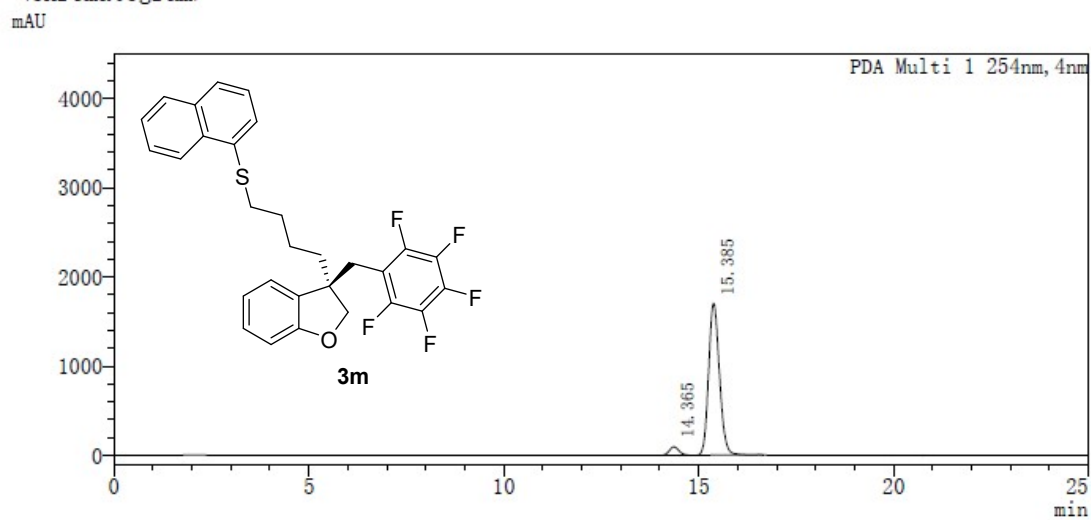

<Peak Table>

PDA Ch1 254nm

| No.   | Ret. Time(min) | Height  | Height% | Area     | Area%   |
|-------|----------------|---------|---------|----------|---------|
| 1     | 14.365         | 94357   | 5.257   | 1598394  | 4.631   |
| 2     | 15.385         | 1700593 | 94.743  | 32915480 | 95.369  |
| Total |                | 1794950 | 100.000 | 34513874 | 100.000 |

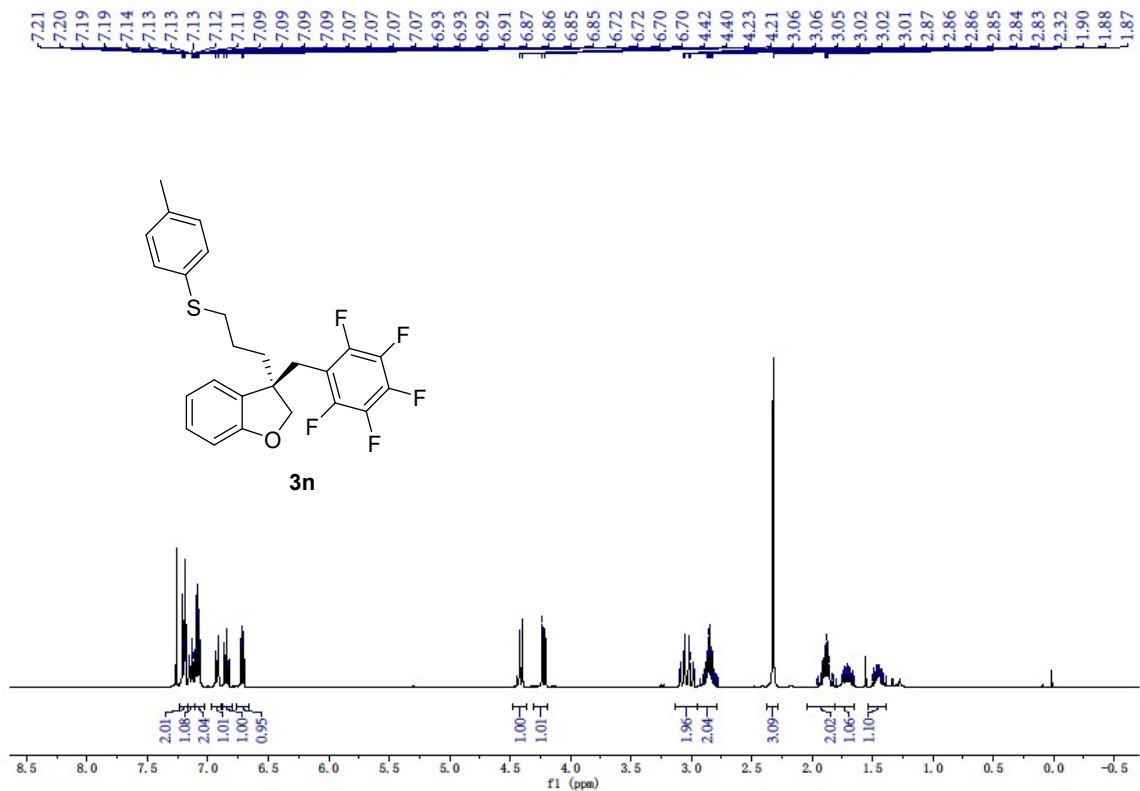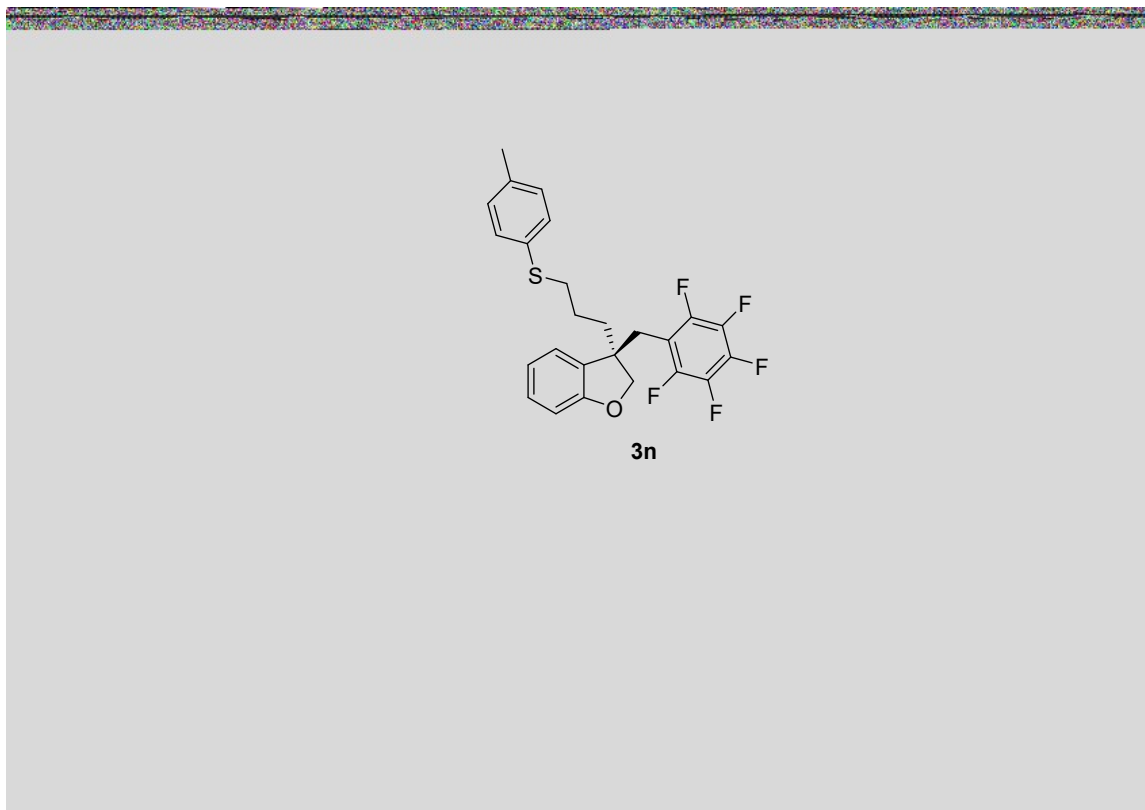

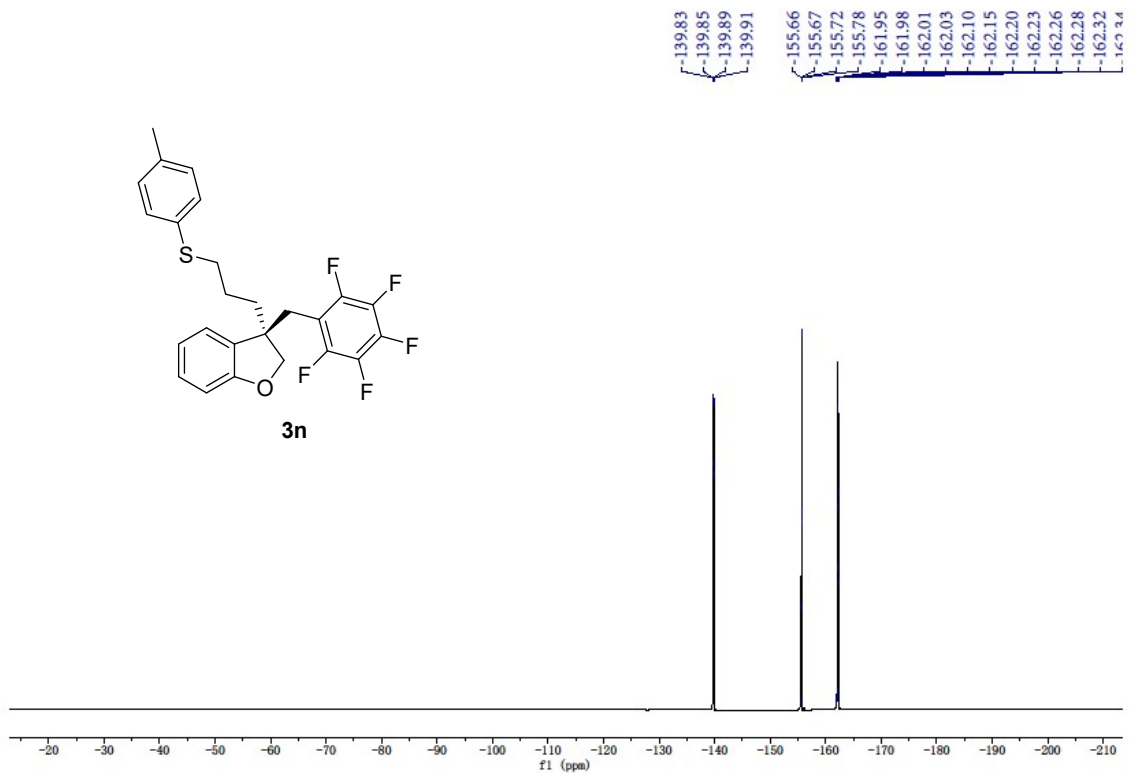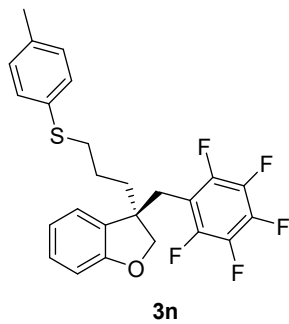

<Chromatogram>

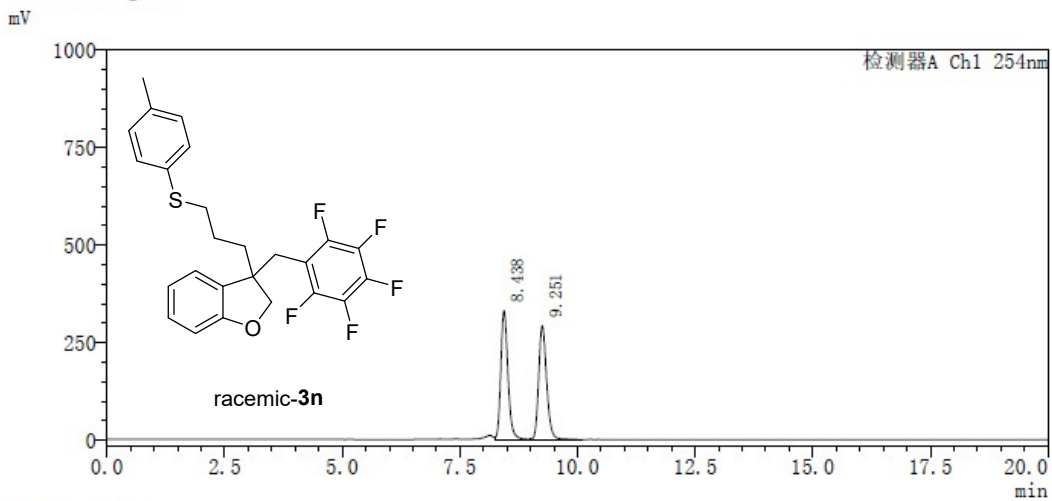

<Peak Table>

检测器A Ch1 254nm

| No.   | Ret. Time (min) | Height | Height% | Area    | Area%   |
|-------|-----------------|--------|---------|---------|---------|
| 1     | 8.438           | 330374 | 53.144  | 3518989 | 50.430  |
| 2     | 9.251           | 291282 | 46.856  | 3458943 | 49.570  |
| Total |                 | 621656 | 100.000 | 6977932 | 100.000 |

<Chromatogram>

mV

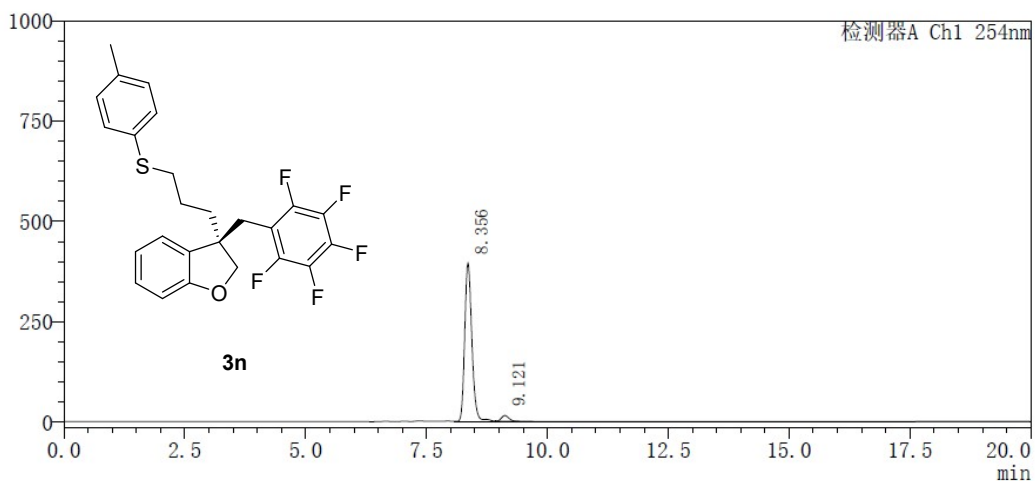

<Peak Table>

检测器A Ch1 254nm

| No.   | Ret. Time (min) | Height | Height% | Area    | Area%   |
|-------|-----------------|--------|---------|---------|---------|
| 1     | 8.356           | 395550 | 96.540  | 4264119 | 96.557  |
| 2     | 9.121           | 14176  | 3.460   | 152050  | 3.443   |
| Total |                 | 409726 | 100.000 | 4416169 | 100.000 |

7.13  
7.12  
7.10  
6.93  
6.91  
6.86  
6.84  
6.82  
6.71  
6.69  
4.42  
4.40  
4.28  
4.26  
4.26  
4.24  
4.23  
3.49  
3.47  
3.47  
3.45  
3.23  
3.21  
3.19  
3.09  
3.06  
3.06  
3.02  
2.99  
1.78  
1.77  
1.76  
1.75  
1.73  
1.55  
1.54  
1.53  
1.53  
1.51  
1.51  
1.49  
1.40  
1.13  
1.12

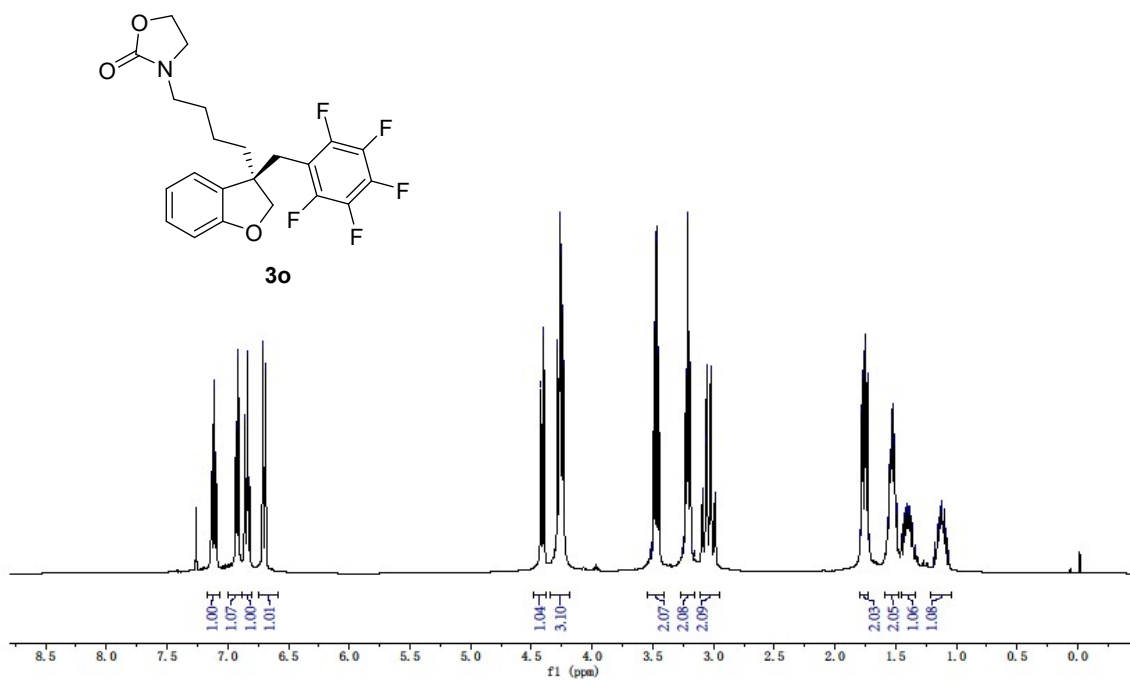



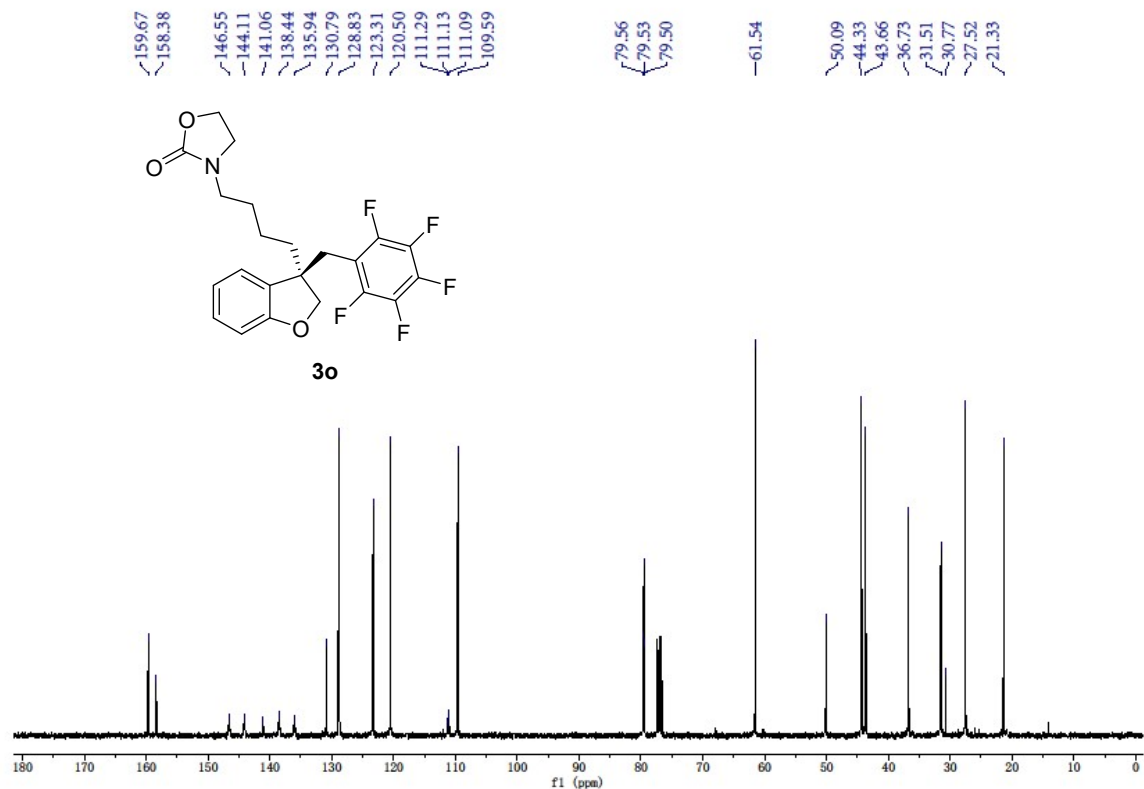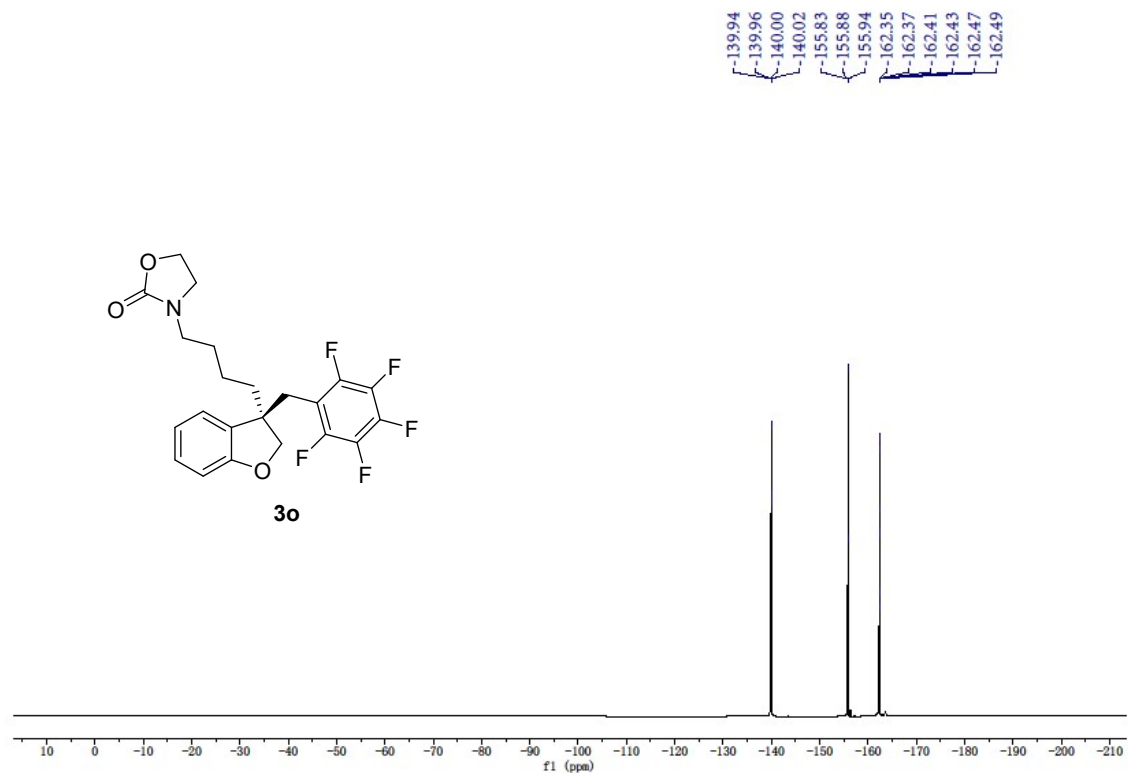

<Chromatogram>

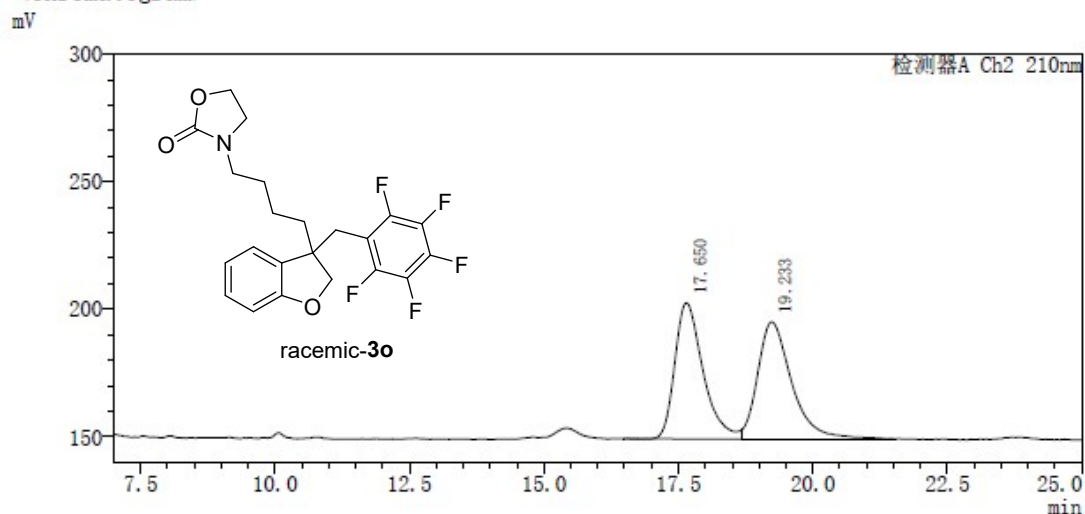

<Peak Table>

检测器A Ch2 210nm

| No.   | Ret. Time (min) | Height | Height% | Area    | Area%   |
|-------|-----------------|--------|---------|---------|---------|
| 1     | 17.650          | 53354  | 53.760  | 1951328 | 49.232  |
| 2     | 19.233          | 45890  | 46.240  | 2012238 | 50.768  |
| Total |                 | 99243  | 100.000 | 3963565 | 100.000 |

<Chromatogram>

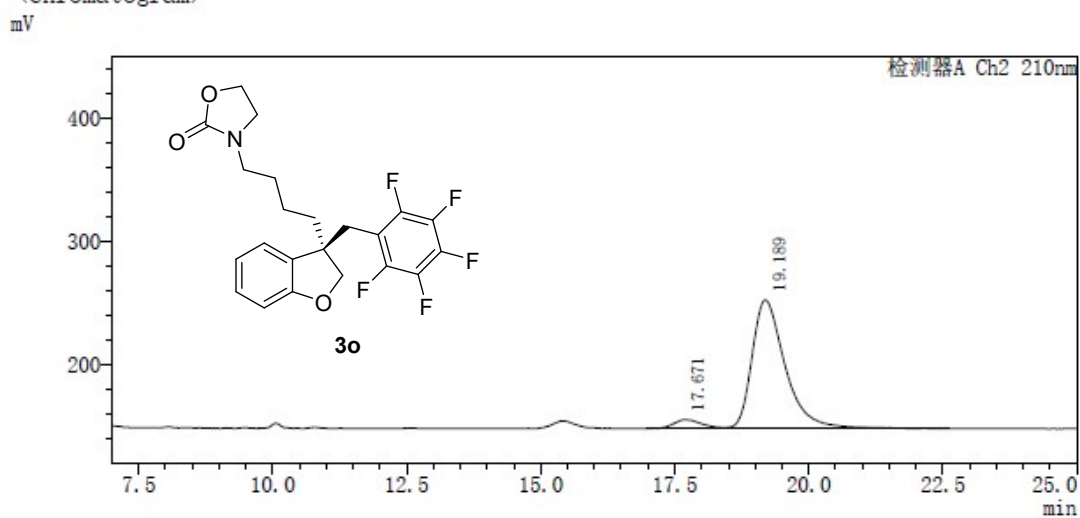

<Peak Table>

检测器A Ch2 210nm

| No.   | Ret. Time (min) | Height | Height% | Area    | Area%   |
|-------|-----------------|--------|---------|---------|---------|
| 1     | 17.671          | 7096   | 6.371   | 255826  | 5.398   |
| 2     | 19.189          | 104293 | 93.629  | 4483590 | 94.602  |
| Total |                 | 111390 | 100.000 | 4739416 | 100.000 |

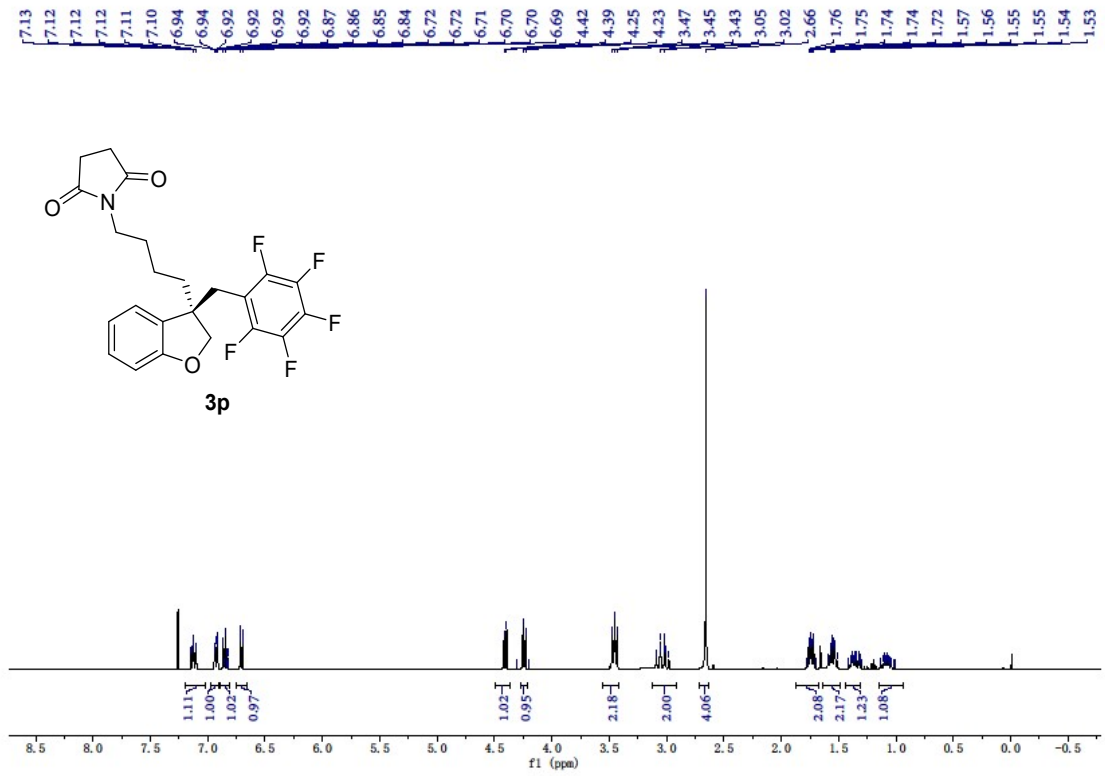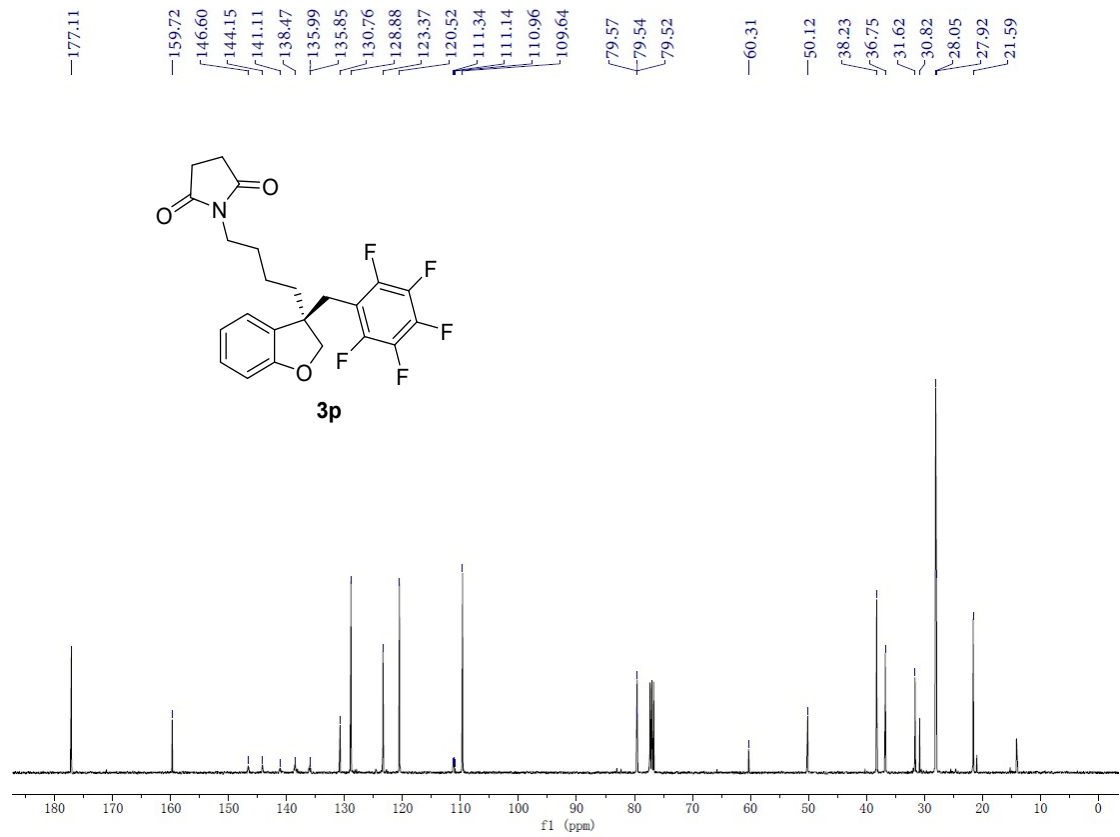

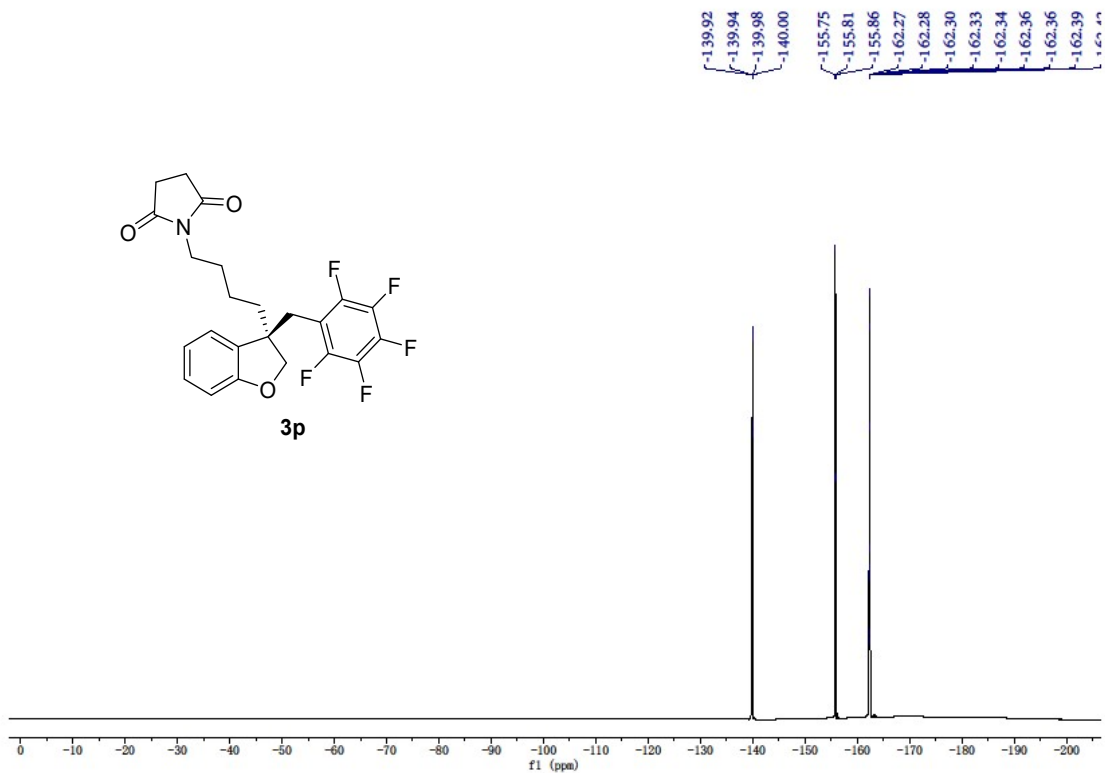

<Chromatogram>

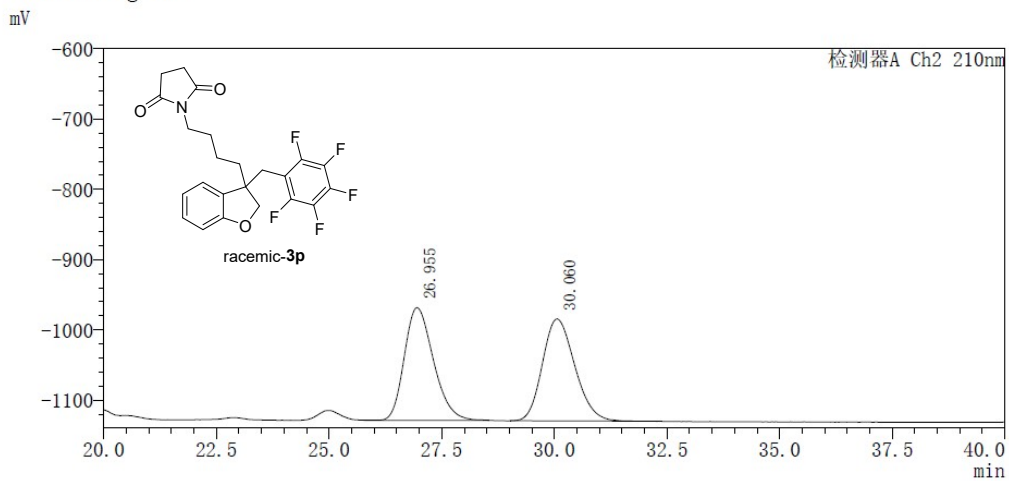

<Peak Table>

检测器A Ch2 210nm

| No.   | Ret. Time (min) | Height | Height% | Area     | Area%   |
|-------|-----------------|--------|---------|----------|---------|
| 1     | 26.955          | 160300 | 52.468  | 7212174  | 49.889  |
| 2     | 30.060          | 145218 | 47.532  | 7244241  | 50.111  |
| Total |                 | 305518 | 100.000 | 14456414 | 100.000 |

<Chromatogram>

mV

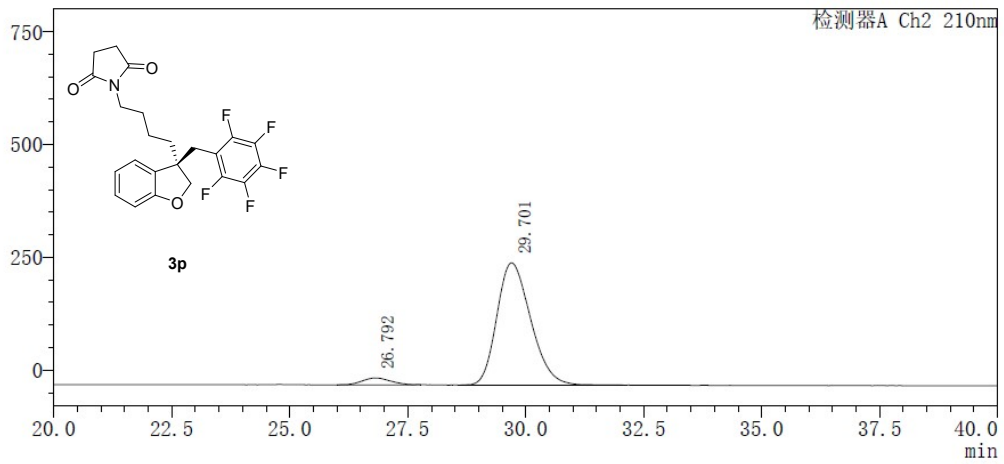

<Peak Table>

检测器A Ch2 210nm

| No.   | Ret. Time (min) | Height | Height% | Area     | Area%   |
|-------|-----------------|--------|---------|----------|---------|
| 1     | 26.792          | 15003  | 5.246   | 639111   | 4.514   |
| 2     | 29.701          | 270962 | 94.754  | 13520168 | 95.486  |
| Total |                 | 285964 | 100.000 | 14159280 | 100.000 |

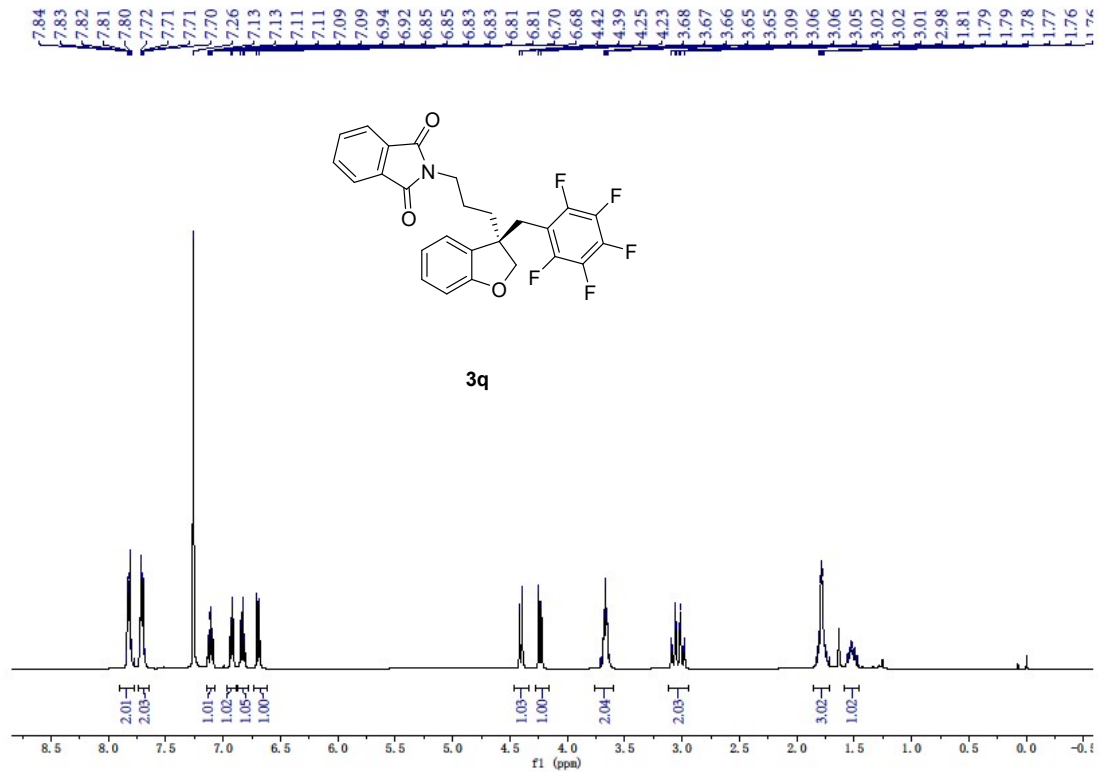

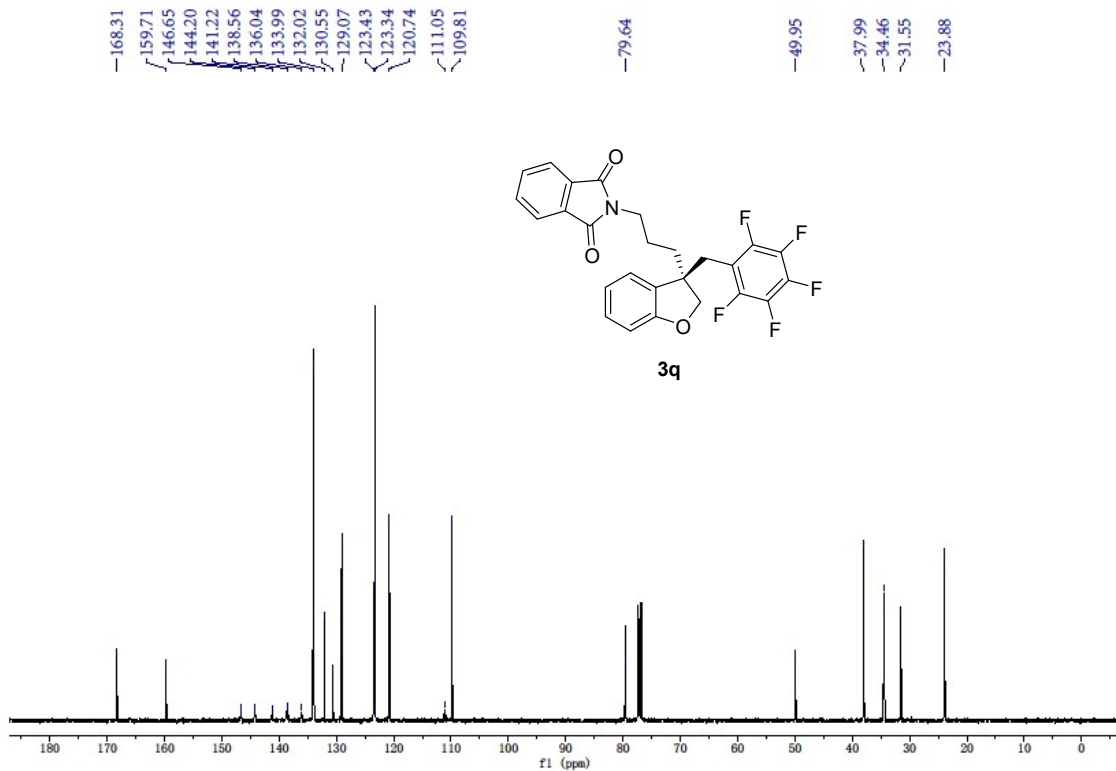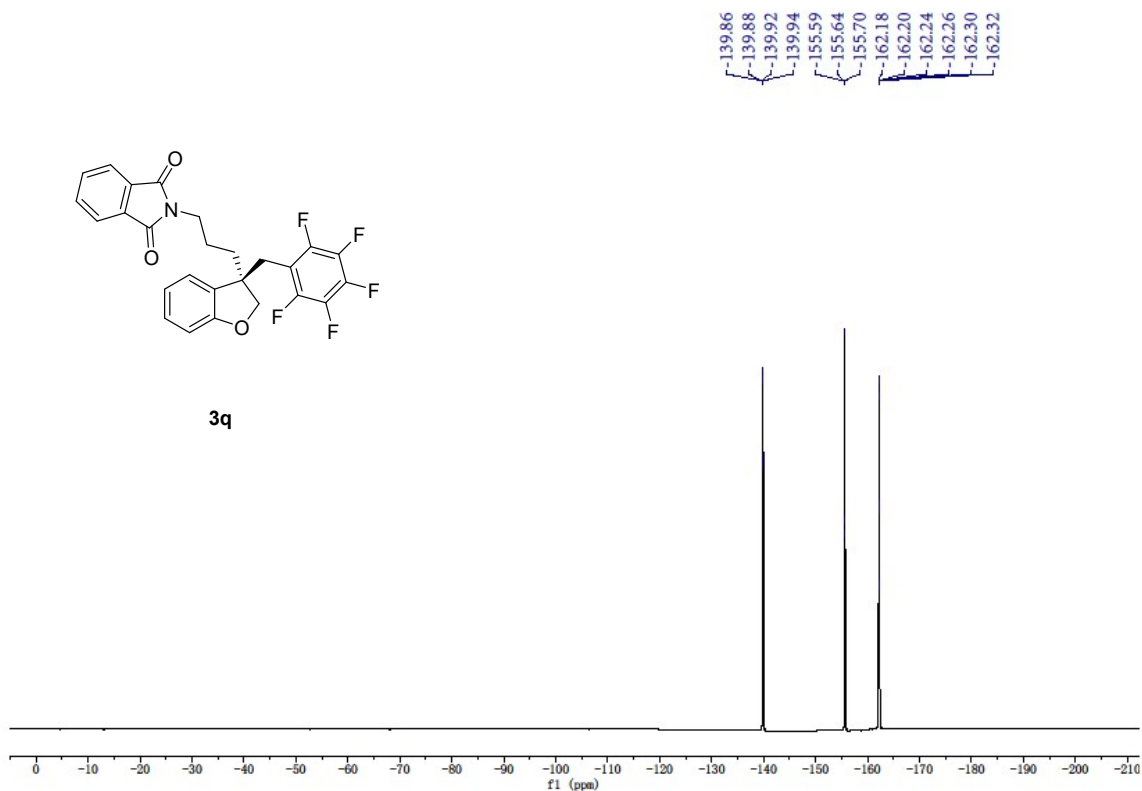

<Chromatogram>

mAU

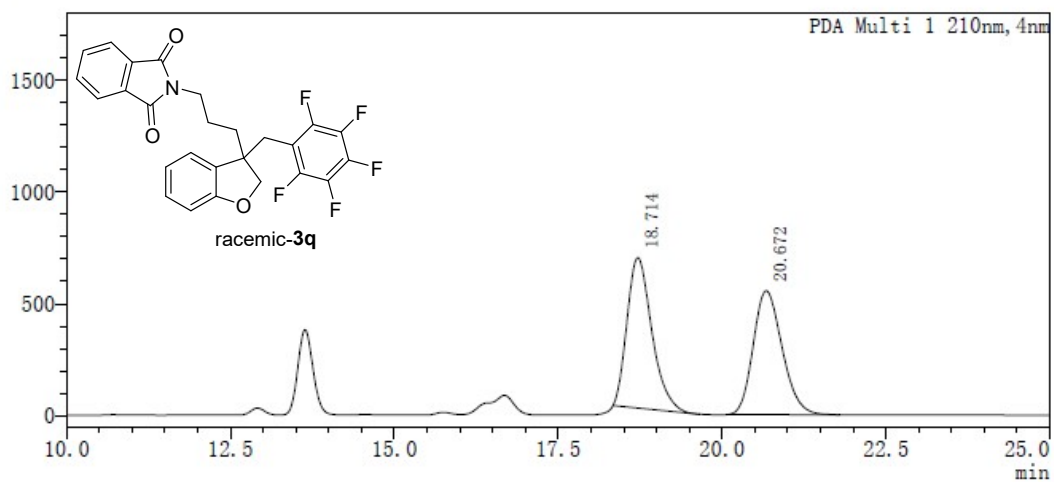

<Peak Table>

PDA Ch1 210nm

| No.   | Ret. Time(min) | Height  | Height% | Area     | Area%   |
|-------|----------------|---------|---------|----------|---------|
| 1     | 18.714         | 672354  | 54.813  | 17713947 | 50.964  |
| 2     | 20.672         | 554279  | 45.187  | 17043750 | 49.036  |
| Total |                | 1226633 | 100.000 | 34757696 | 100.000 |

<Chromatogram>

mAU

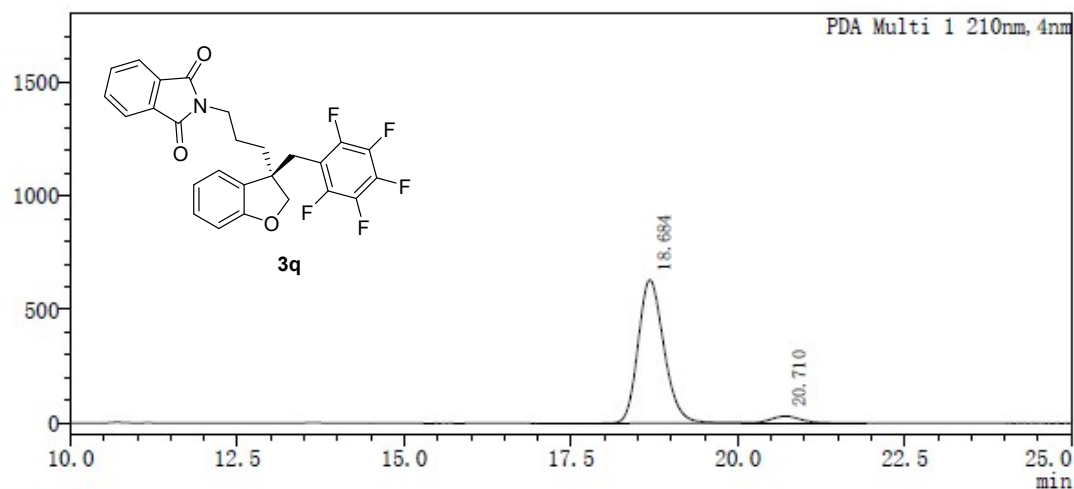

<Peak Table>

PDA Ch1 210nm

| No.   | Ret. Time(min) | Height | Height% | Area     | Area%   |
|-------|----------------|--------|---------|----------|---------|
| 1     | 18.684         | 629709 | 95.318  | 17061797 | 94.493  |
| 2     | 20.710         | 30929  | 4.682   | 993337   | 5.502   |
| Total |                | 660638 | 100.000 | 18055135 | 100.000 |

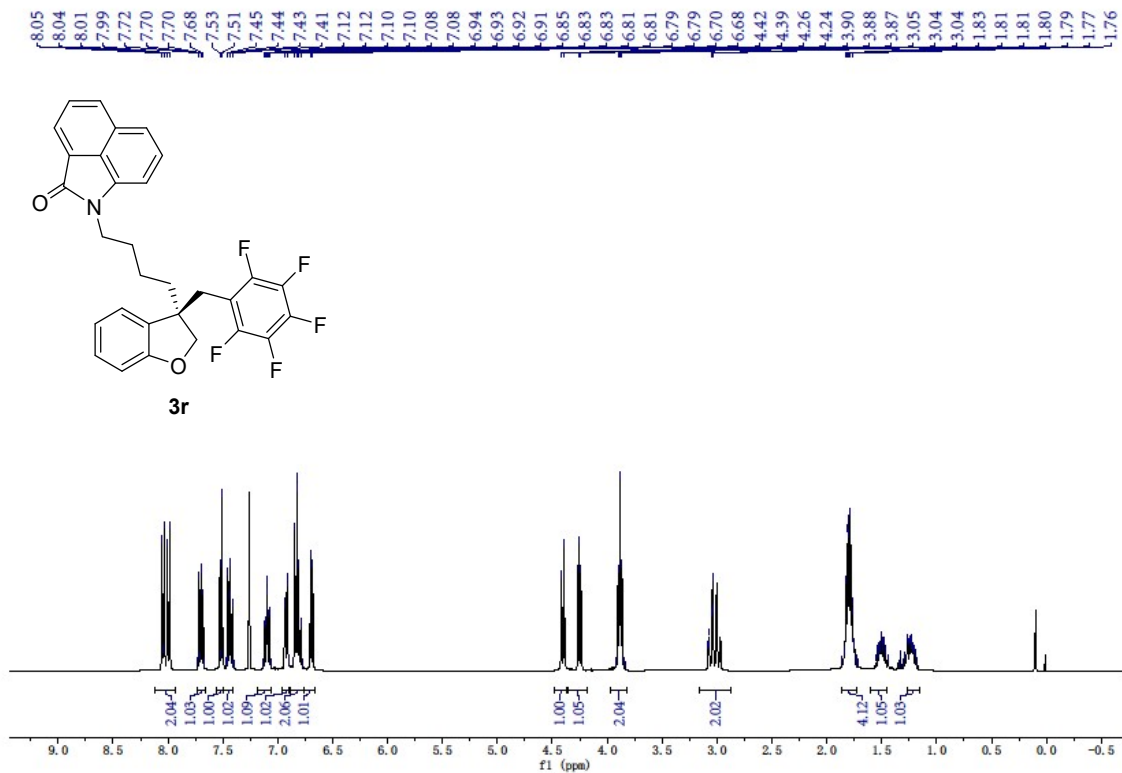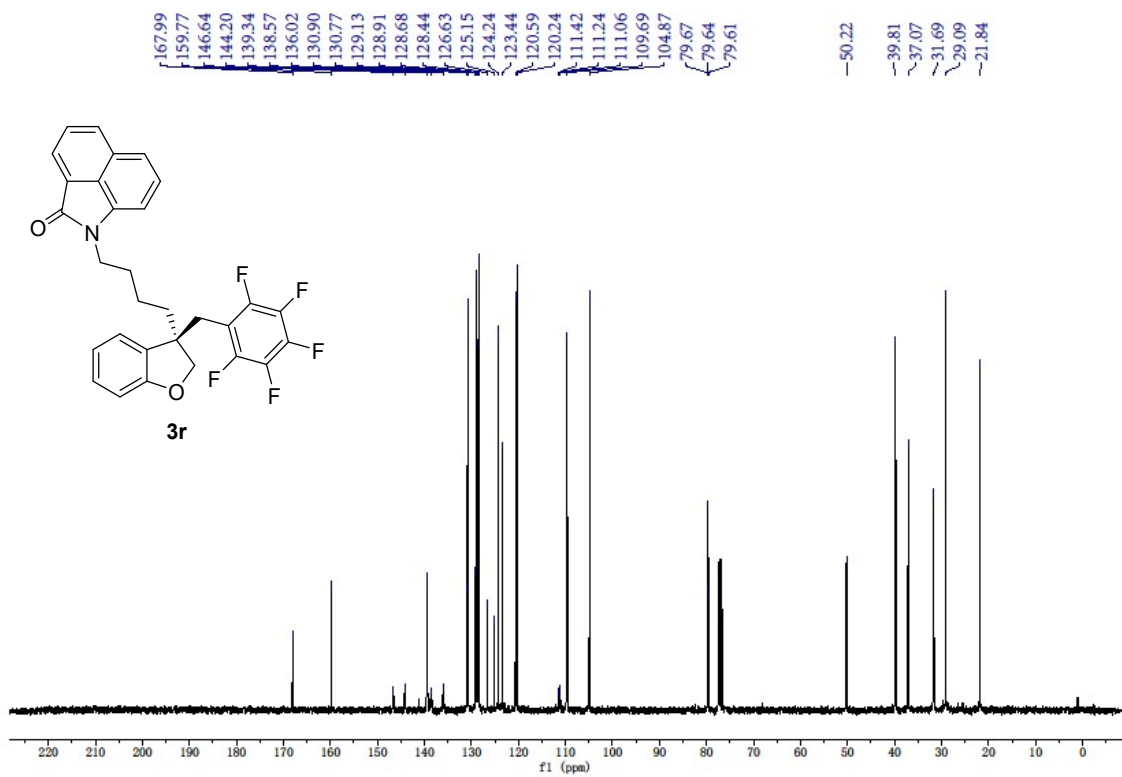



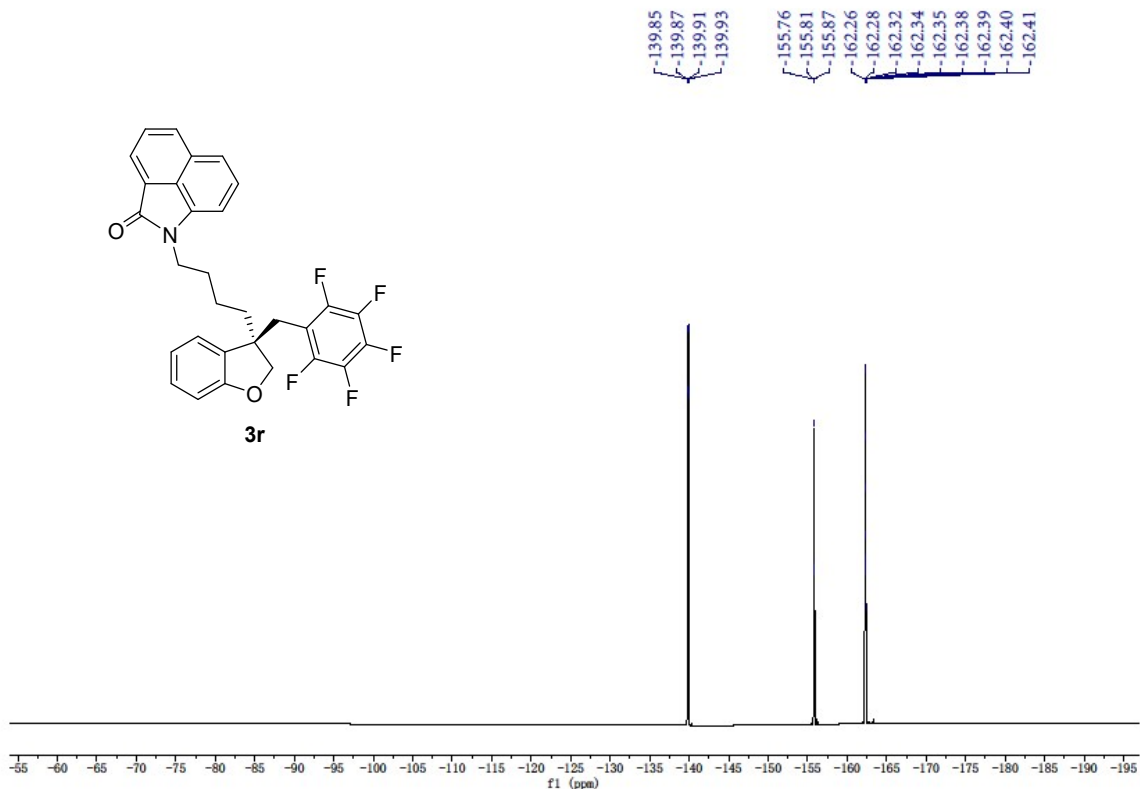

<Chromatogram>

mV

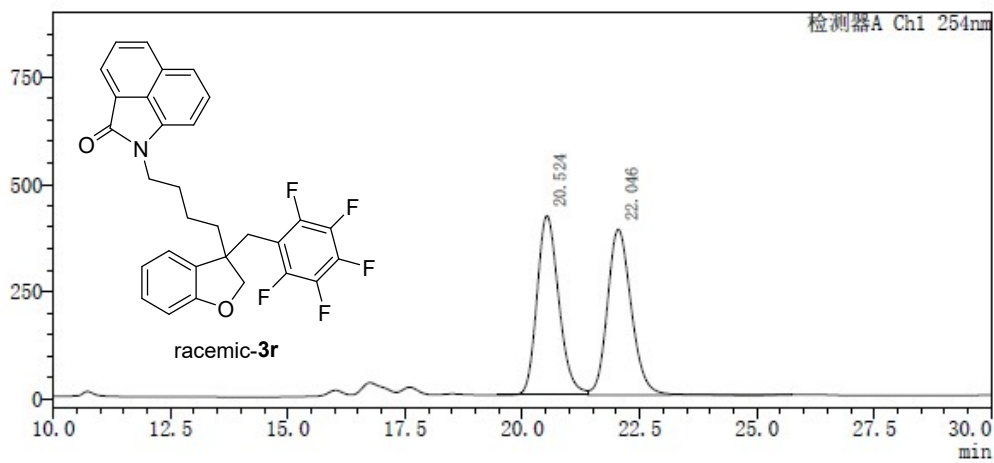

<Peak Table>

检测器A Ch1 254nm

| No.   | Ret. Time (min) | Height | Height% | Area     | Area%   |
|-------|-----------------|--------|---------|----------|---------|
| 1     | 20.524          | 417622 | 51.986  | 13518143 | 50.085  |
| 2     | 22.046          | 385717 | 48.014  | 13472005 | 49.915  |
| Total |                 | 803340 | 100.000 | 26990148 | 100.000 |

<Chromatogram>

mV

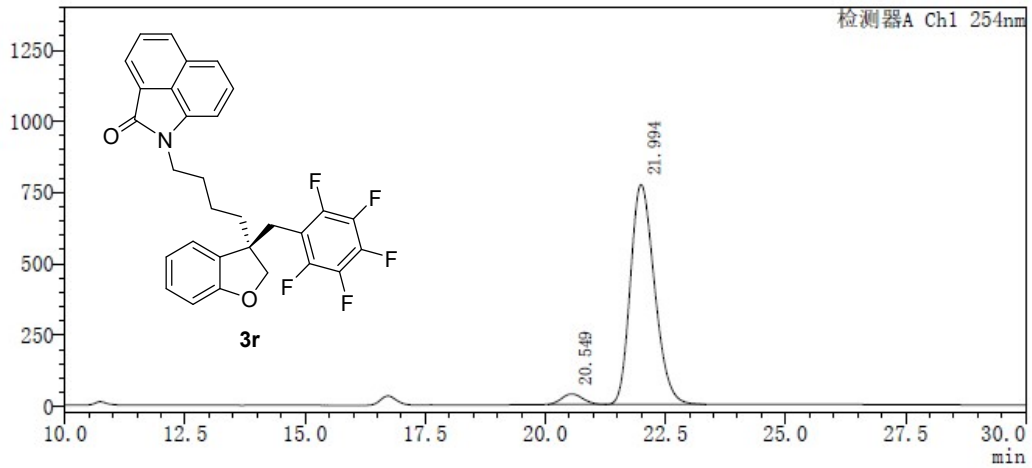

<Peak Table>

检测器A Ch1 254nm

| No.   | Ret. Time (min) | Height | Height% | Area     | Area%   |
|-------|-----------------|--------|---------|----------|---------|
| 1     | 20.549          | 36612  | 4.532   | 1100871  | 3.932   |
| 2     | 21.994          | 771238 | 95.468  | 26893828 | 96.068  |
| Total |                 | 807849 | 100.000 | 27994700 | 100.000 |

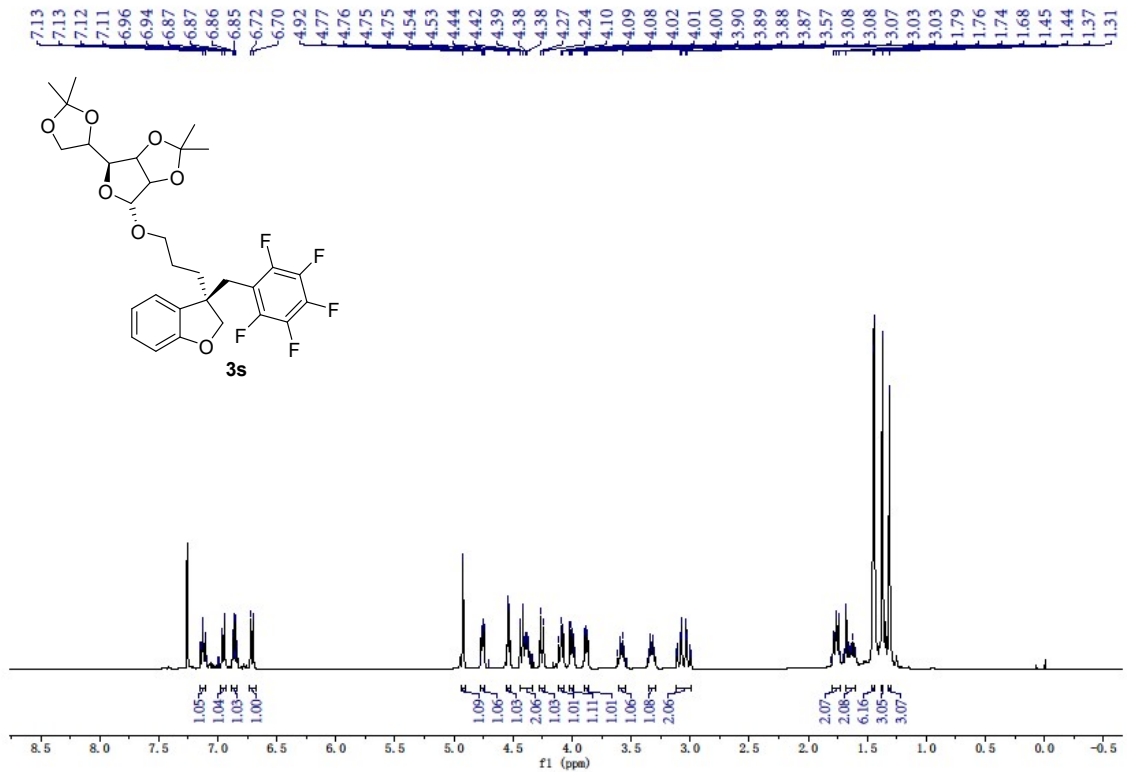

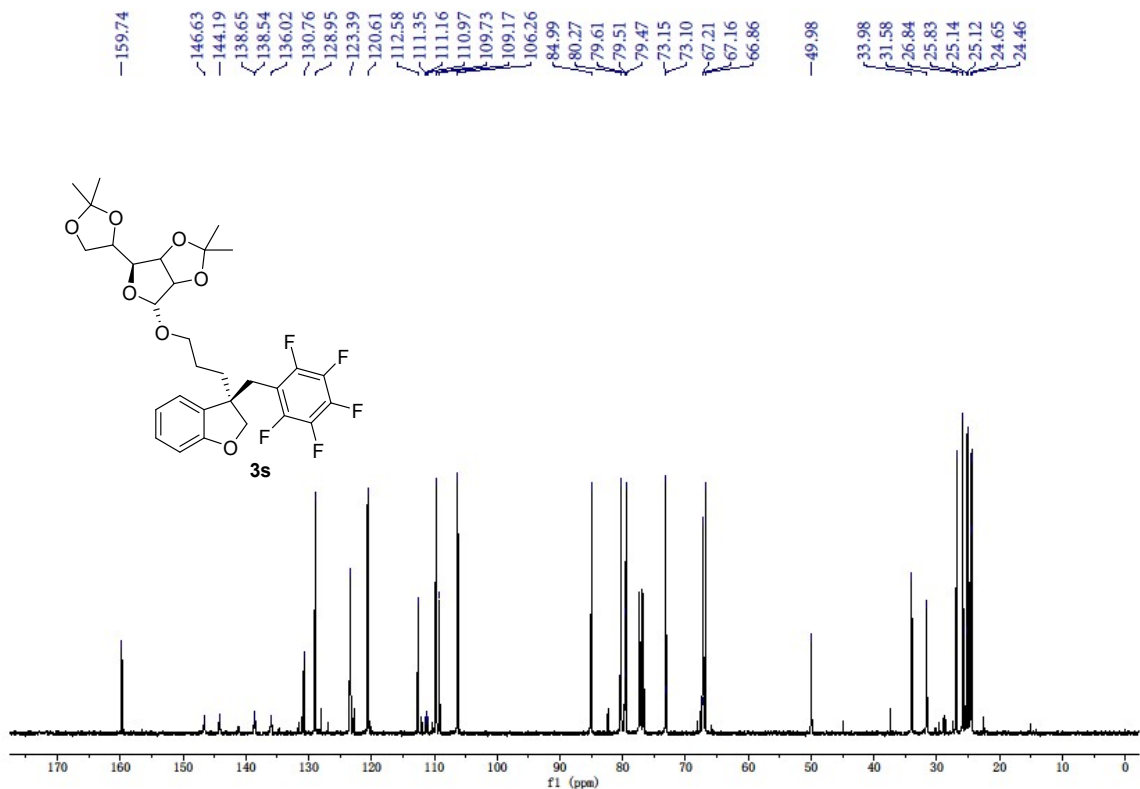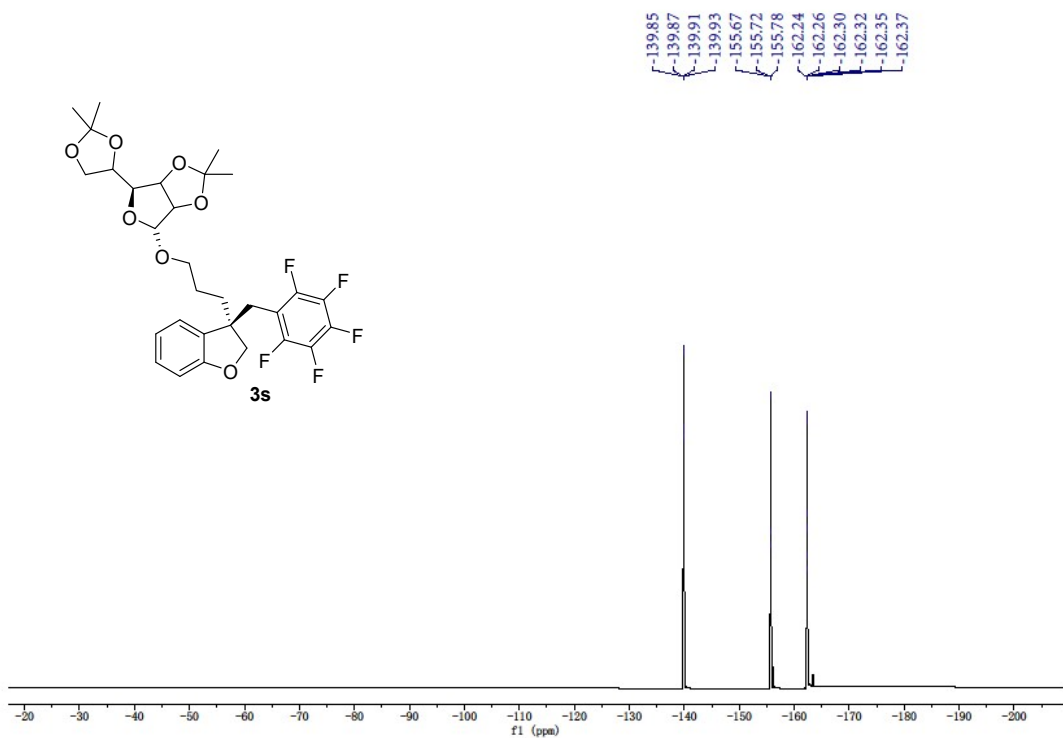

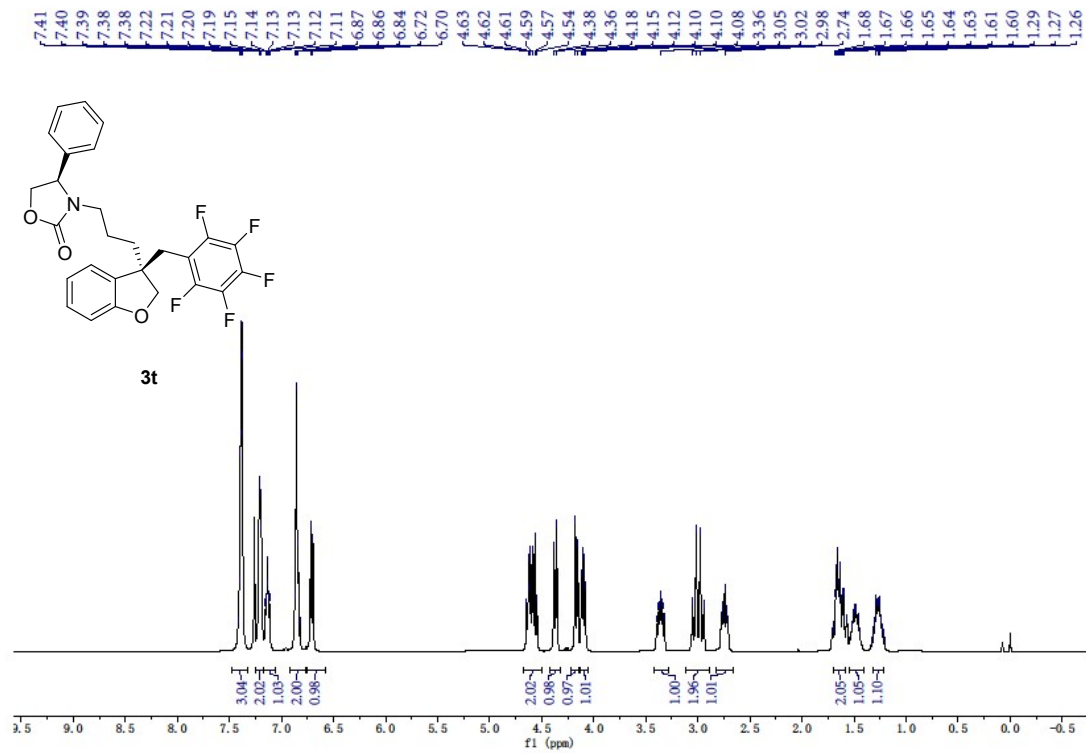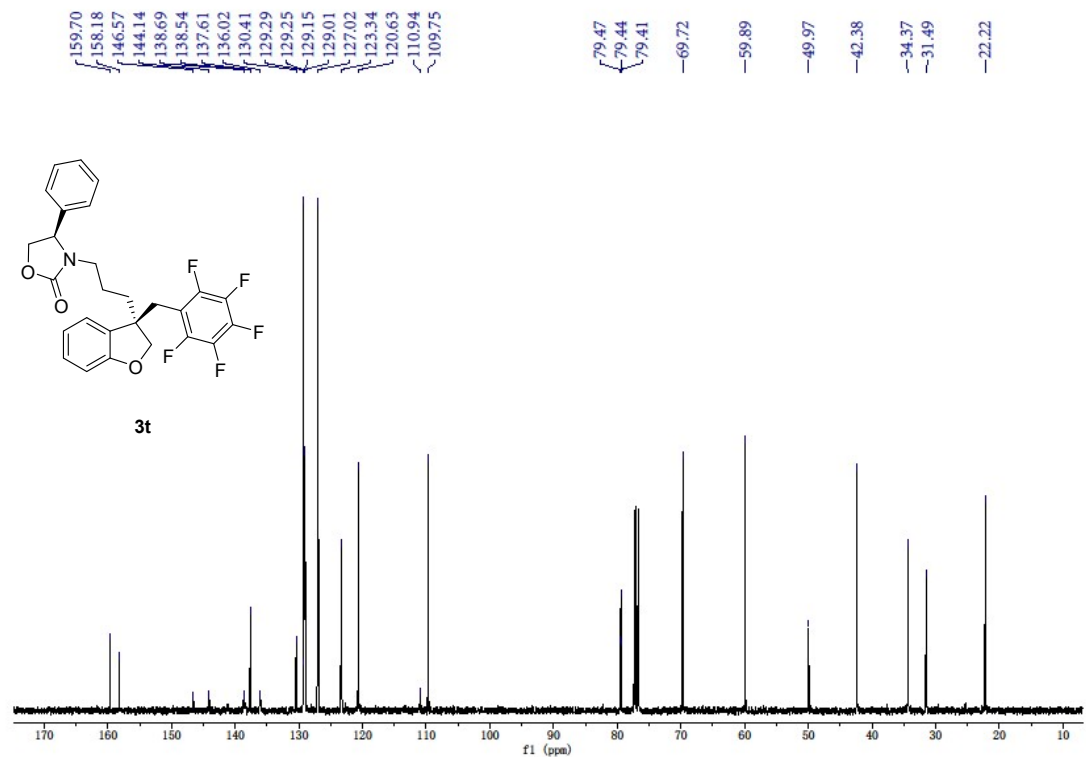

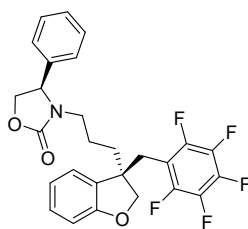

3t

139.84  
139.86  
139.90  
139.92  
155.44  
155.49  
155.55  
155.59  
162.03  
162.06  
162.09  
162.11  
162.15  
162.17

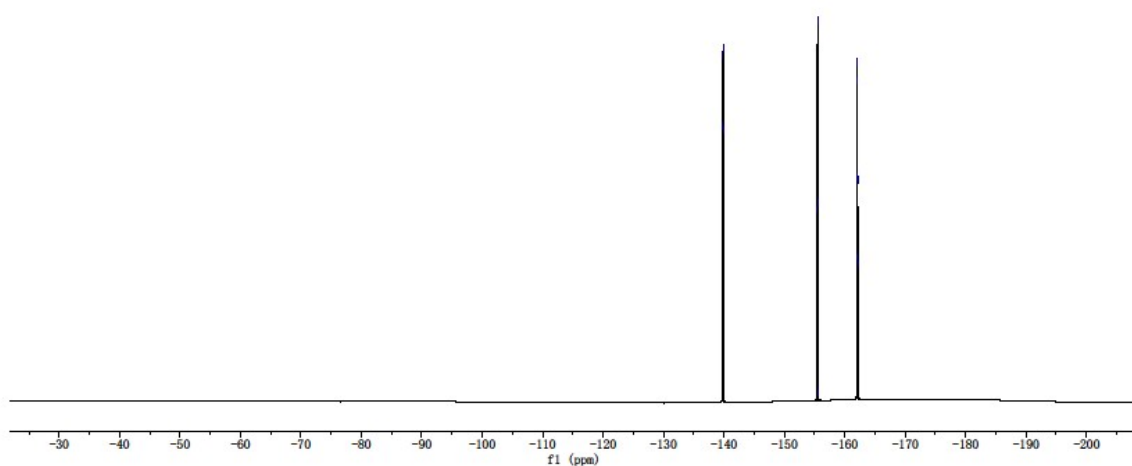

7.05  
6.91  
6.79  
6.77  
4.50  
4.40  
3.62  
3.61  
2.59  
2.15  
2.10  
2.04  
2.04  
1.59  
1.59  
1.58  
1.57  
1.57  
1.56  
1.54  
1.54  
1.43  
1.42  
1.42  
1.40  
1.35  
1.35  
1.33  
1.32  
1.32  
1.30  
1.29  
1.28  
1.20  
1.18  
1.18  
1.17  
1.16  
1.16  
1.11  
1.11  
1.10  
1.09  
1.08  
0.91  
0.89  
0.88  
0.88  
0.87

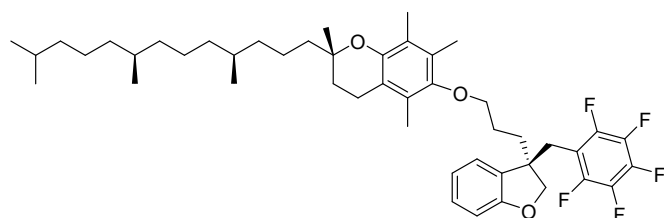

3u

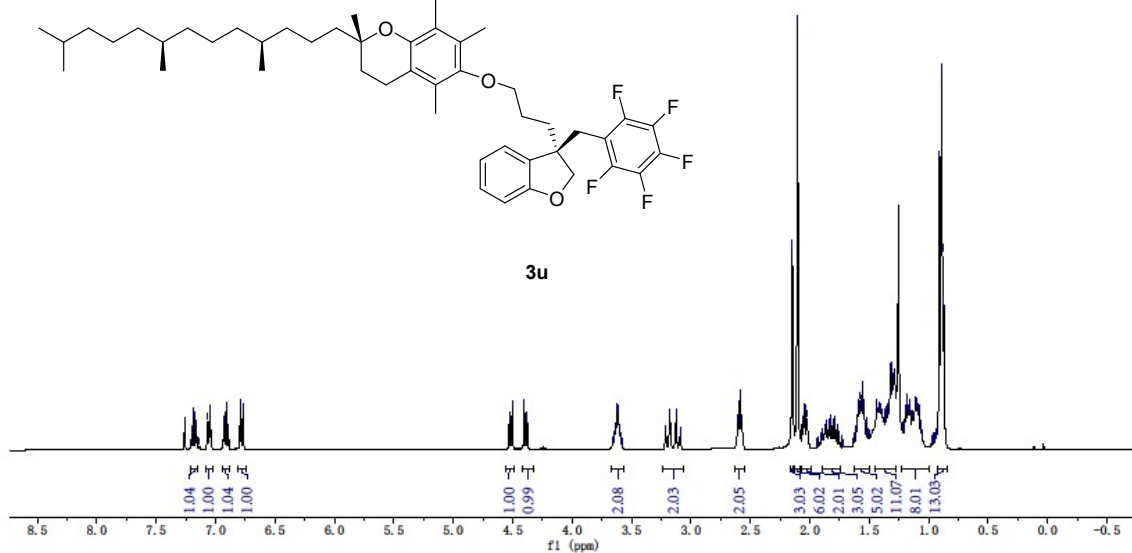

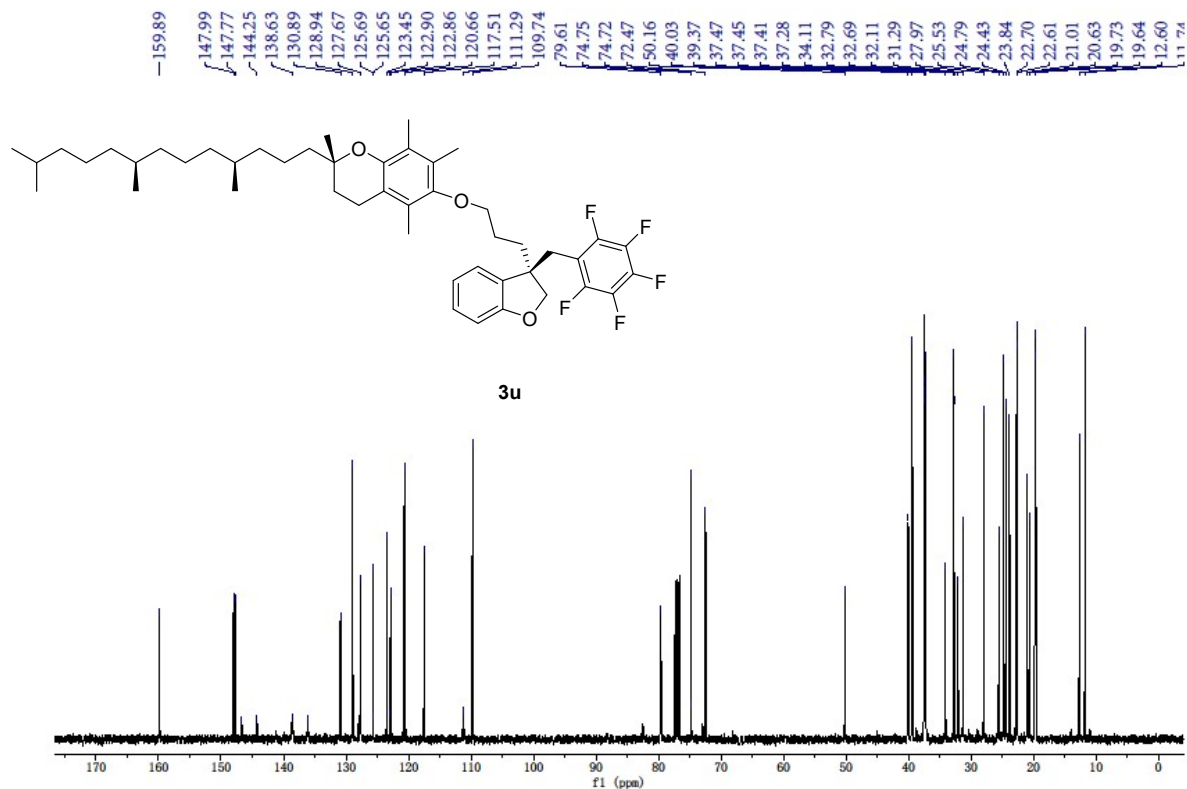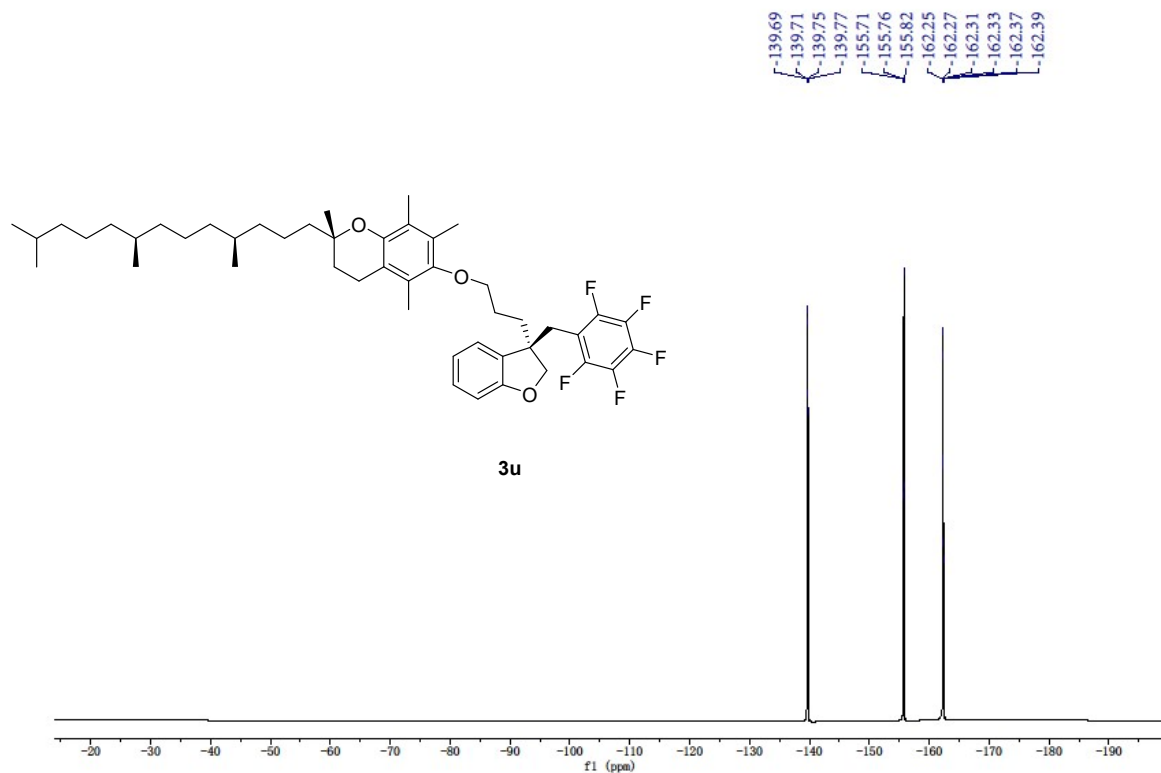

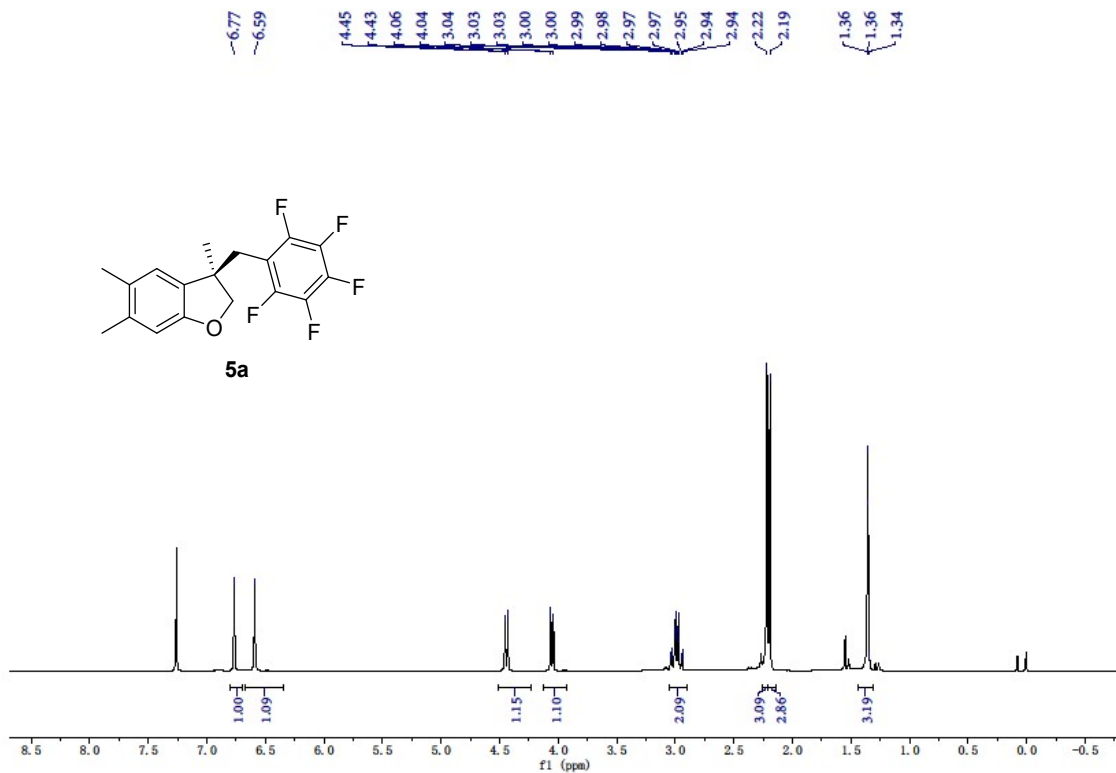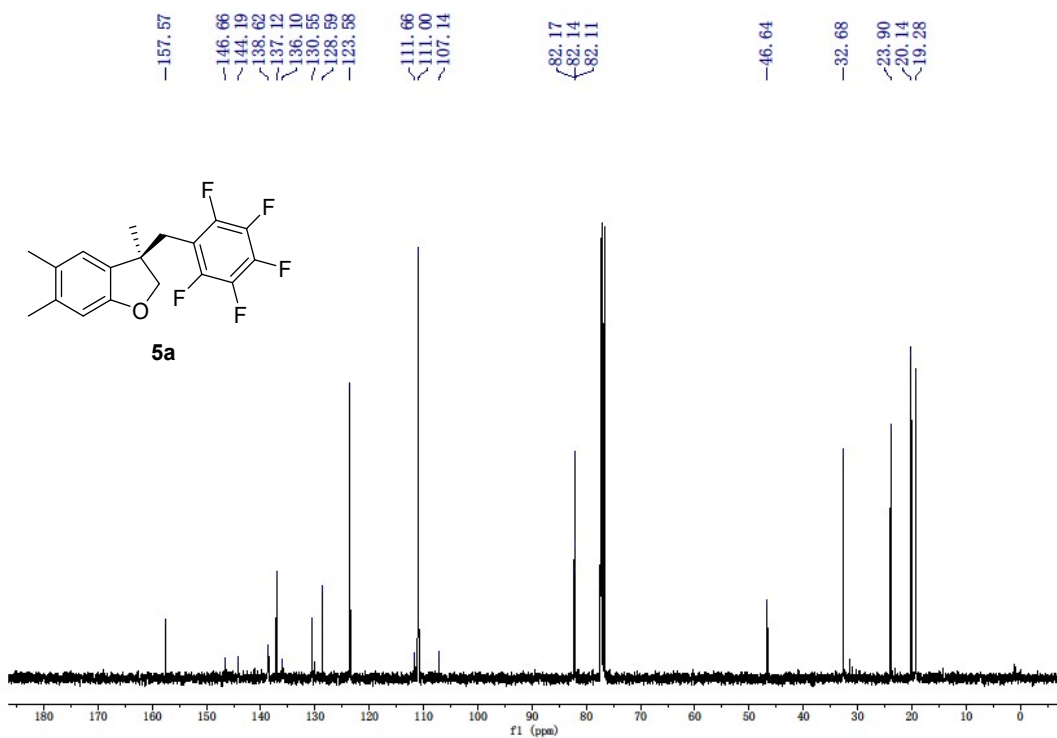

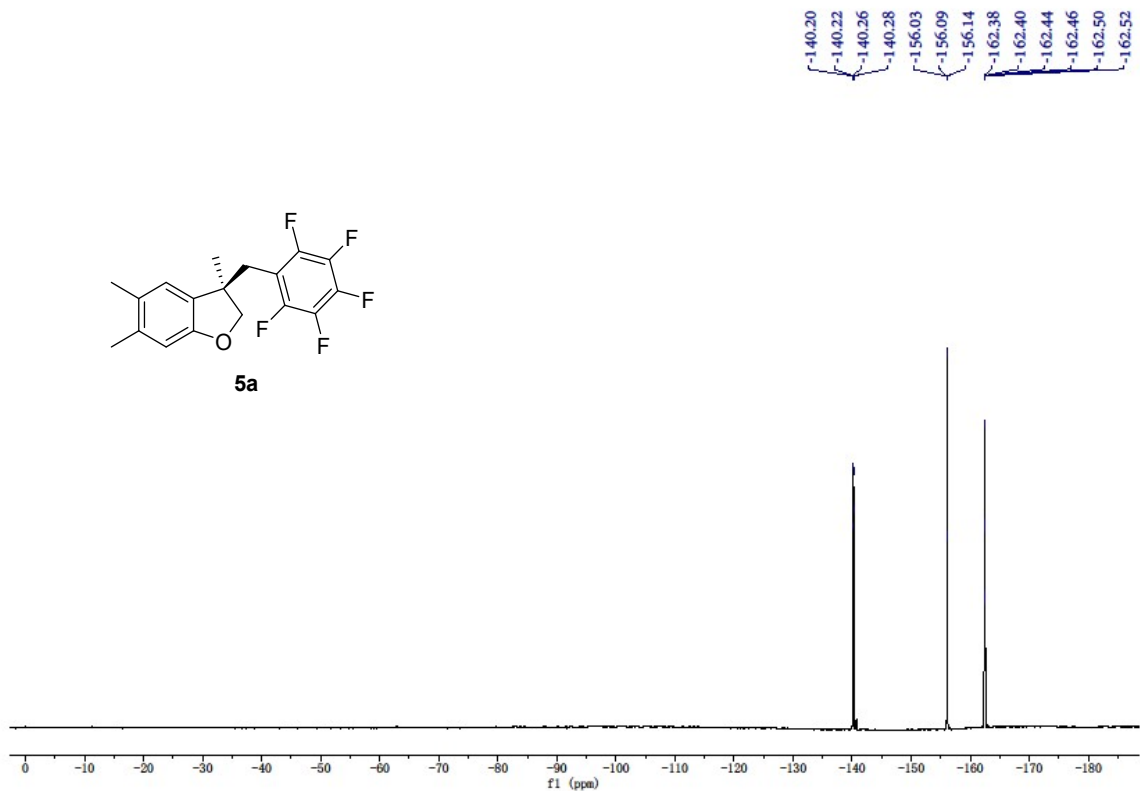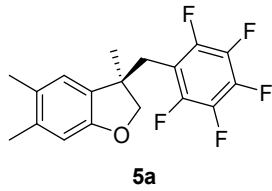

<Chromatogram>  
mV

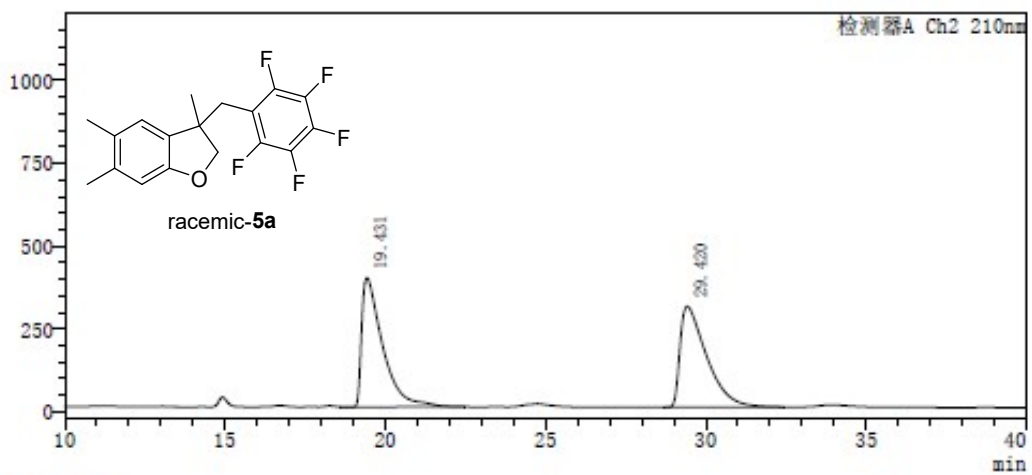

<Peak Table>

检测器A Ch2 210nm

| No.   | Ret. Time (min) | Height | Height% | Area     | Area%   |
|-------|-----------------|--------|---------|----------|---------|
| 1     | 19.431          | 389567 | 56.127  | 17686414 | 50.203  |
| 2     | 29.420          | 304512 | 43.873  | 17543719 | 49.797  |
| Total |                 | 694079 | 100.000 | 35230133 | 100.000 |



<Chromatogram>

mV

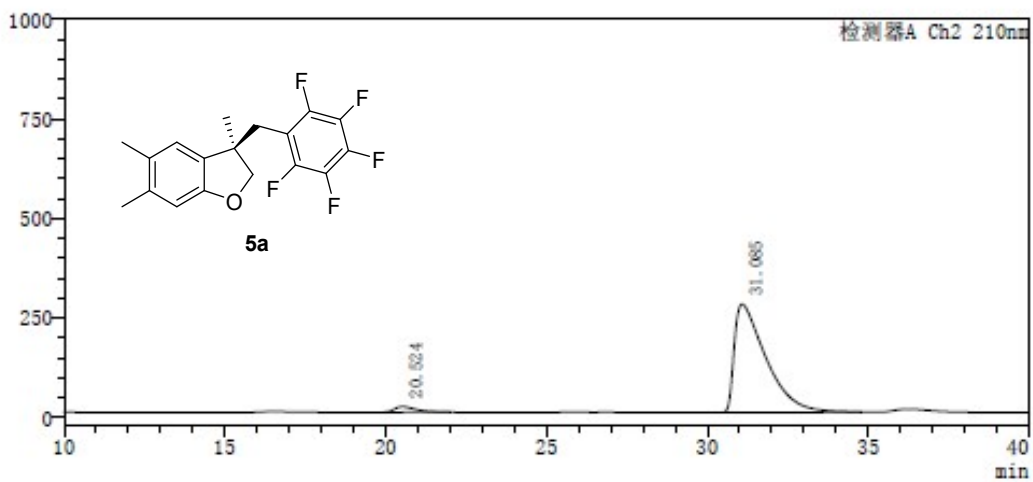

<Peak Table>

检测器A Ch2 210nm

| No.   | Ret. Time (min) | Height | Height% | Area     | Area%   |
|-------|-----------------|--------|---------|----------|---------|
| 1     | 20.524          | 13992  | 4.894   | 646014   | 3.351   |
| 2     | 31.085          | 271913 | 95.106  | 18629591 | 96.649  |
| Total |                 | 285905 | 100.000 | 19275605 | 100.000 |

6.86 6.85 6.83 6.83 6.81 6.81 6.72 6.72 6.70 6.69 6.67 6.66 6.65 4.51 4.49 4.14 4.12 3.05 3.05 3.04 3.02 3.01 3.01 2.99 2.99 2.98 2.96 2.95 2.95 1.40 1.40 1.40

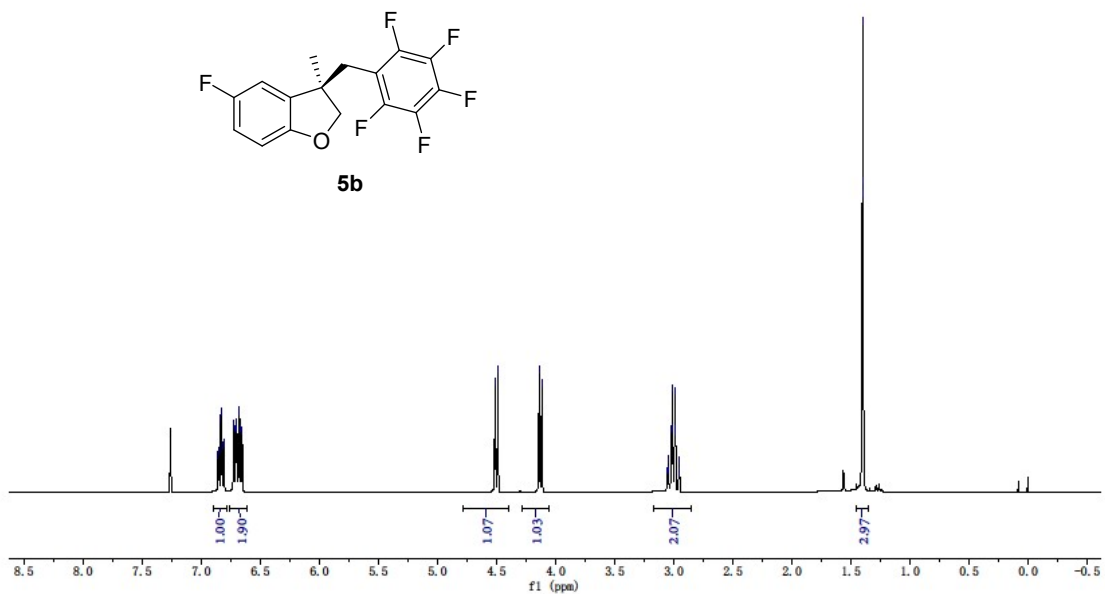

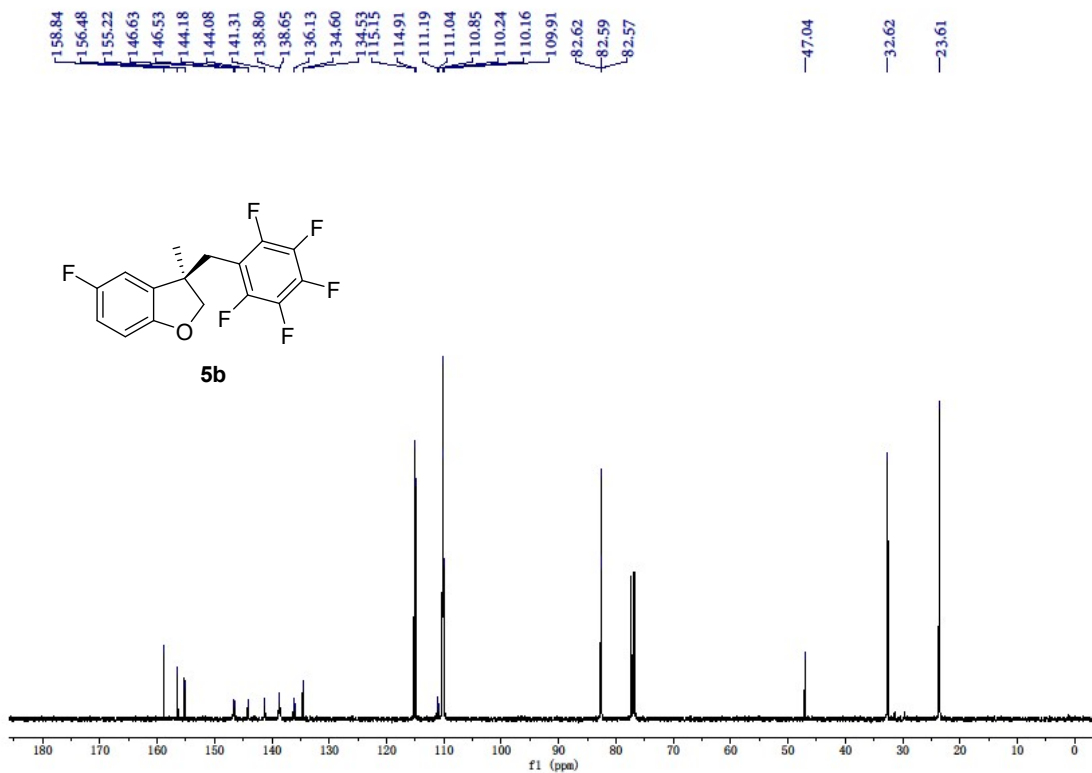

<Chromatogram>

mV

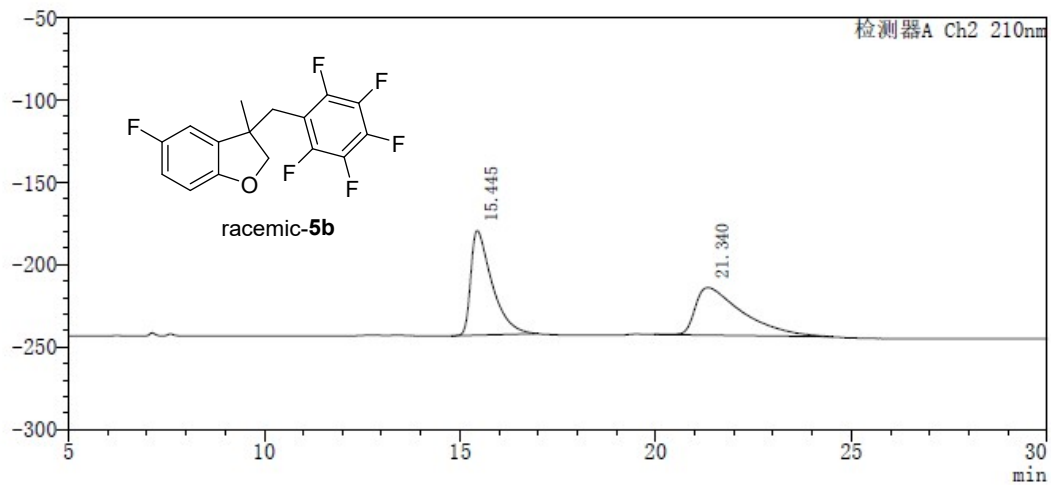

<Peak Table>

检测器A Ch2 210nm

| No.   | Ret. Time (min) | Height | Height% | Area    | Area%   |
|-------|-----------------|--------|---------|---------|---------|
| 1     | 15.445          | 63481  | 68.730  | 2401003 | 49.796  |
| 2     | 21.340          | 28882  | 31.270  | 2420682 | 50.204  |
| Total |                 | 92364  | 100.000 | 4821685 | 100.000 |

<Chromatogram>

mV

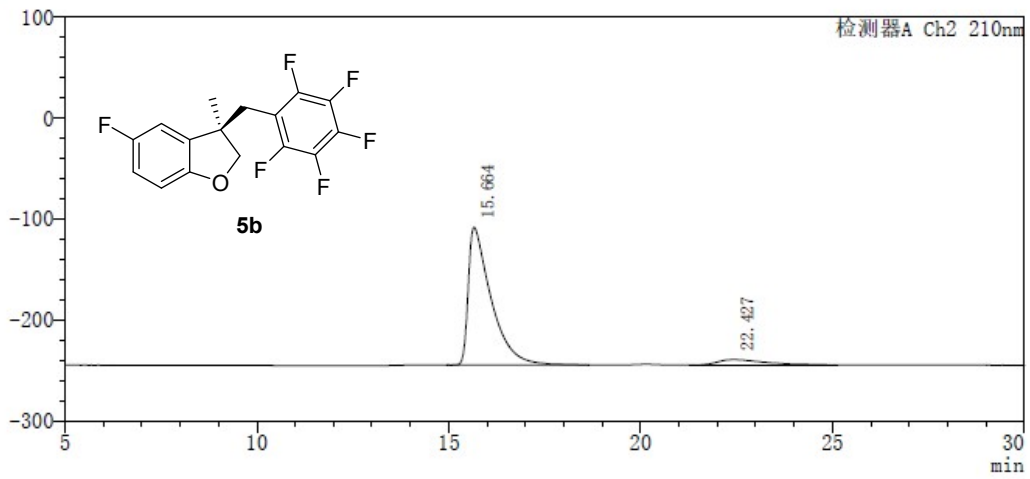

<Peak Table>

检测器A Ch2 210nm

| No.   | Ret. Time (min) | Height | Height% | Area    | Area%   |
|-------|-----------------|--------|---------|---------|---------|
| 1     | 15.664          | 136322 | 96.292  | 5630016 | 93.023  |
| 2     | 22.427          | 5250   | 3.708   | 422287  | 6.977   |
| Total |                 | 141572 | 100.000 | 6052304 | 100.000 |

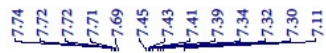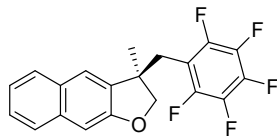

5c

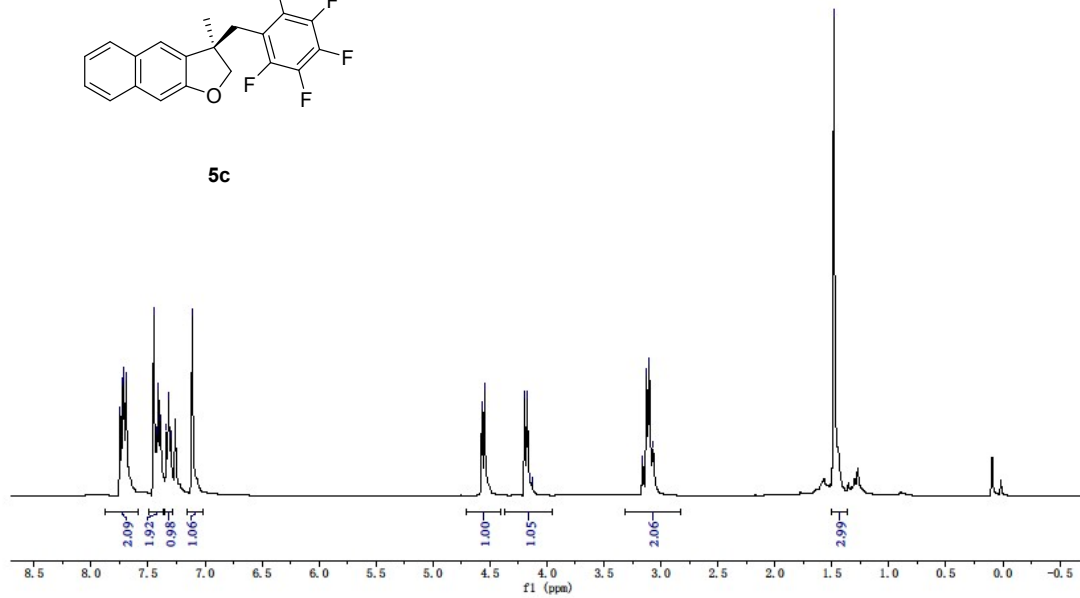

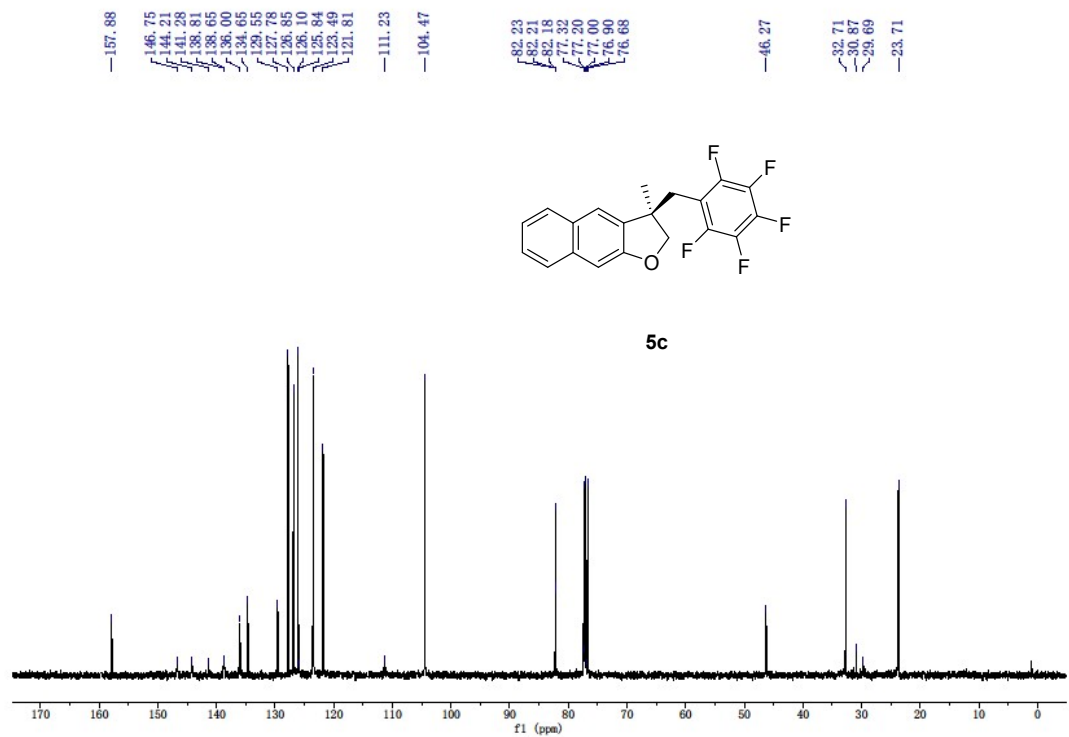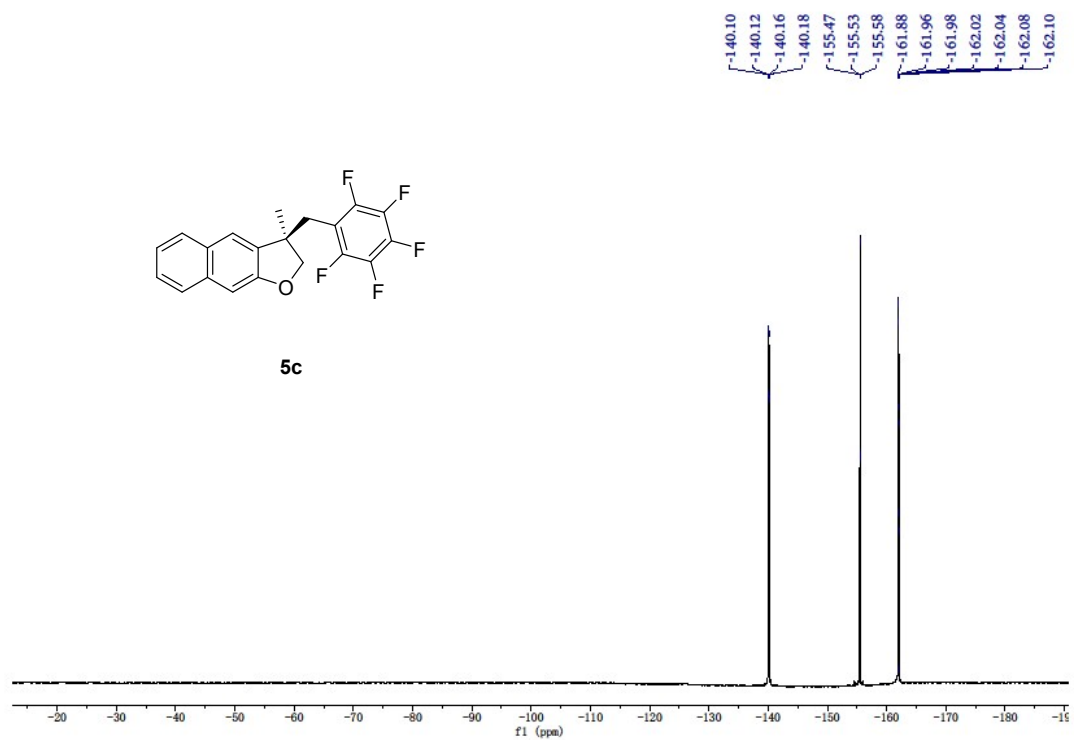

<Chromatogram>

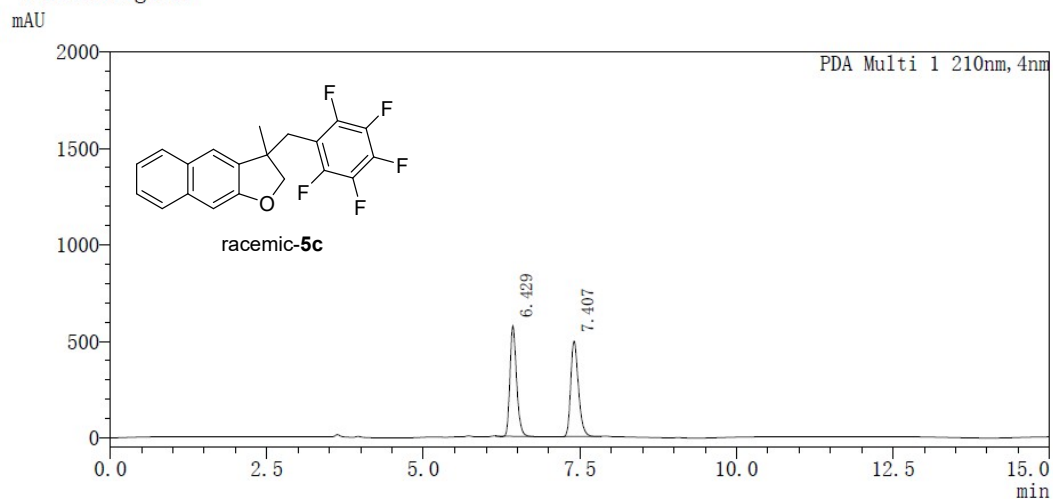

<Peak Table>

PDA Ch1 210nm

| No.   | Ret. Time (min) | Height  | Height% | Area    | Area%   |
|-------|-----------------|---------|---------|---------|---------|
| 1     | 6.429           | 571480  | 53.576  | 4192264 | 49.723  |
| 2     | 7.407           | 495187  | 46.424  | 4239026 | 50.277  |
| Total |                 | 1066667 | 100.000 | 8431290 | 100.000 |

<Chromatogram>

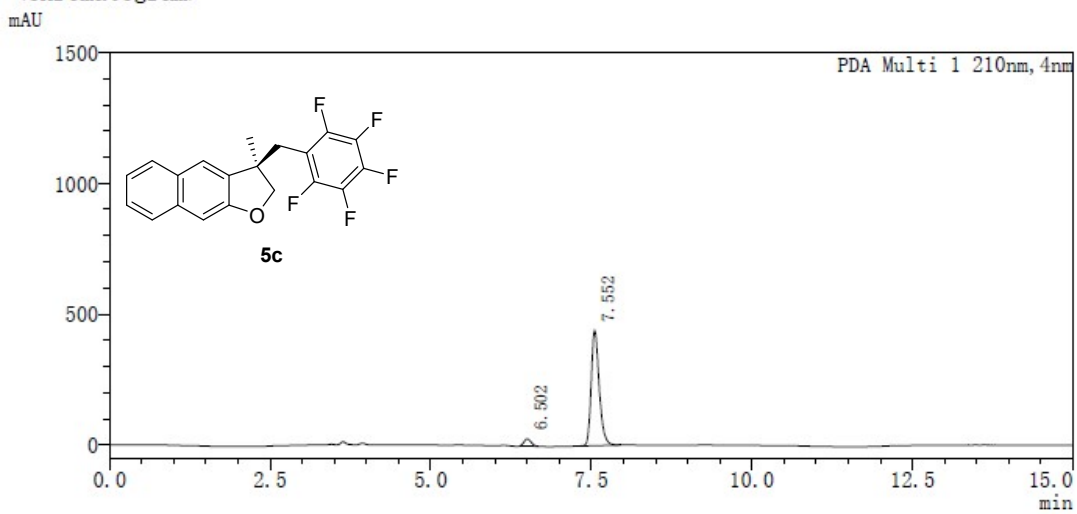

<Peak Table>

PDA Ch1 210nm

| No.   | Ret. Time (min) | Height | Height% | Area    | Area%   |
|-------|-----------------|--------|---------|---------|---------|
| 1     | 6.502           | 27399  | 5.860   | 205035  | 5.093   |
| 2     | 7.552           | 440197 | 94.140  | 3820646 | 94.907  |
| Total |                 | 467596 | 100.000 | 4025681 | 100.000 |

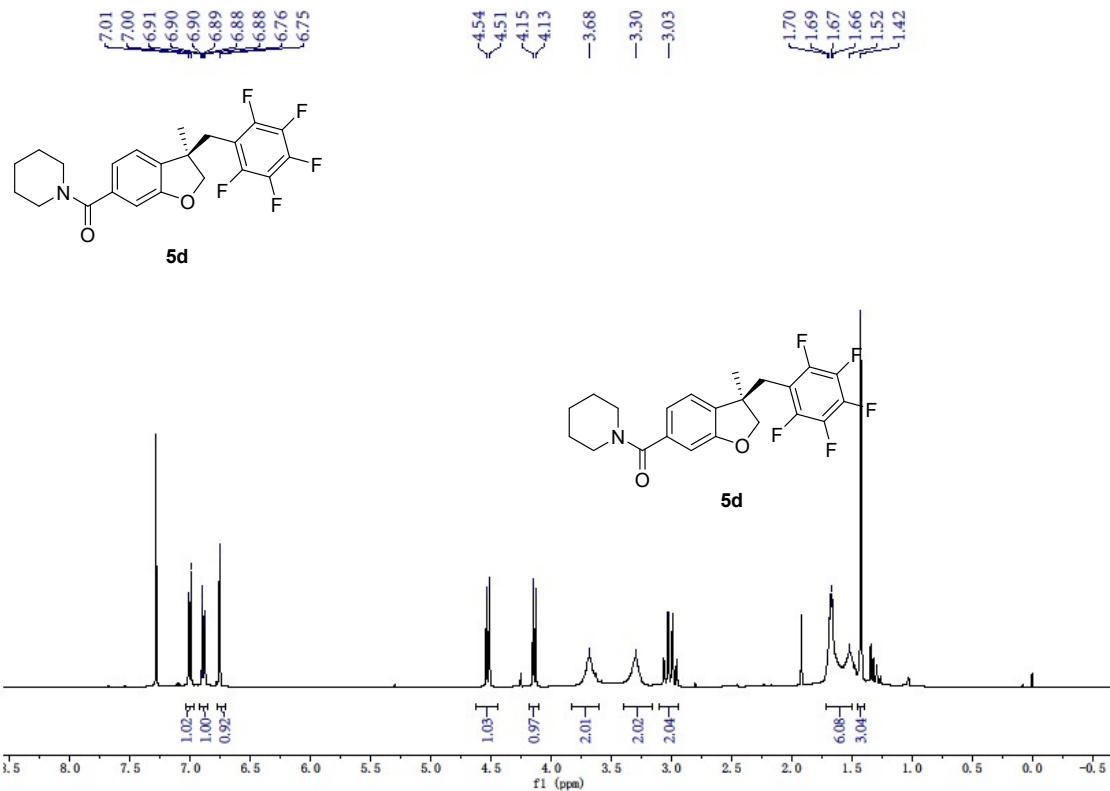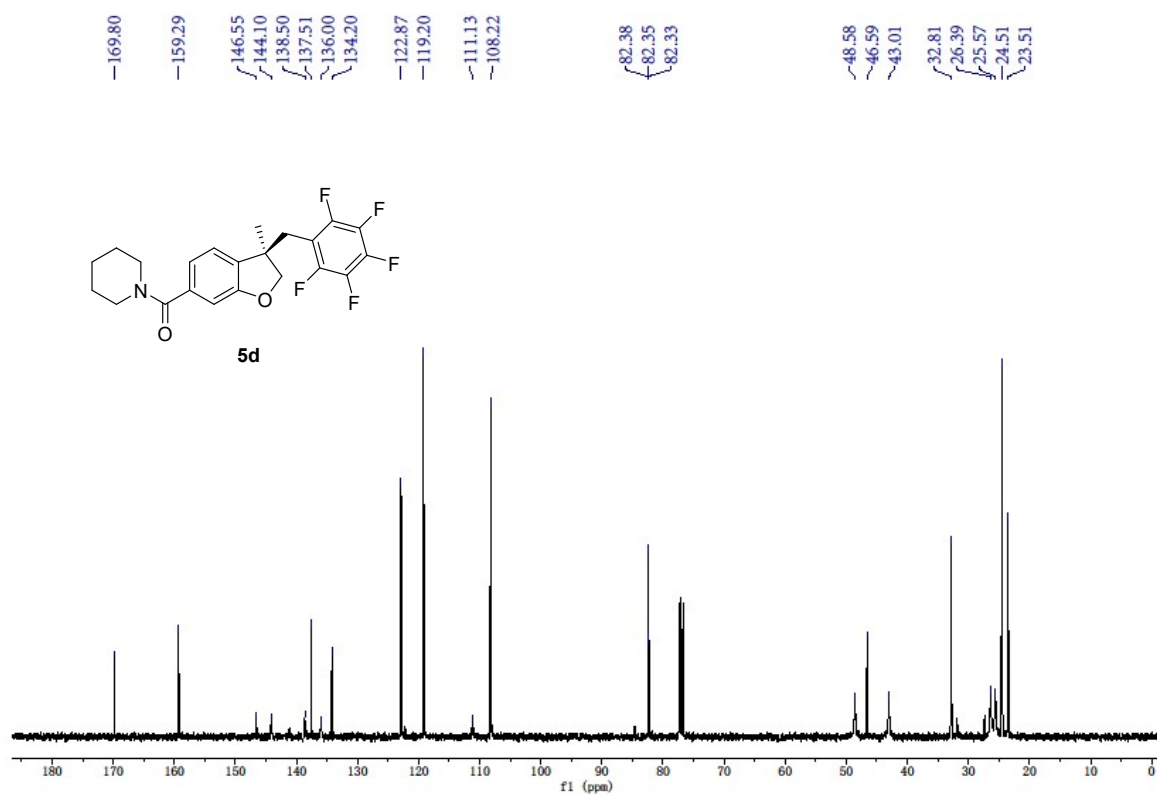

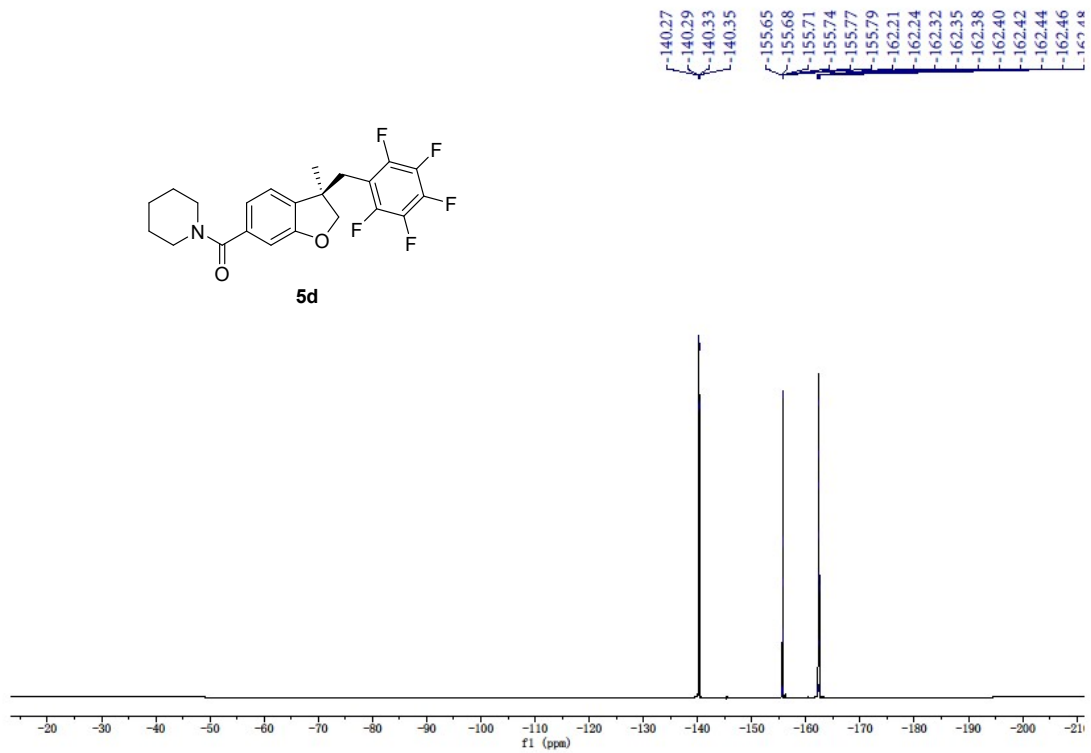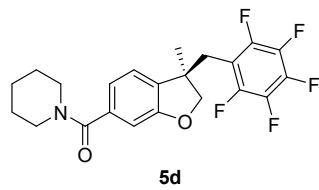

<Chromatogram>

mAU

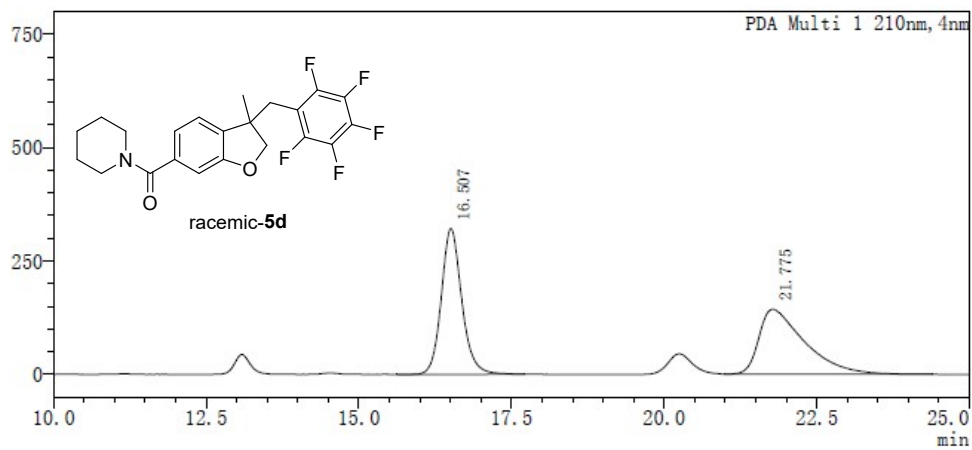

<Peak Table>

PDA Ch1 210nm

| No.   | Ret. Time (min) | Height | Height% | Area     | Area%   |
|-------|-----------------|--------|---------|----------|---------|
| 1     | 16.507          | 321378 | 69.219  | 7510249  | 50.314  |
| 2     | 21.775          | 142917 | 30.781  | 7416518  | 49.686  |
| Total |                 | 464295 | 100.000 | 14926766 | 100.000 |

<Chromatogram>

mAU

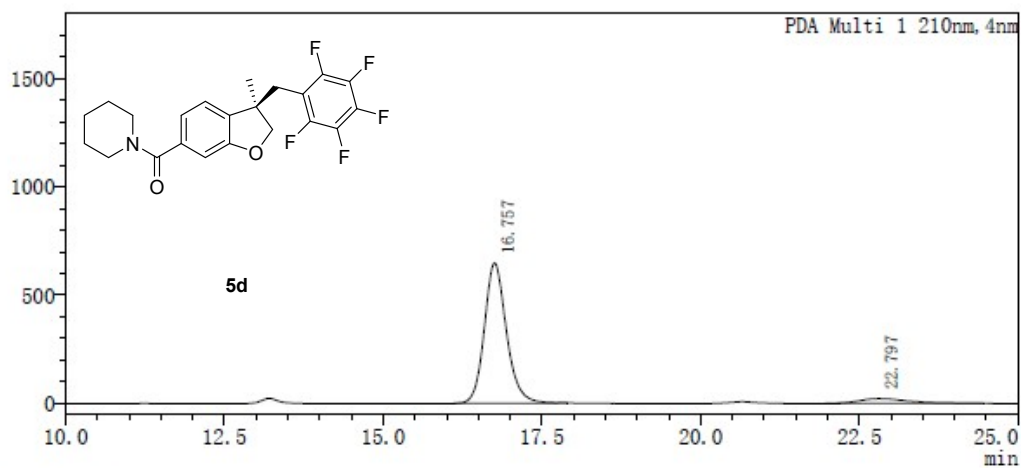

<Peak Table>

PDA Ch1 210nm

| No.   | Ret. Time (min) | Height | Height% | Area     | Area%   |
|-------|-----------------|--------|---------|----------|---------|
| 1     | 16.757          | 648003 | 96.695  | 15730956 | 92.989  |
| 2     | 22.797          | 22146  | 3.305   | 1186085  | 7.011   |
| Total |                 | 670149 | 100.000 | 16917041 | 100.000 |

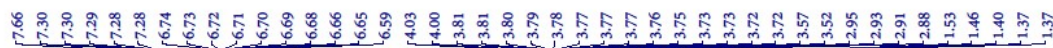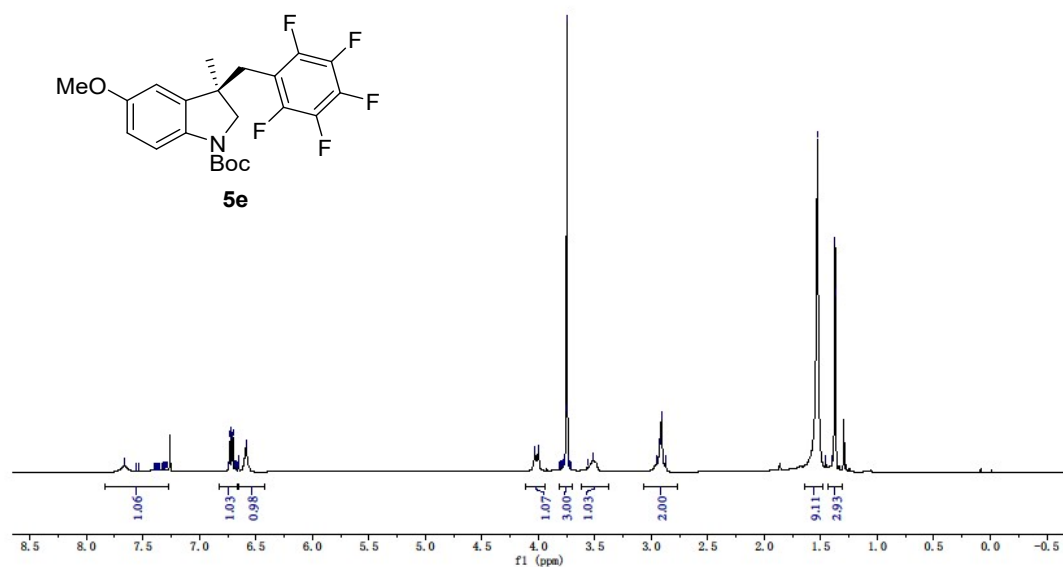



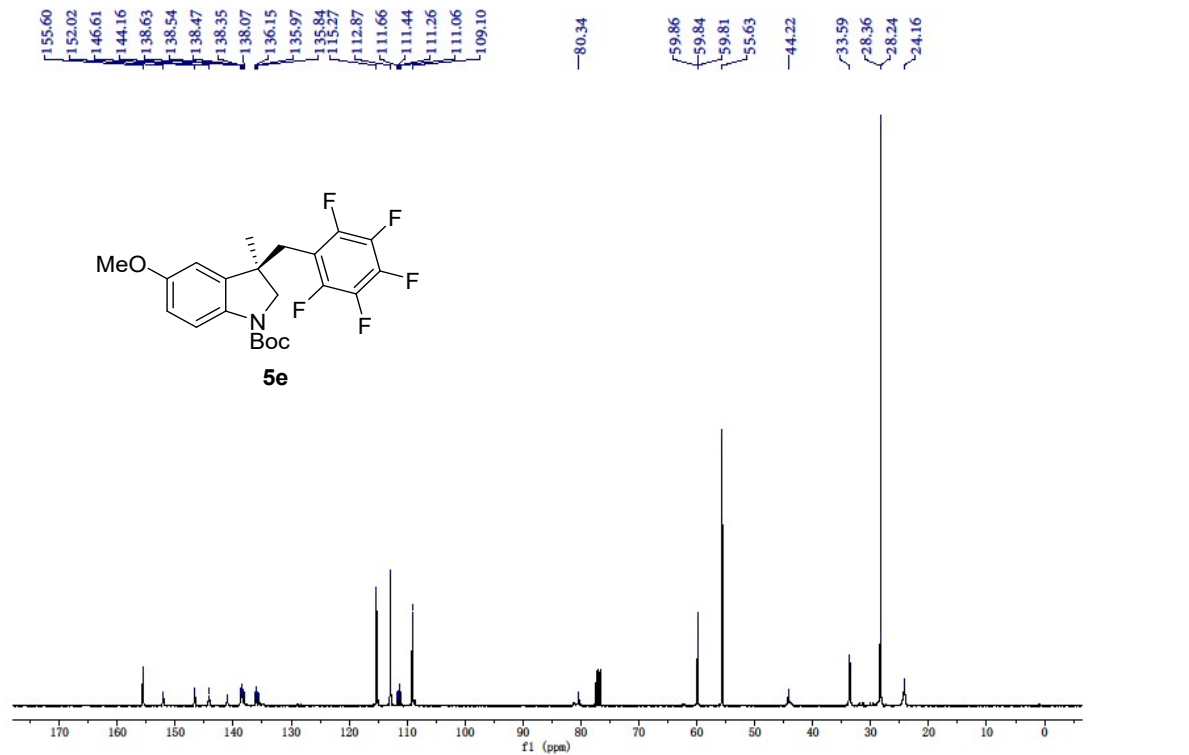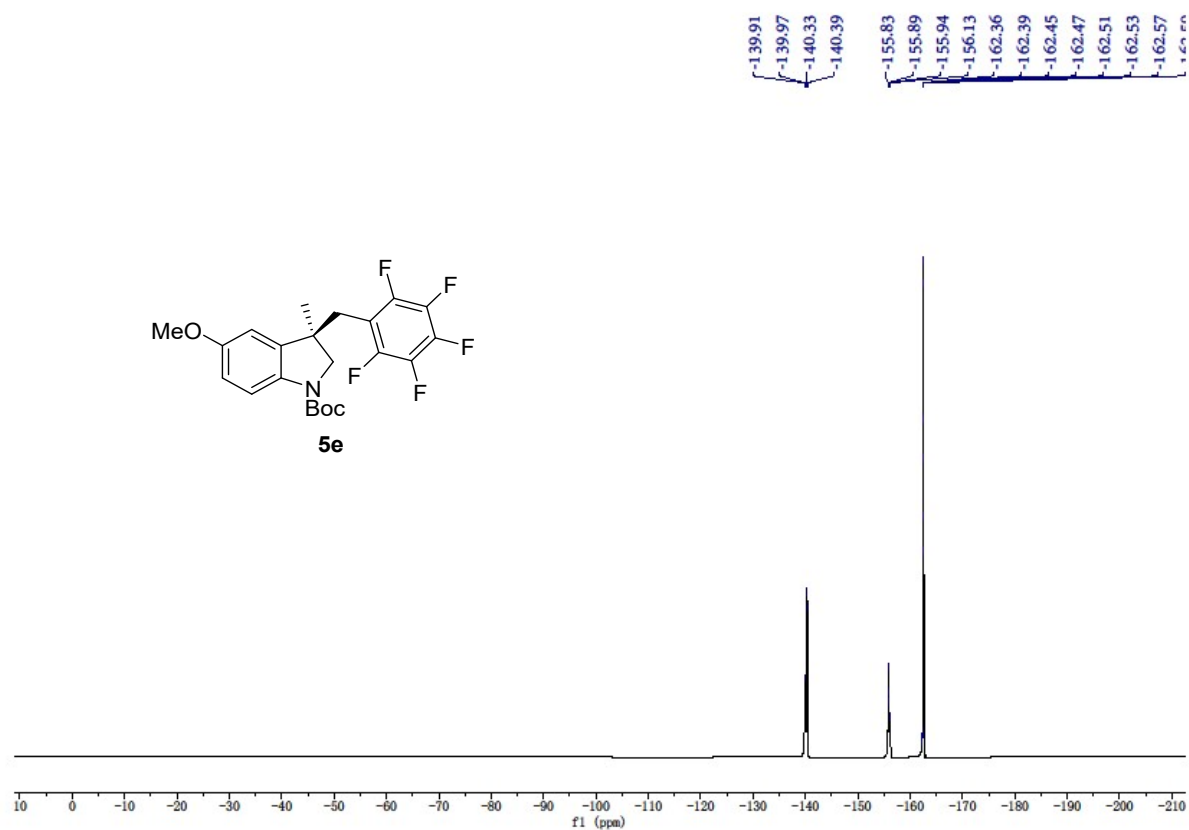

<Chromatogram>

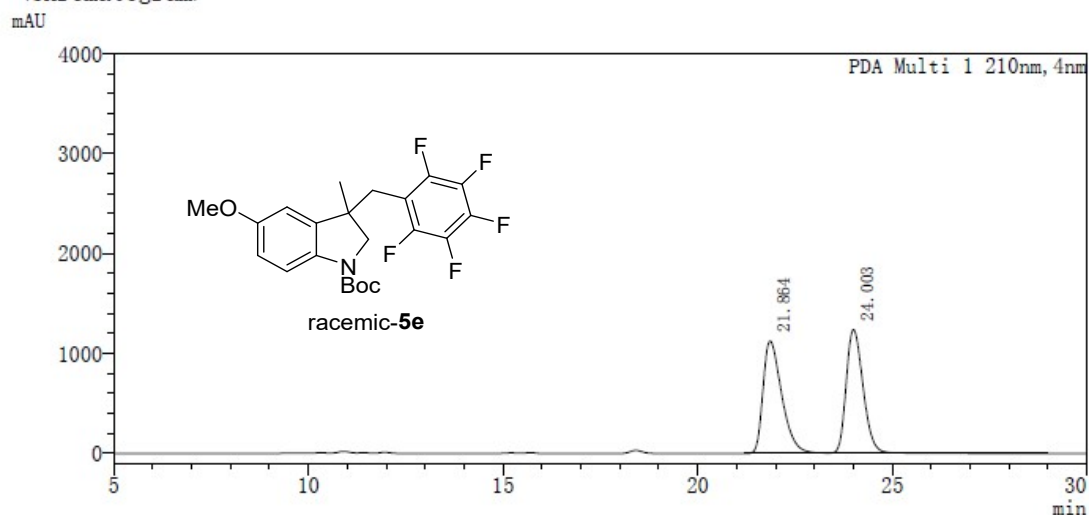

<Peak Table>

PDA Ch1 210nm

| No.   | Ret. Time (min) | Height  | Height% | Area     | Area%   |
|-------|-----------------|---------|---------|----------|---------|
| 1     | 21.864          | 1127208 | 47.620  | 37897519 | 49.976  |
| 2     | 24.003          | 1239897 | 52.380  | 37934401 | 50.024  |
| Total |                 | 2367105 | 100.000 | 75831920 | 100.000 |

<Chromatogram>

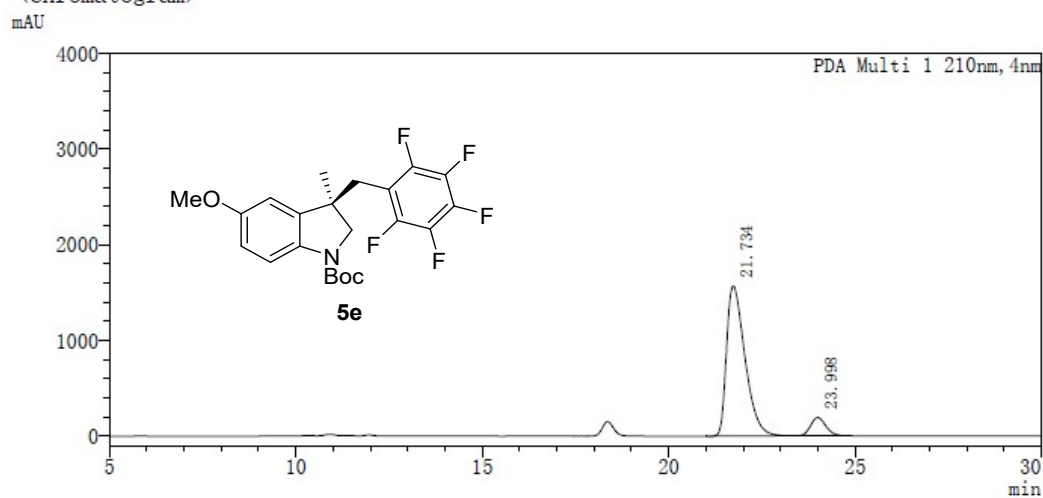

<Peak Table>

PDA Ch1 210nm

| No.   | Ret. Time (min) | Height  | Height% | Area     | Area%   |
|-------|-----------------|---------|---------|----------|---------|
| 1     | 21.734          | 1569451 | 89.264  | 53829598 | 90.971  |
| 2     | 23.998          | 188771  | 10.736  | 5342637  | 9.029   |
| Total |                 | 1758222 | 100.000 | 59172235 | 100.000 |

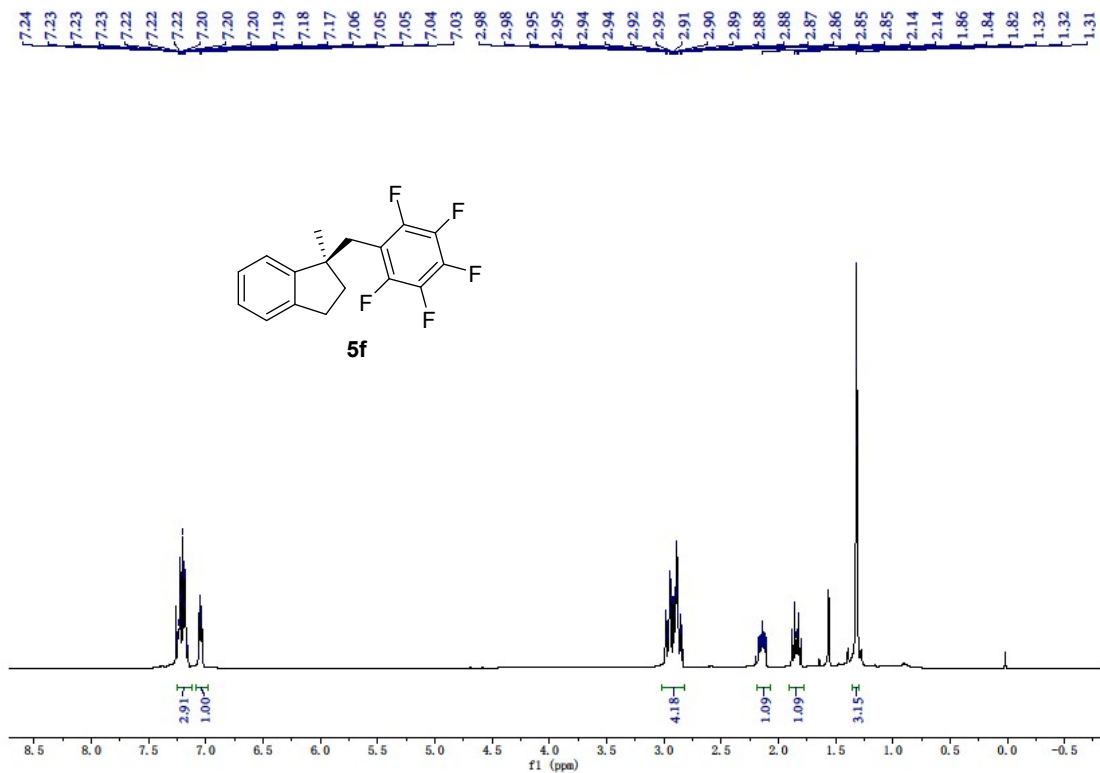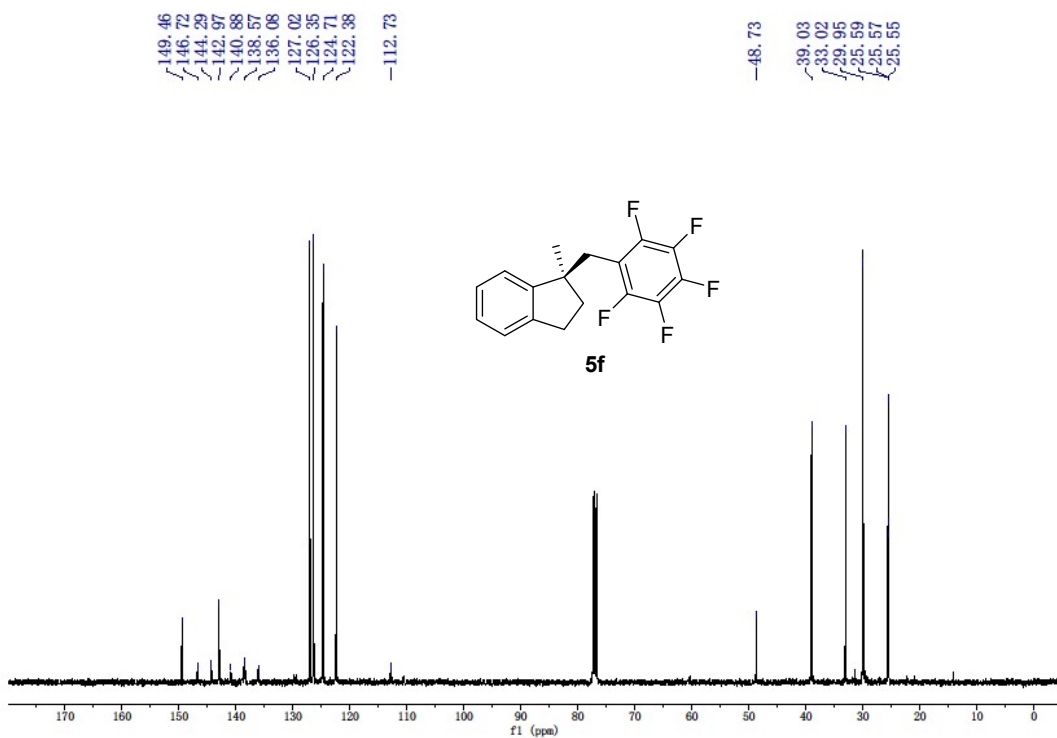

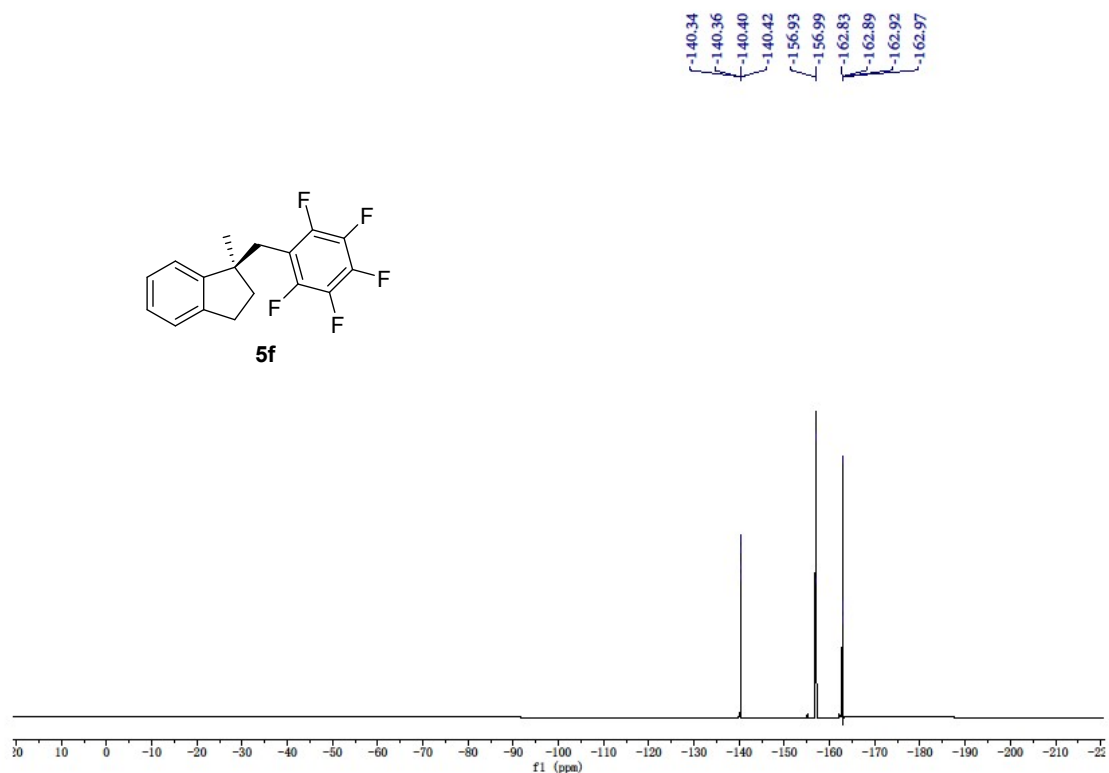

<Chromatogram>

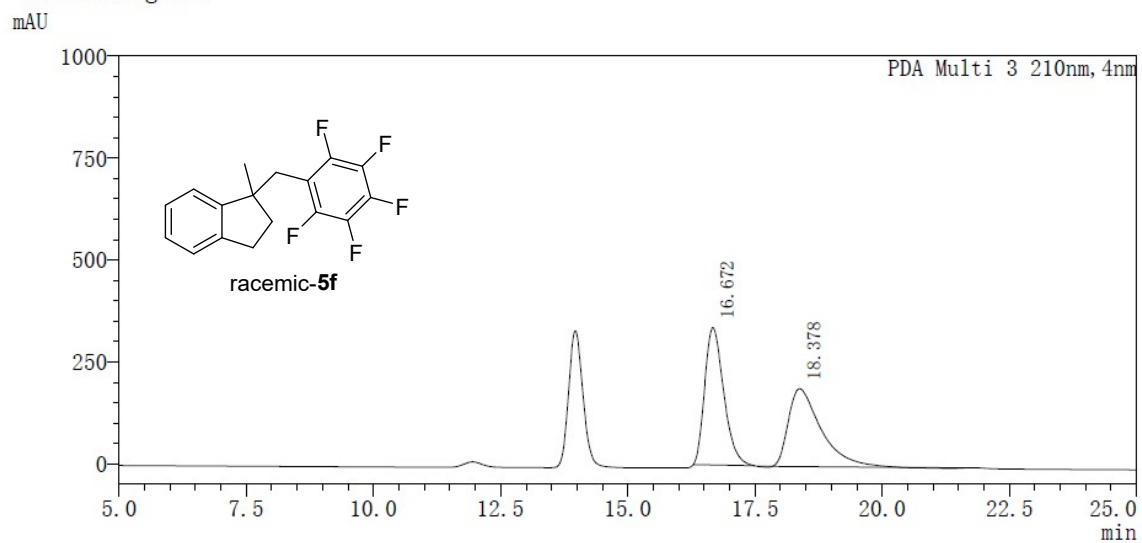

<Peak Table>

PDA Ch3 210nm

| No.   | Ret. Time (min) | Height | Height% | Area     | Area%   |
|-------|-----------------|--------|---------|----------|---------|
| 1     | 16.672          | 336510 | 63.838  | 8758341  | 50.754  |
| 2     | 18.378          | 190621 | 36.162  | 8498183  | 49.246  |
| Total |                 | 527132 | 100.000 | 17256524 | 100.000 |

<Chromatogram>

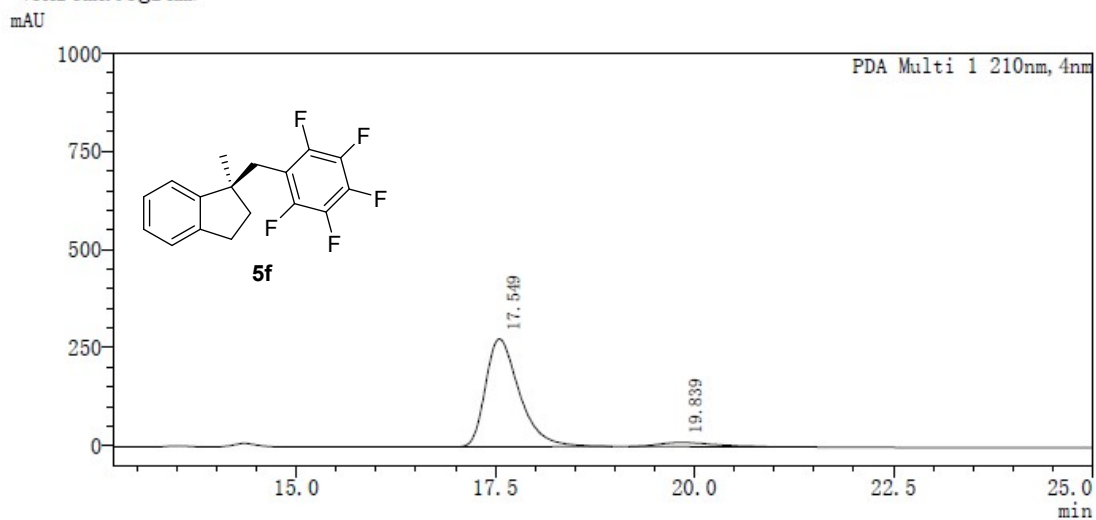

<Peak Table>

PDA Ch1 210nm

| No.   | Ret. Time(min) | Height | Height% | Area    | Area%   |
|-------|----------------|--------|---------|---------|---------|
| 1     | 17.549         | 274868 | 96.354  | 8157942 | 93.961  |
| 2     | 19.839         | 10401  | 3.646   | 524312  | 6.039   |
| Total |                | 285270 | 100.000 | 8682254 | 100.000 |

7.18 7.16 7.14 7.04 7.03 7.02 7.01 6.99 6.96 6.97 6.96 6.94 6.94 6.92 6.91 6.89 6.87 6.80 6.79 4.55 4.52 4.13 4.11 3.13 3.12 3.09 3.09 3.08 3.06 3.06 3.05 3.02 3.02 3.01 1.41 1.41

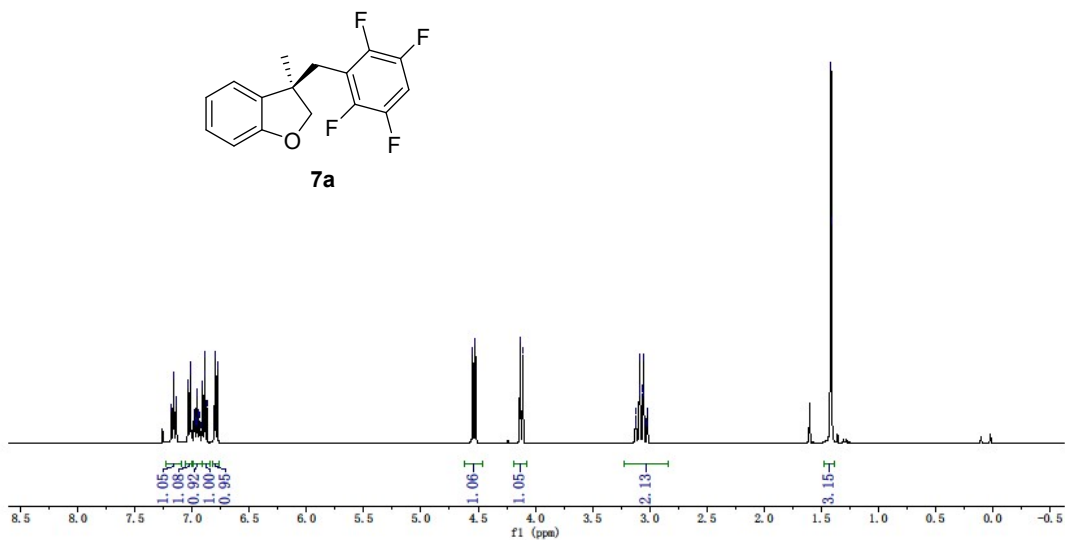

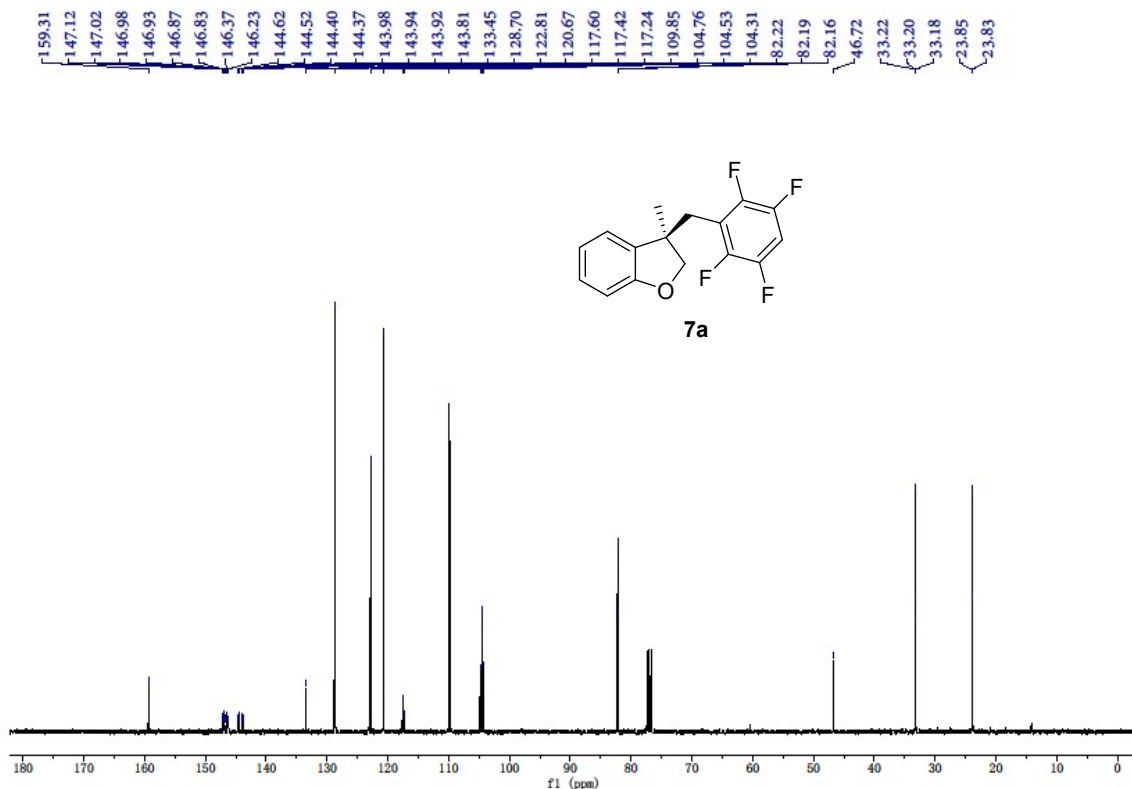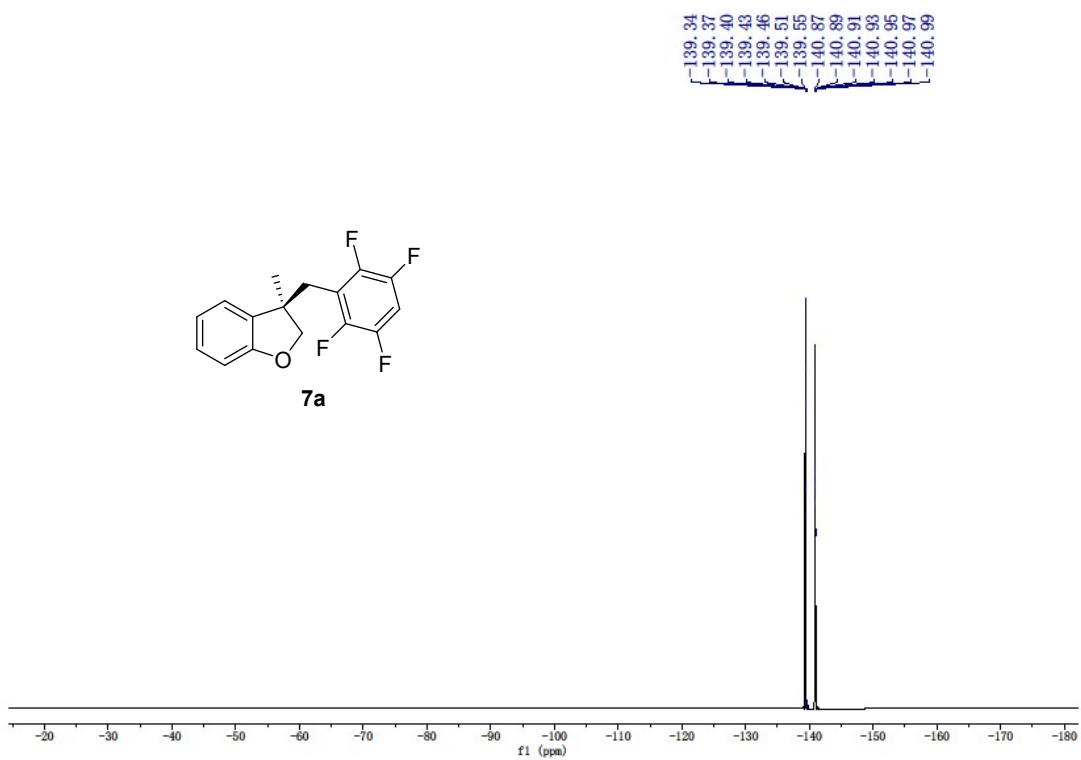

<Chromatogram>

mV

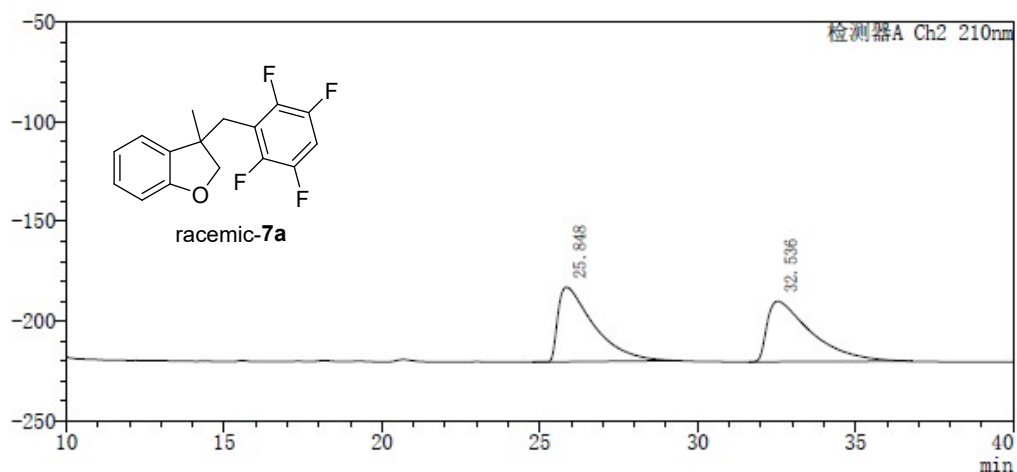

<Peak Table>

检测器A Ch2 210nm

| No.   | Ret. Time(min) | Height | Height% | Area    | Area%   |
|-------|----------------|--------|---------|---------|---------|
| 1     | 25.848         | 37454  | 55.260  | 2949380 | 50.061  |
| 2     | 32.536         | 30323  | 44.740  | 2942142 | 49.939  |
| Total |                | 67777  | 100.000 | 5891522 | 100.000 |

<Chromatogram>

mV

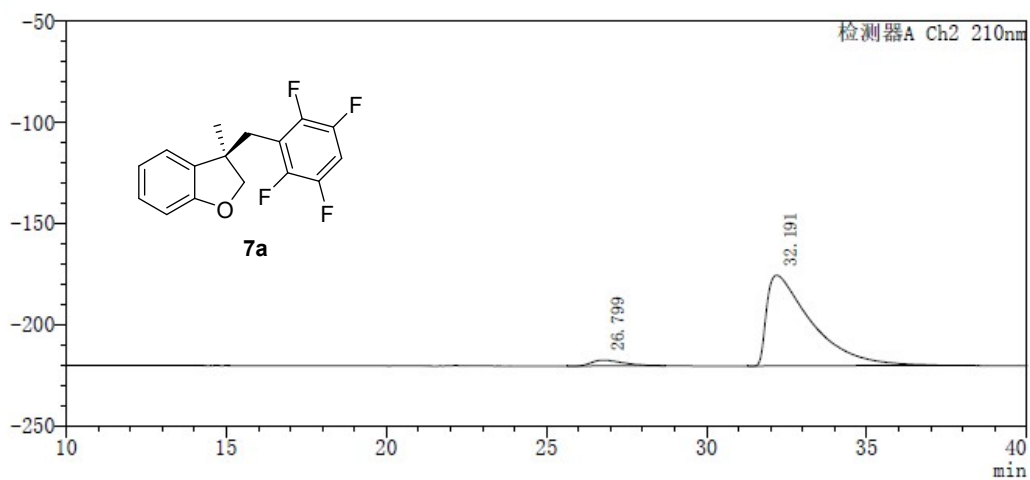

<Peak Table>

检测器A Ch2 210nm

| No.   | Ret. Time(min) | Height | Height% | Area    | Area%   |
|-------|----------------|--------|---------|---------|---------|
| 1     | 26.799         | 2898   | 6.073   | 198478  | 4.354   |
| 2     | 32.191         | 44830  | 93.927  | 4359740 | 95.646  |
| Total |                | 47728  | 100.000 | 4558218 | 100.000 |

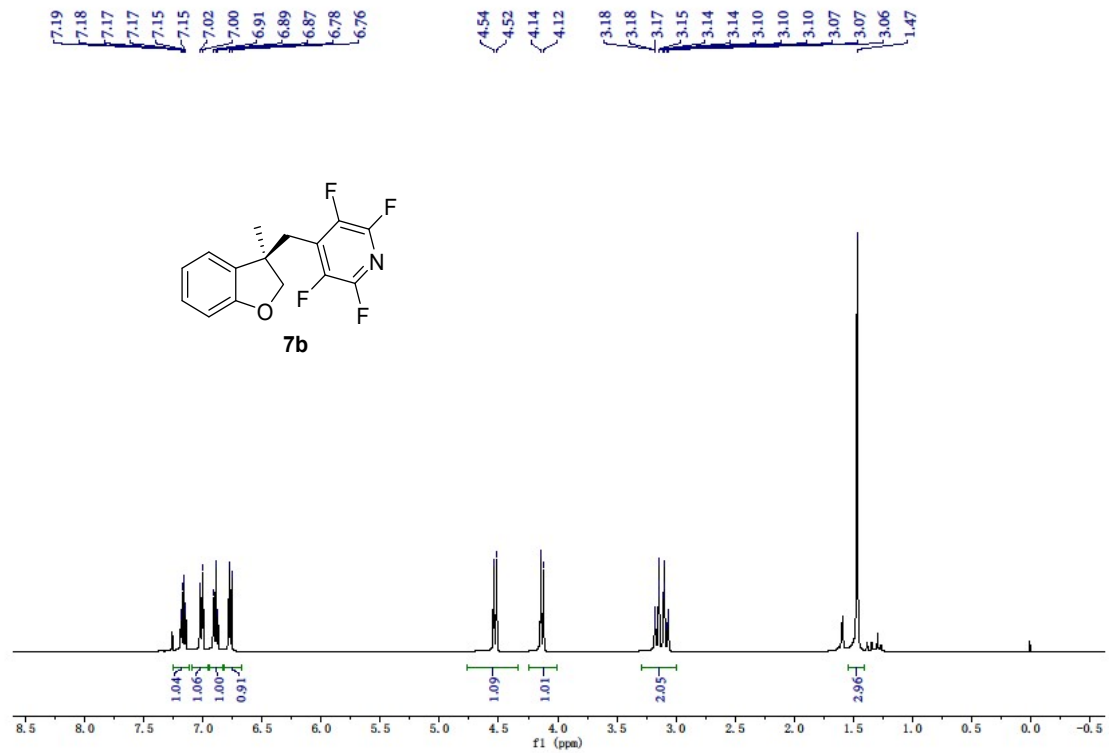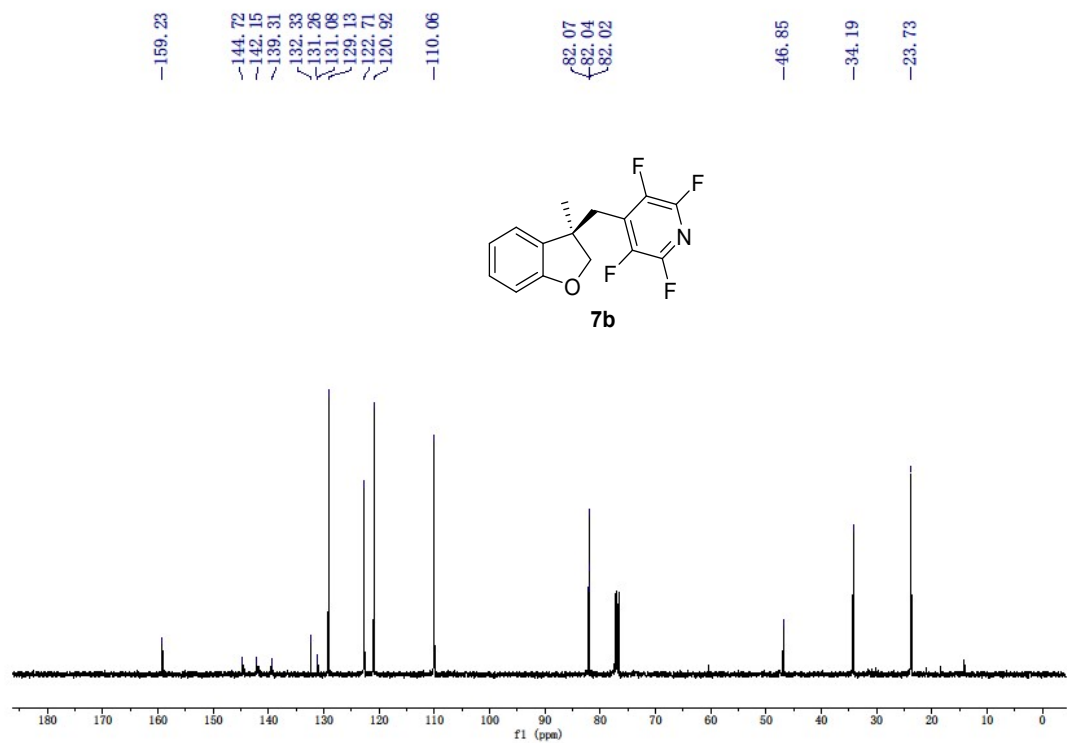



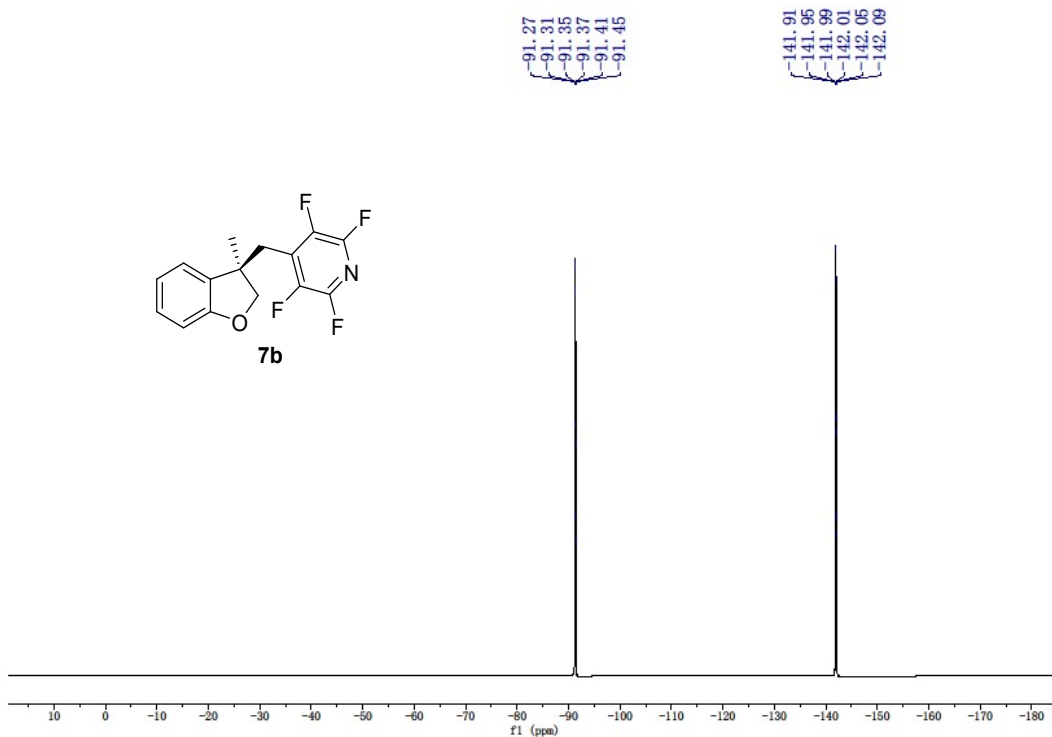

<Chromatogram>

mV

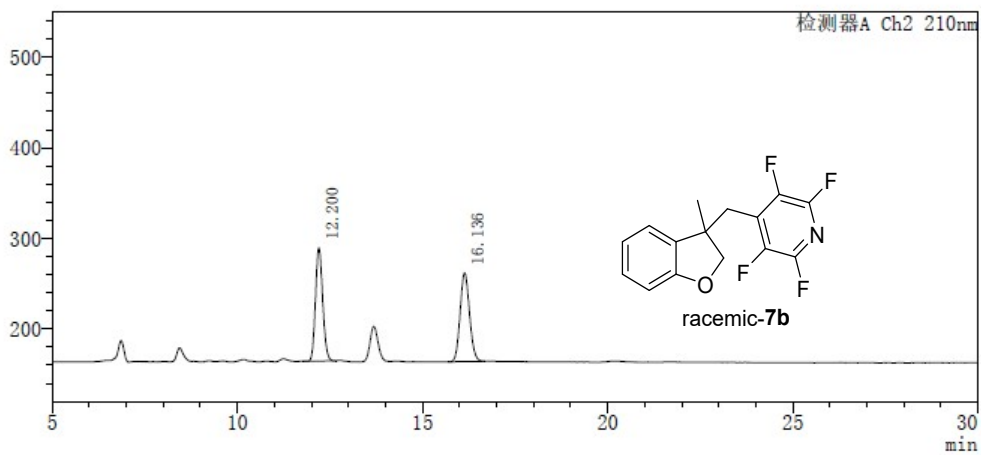

<Peak Table>

检测器A Ch2 210nm

| No.   | Ret. Time (min) | Height | Height% | Area    | Area%   |
|-------|-----------------|--------|---------|---------|---------|
| 1     | 12.200          | 124859 | 56.076  | 1692671 | 49.472  |
| 2     | 16.136          | 97802  | 43.924  | 1728814 | 50.528  |
| Total |                 | 222662 | 100.000 | 3421484 | 100.000 |

<Chromatogram>

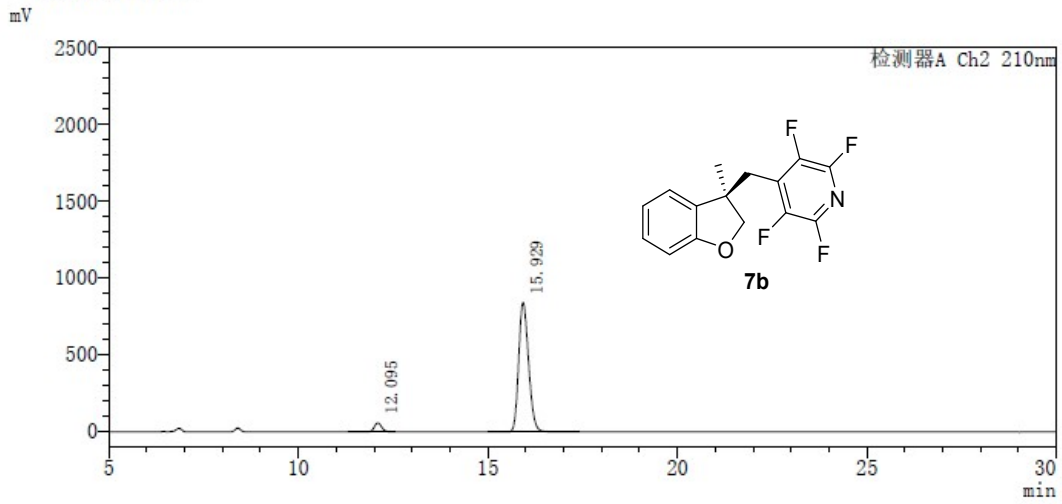

<Peak Table>

检测器A Ch2 210nm

| No.   | Ret. Time (min) | Height | Height% | Area     | Area%   |
|-------|-----------------|--------|---------|----------|---------|
| 1     | 12.095          | 58242  | 6.456   | 801235   | 4.972   |
| 2     | 15.929          | 843853 | 93.544  | 15313729 | 95.028  |
| Total |                 | 902095 | 100.000 | 16114965 | 100.000 |

7.18 7.17 7.16 7.16 7.16 7.14 7.14 7.14 7.04 7.04 7.02 7.02 7.02 6.91 6.90 6.89 6.88 6.87 6.87 6.80 6.80 6.78 6.78 4.52 4.50 4.12 4.10 4.07 4.06 4.06 3.05 3.04 3.04 3.01 3.01 3.01 2.99 2.99 2.98 2.96 2.95 2.95 1.40 1.39 1.39

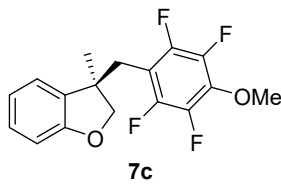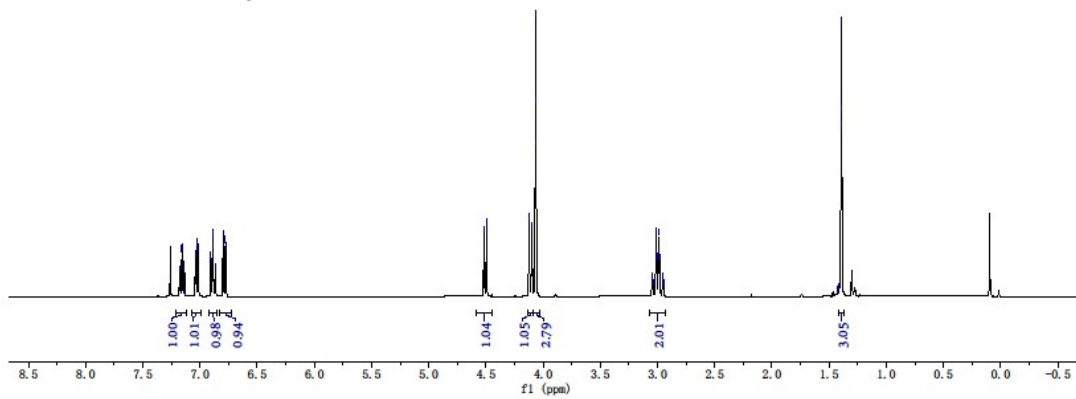

159.31  
146.77  
144.30  
141.84  
139.39  
133.59  
128.65  
128.62  
122.82  
120.63  
109.80

82.16  
82.13

62.07  
62.04  
62.00

46.67

32.62

23.88

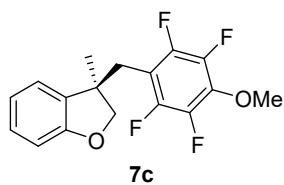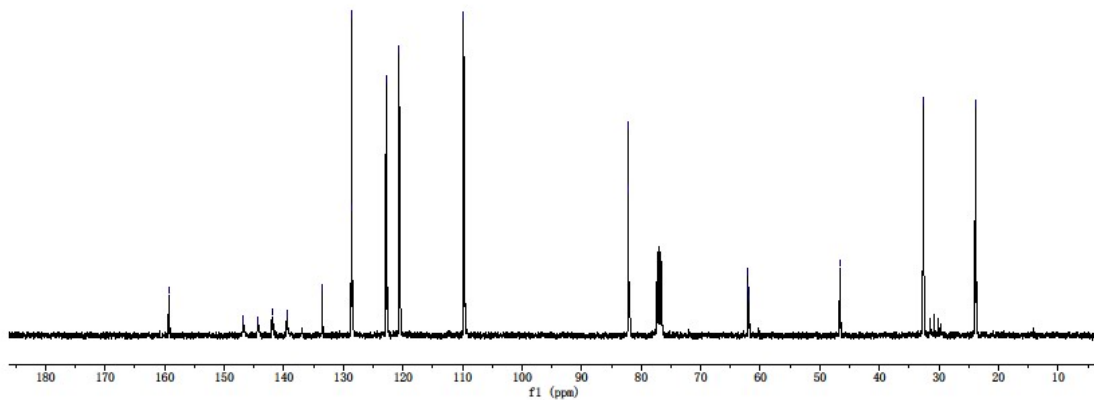

142.03  
142.06  
142.08  
142.12  
142.14  
142.20  
142.28  
142.31  
142.34  
142.37  
158.21  
158.24  
158.26  
158.30  
158.32  
158.38  
158.46  
158.49  
158.52  
158.55

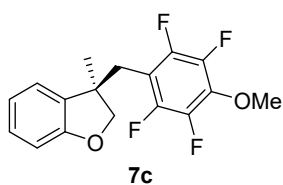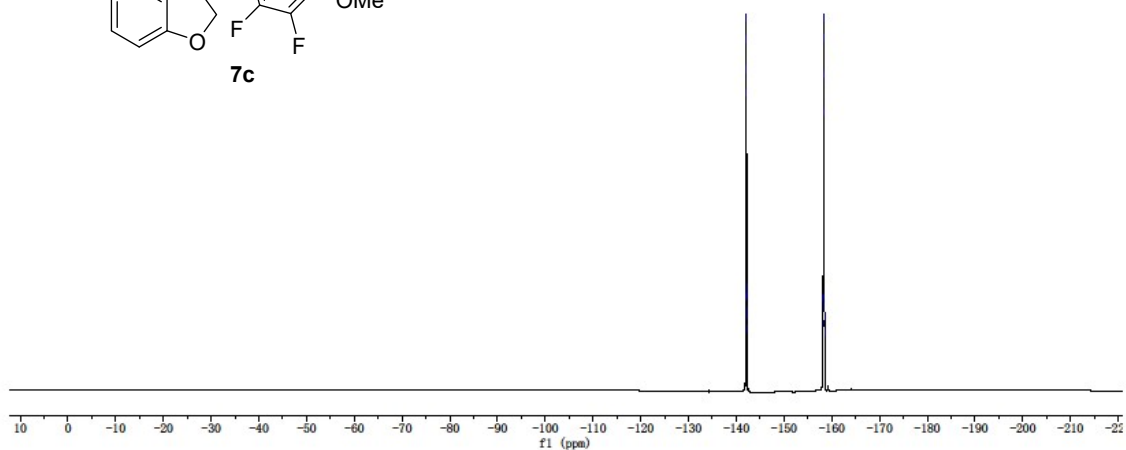

<Chromatogram>

mAU

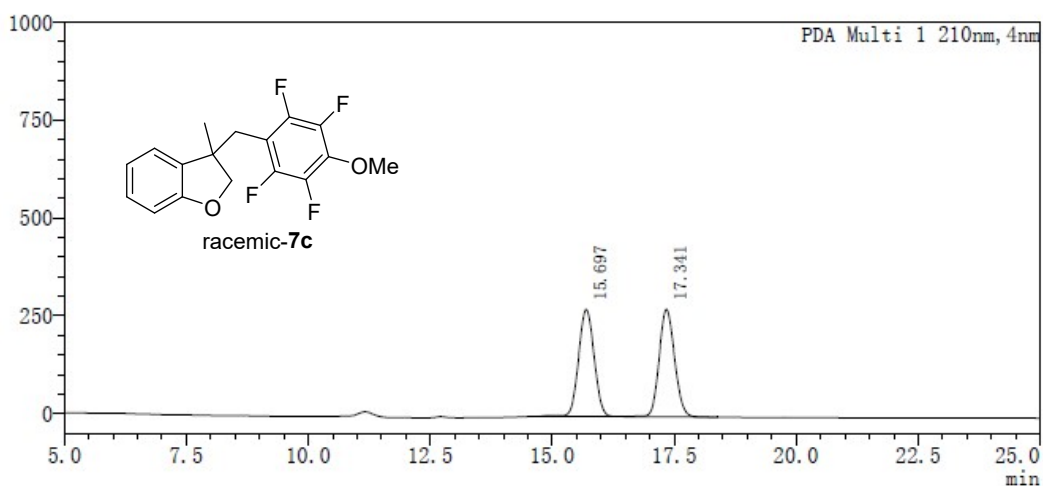

<Peak Table>

PDA Ch1 210nm

| No.   | Ret. Time(min) | Height | Height% | Area     | Area%   |
|-------|----------------|--------|---------|----------|---------|
| 1     | 15.697         | 273395 | 49.884  | 6067721  | 50.125  |
| 2     | 17.341         | 274668 | 50.116  | 6037466  | 49.875  |
| Total |                | 548063 | 100.000 | 12105188 | 100.000 |

<Chromatogram>

mAU

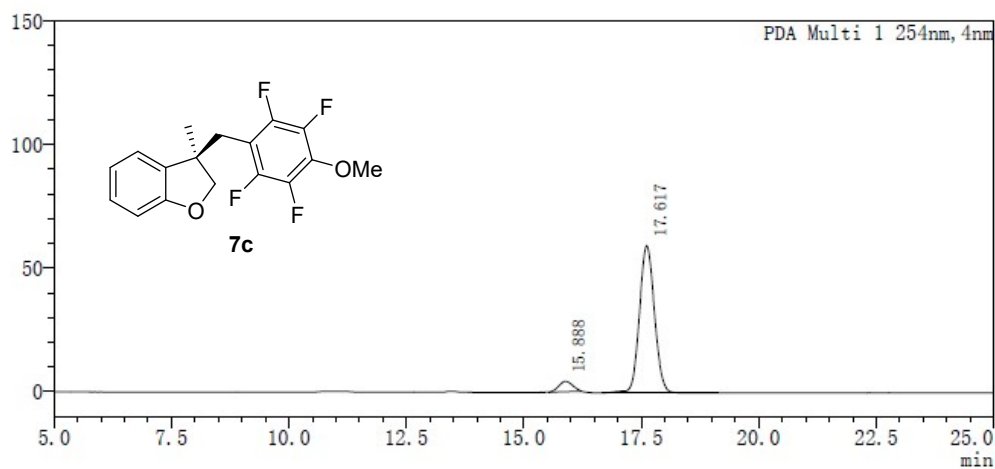

<Peak Table>

PDA Ch1 254nm

| No.   | Ret. Time(min) | Height | Height% | Area    | Area%   |
|-------|----------------|--------|---------|---------|---------|
| 1     | 15.888         | 4120   | 6.474   | 83952   | 5.980   |
| 2     | 17.617         | 59519  | 93.526  | 1319909 | 94.020  |
| Total |                | 63639  | 100.000 | 1403862 | 100.000 |

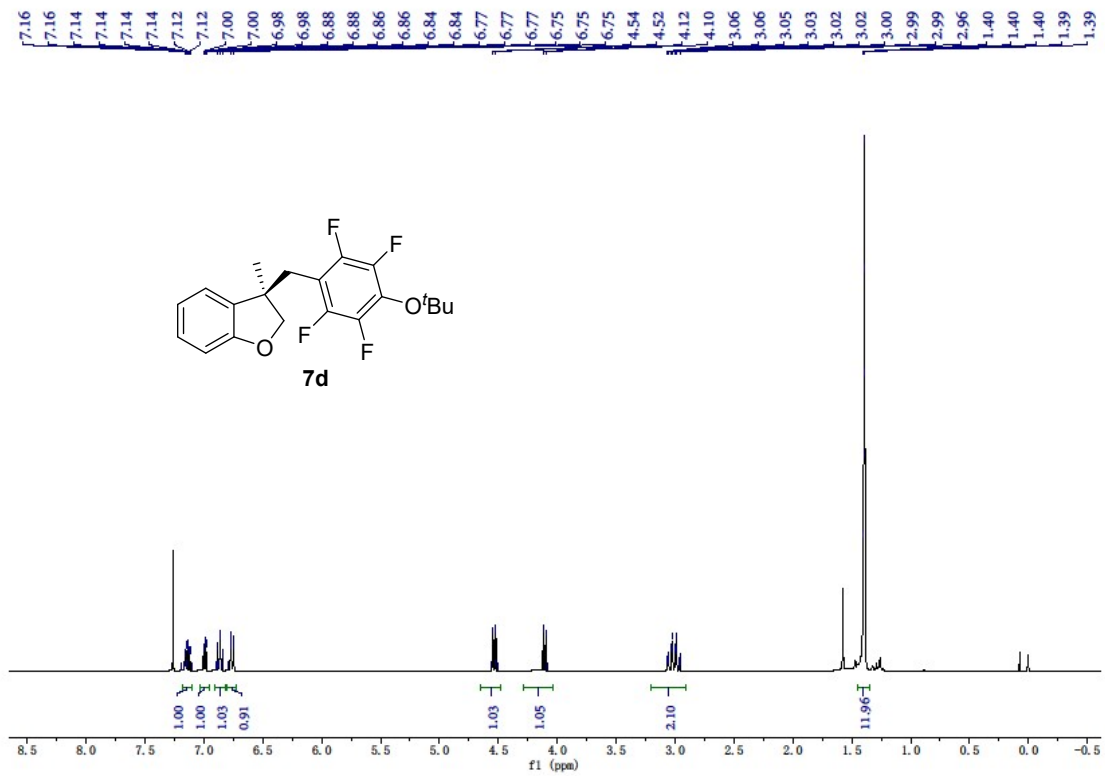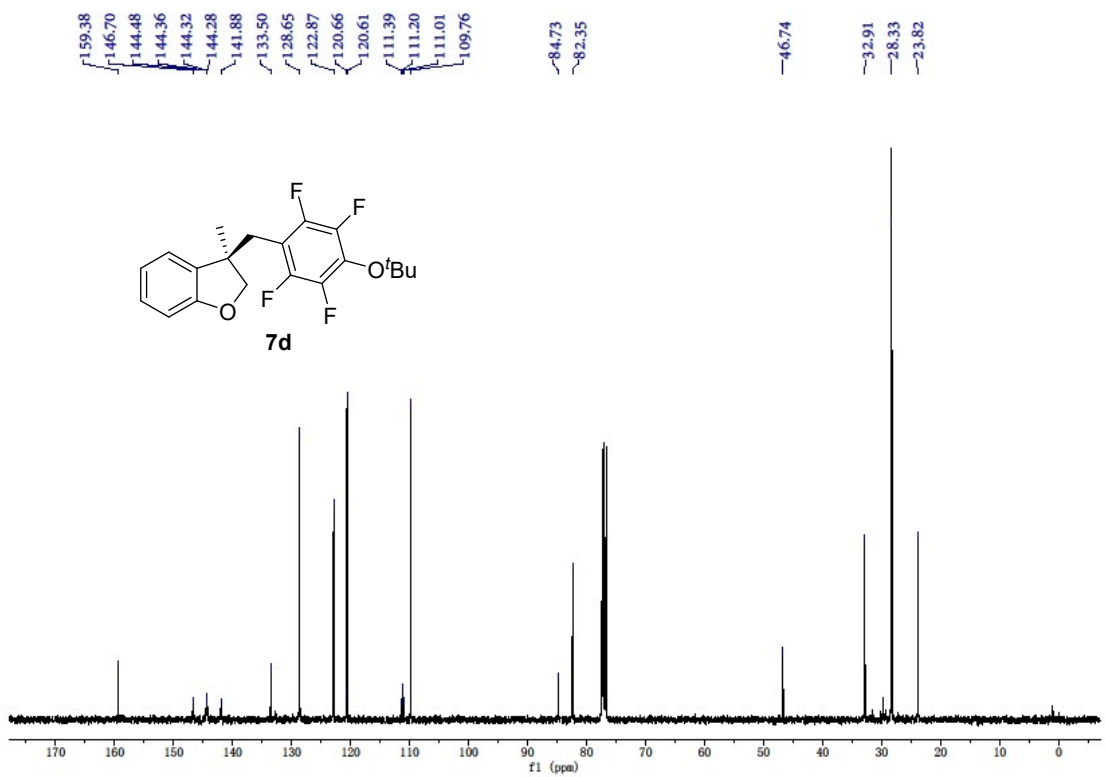

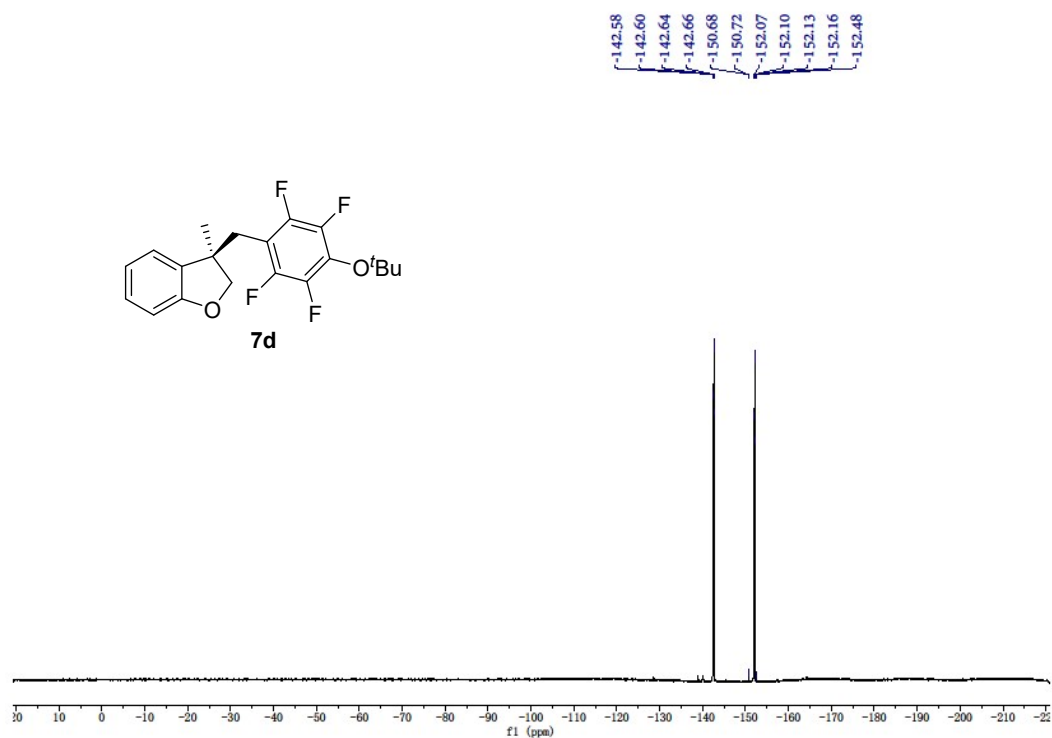

<Chromatogram>

mAU

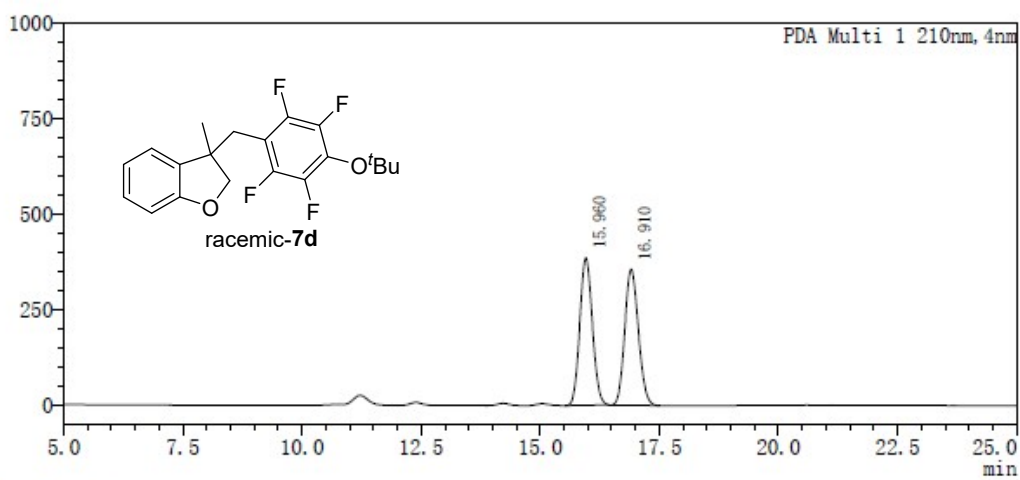

<Peak Table>

PDA Ch1 210nm

| No.   | Ret. Time (min) | Height | Height% | Area     | Area%   |
|-------|-----------------|--------|---------|----------|---------|
| 1     | 15.960          | 386409 | 52.001  | 7090008  | 49.992  |
| 2     | 16.910          | 356677 | 47.999  | 7092228  | 50.008  |
| Total |                 | 743086 | 100.000 | 14182236 | 100.000 |

<Chromatogram>

mAU

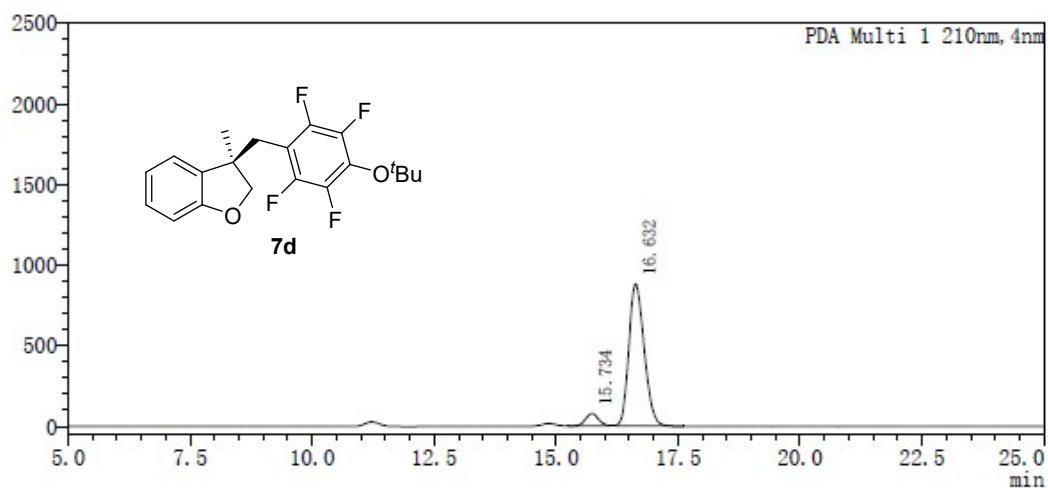

<Peak Table>

PDA Ch1 210nm

| No.   | Ret. Time (min) | Height | Height% | Area     | Area%   |
|-------|-----------------|--------|---------|----------|---------|
| 1     | 15.734          | 75638  | 7.919   | 1364831  | 6.627   |
| Total | 16.632          | 879472 | 92.081  | 19231212 | 93.373  |
| 总计    |                 | 955109 | 100.000 | 20596042 | 100.000 |

7.89 7.64 7.64 7.63 7.62 7.62 7.61 7.60 7.60 7.59 7.59 7.57 7.35 7.33 7.21 7.21 7.21 7.11 7.11 7.09 7.09 6.96 6.94 6.94 6.86 6.86 6.86 6.84 6.84 6.84 6.68 6.68 6.66 6.66 4.62 4.59 4.19 4.17 4.17 3.13 3.10 3.10 1.49 1.49 1.48

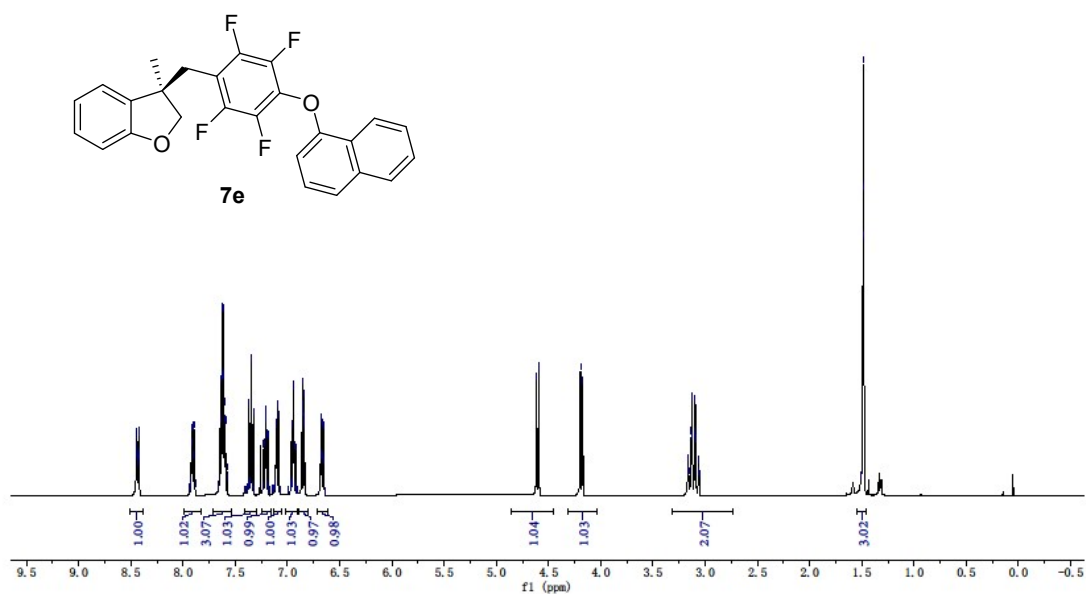

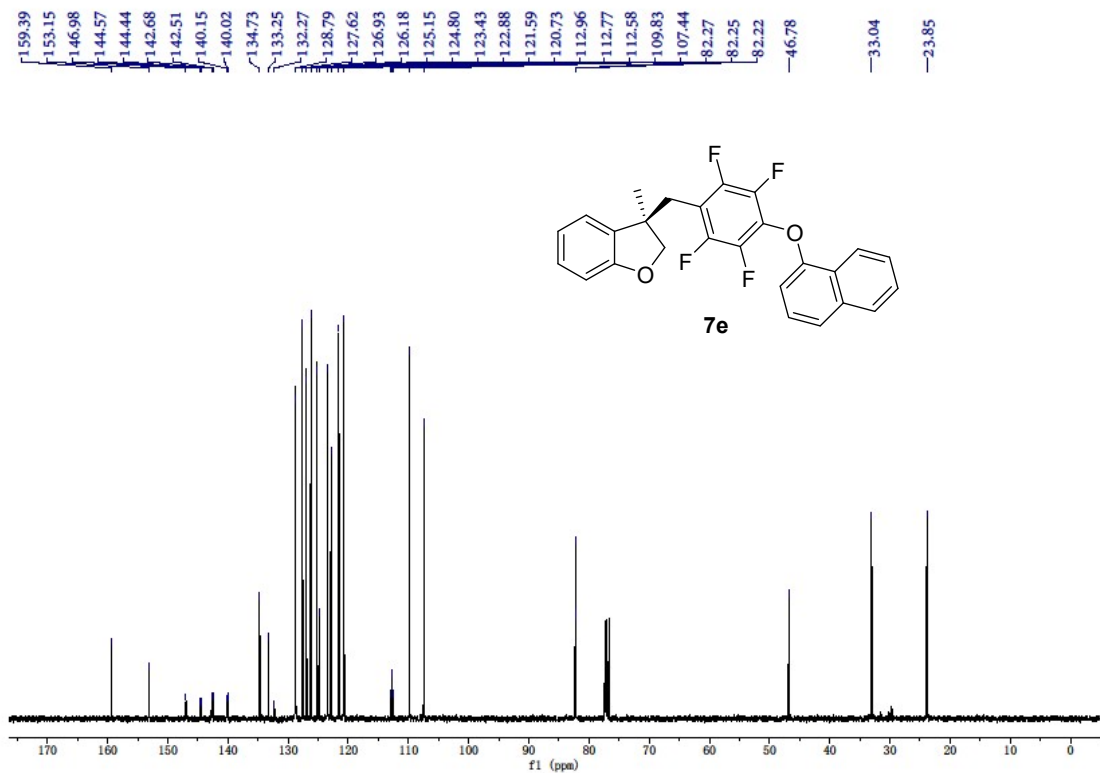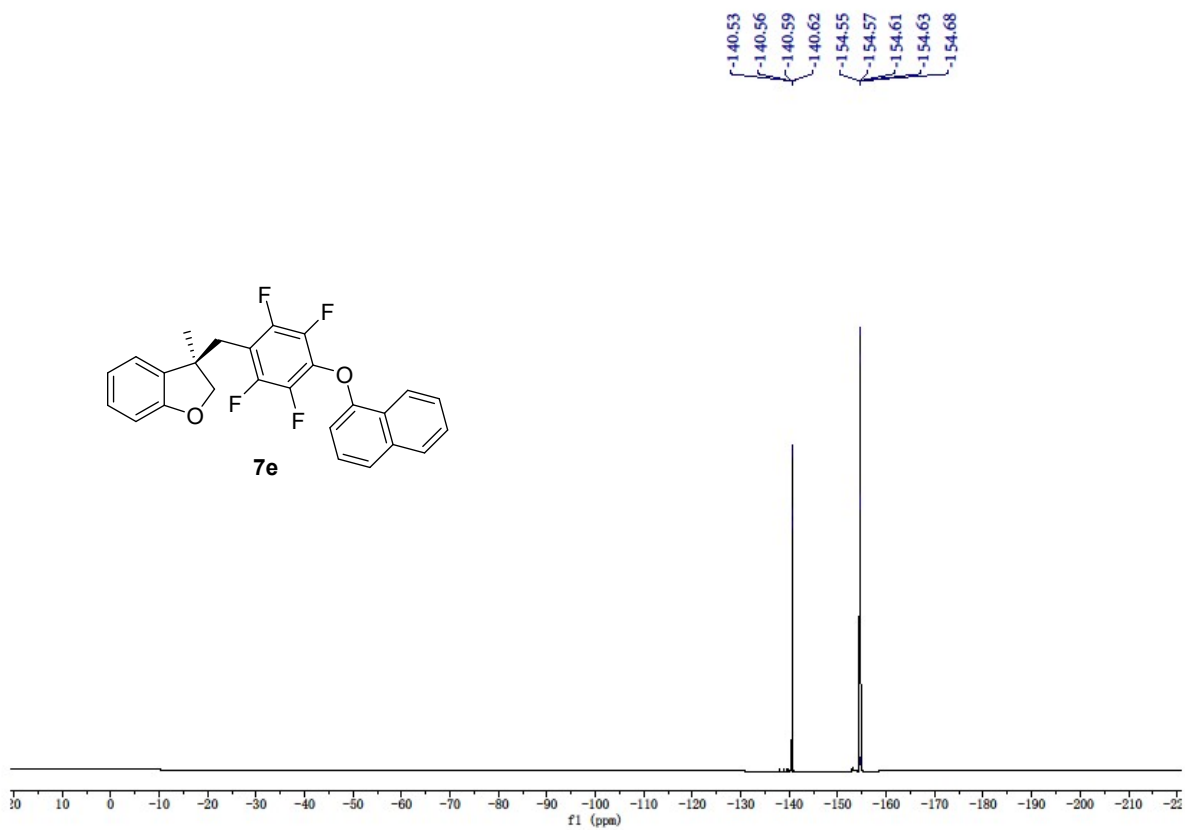



<Chromatogram>

mAU

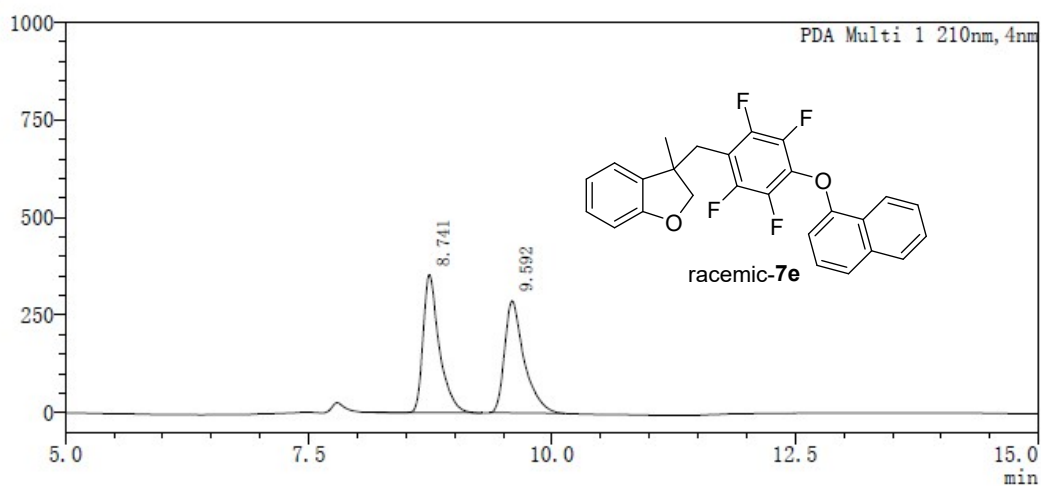

<Peak Table>

PDA Ch1 210nm

| No.   | Ret. Time(min) | Height | Height% | Area    | Area%   |
|-------|----------------|--------|---------|---------|---------|
| 1     | 8.741          | 352827 | 55.185  | 4082899 | 50.385  |
| 2     | 9.592          | 286528 | 44.815  | 4020496 | 49.615  |
| Total |                | 639355 | 100.000 | 8103395 | 100.000 |

<Chromatogram>

mAU

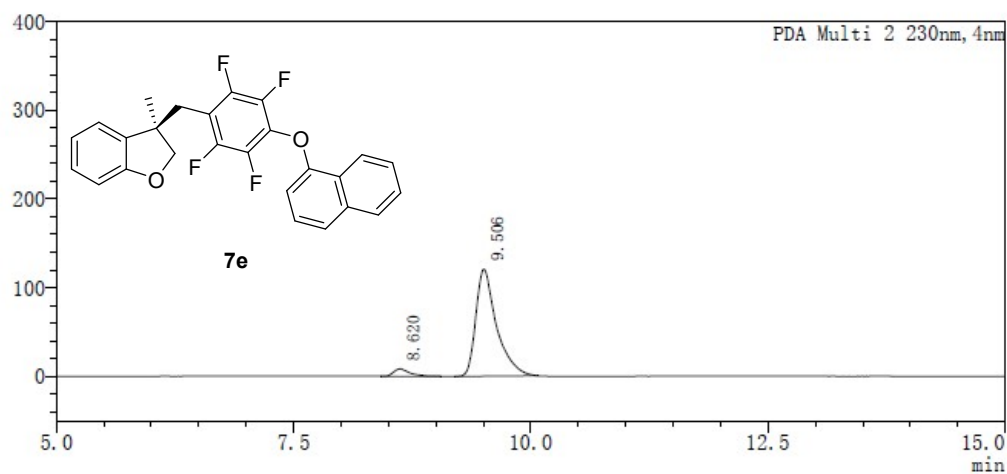

<Peak Table>

PDA Ch2 230nm

| No.   | Ret. Time(min) | Height | Height% | Area    | Area%   |
|-------|----------------|--------|---------|---------|---------|
| 1     | 8.620          | 8343   | 6.472   | 98781   | 5.114   |
| 2     | 9.506          | 120565 | 93.528  | 1832677 | 94.886  |
| Total |                | 128908 | 100.000 | 1931458 | 100.000 |

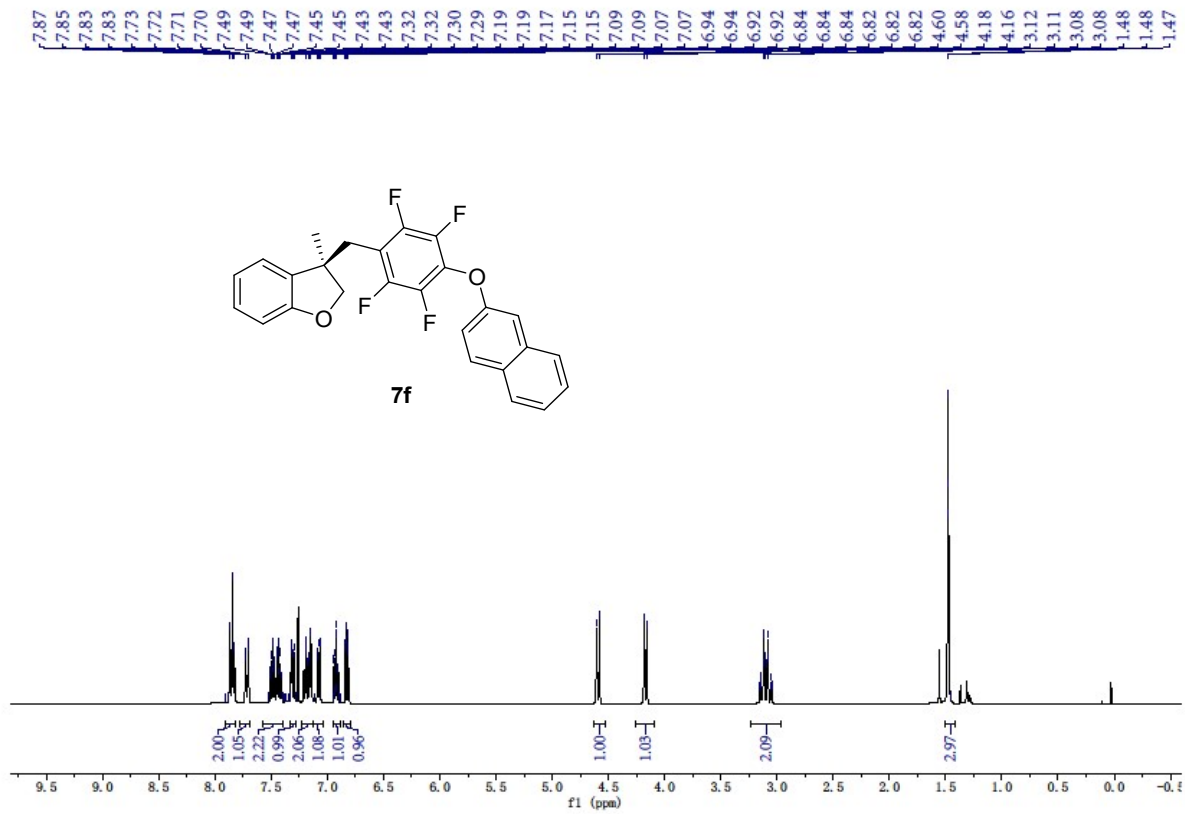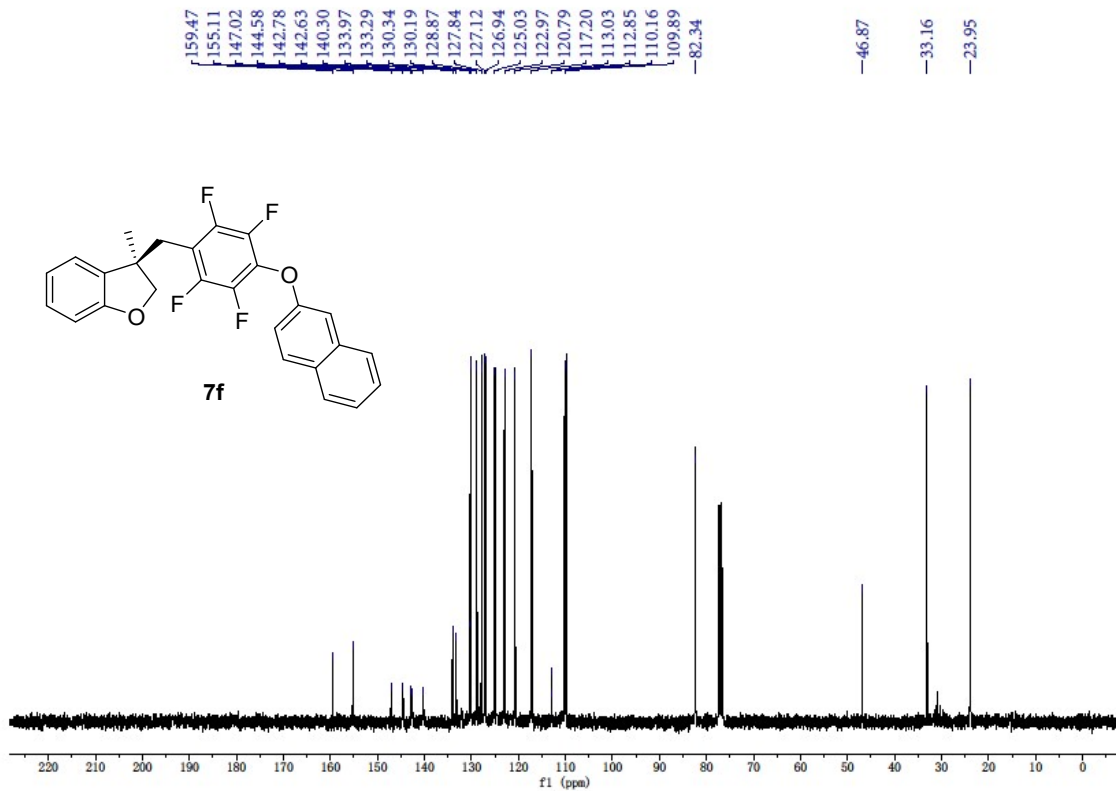

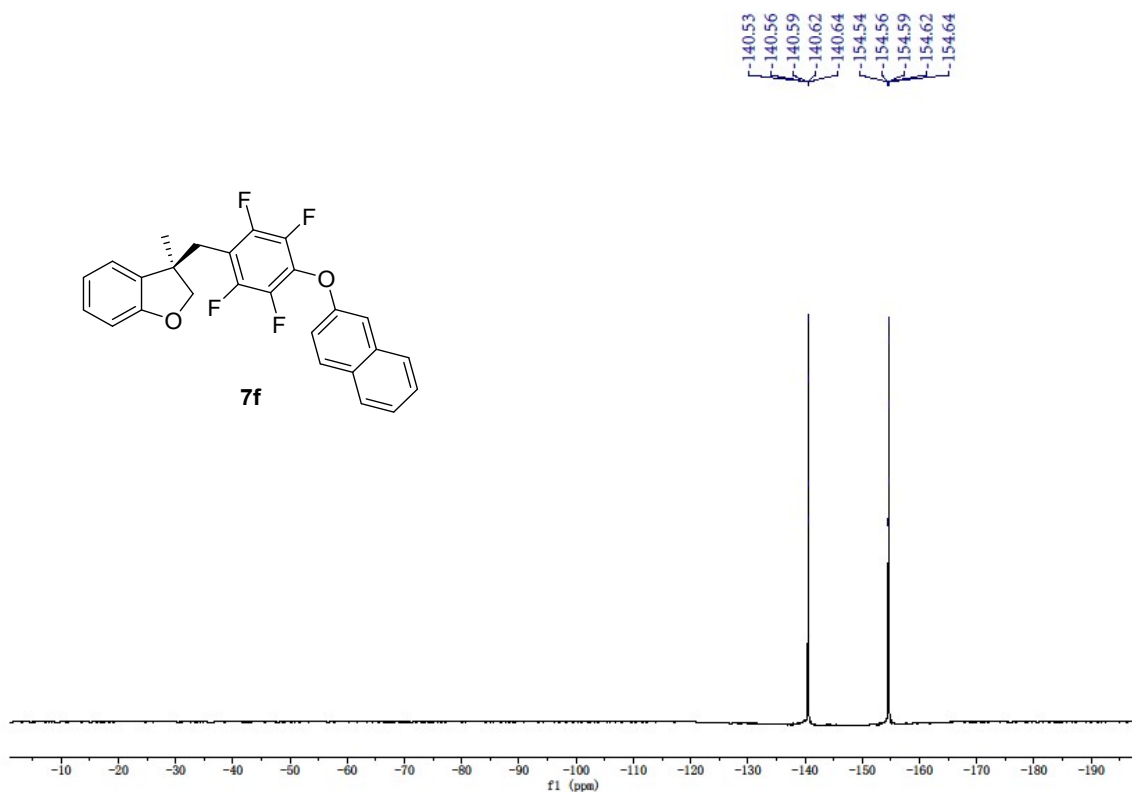

<Chromatogram>

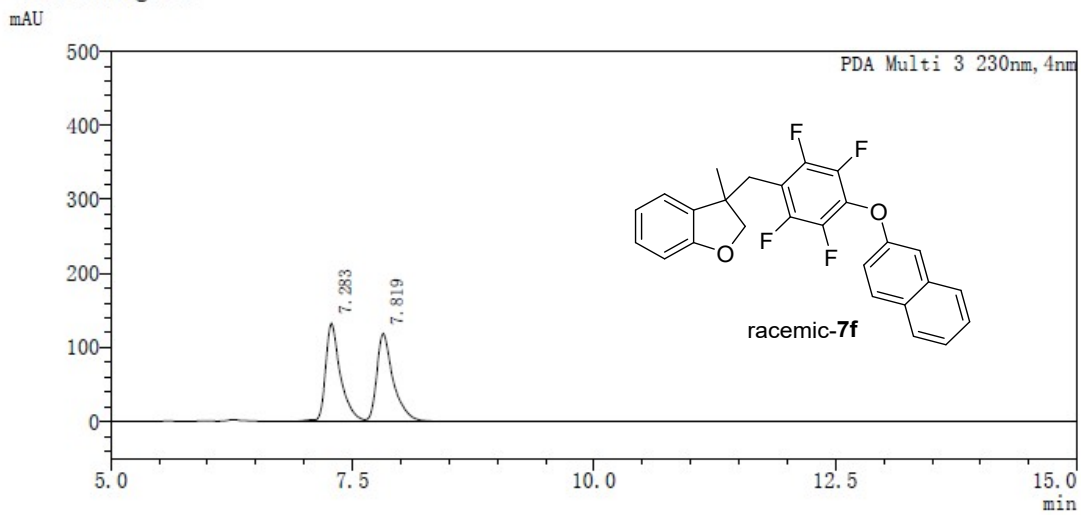

<Peak Table>

PDA Ch3 230nm

| No.   | Ret. Time (min) | Height | Height% | Area    | Area%   |
|-------|-----------------|--------|---------|---------|---------|
| 1     | 7.283           | 132265 | 52.722  | 1410528 | 50.166  |
| 2     | 7.819           | 118609 | 47.278  | 1401178 | 49.834  |
| Total |                 | 250874 | 100.000 | 2811706 | 100.000 |

<Chromatogram>

mAU

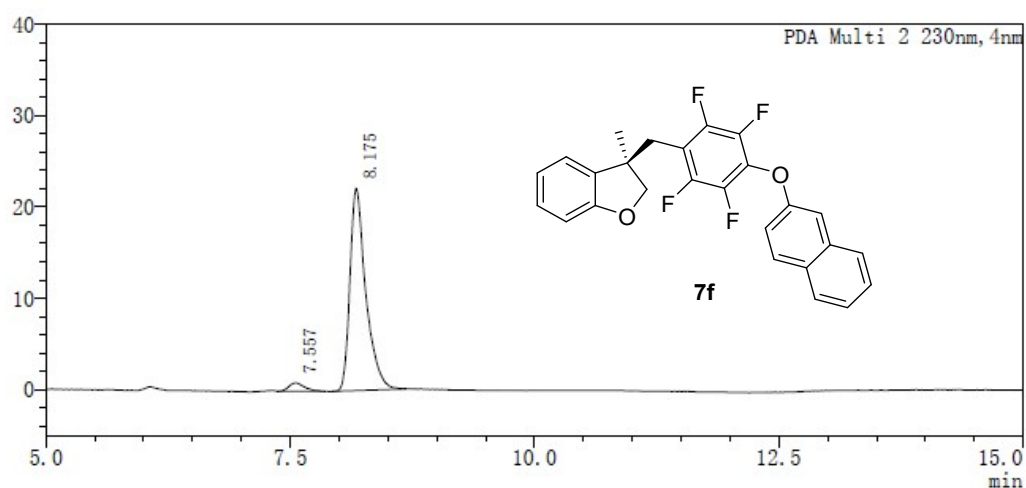

<Peak Table>

PDA Ch2 230nm

| No.   | Ret. Time (min) | Height | Height% | Area   | Area%   |
|-------|-----------------|--------|---------|--------|---------|
| 1     | 7.557           | 904    | 3.925   | 9808   | 3.775   |
| 2     | 8.175           | 22117  | 96.075  | 250023 | 96.225  |
| Total |                 | 23021  | 100.000 | 259831 | 100.000 |

8.07  
8.05  
7.84  
7.83  
7.82  
7.81  
7.68  
7.65  
7.59  
7.58  
7.56  
7.48  
7.48  
7.48  
7.46  
7.46  
7.19  
7.19  
7.17  
7.17  
7.08  
7.08  
7.06  
7.06  
6.96  
6.96  
6.94  
6.92  
6.90  
6.84  
6.82  
4.59  
4.56  
4.17  
4.15  
3.10  
3.09  
3.09  
3.07  
3.06  
3.06  
2.75  
1.46

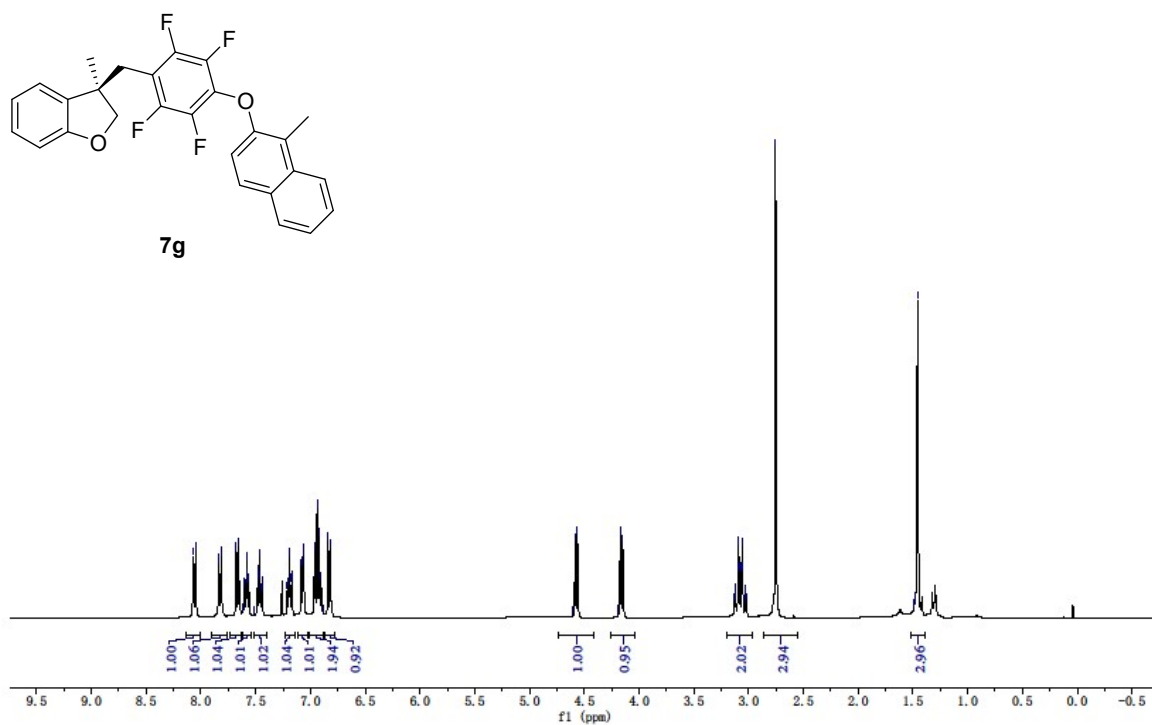

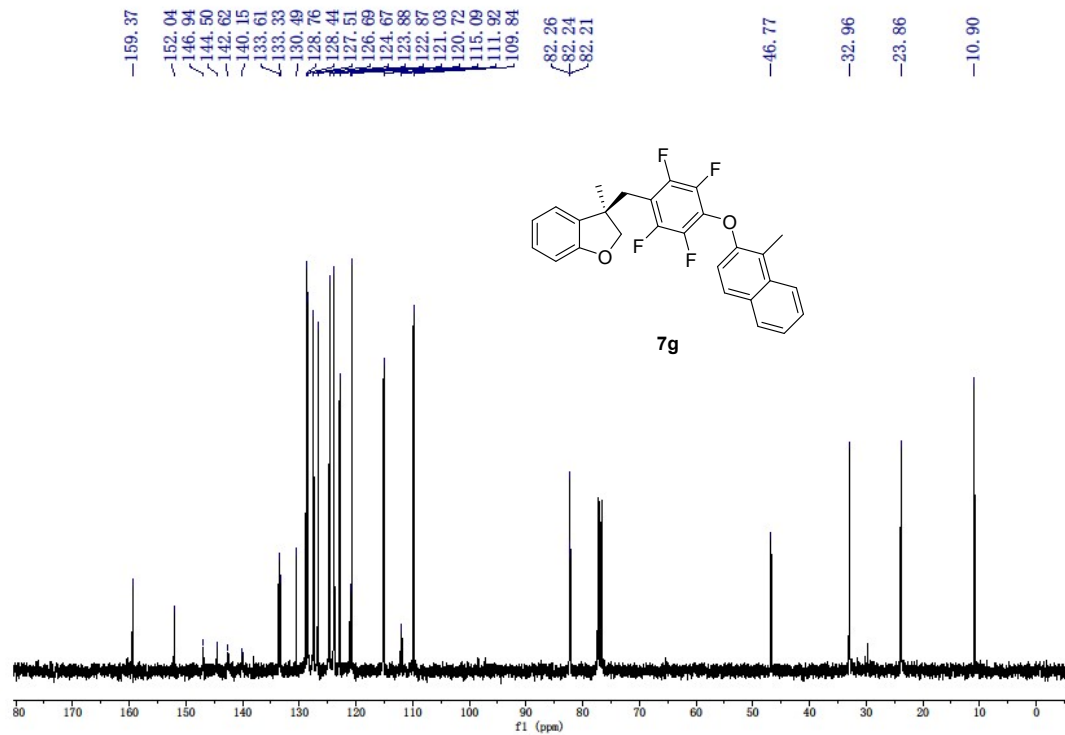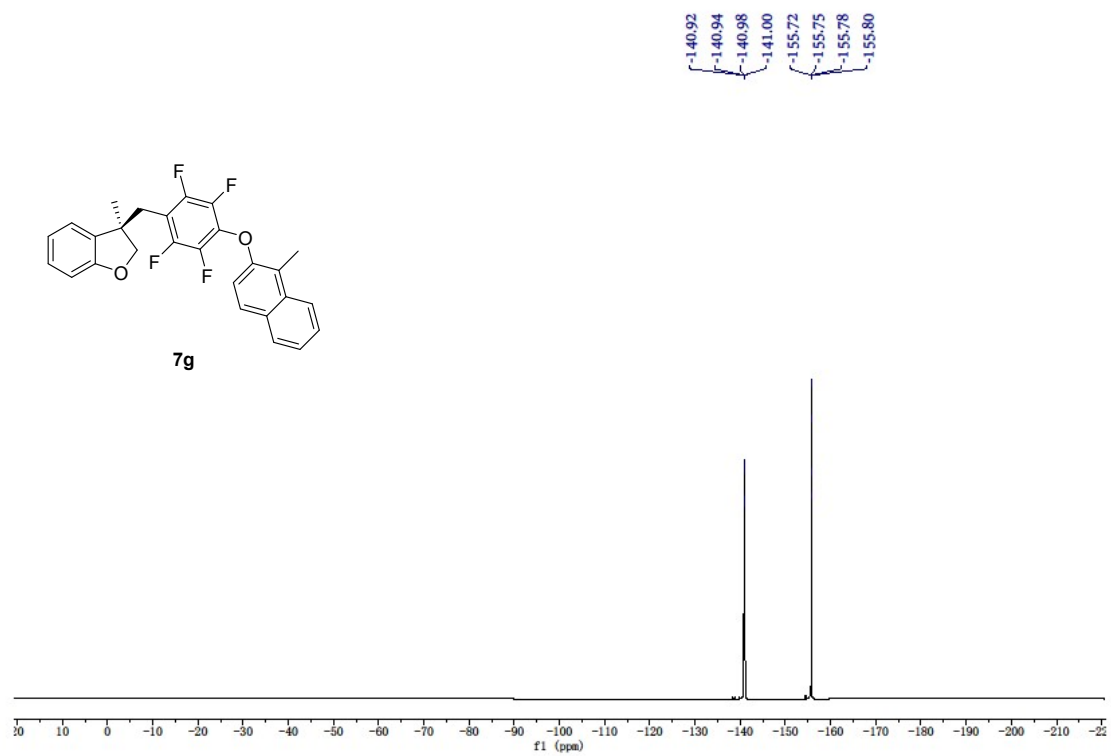

<Chromatogram>

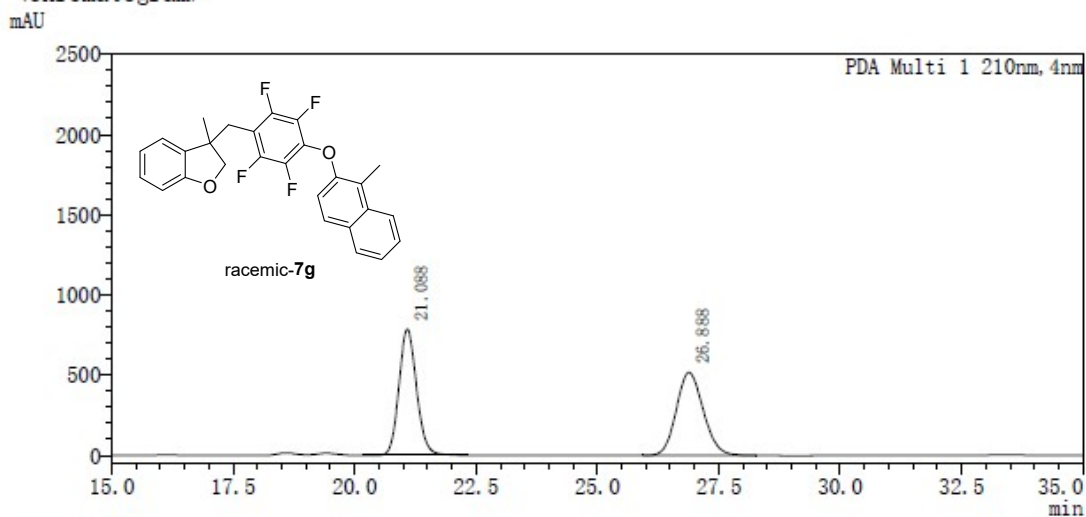

<Peak Table>

PDA Ch1 210nm

| No.   | Ret. Time (min) | Height  | Height% | Area     | Area%   |
|-------|-----------------|---------|---------|----------|---------|
| 1     | 21.088          | 786132  | 60.353  | 19839404 | 49.830  |
| 2     | 26.888          | 516430  | 39.647  | 19974385 | 50.170  |
| Total |                 | 1302561 | 100.000 | 39813789 | 100.000 |

<Chromatogram>

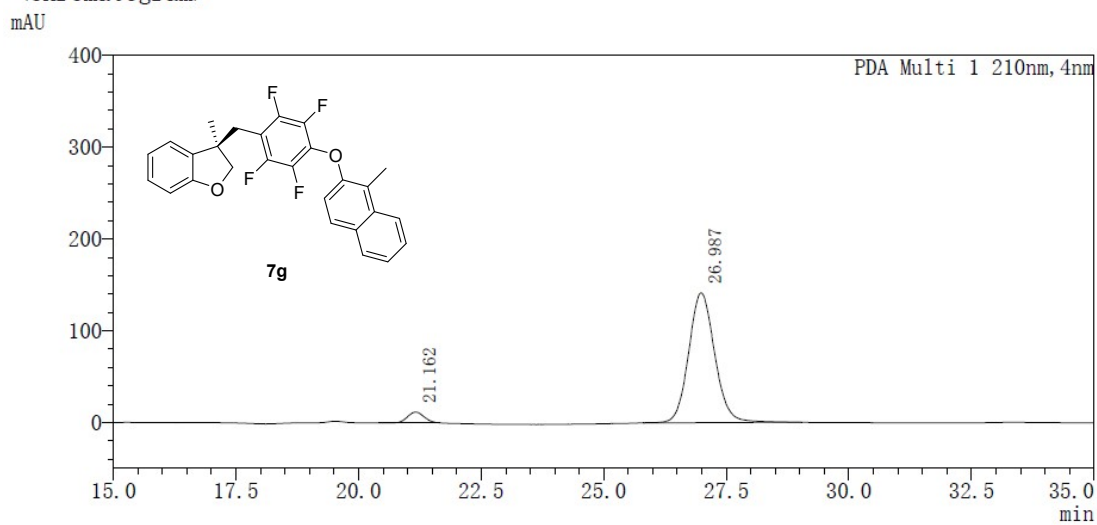

<Peak Table>

PDA Ch1 210nm

| No.   | Ret. Time (min) | Height | Height% | Area    | Area%   |
|-------|-----------------|--------|---------|---------|---------|
| 1     | 21.162          | 11869  | 7.743   | 281337  | 5.095   |
| 2     | 26.987          | 141412 | 92.257  | 5240612 | 94.905  |
| Total |                 | 153281 | 100.000 | 5521949 | 100.000 |

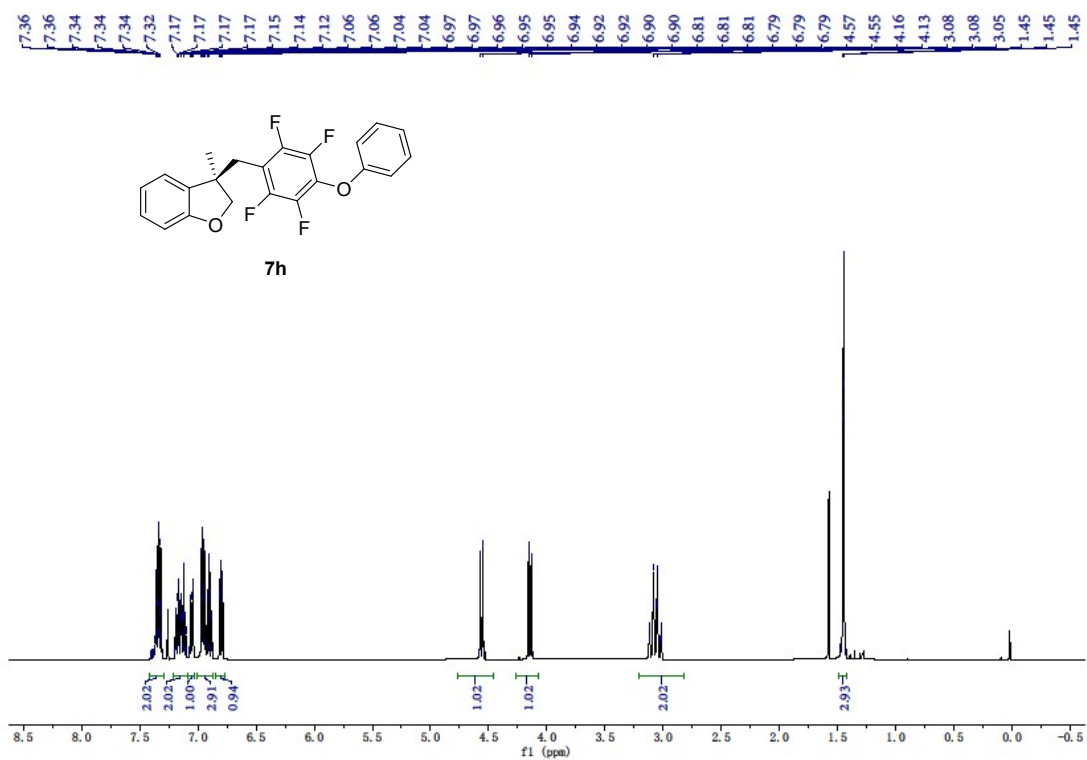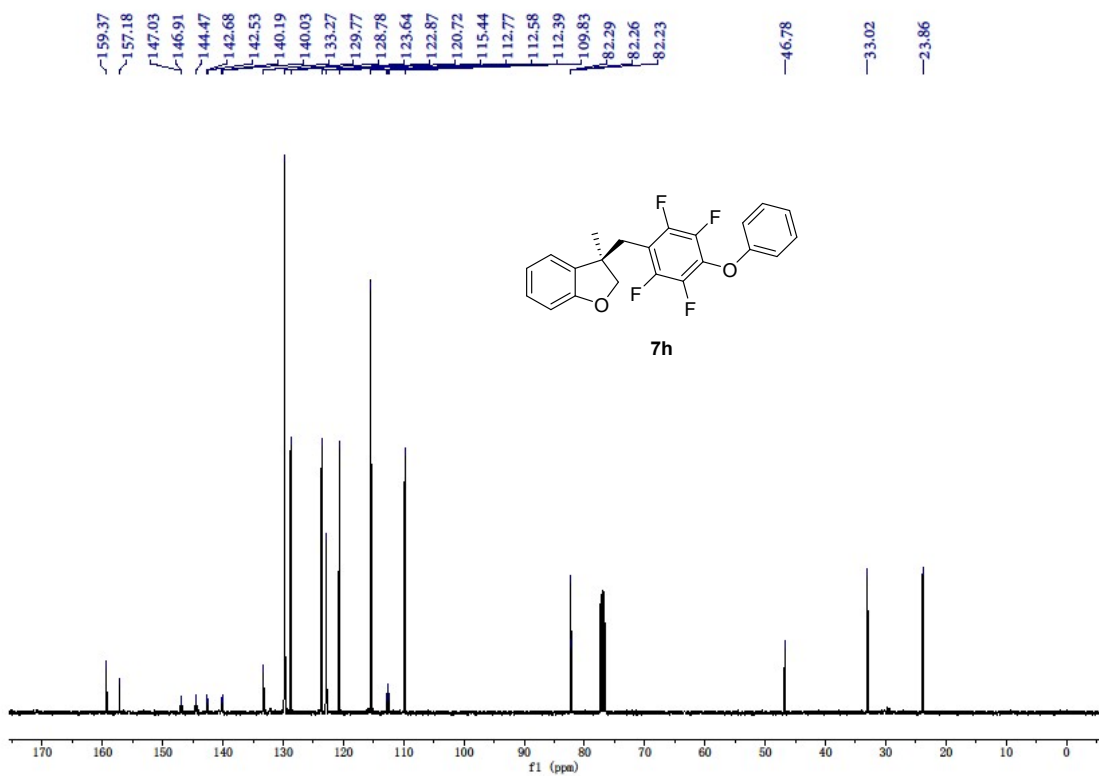

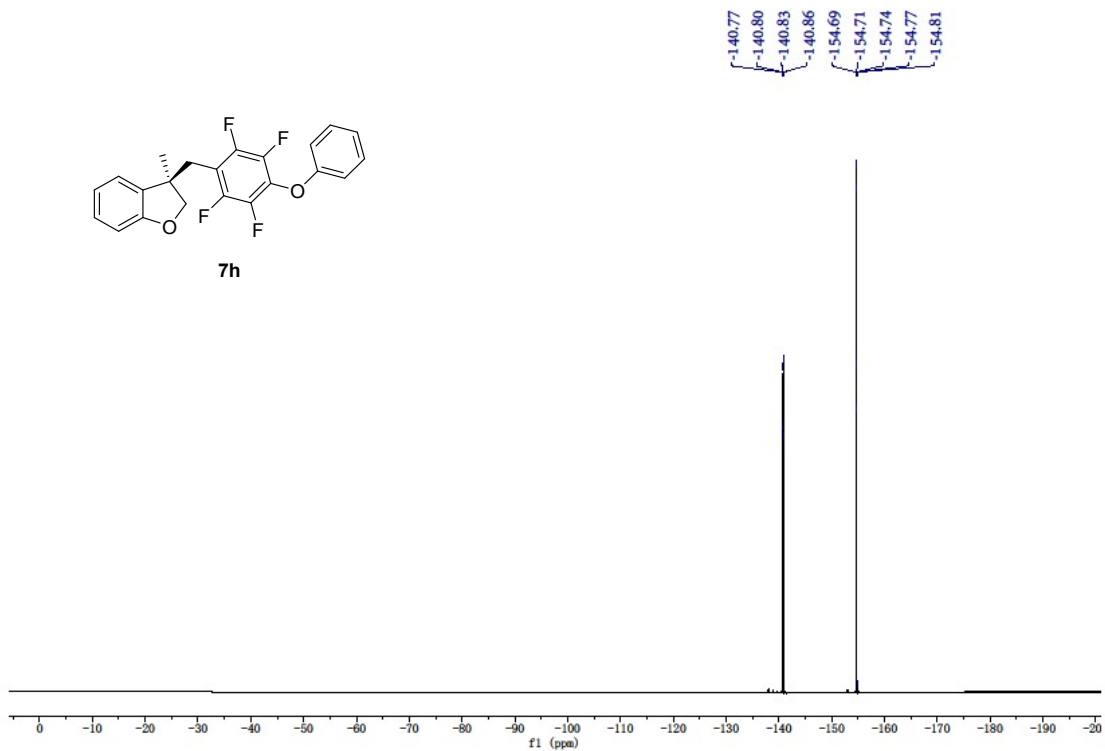

<Chromatogram>

mAU

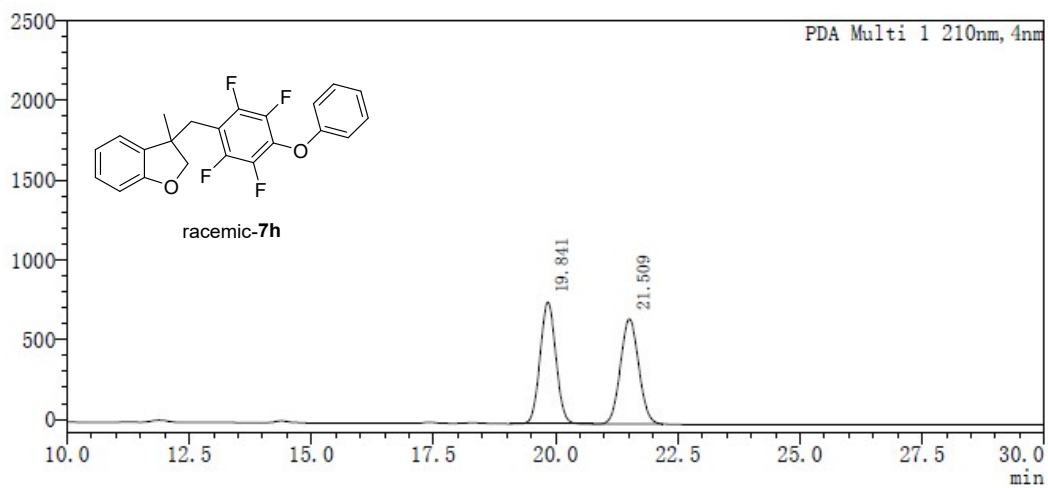

<Peak Table>

PDA Ch1 210nm

| No.   | Ret. Time (min) | Height  | Height% | Area     | Area%   |
|-------|-----------------|---------|---------|----------|---------|
| 1     | 19.841          | 762873  | 53.694  | 17218868 | 50.036  |
| 2     | 21.509          | 657895  | 46.306  | 17193771 | 49.964  |
| Total |                 | 1420768 | 100.000 | 34412639 | 100.000 |



<Chromatogram>

mAU

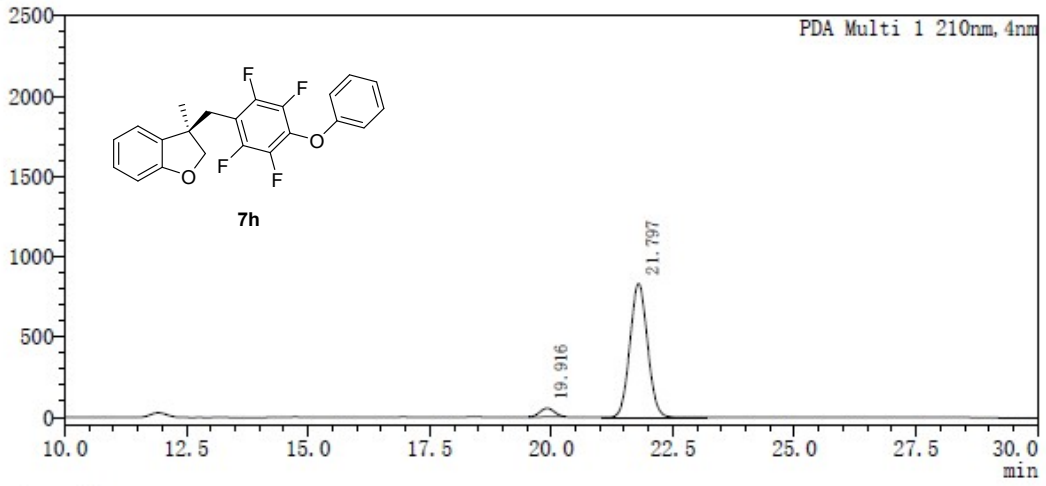

<Peak Table>

PDA Ch1 210nm

| No.   | Ret. Time (min) | Height | Height% | Area     | Area%   |
|-------|-----------------|--------|---------|----------|---------|
| 1     | 19.916          | 53794  | 6.073   | 1106647  | 5.006   |
| 2     | 21.797          | 831984 | 93.927  | 20999612 | 94.994  |
| Total |                 | 885778 | 100.000 | 22106258 | 100.000 |

7.17 7.17 7.17 7.15 7.14 7.14 7.13 7.12 7.12 7.06 7.06 7.04 7.04 6.92 6.92 6.90 6.90 6.88 6.88 6.87 6.86 6.85 6.85 6.81 6.81 6.81 6.79 6.79 6.79 6.57 4.55 4.16 4.13 3.08 3.08 3.07 3.05 3.05 2.33 1.45 1.45 1.44

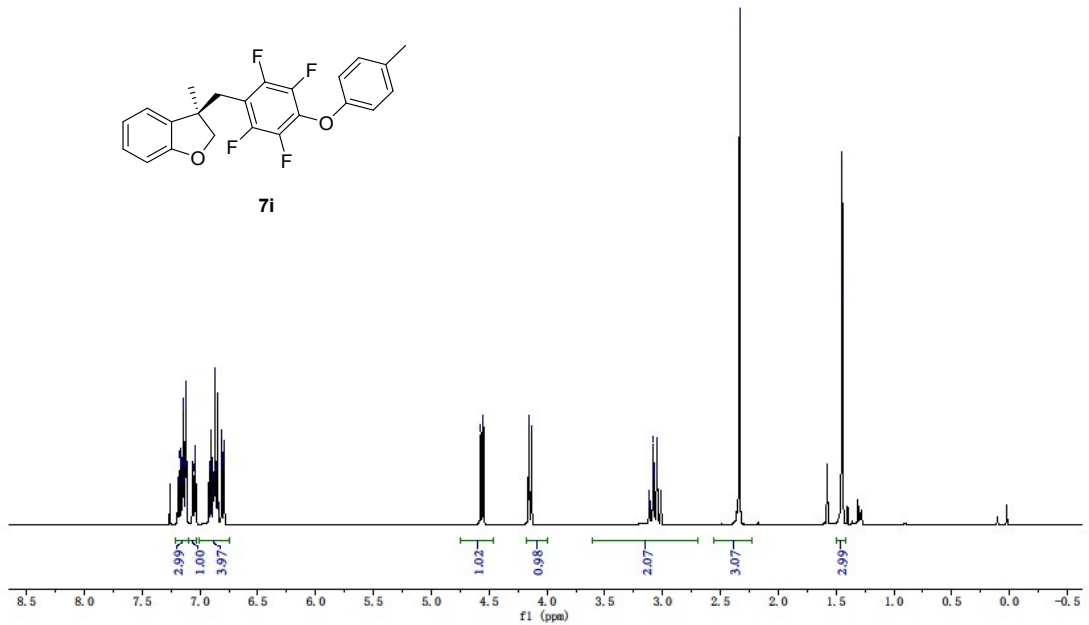

159.42  
 155.28  
 146.97  
 146.86  
 146.81  
 144.62  
 144.50  
 144.37  
 142.75  
 142.59  
 140.29  
 140.26  
 140.10  
 133.35  
 133.23  
 132.56  
 130.21  
 128.80  
 122.91  
 120.75  
 115.40  
 112.56  
 112.37  
 112.18  
 109.86  
 82.34  
 82.31  
 82.28  
 77.37  
 77.25  
 77.05  
 76.73  
 -46.82  
 -33.04  
 -23.90  
 -20.60

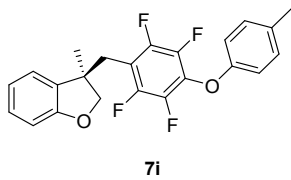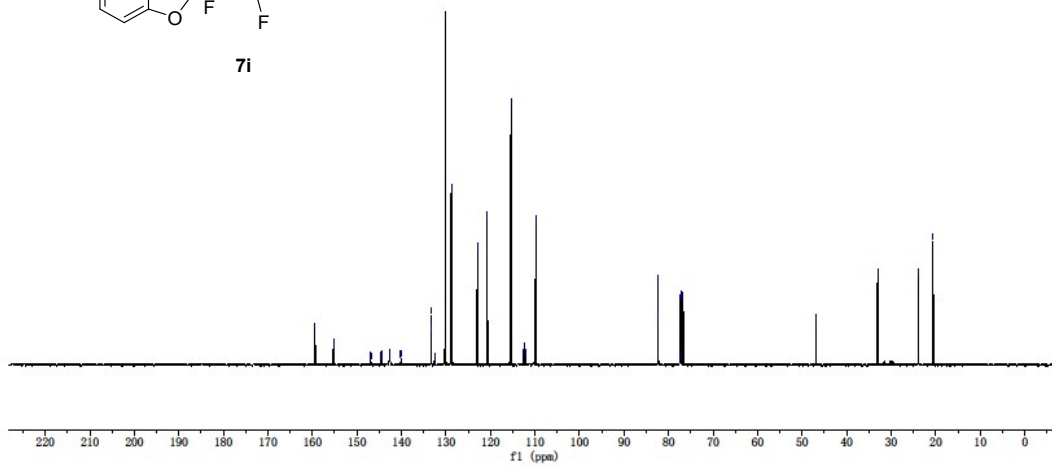

140.93  
 140.95  
 140.99  
 141.01  
 154.86  
 154.89  
 154.92  
 154.94

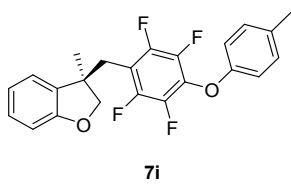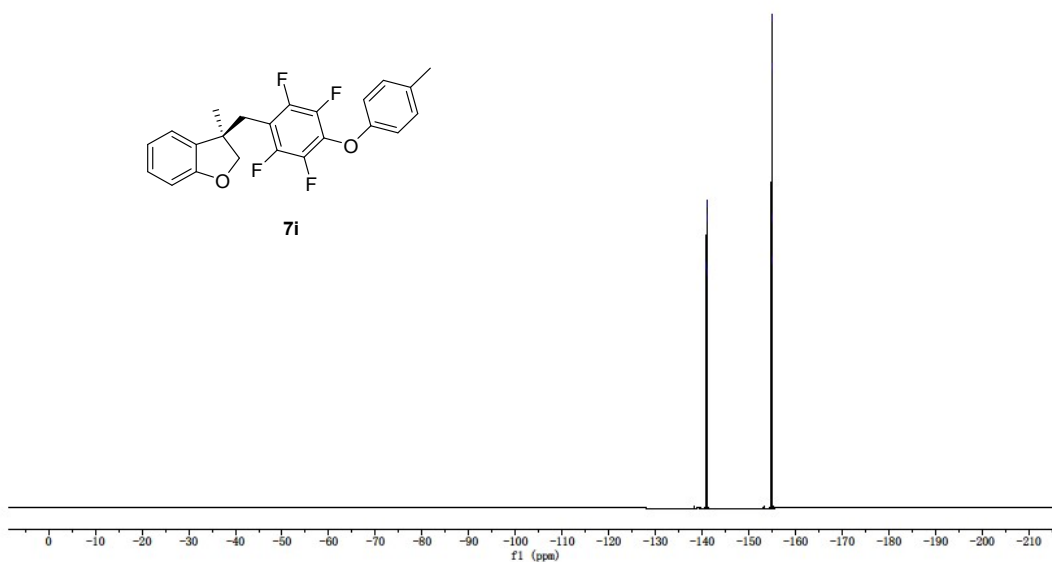

<Chromatogram>

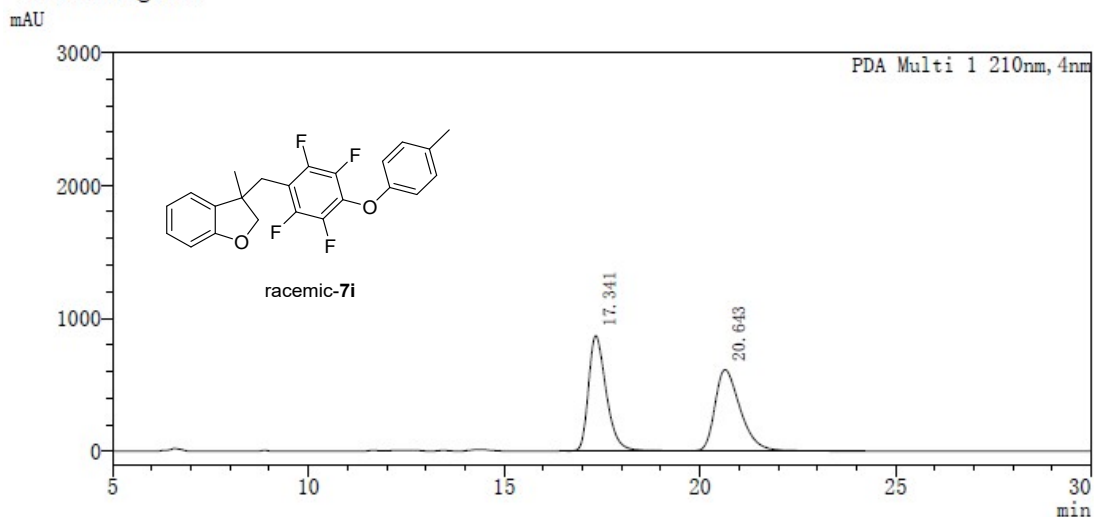

<Peak Table>

PDA Ch1 210nm

| No.   | Ret. Time(min) | Height  | Height% | Area     | Area%   |
|-------|----------------|---------|---------|----------|---------|
| 1     | 17.341         | 866840  | 58.627  | 27580992 | 49.911  |
| 2     | 20.643         | 611727  | 41.373  | 27679429 | 50.089  |
| Total |                | 1478567 | 100.000 | 55260421 | 100.000 |

<Chromatogram>

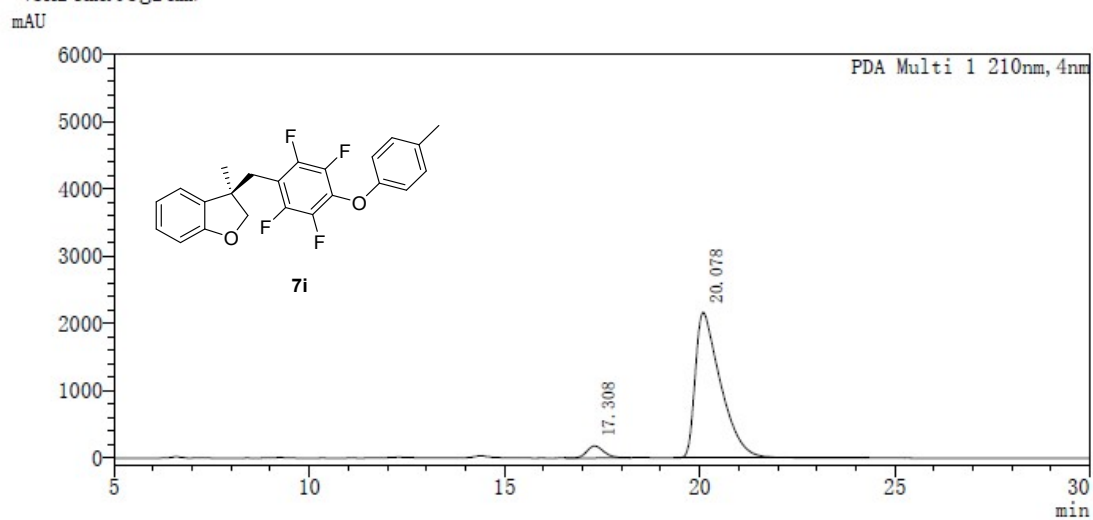

<Peak Table>

PDA Ch1 210nm

| No.   | Ret. Time(min) | Height  | Height% | Area      | Area%   |
|-------|----------------|---------|---------|-----------|---------|
| 1     | 17.308         | 178894  | 7.657   | 5542919   | 5.353   |
| 2     | 20.078         | 2157480 | 92.343  | 98004924  | 94.647  |
| Total |                | 2336374 | 100.000 | 103547843 | 100.000 |

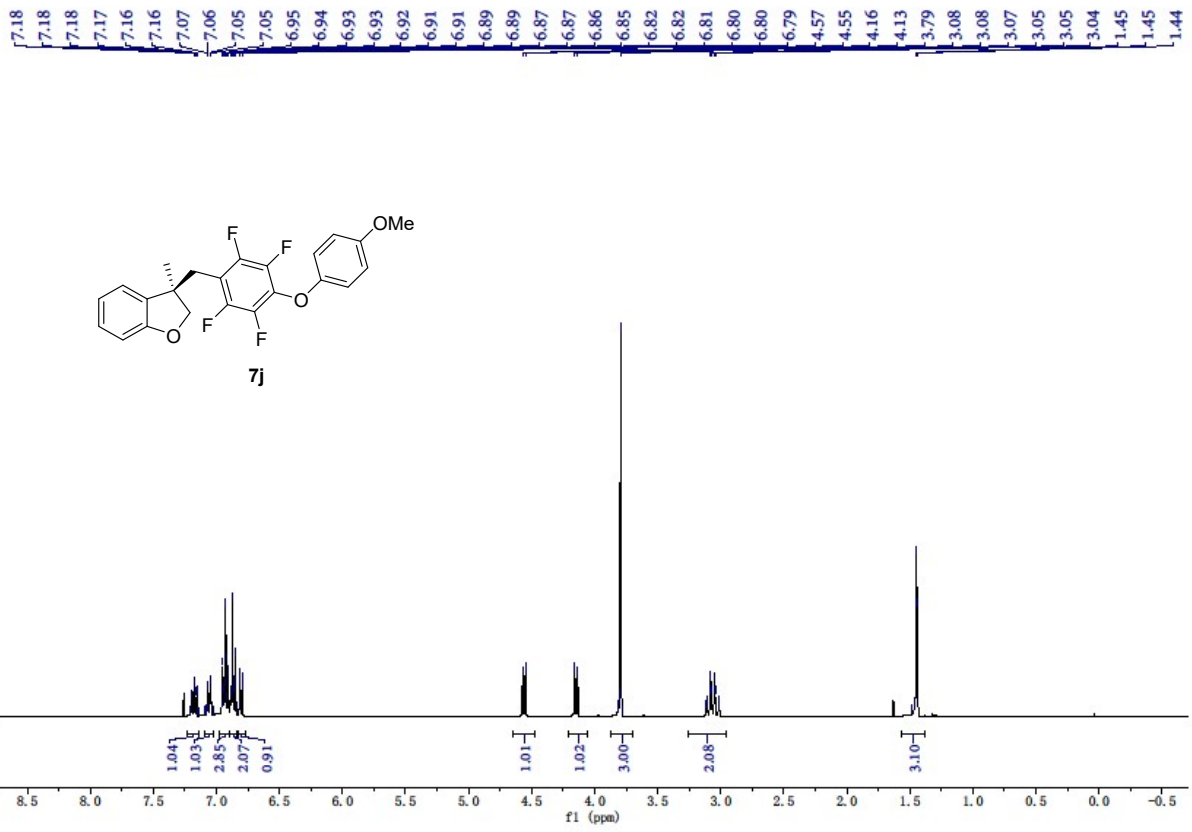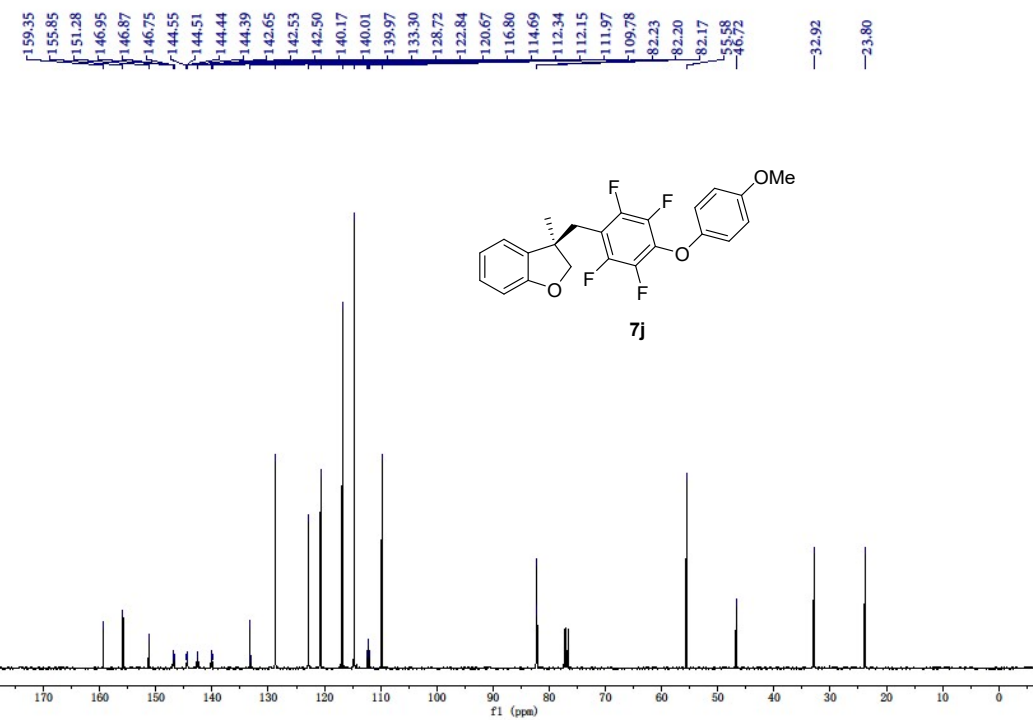

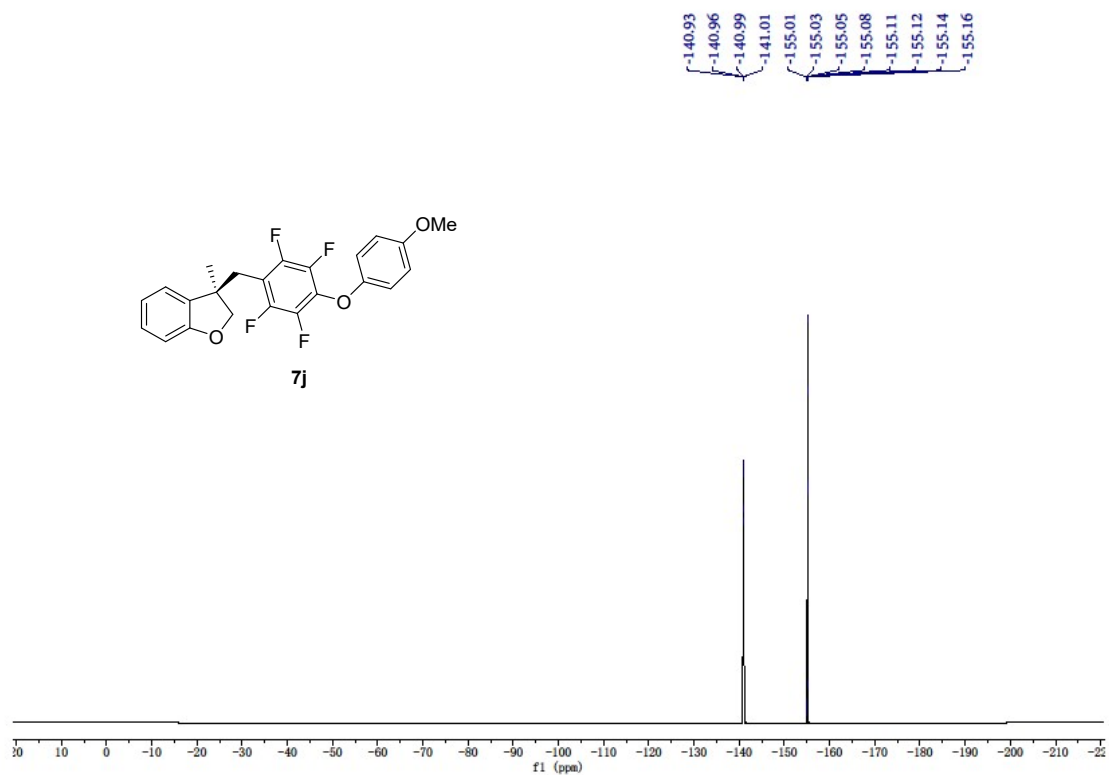

<Chromatogram>

mAU

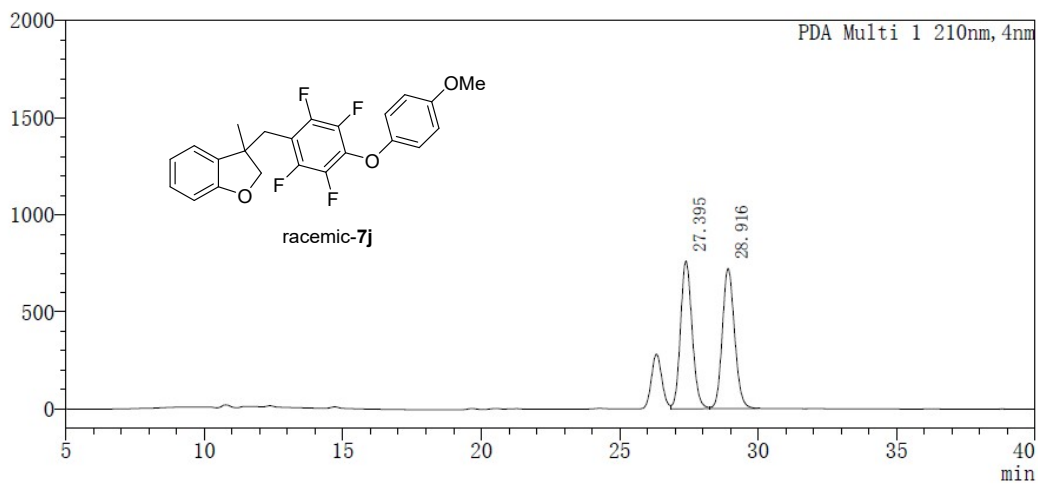

<Peak Table>

PDA Ch1 210nm

| No.   | Ret. Time (min) | Height  | Height% | Area     | Area%   |
|-------|-----------------|---------|---------|----------|---------|
| 1     | 27.395          | 760543  | 51.326  | 22207130 | 49.912  |
| 2     | 28.916          | 721254  | 48.674  | 22285139 | 50.088  |
| Total |                 | 1481797 | 100.000 | 44492269 | 100.000 |

<Chromatogram>

mAU

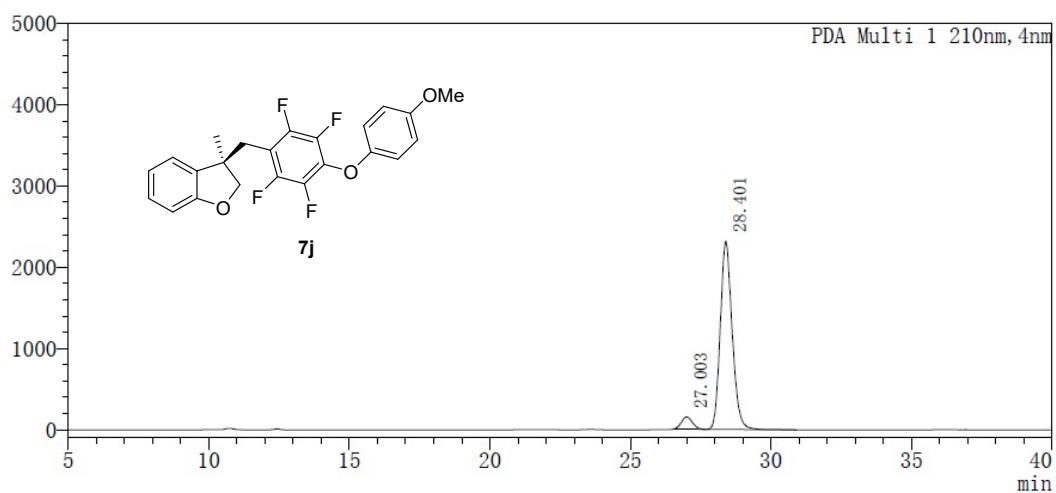

<Peak Table>

PDA Ch1 210nm

| No.   | Ret. Time (min) | Height  | Height% | Area     | Area%   |
|-------|-----------------|---------|---------|----------|---------|
| 1     | 27.003          | 150541  | 6.101   | 4081788  | 5.656   |
| 2     | 28.401          | 2316803 | 93.899  | 68088196 | 94.344  |
| Total |                 | 2467344 | 100.000 | 72169985 | 100.000 |

7.63 7.62 7.62 7.61 7.60 7.60 7.19 7.19 7.18 7.17 7.17 7.17 7.16 7.15 7.07 7.07 7.05 7.05 7.04 7.01 6.92 6.92 6.91 6.90 6.80 6.80 6.78 6.78 6.78 4.58 4.56 4.16 4.14 3.10 3.10 3.09 3.07 3.07 3.06 1.47 1.47 1.46

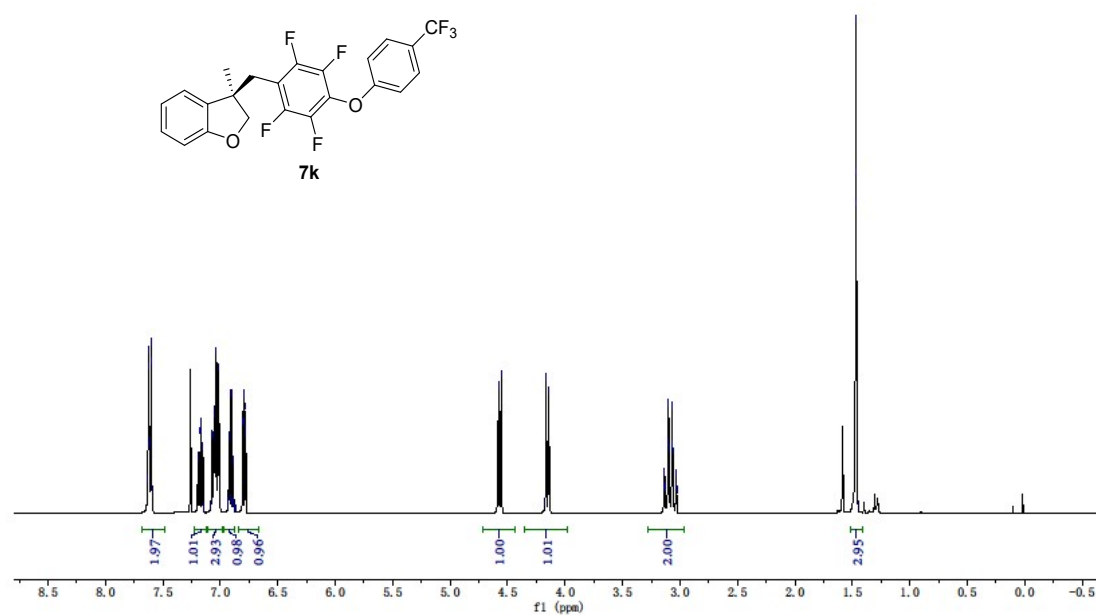

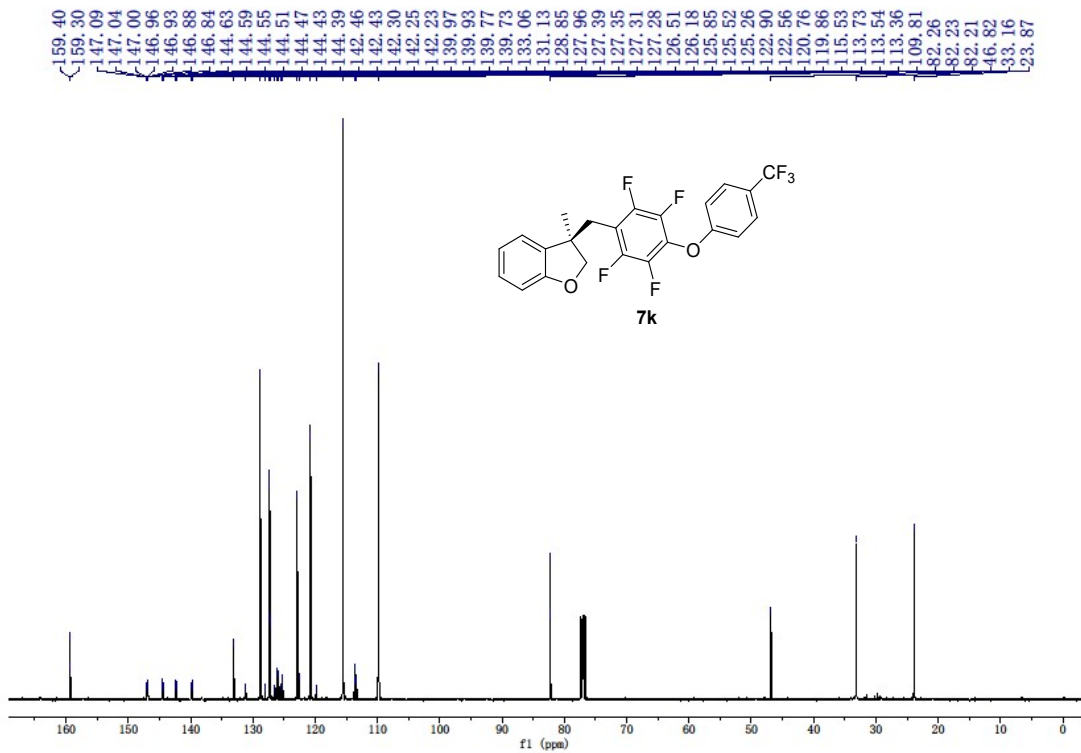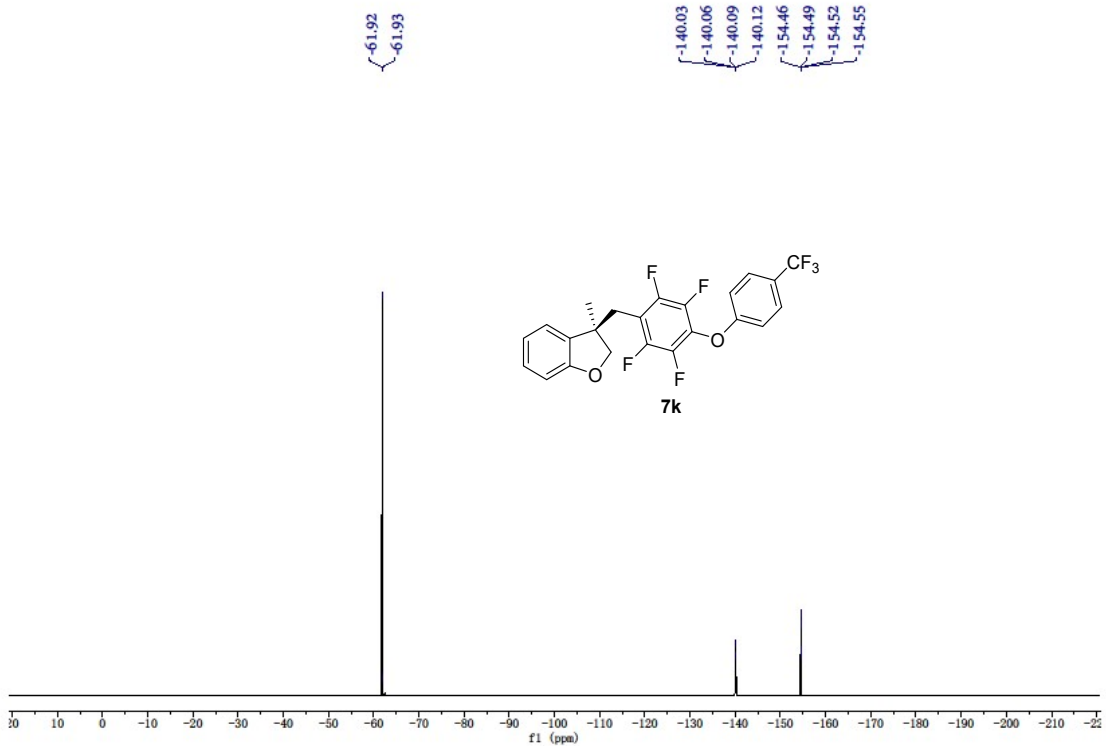

<Chromatogram>

mAU

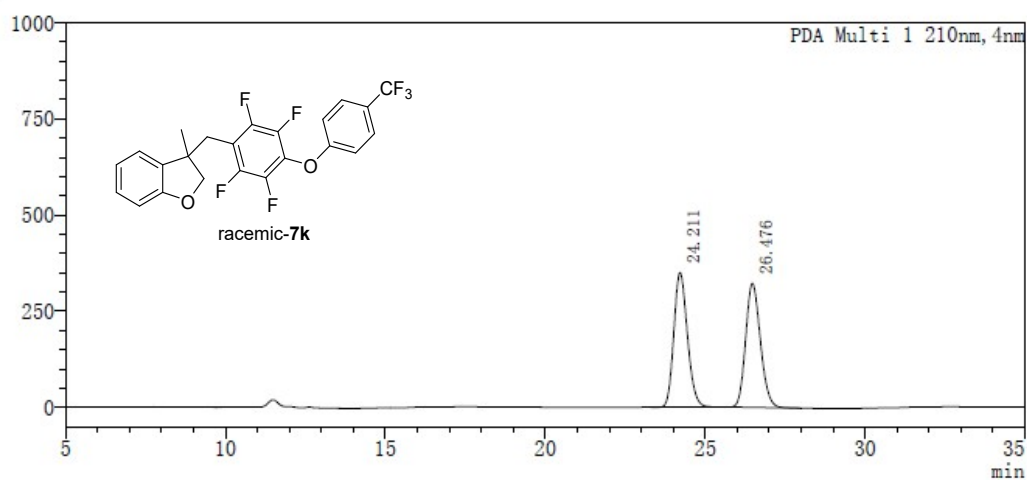

<Peak Table>

PDA Ch1 210nm

| No.   | Ret. Time (min) | Height | Height% | Area     | Area%   |
|-------|-----------------|--------|---------|----------|---------|
| 1     | 24.211          | 349514 | 52.006  | 10315712 | 49.914  |
| 2     | 26.476          | 322545 | 47.994  | 10351293 | 50.086  |
| Total |                 | 672060 | 100.000 | 20667004 | 100.000 |

<Chromatogram>

mAU

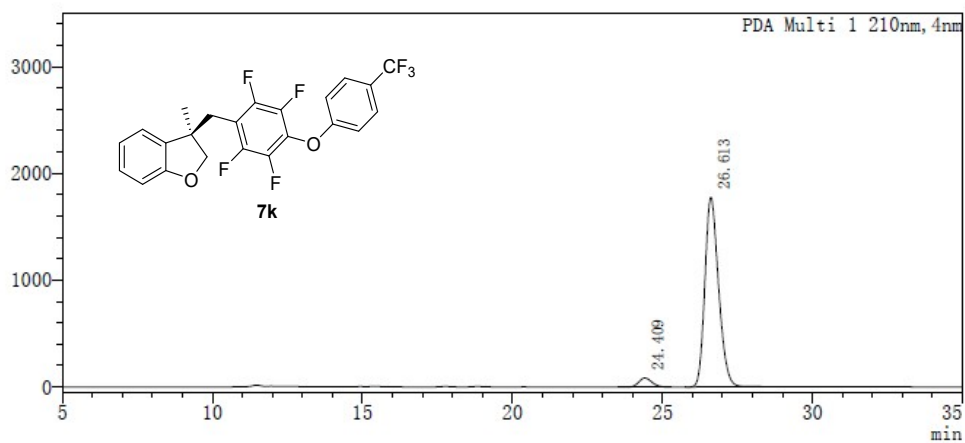

<Peak Table>

PDA Ch1 210nm

| No.   | Ret. Time (min) | Height  | Height% | Area     | Area%   |
|-------|-----------------|---------|---------|----------|---------|
| 1     | 24.409          | 84324   | 4.531   | 2499006  | 4.240   |
| 2     | 26.613          | 1776731 | 95.469  | 56440430 | 95.760  |
| Total |                 | 1861055 | 100.000 | 58939436 | 100.000 |



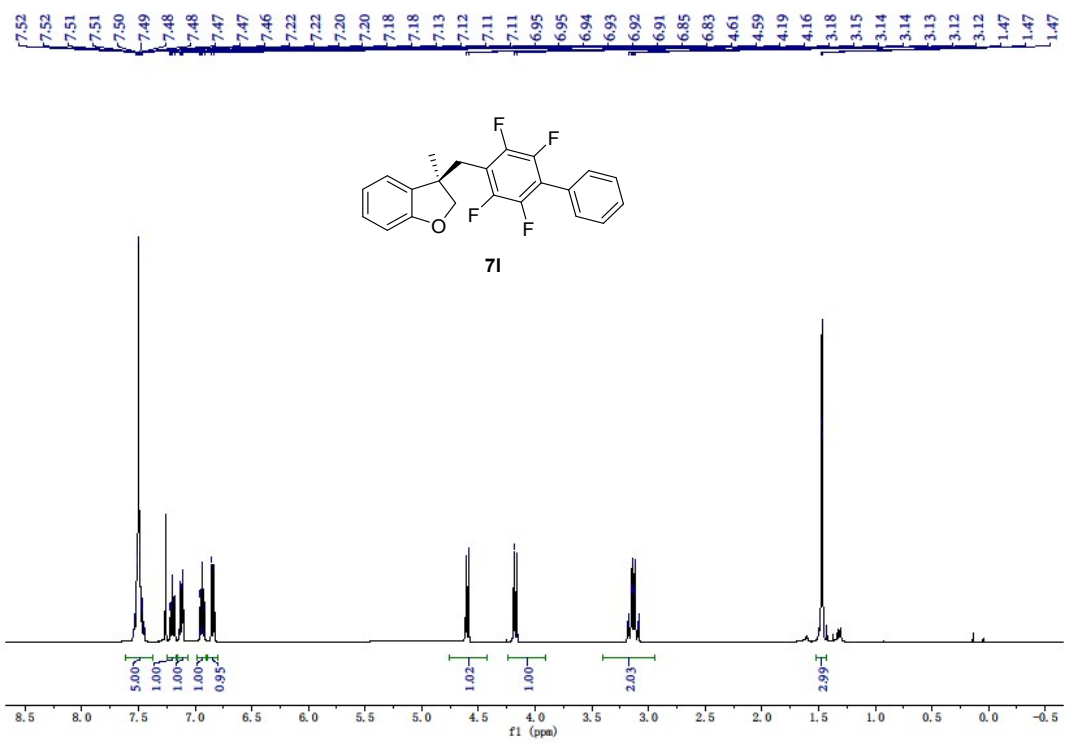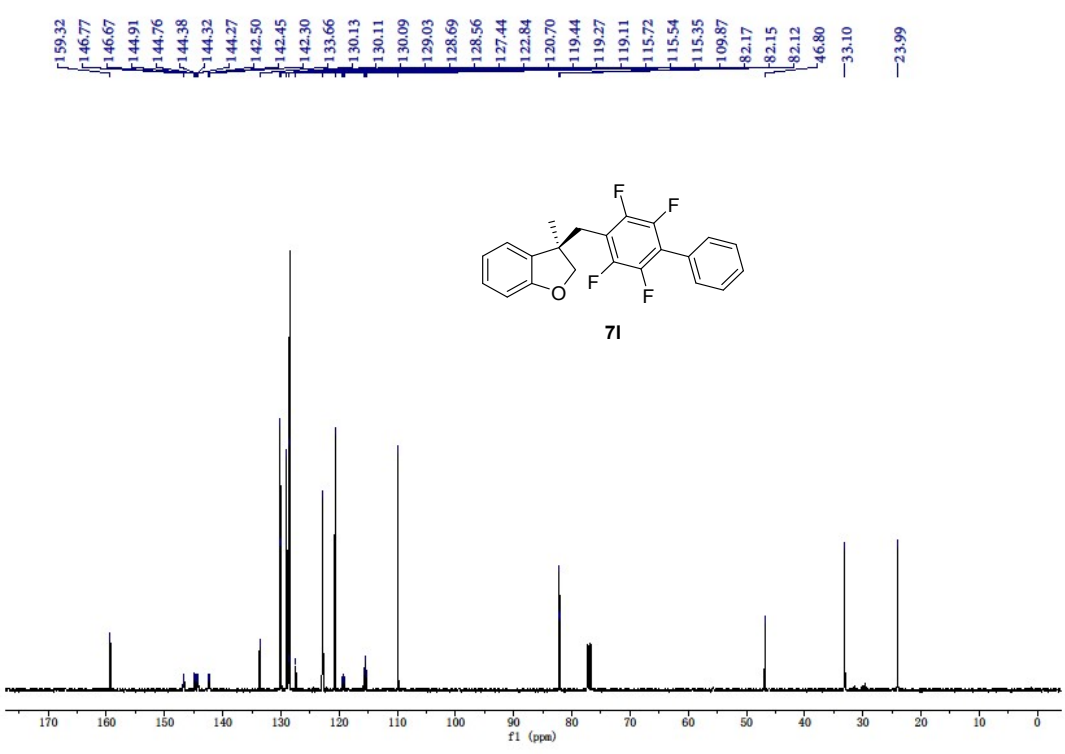

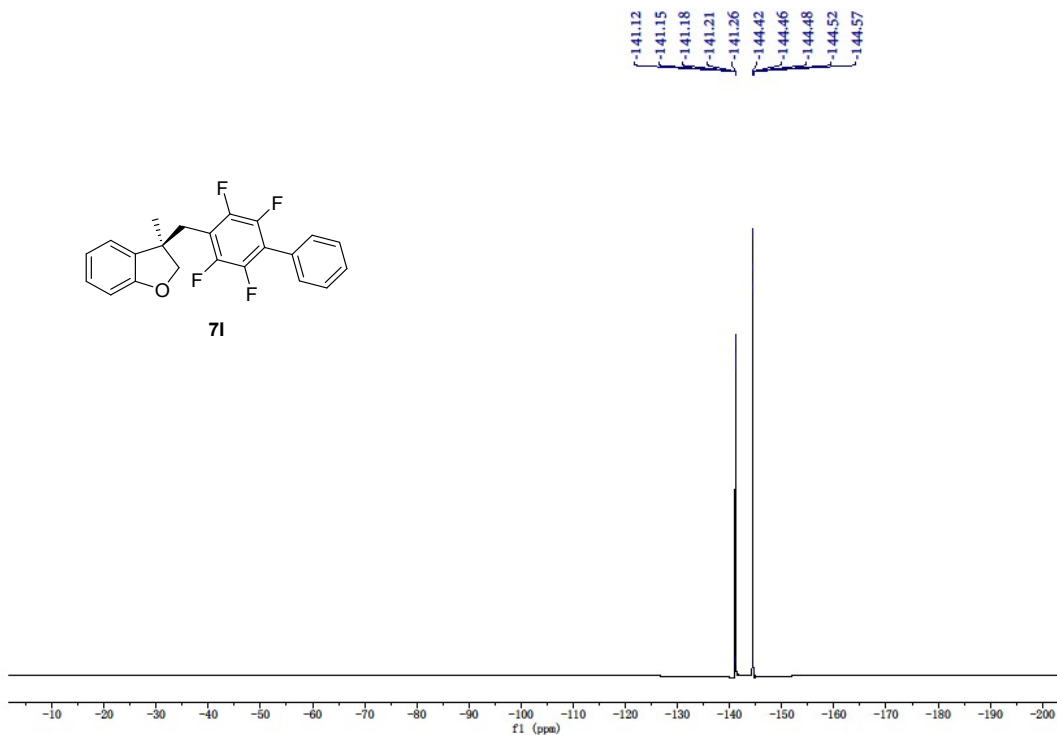

<Chromatogram>

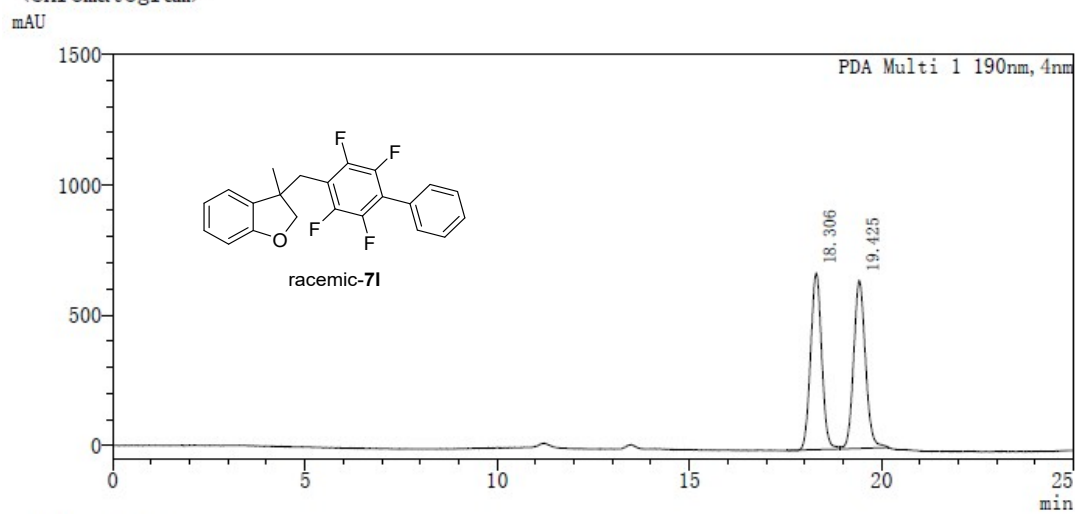

<Peak Table>

PDA Ch1 190nm

| No.   | Ret. Time (min) | Height  | Height% | Area     | Area%   |
|-------|-----------------|---------|---------|----------|---------|
| 1     | 18.306          | 675724  | 51.200  | 13566758 | 49.673  |
| 2     | 19.425          | 644051  | 48.800  | 13745373 | 50.327  |
| Total |                 | 1319774 | 100.000 | 27312131 | 100.000 |

<Chromatogram>

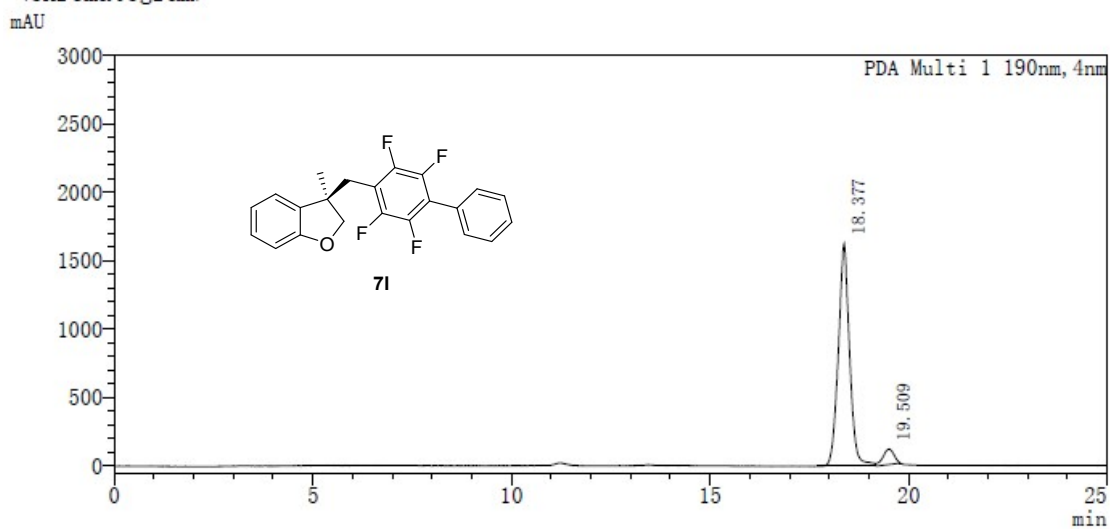

<Peak Table>

PDA Ch1 190nm

| No.   | Ret. Time (min) | Height  | Height% | Area     | Area%   |
|-------|-----------------|---------|---------|----------|---------|
| 1     | 18.377          | 1627633 | 93.526  | 31996404 | 93.628  |
| 2     | 19.509          | 112664  | 6.474   | 2177743  | 6.372   |
| Total |                 | 1740297 | 100.000 | 34174147 | 100.000 |

7.31 7.31 7.31 7.29 7.29 7.29 7.27 7.27 7.27 7.26 7.26 7.25 7.25 7.25 7.24 7.16 7.16 7.16 7.16 7.16 7.05 7.05 7.05 7.03 7.03 6.91 6.90 6.89 6.89 6.89 6.80 6.80 6.80 6.78 6.78 6.78 6.78 4.53 4.51 4.11 4.11 4.09 4.09 4.05 4.05 4.05 4.04 4.04 3.04 3.04 3.02 3.02 1.39 1.39 1.39

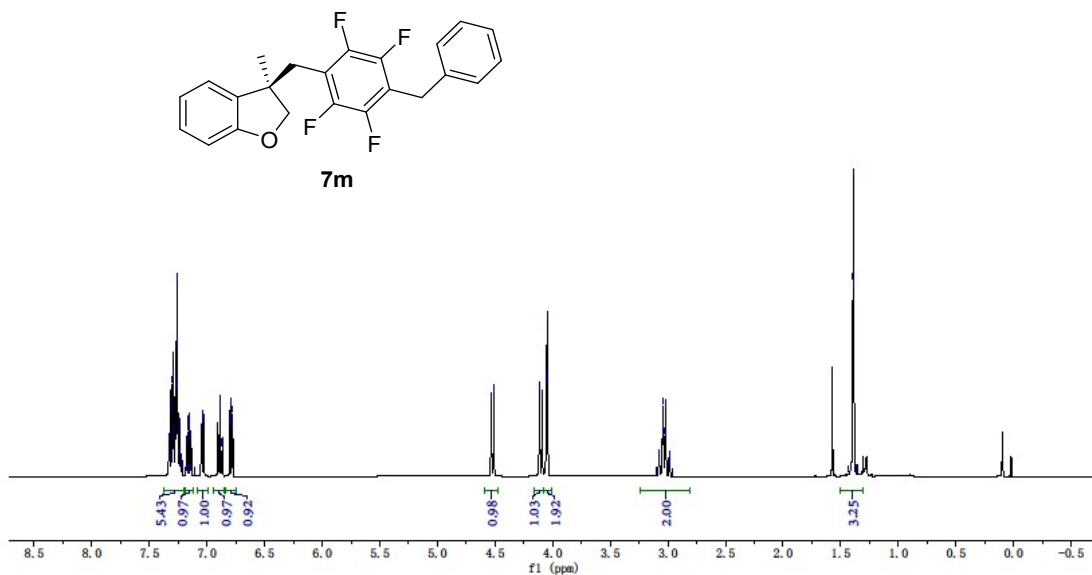

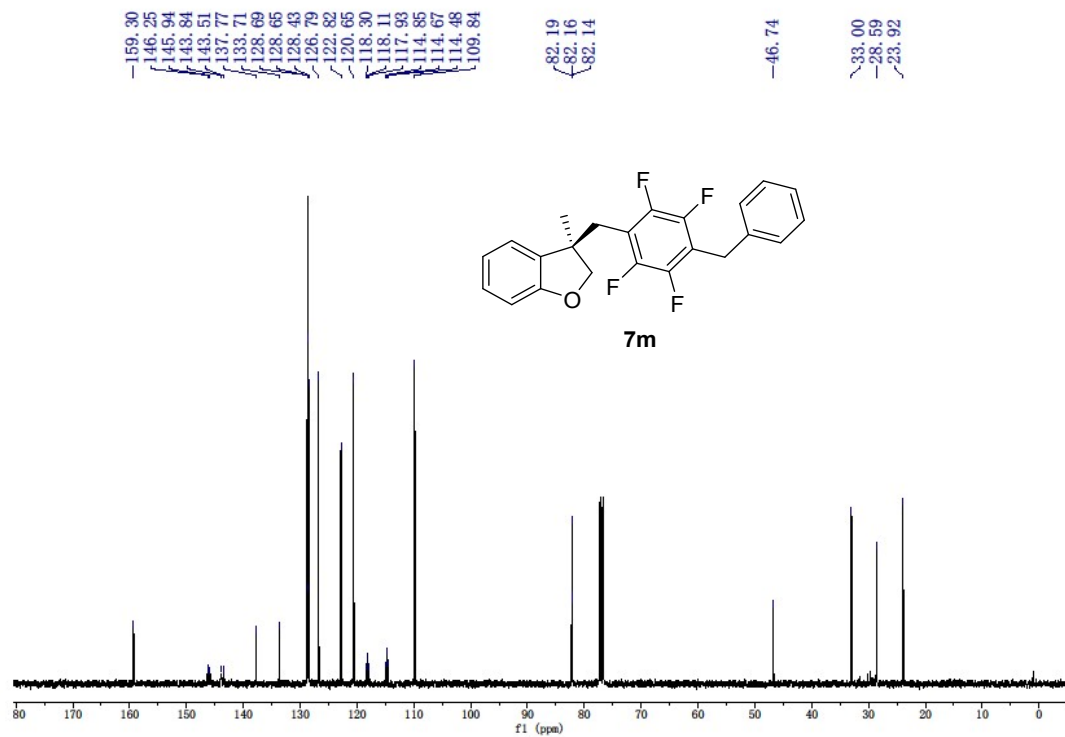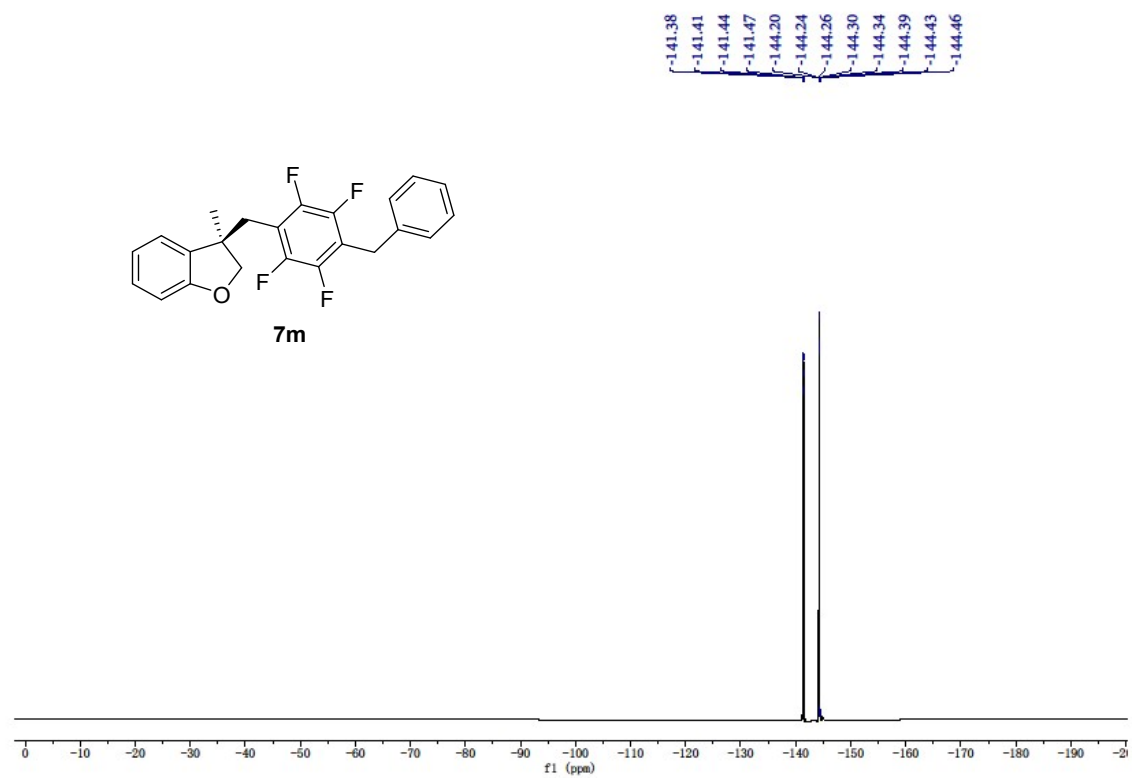

<Chromatogram>

mAU

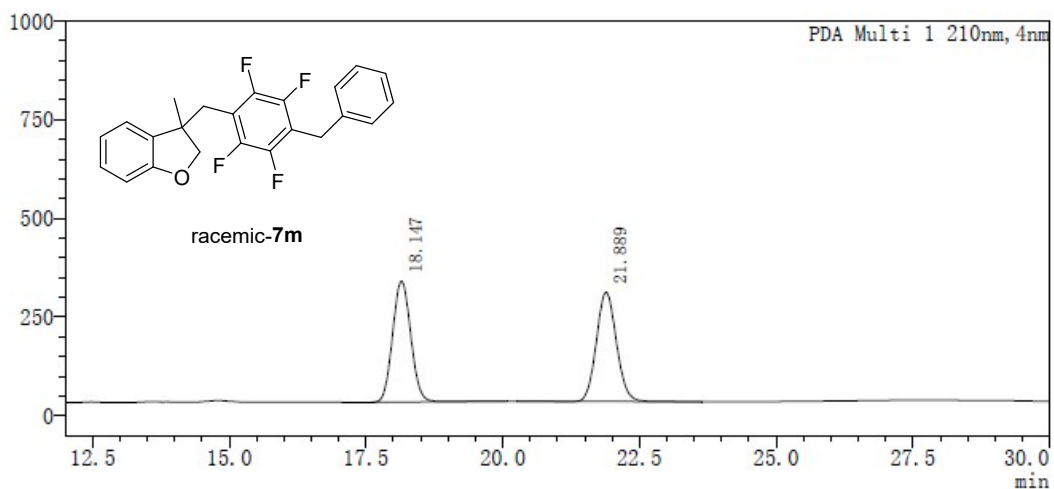

<Peak Table>

PDA Ch1 210nm

| No.   | Ret. Time (min) | Height | Height% | Area     | Area%   |
|-------|-----------------|--------|---------|----------|---------|
| 1     | 18.147          | 306262 | 52.515  | 7081566  | 50.220  |
| 2     | 21.889          | 276929 | 47.485  | 7019657  | 49.780  |
| Total |                 | 583191 | 100.000 | 14101223 | 100.000 |

<Chromatogram>

mAU

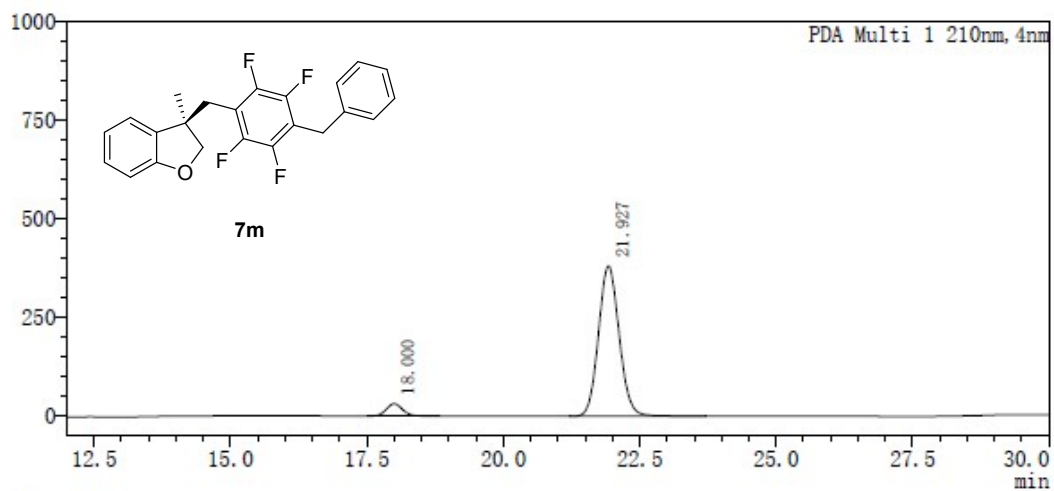

<Peak Table>

PDA Ch1 210nm

| No.   | Ret. Time (min) | Height | Height% | Area     | Area%   |
|-------|-----------------|--------|---------|----------|---------|
| 1     | 18.000          | 31304  | 7.579   | 649078   | 6.043   |
| 2     | 21.927          | 381746 | 92.421  | 10091898 | 93.957  |
| Total |                 | 413051 | 100.000 | 10740976 | 100.000 |

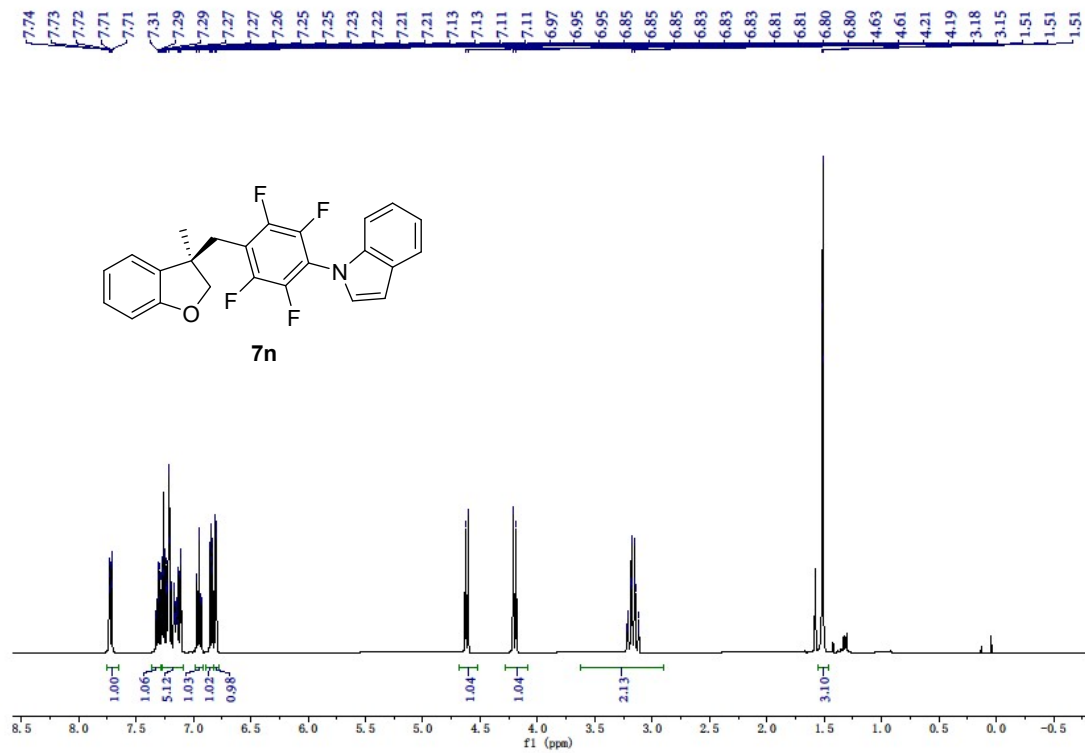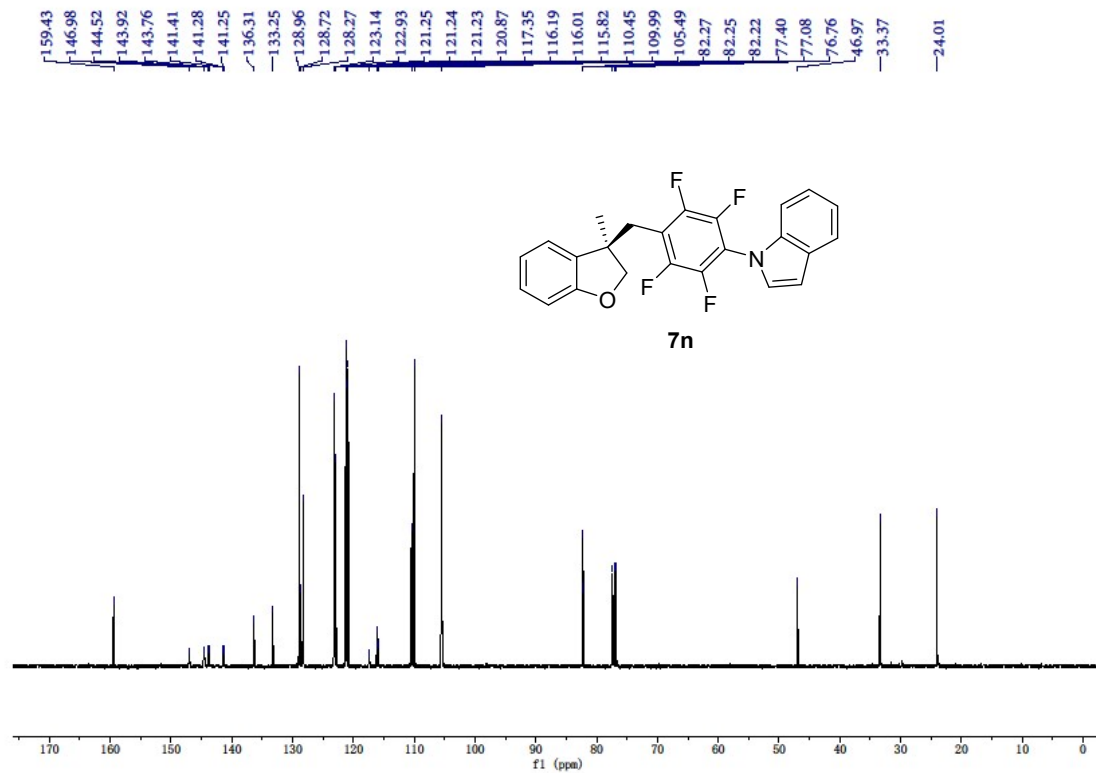

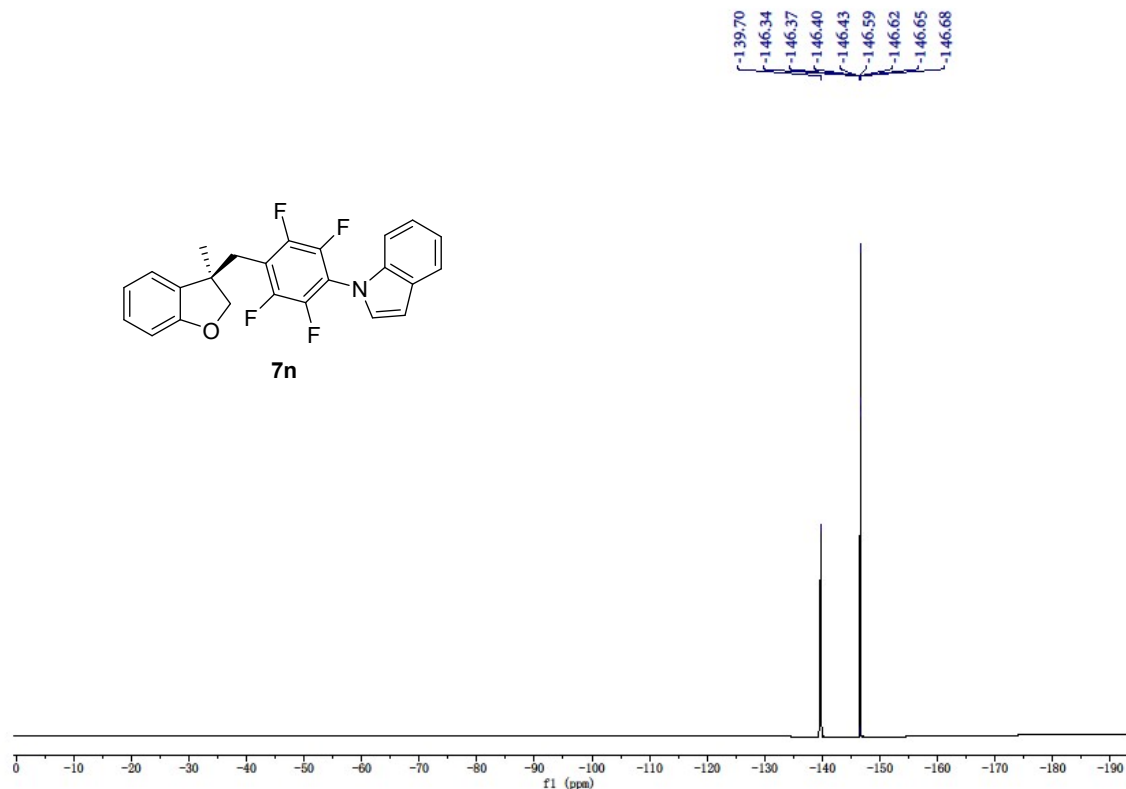

<Chromatogram>

mAU

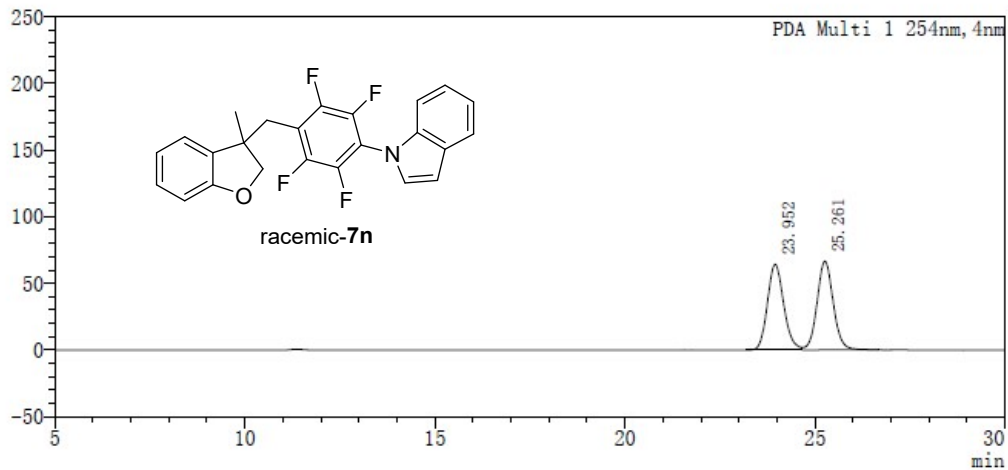

<Peak Table>

PDA Ch1 254nm

| No.   | Ret. Time (min) | Height | Height% | Area    | Area%   |
|-------|-----------------|--------|---------|---------|---------|
| 1     | 23.952          | 64254  | 49.093  | 1921184 | 49.350  |
| 2     | 25.261          | 66629  | 50.907  | 1971763 | 50.650  |
| Total |                 | 130883 | 100.000 | 3892946 | 100.000 |

<Chromatogram>

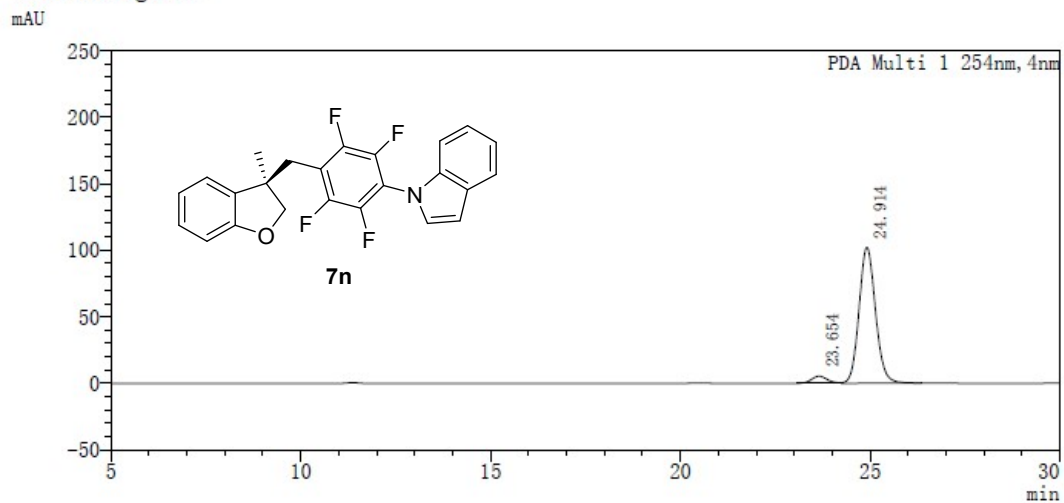

<Peak Table>

PDA Ch1 254nm

| No.   | Ret. Time (min) | Height | Height% | Area    | Area%   |
|-------|-----------------|--------|---------|---------|---------|
| 1     | 23.654          | 5327   | 4.960   | 152929  | 4.731   |
| 2     | 24.914          | 102071 | 95.040  | 3079232 | 95.269  |
| Total |                 | 107397 | 100.000 | 3232161 | 100.000 |

7.19  
7.18  
7.17  
7.16  
7.15  
7.14  
7.13  
7.08  
7.06  
7.04  
7.02  
7.00  
6.99  
6.98  
6.92  
6.90  
6.88  
6.86  
6.81  
6.81  
6.80  
6.79  
6.78  
6.77  
6.76  
6.75  
6.56  
4.54  
4.13  
4.12  
4.10  
3.09  
3.09  
3.08  
3.06  
3.05  
3.05  
3.03  
3.02  
3.02  
3.00  
2.99  
2.98  
1.39

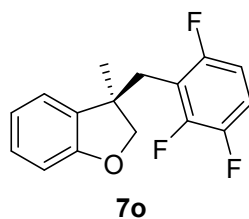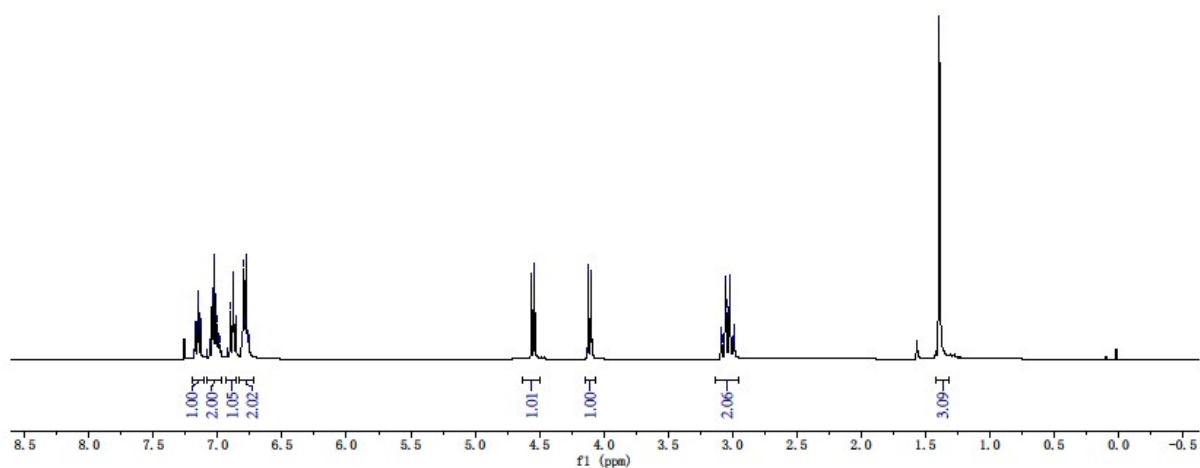



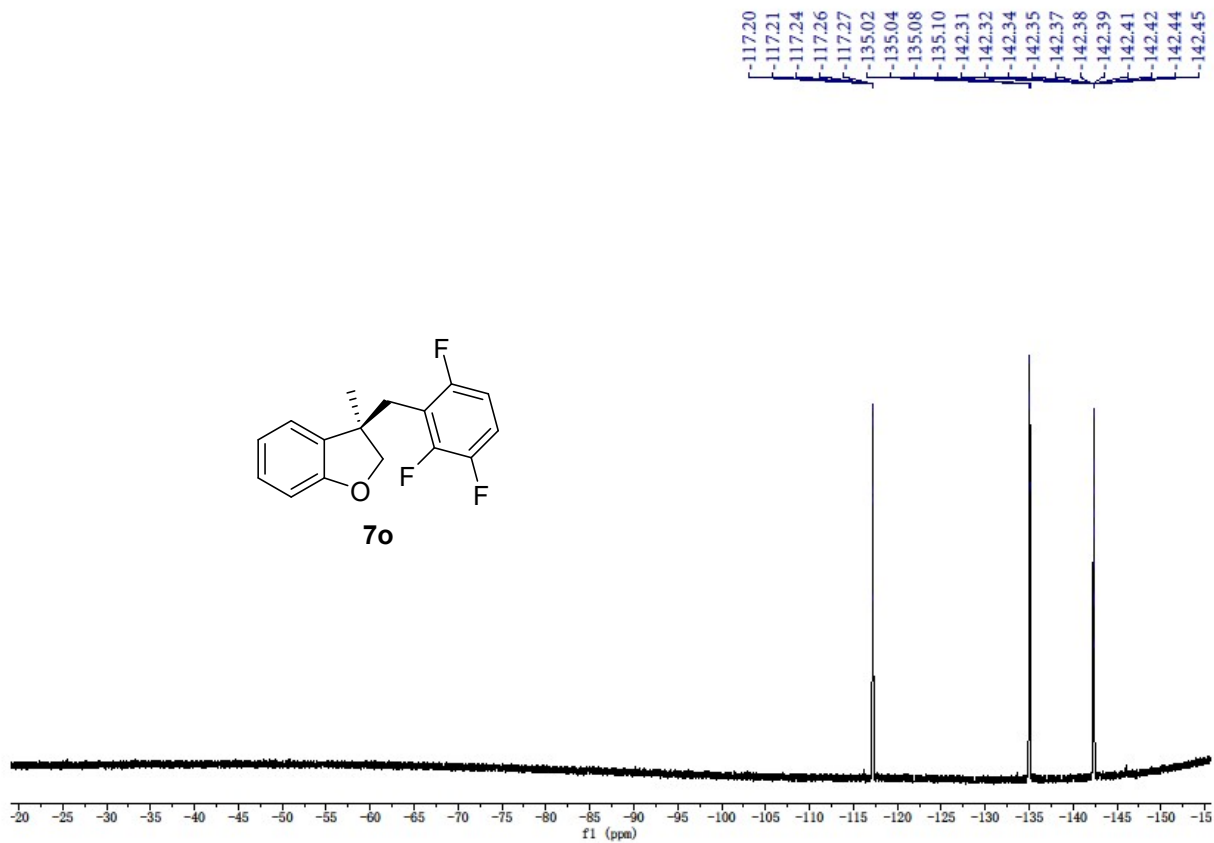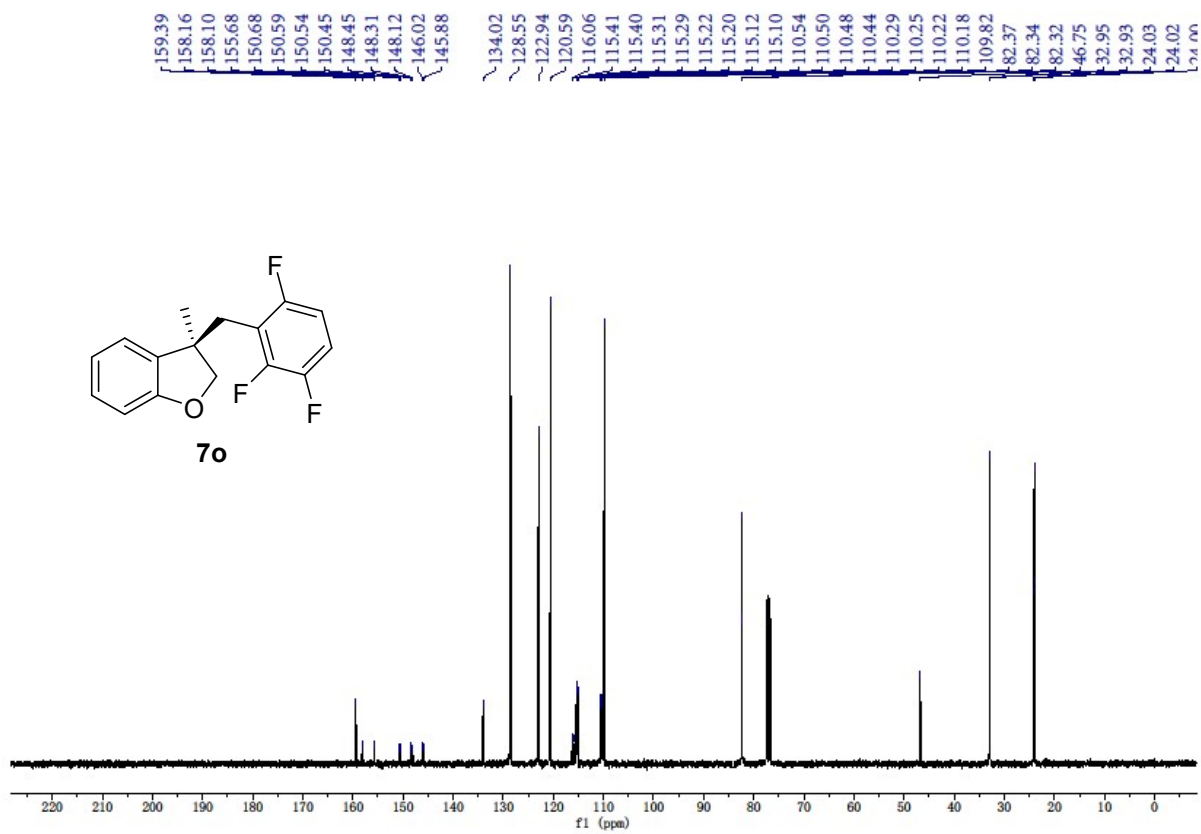

<Chromatogram>

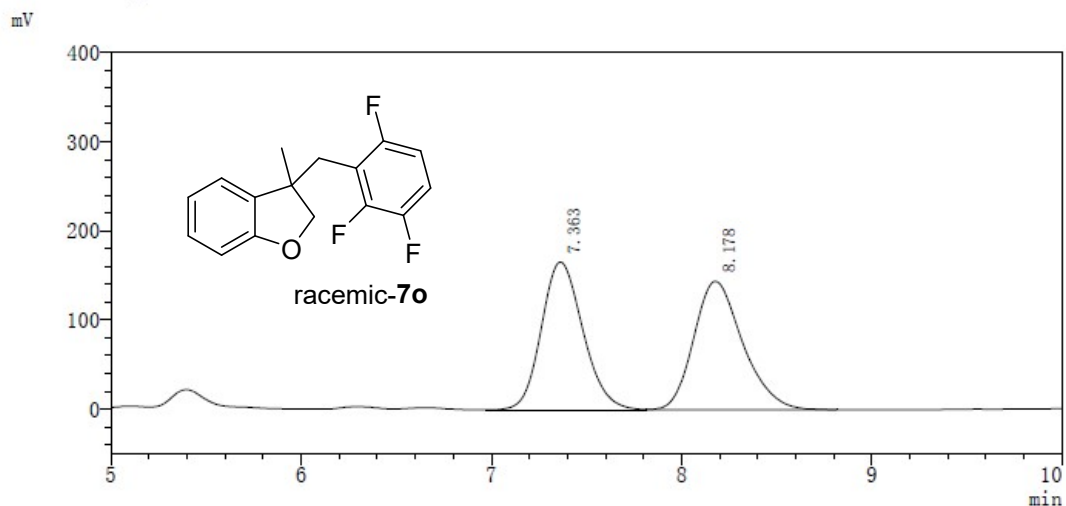

<Peak Table>

检测器A Ch2 210nm

| No.   | Ret. Time (min) | Height | Height% | Area    | Area%   |
|-------|-----------------|--------|---------|---------|---------|
| 1     | 7.363           | 165694 | 53.493  | 2522916 | 49.450  |
| 2     | 8.178           | 144053 | 46.507  | 2579075 | 50.550  |
| Total |                 | 309747 | 100.000 | 5101991 | 100.000 |

<Chromatogram>

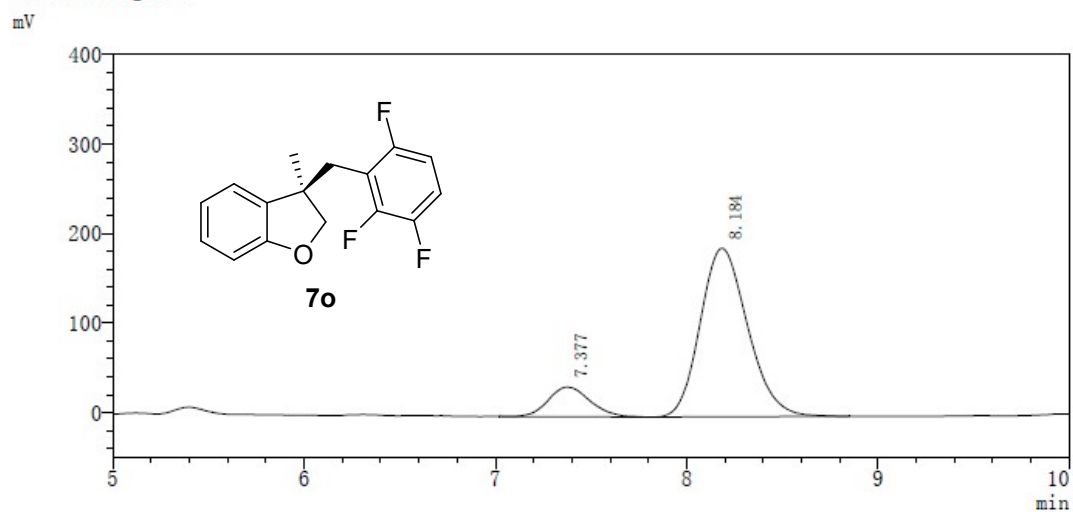

<Peak Table>

检测器A Ch2 210nm

| No.   | Ret. Time (min) | Height | Height% | Area    | Area%   |
|-------|-----------------|--------|---------|---------|---------|
| 1     | 7.377           | 33122  | 14.965  | 507079  | 13.516  |
| 2     | 8.184           | 188206 | 85.035  | 3244711 | 86.484  |
| Total |                 | 221328 | 100.000 | 3751790 | 100.000 |

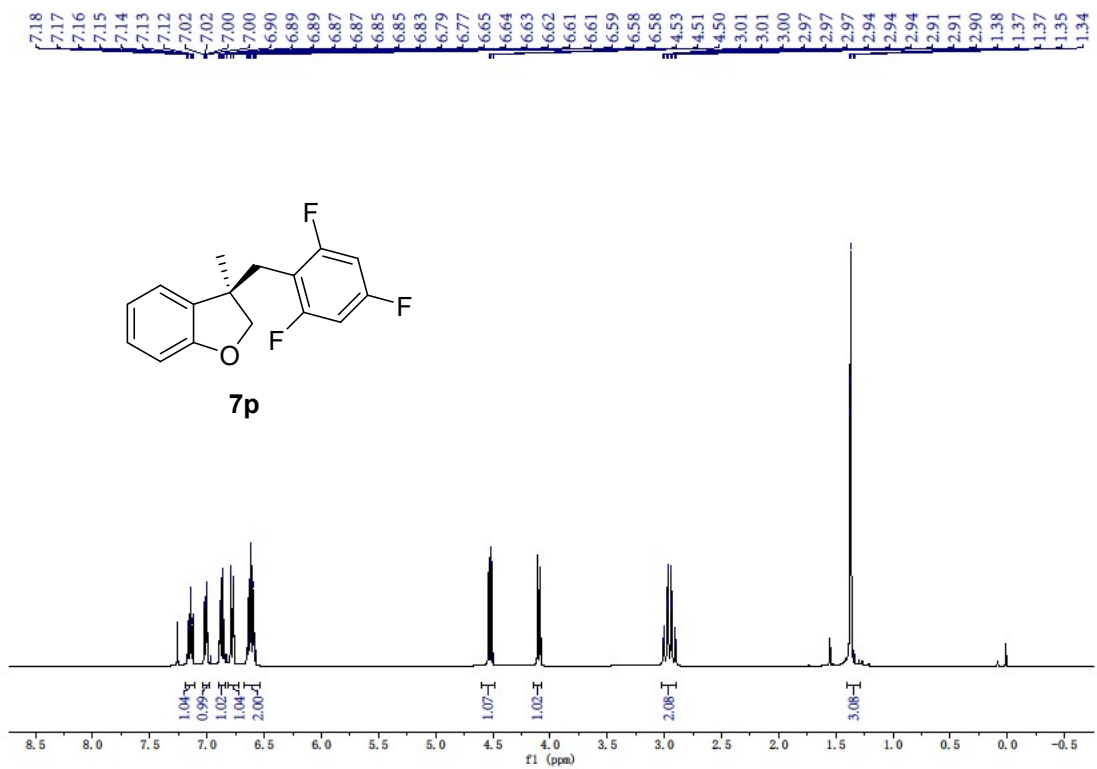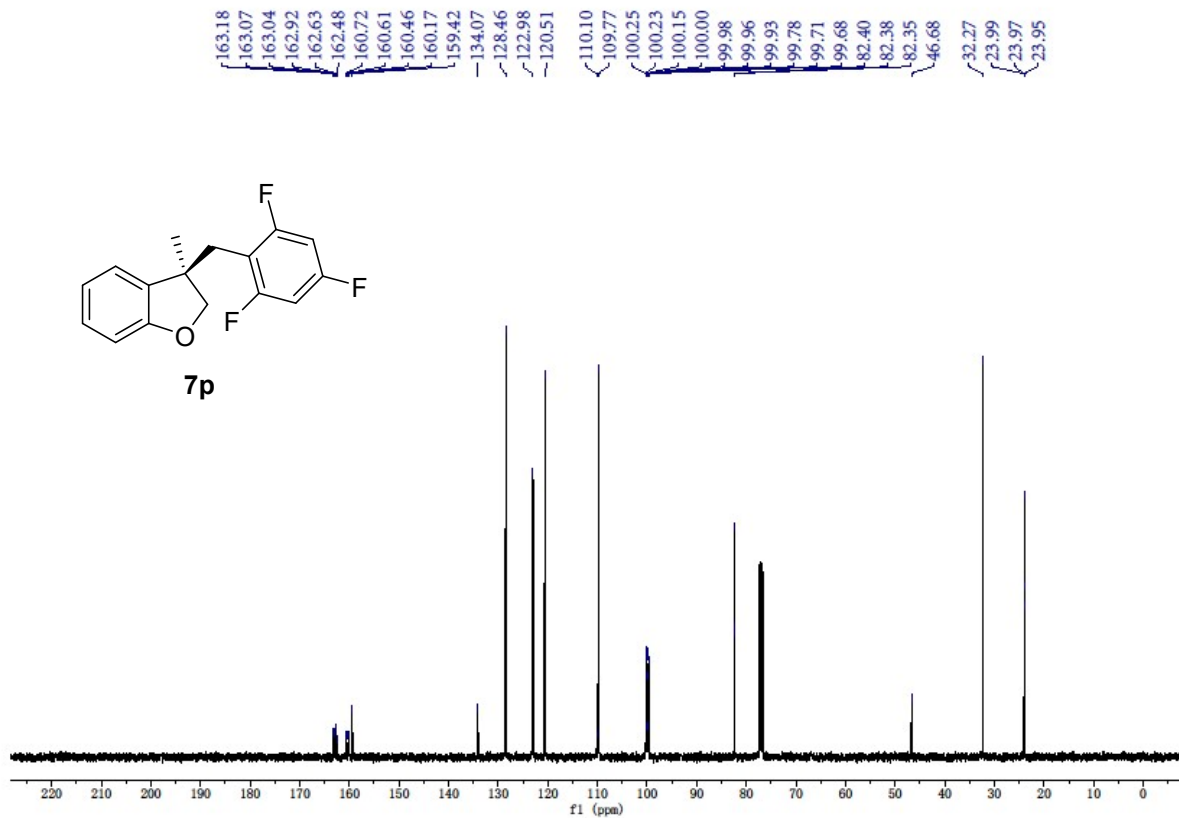

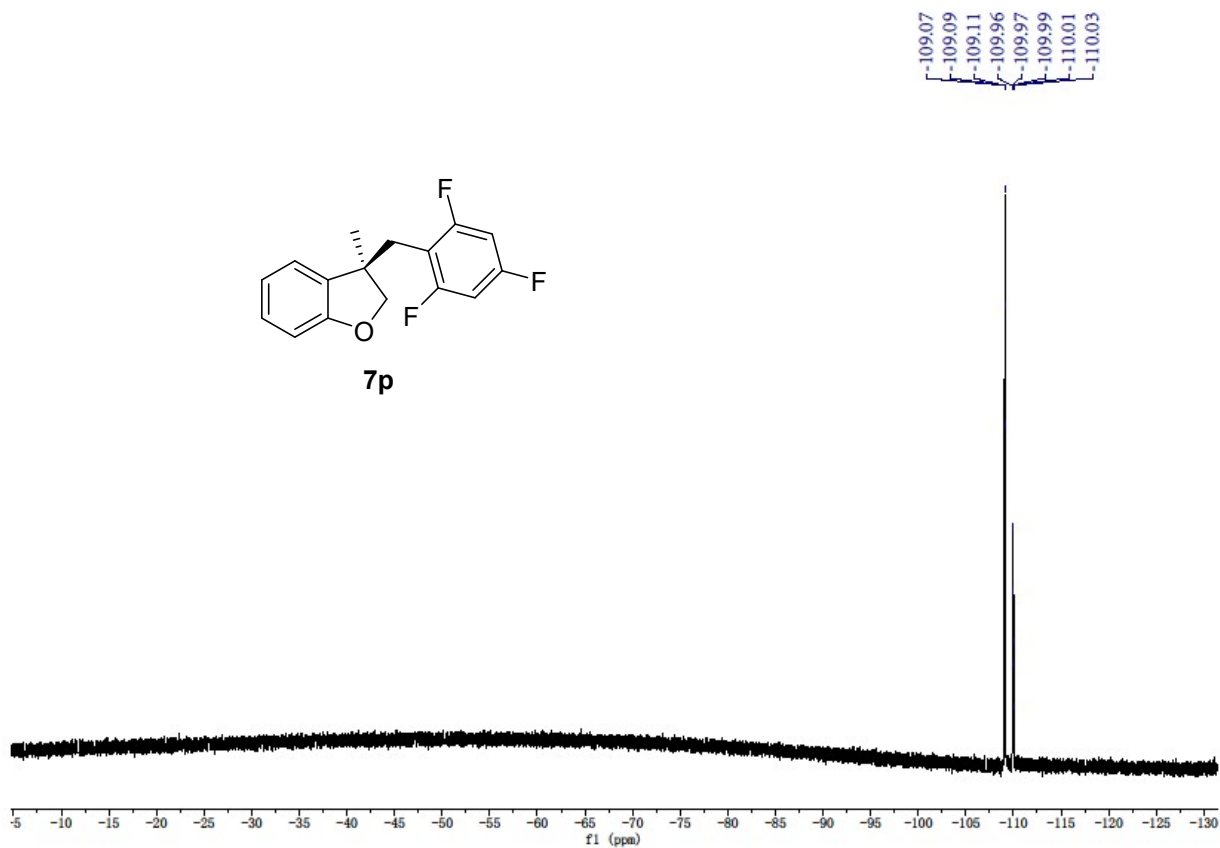

<Chromatogram>

mV

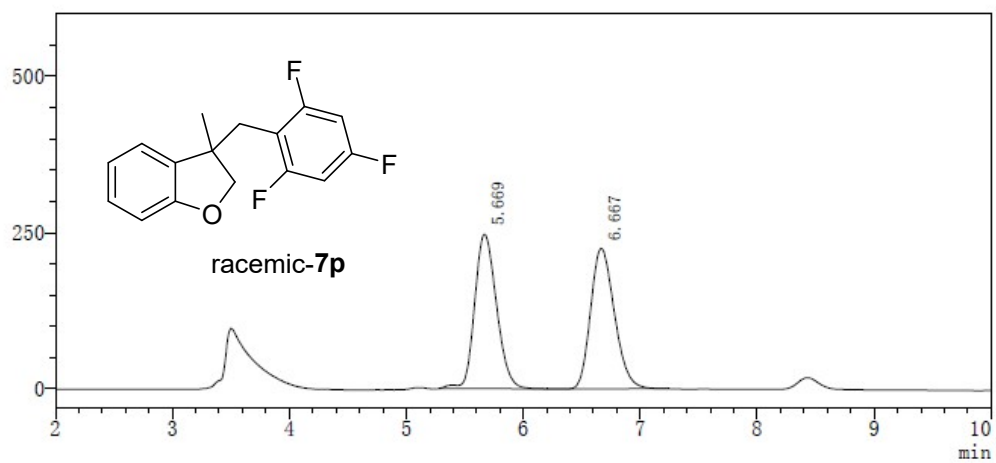

<Peak Table>

检测器A Ch2 210nm

| No.   | Ret. Time(min) | Height | Height% | Area    | Area%   |
|-------|----------------|--------|---------|---------|---------|
| 1     | 5.669          | 246979 | 52.355  | 3216619 | 50.267  |
| 2     | 6.667          | 224764 | 47.645  | 3182459 | 49.733  |
| Total |                | 471744 | 100.000 | 6399078 | 100.000 |

<Chromatogram>

mV

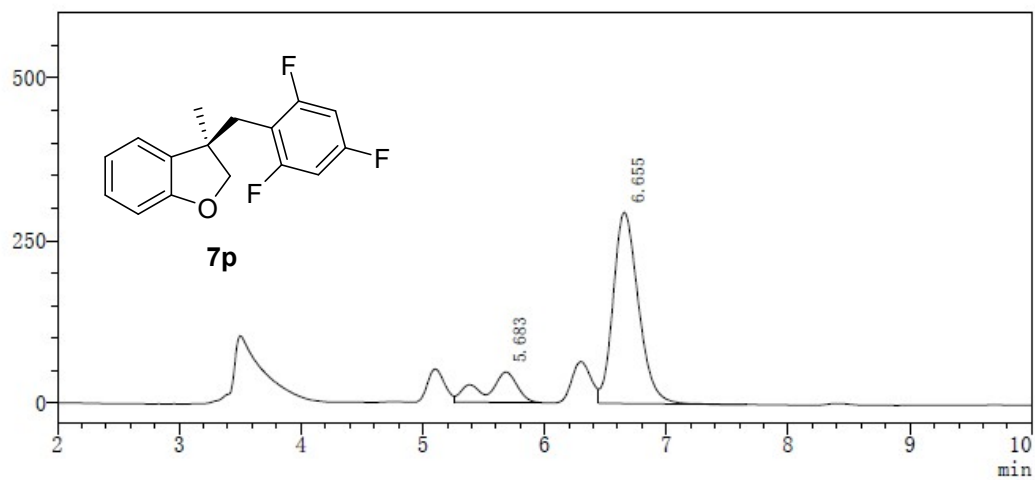

<Peak Table>

检测器A Ch2 210nm

| No.   | Ret. Time (min) | Height | Height% | Area    | Area%   |
|-------|-----------------|--------|---------|---------|---------|
| 1     | 5.683           | 46284  | 13.615  | 863389  | 16.922  |
| 2     | 6.655           | 293662 | 86.385  | 4238701 | 83.078  |
| Total |                 | 339947 | 100.000 | 5102090 | 100.000 |

7.95 7.93 7.93 7.55 7.54 7.54 7.53 7.52 7.52 7.51 7.50 7.50 7.49 7.49 7.49 7.48 7.47 7.47 7.46 7.46 7.21 7.20 7.20 7.18 7.18 7.16 7.16 7.14 7.14 6.95 6.86 6.82 6.80 6.80 4.72 4.70 4.29 4.26 3.30 3.27 3.22 3.19 1.52

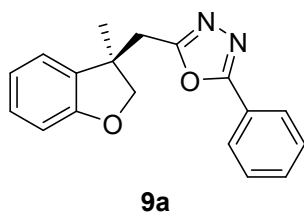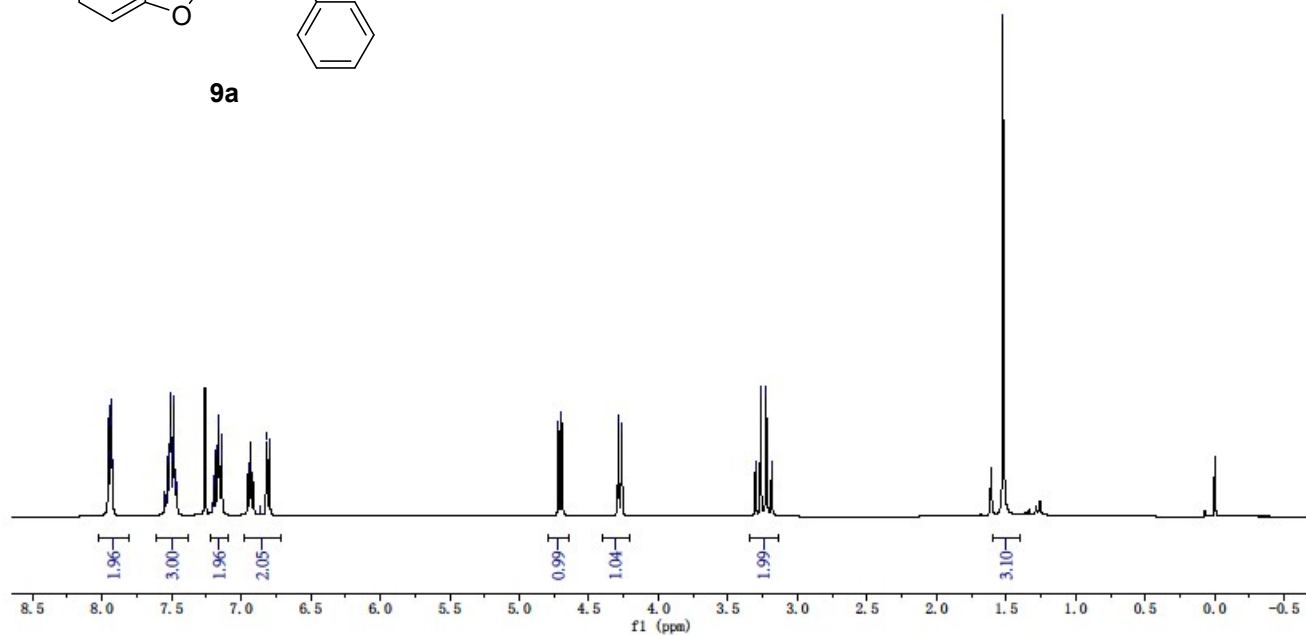

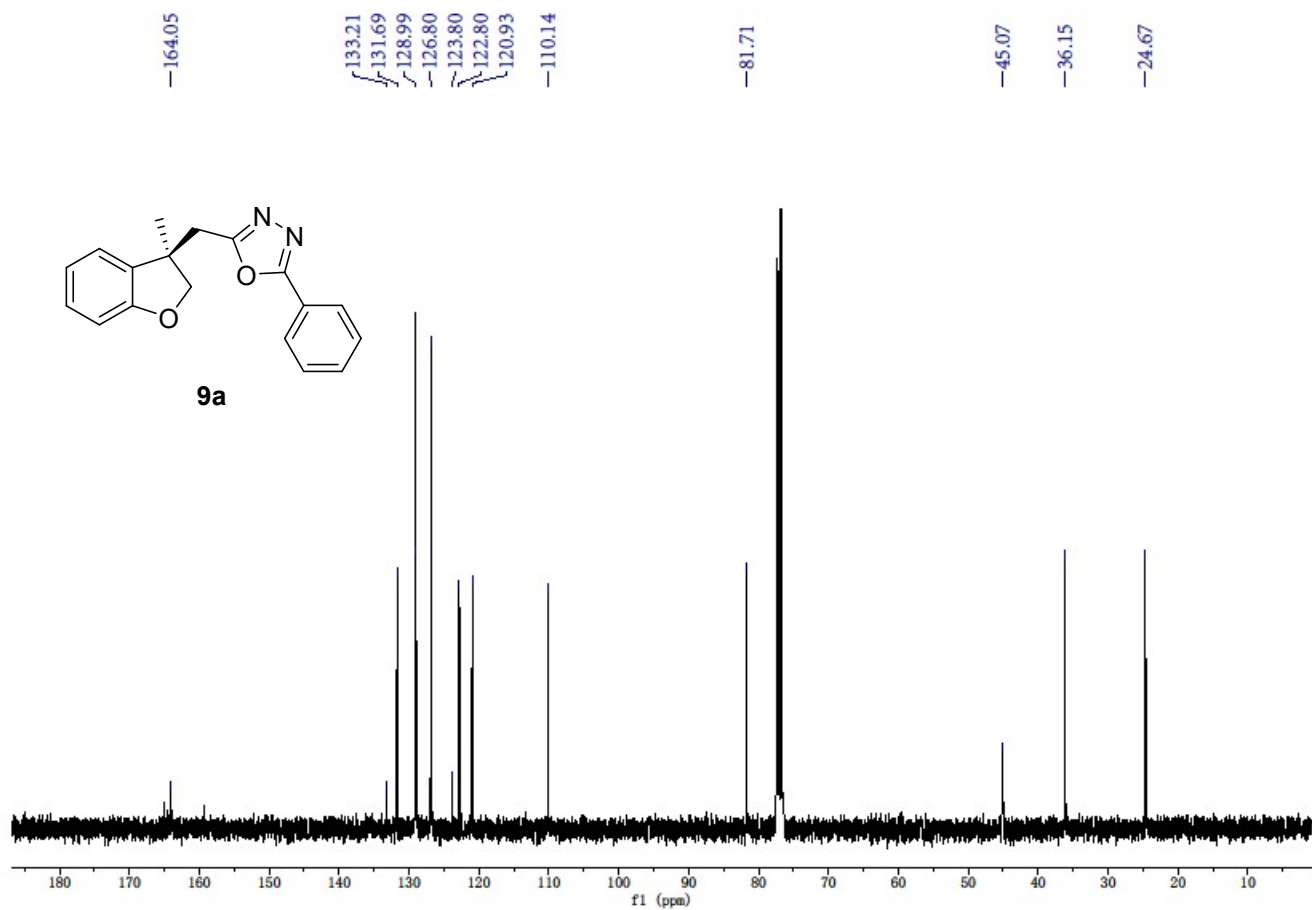

<Chromatogram>

mAU

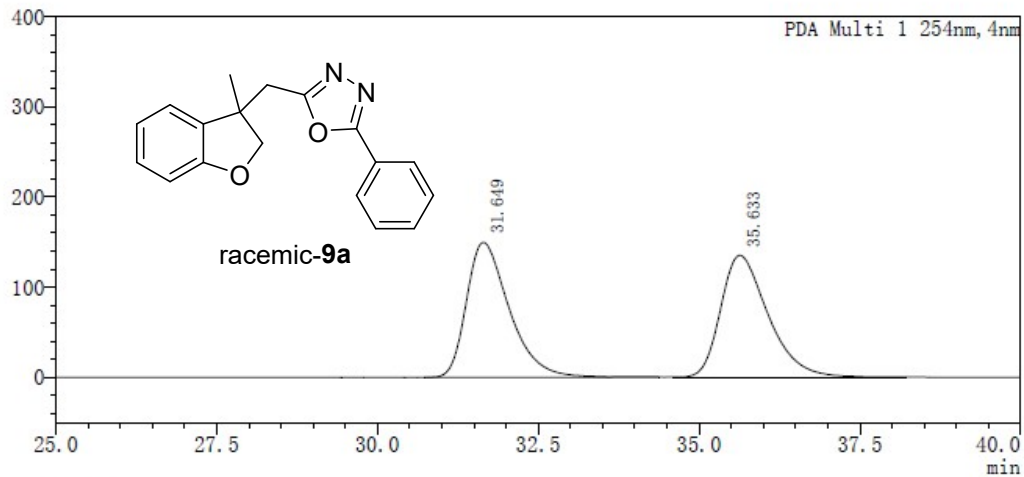

<Peak Table>

PDA Ch1 254nm

| No.   | Ret. Time(min) | Height | Height% | Area     | Area%   |
|-------|----------------|--------|---------|----------|---------|
| 1     | 31.649         | 149627 | 52.565  | 6943698  | 50.028  |
| 2     | 35.633         | 135023 | 47.435  | 6935901  | 49.972  |
| Total |                | 284650 | 100.000 | 13879599 | 100.000 |

<Chromatogram>

mAU

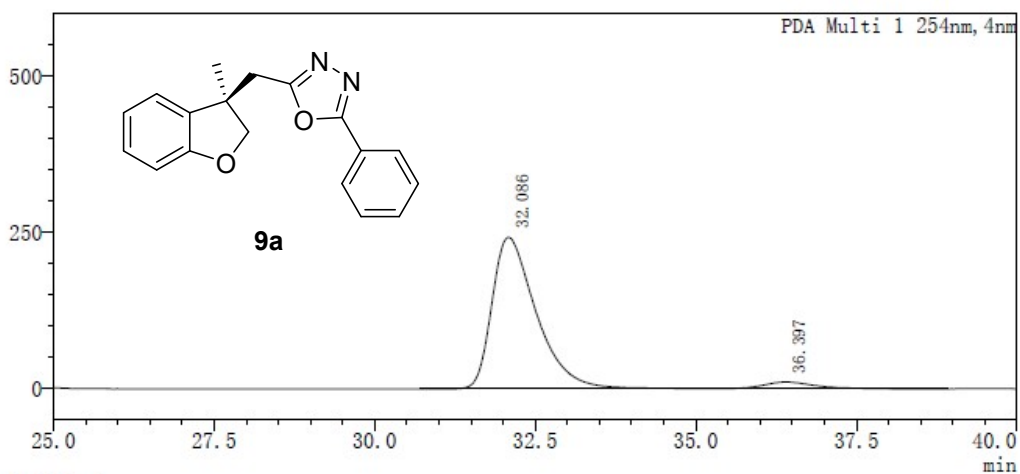

<Peak Table>

PDA Ch1 254nm

| No.   | Ret. Time (min) | Height | Height% | Area     | Area%   |
|-------|-----------------|--------|---------|----------|---------|
| 1     | 32.086          | 242709 | 95.821  | 11646596 | 95.259  |
| 2     | 36.397          | 10586  | 4.179   | 579658   | 4.741   |
| Total |                 | 253295 | 100.000 | 12226255 | 100.000 |

7.82  
7.81  
7.81  
7.80  
7.79  
7.11  
7.11  
7.11  
7.10  
7.09  
7.09  
7.09  
7.07  
7.07  
7.07  
6.93  
6.92  
6.91  
6.90  
6.88  
6.87  
6.86  
6.86  
6.86  
6.75  
6.75  
6.74  
6.73  
6.73  
4.65  
4.64  
4.62  
4.62  
4.22  
4.21  
4.19  
4.19  
3.81  
3.81  
3.80  
3.21  
3.18  
3.17  
3.13  
3.13  
3.09  
1.45  
1.45

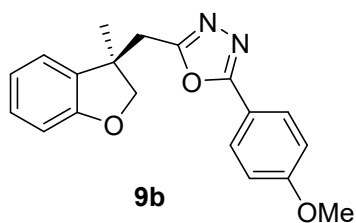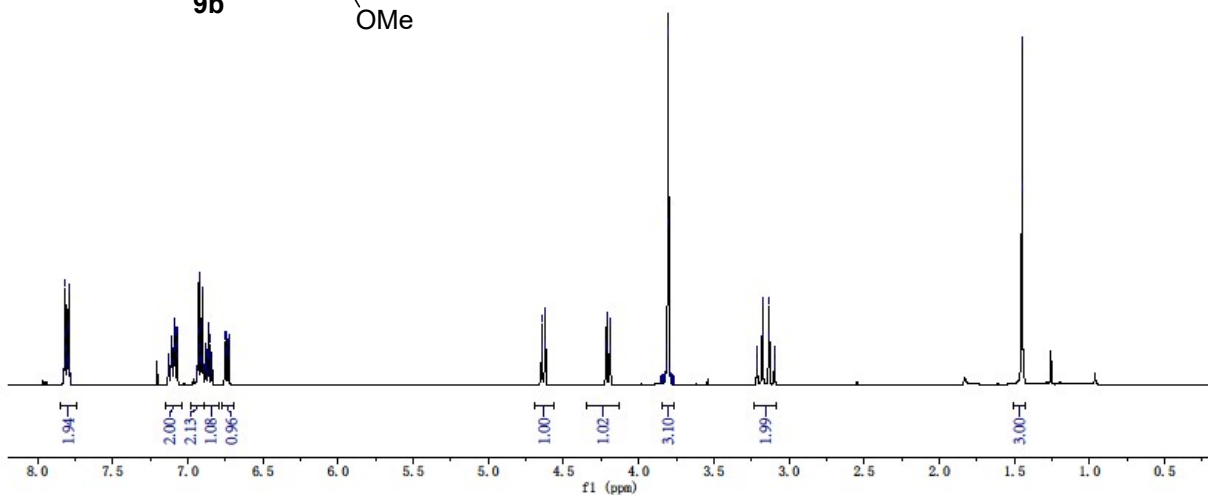

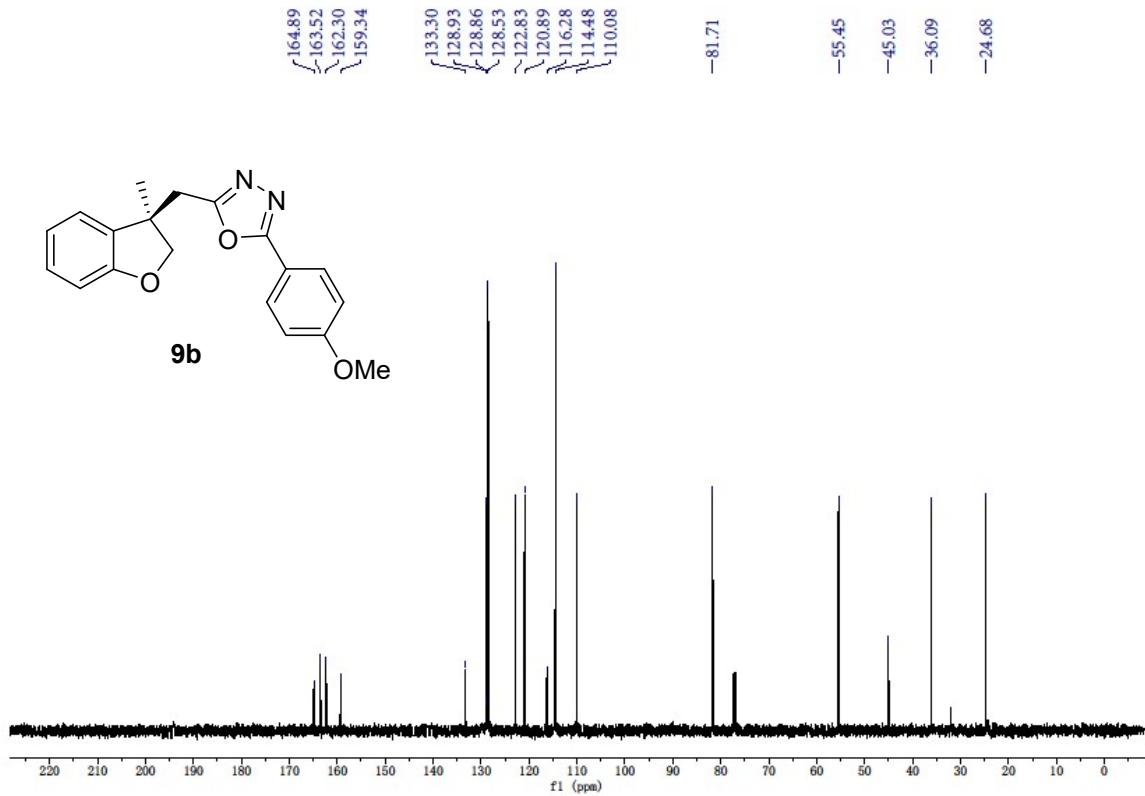

<Chromatogram>

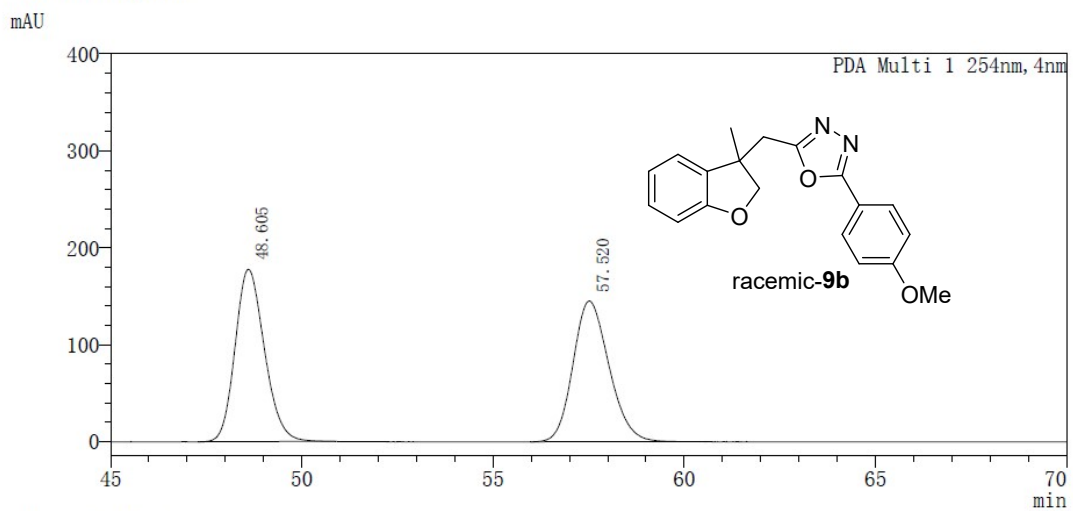

<Peak Table>

PDA Ch1 254nm

| No.   | Ret. Time(min) | Height | Height% | Area     | Area%   |
|-------|----------------|--------|---------|----------|---------|
| 1     | 48.605         | 177611 | 55.036  | 9495713  | 49.977  |
| 2     | 57.520         | 145108 | 44.964  | 9504556  | 50.023  |
| Total |                | 322719 | 100.000 | 19000269 | 100.000 |



<Chromatogram>

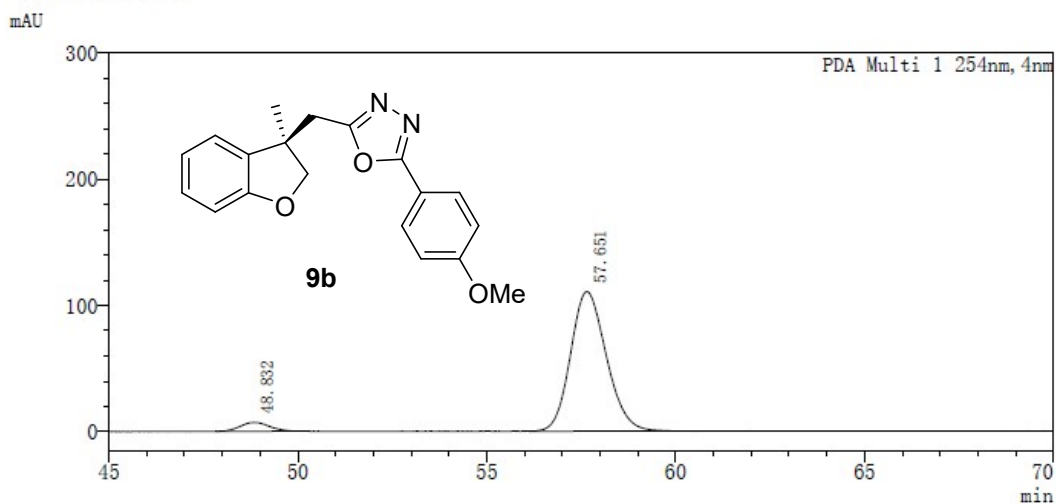

<Peak Table>

PDA Ch1 254nm

| No.   | Ret. Time (min) | Height | Height% | Area    | Area%   |
|-------|-----------------|--------|---------|---------|---------|
| 1     | 48.832          | 7150   | 6.080   | 386336  | 5.047   |
| 2     | 57.651          | 110454 | 93.920  | 7268720 | 94.953  |
| Total |                 | 117604 | 100.000 | 7655055 | 100.000 |

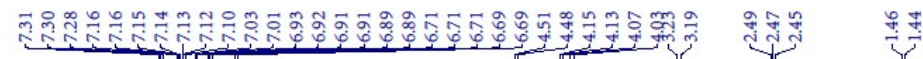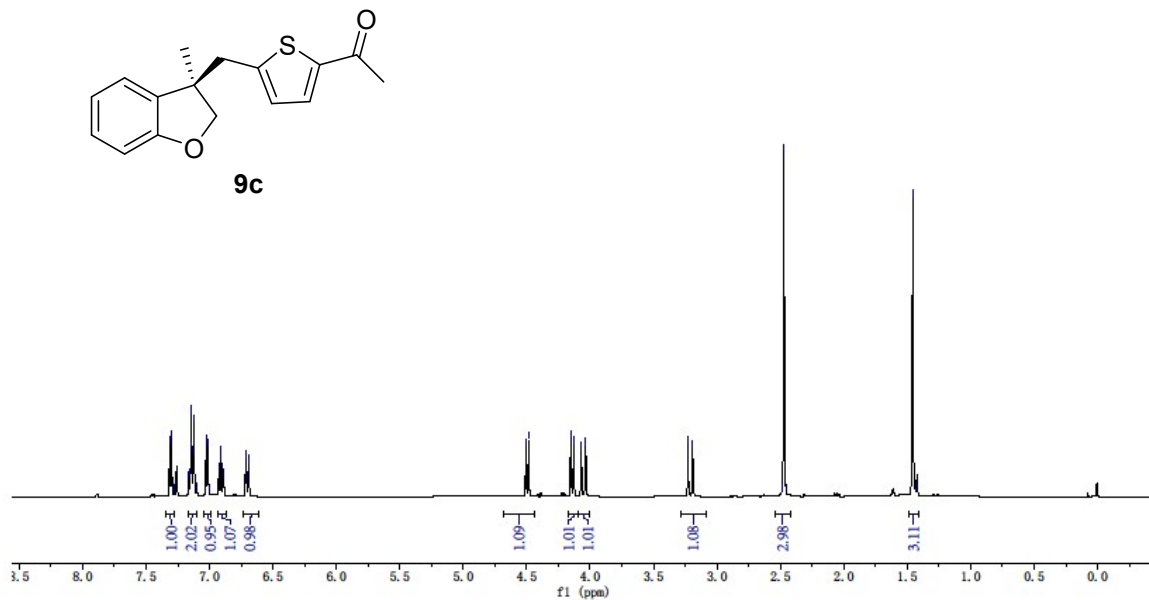

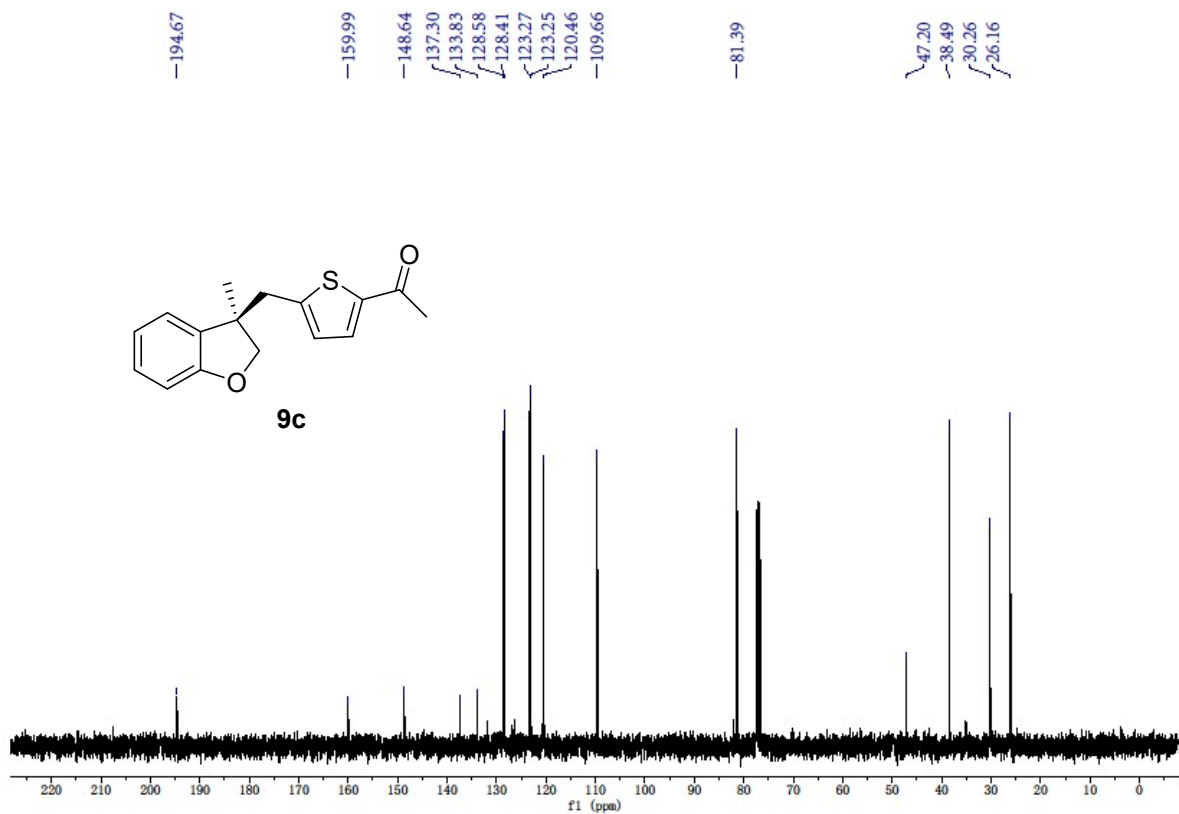

<Chromatogram>

mV

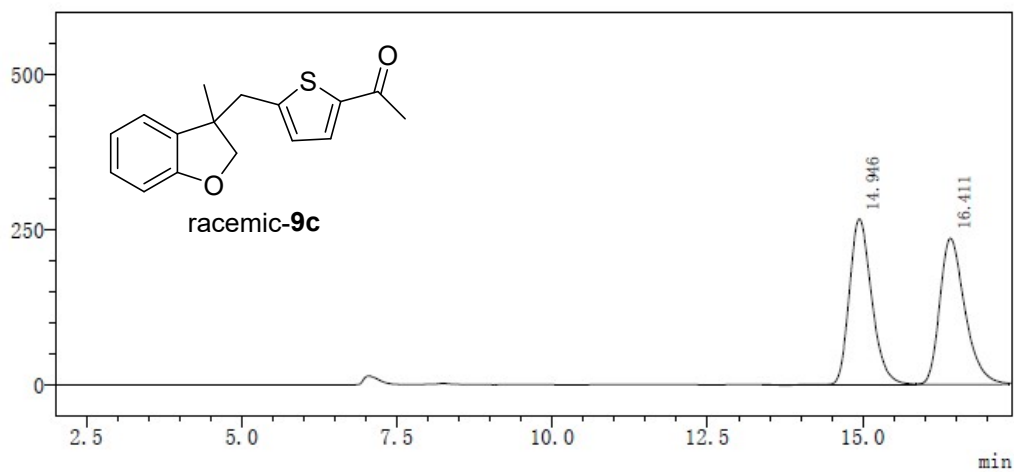

<Peak Table>

检测器A Ch1 254nm

| No.   | Ret. Time (min) | Height | Height% | Area     | Area%   |
|-------|-----------------|--------|---------|----------|---------|
| 1     | 14.946          | 266947 | 53.074  | 6661053  | 49.950  |
| 2     | 16.411          | 236021 | 46.926  | 6674519  | 50.050  |
| Total |                 | 502968 | 100.000 | 13335572 | 100.000 |

<Chromatogram>

mV

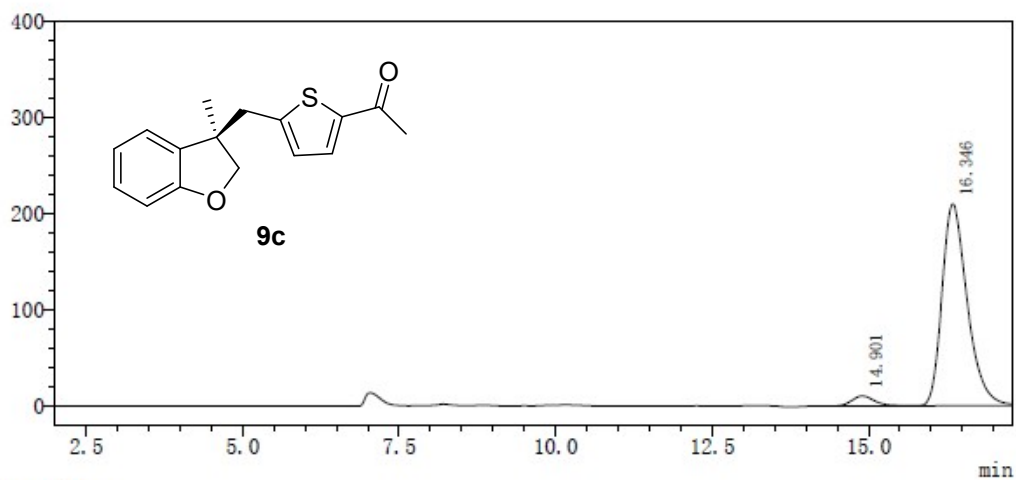

<Peak Table>

检测器A Ch1 254nm

| No.   | Ret. Time (min) | Height | Height% | Area    | Area%   |
|-------|-----------------|--------|---------|---------|---------|
| 1     | 14.901          | 10381  | 4.706   | 259941  | 4.214   |
| 2     | 16.346          | 210198 | 95.294  | 5908828 | 95.786  |
| Total |                 | 220580 | 100.000 | 6168769 | 100.000 |

7.77 7.77 7.75 7.75 7.75 7.71 7.70 7.69 7.68 7.35 7.34 7.34 7.33 7.32 7.32 7.31 7.31 7.29 7.29 7.29 7.21 7.20 7.19 7.19 7.15 7.15 7.15 7.14 7.13 6.97 6.96 6.96 6.95 6.95 6.94 6.93 6.84 6.84 6.82 6.82 4.63 4.61 4.21 4.19 3.24 3.23 3.22 1.50

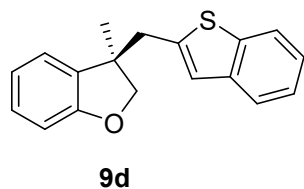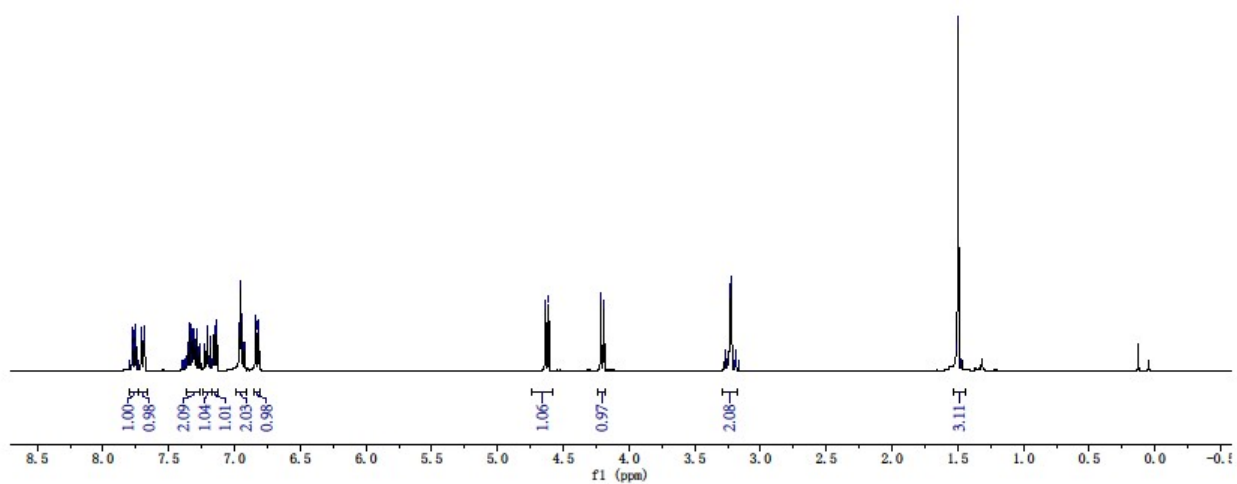

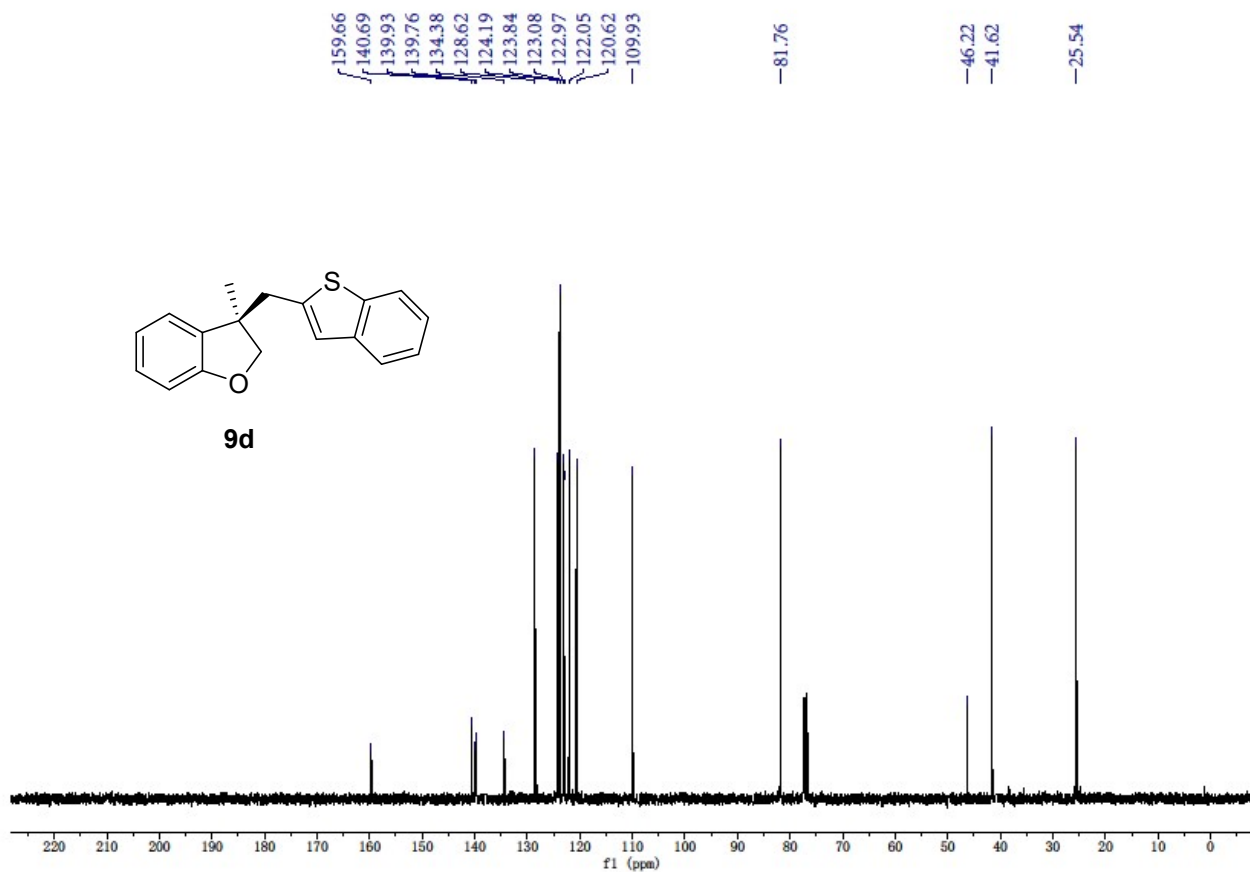

<Chromatogram>

mV

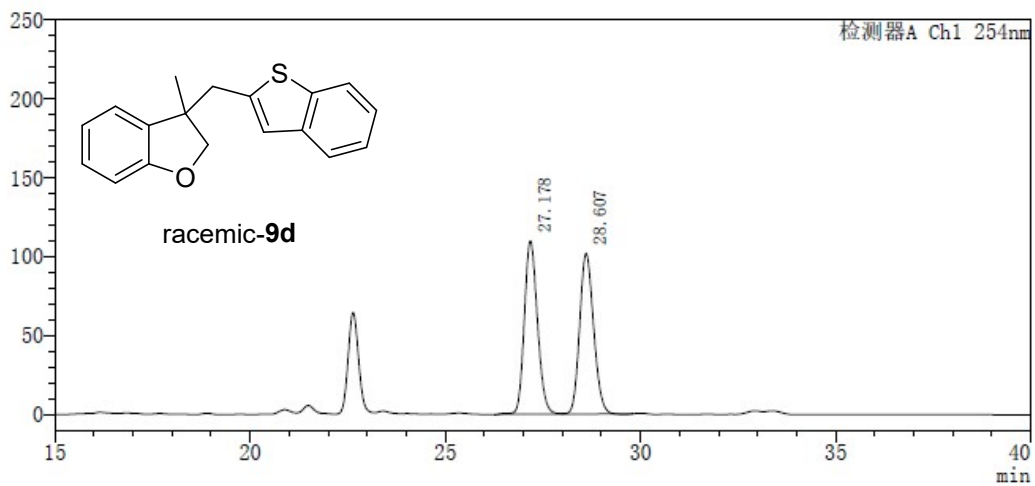

<Peak Table>

检测器A Ch1 254nm

| No.   | Ret. Time (min) | Height | Height% | Area    | Area%   |
|-------|-----------------|--------|---------|---------|---------|
| 1     | 27.178          | 109719 | 51.915  | 2574957 | 50.390  |
| 2     | 28.607          | 101625 | 48.085  | 2535127 | 49.610  |
| Total |                 | 211344 | 100.000 | 5110084 | 100.000 |

<Chromatogram>

mV

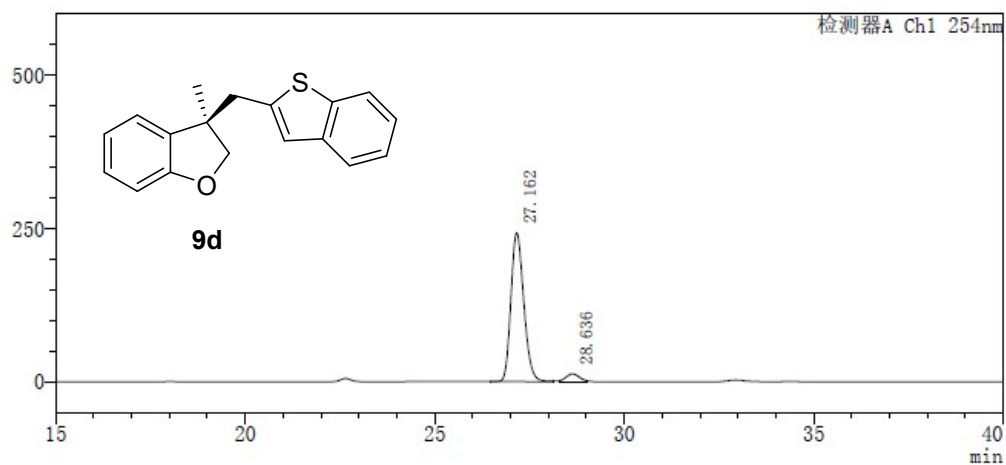

<Peak Table>

检测器A Ch1 254nm

| No.   | Ret. Time (min) | Height | Height% | Area    | Area%   |
|-------|-----------------|--------|---------|---------|---------|
| 1     | 27.162          | 242305 | 94.994  | 5731983 | 94.785  |
| 2     | 28.636          | 12770  | 5.006   | 315345  | 5.215   |
| Total |                 | 255074 | 100.000 | 6047328 | 100.000 |

7.51  
7.50  
7.50  
7.49  
7.48  
7.45  
7.44  
7.44  
7.43  
7.42  
7.42  
7.24  
7.24  
7.23  
7.23  
7.22  
7.22  
7.22  
7.21  
7.20  
7.20  
7.20  
7.18  
7.18  
7.17  
7.16  
7.16  
7.11  
7.10  
7.09  
7.08  
6.92  
6.90  
6.90  
6.83  
6.83  
6.81  
6.81  
6.36  
4.69  
4.67  
4.66  
4.21  
4.21  
4.19  
4.19  
3.08  
3.08  
1.43  
1.43

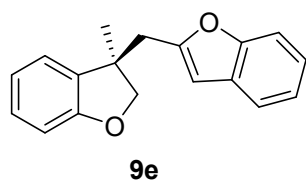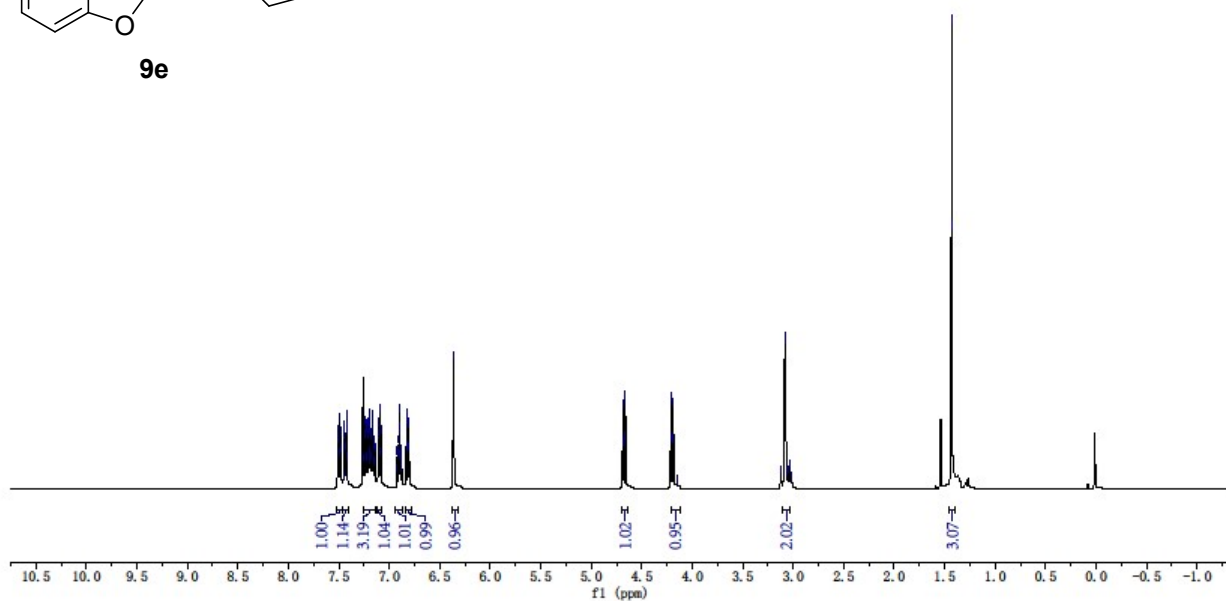

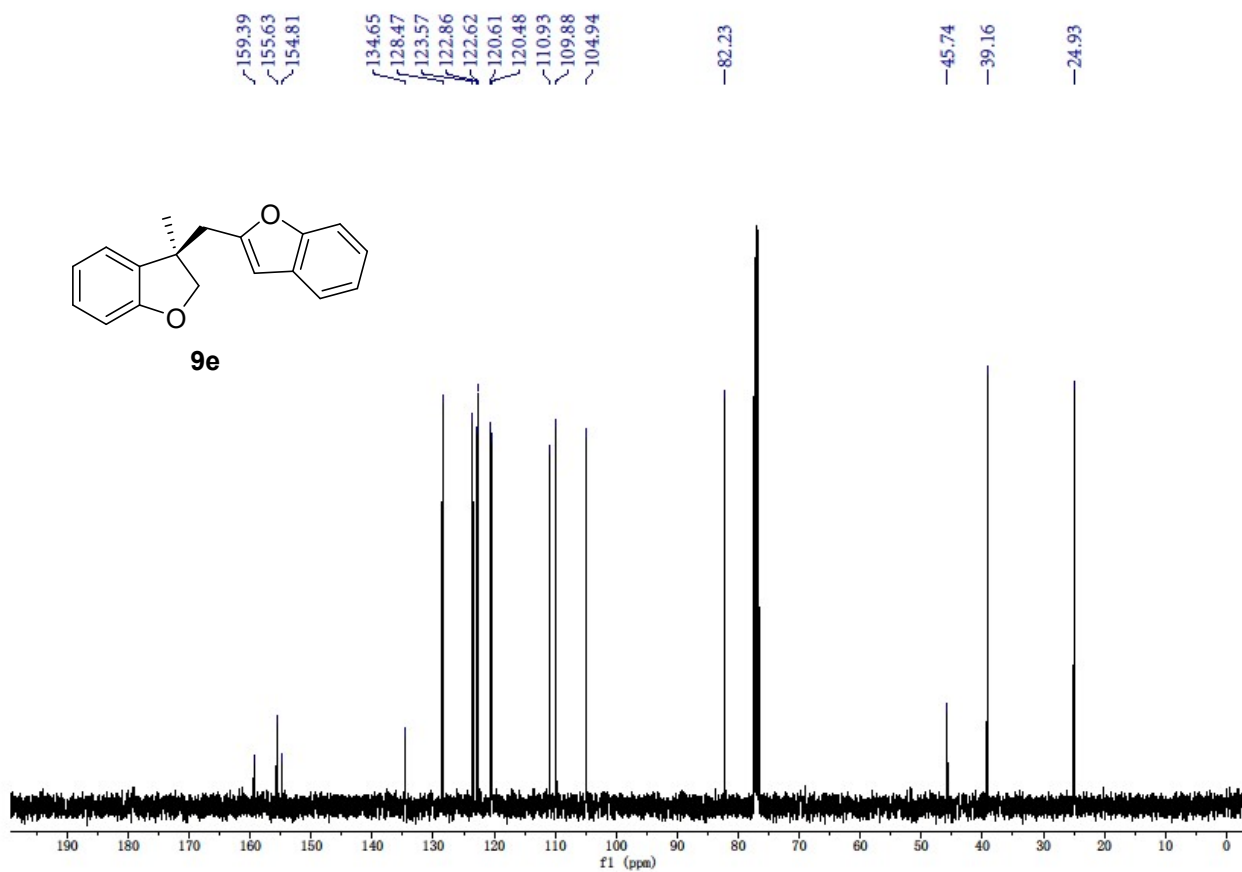

<Chromatogram>

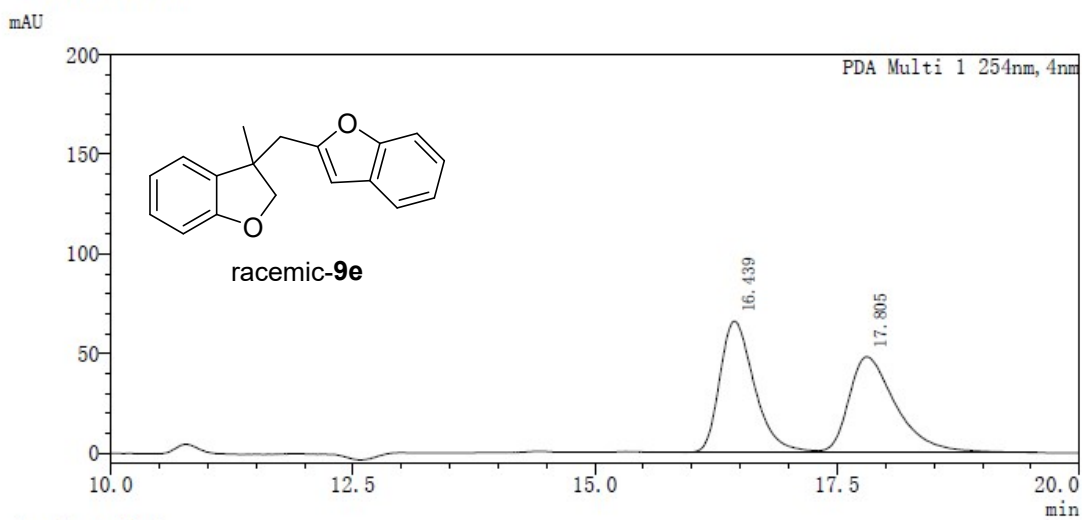

<Peak Table>

PDA Ch1 254nm

| No.   | Ret. Time (min) | Height | Height% | Area    | Area%   |
|-------|-----------------|--------|---------|---------|---------|
| 1     | 16.439          | 65885  | 57.798  | 1640250 | 50.098  |
| 2     | 17.805          | 48107  | 42.202  | 1633860 | 49.902  |
| Total |                 | 113992 | 100.000 | 3274110 | 100.000 |

<Chromatogram>

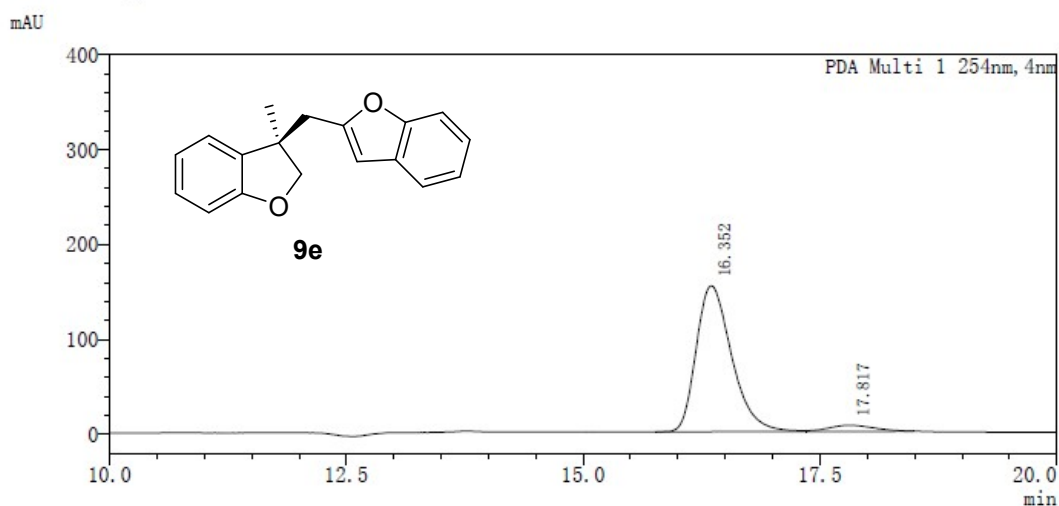

<Peak Table>

PDA Ch1 254nm

| No.   | Ret. Time (min) | Height | Height% | Area    | Area%   |
|-------|-----------------|--------|---------|---------|---------|
| 1     | 16.352          | 153625 | 95.991  | 4002564 | 94.987  |
| 2     | 17.817          | 6415   | 4.009   | 211221  | 5.013   |
| Total |                 | 160040 | 100.000 | 4213785 | 100.000 |

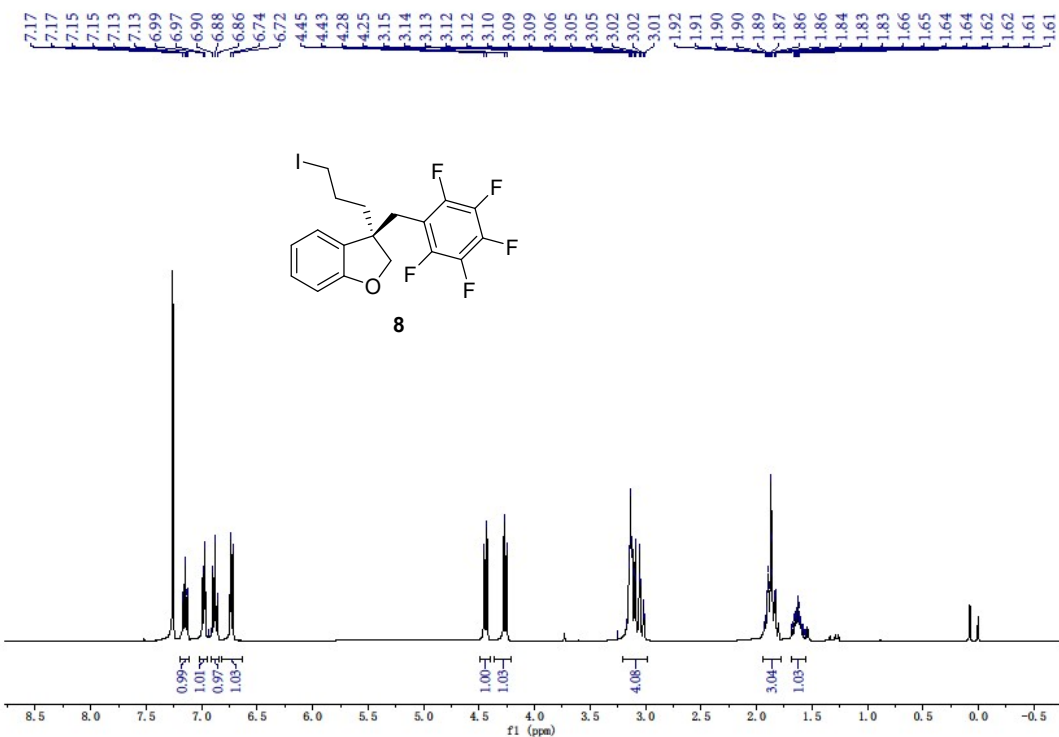

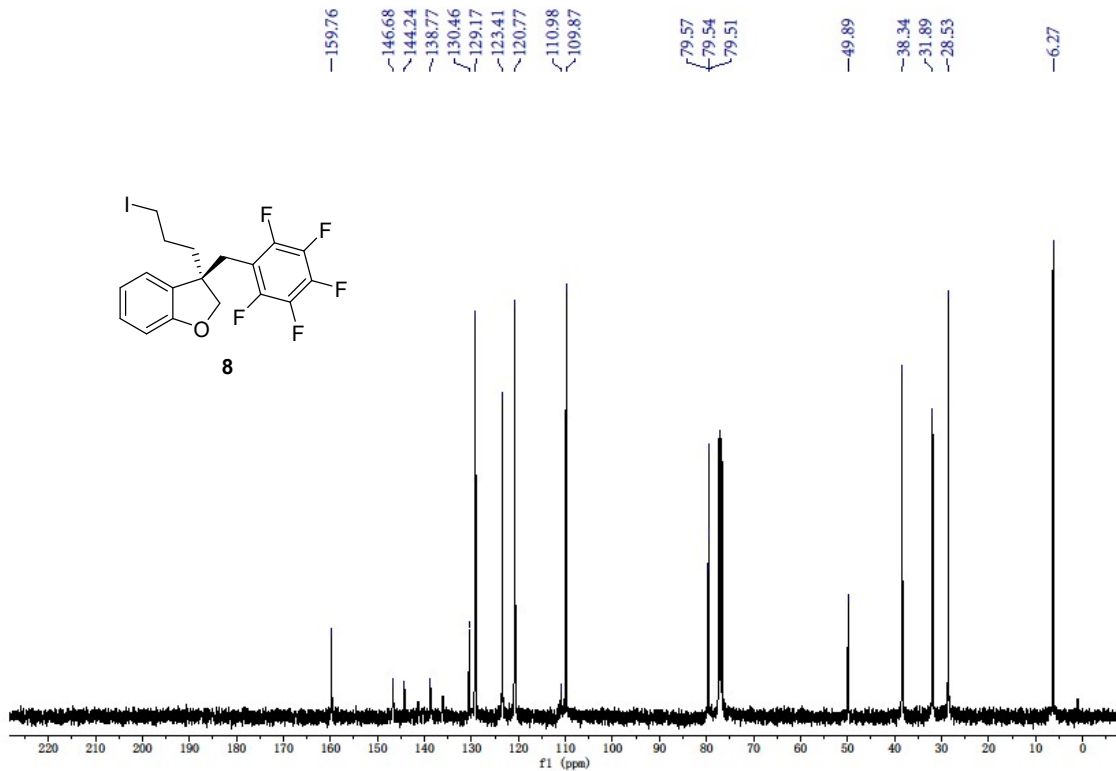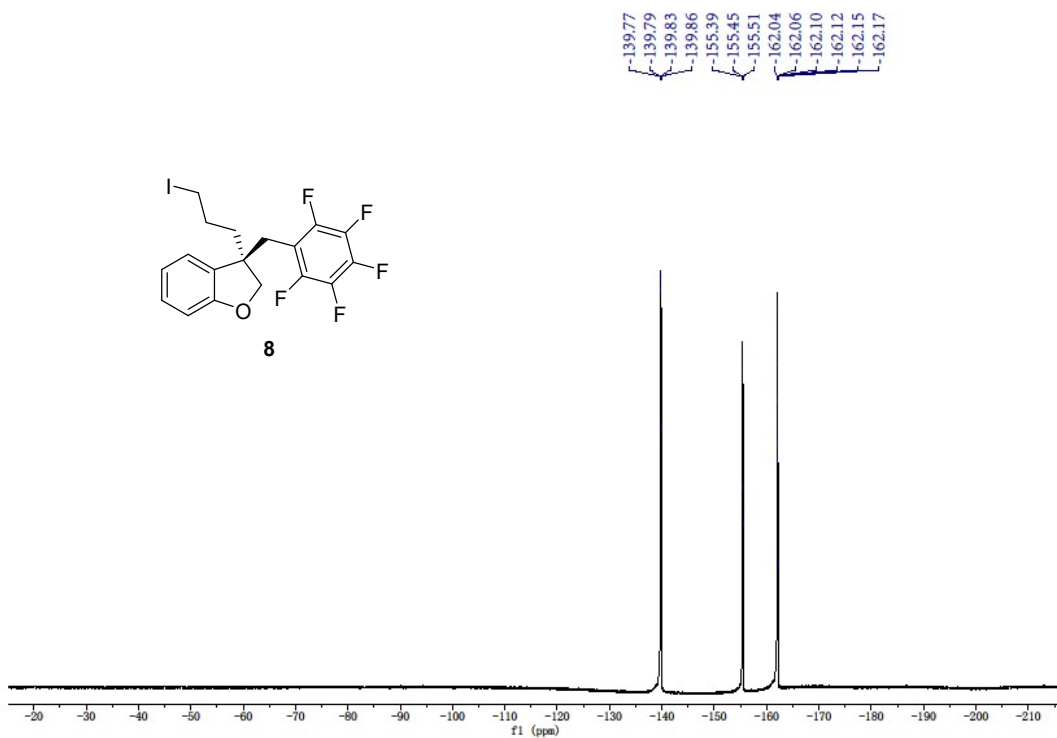



<Chromatogram>

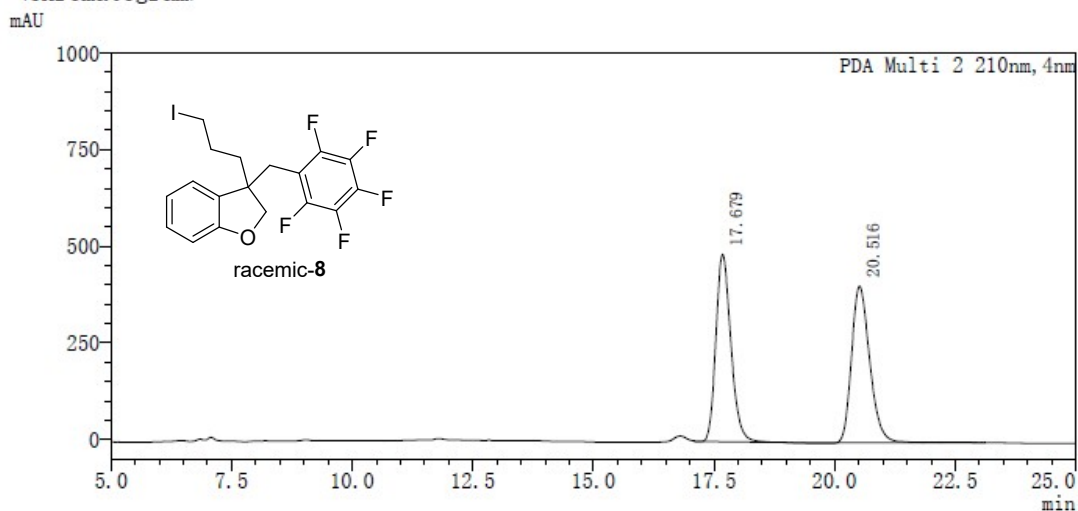

<Peak Table>

PDA Ch2 210nm

| No.   | Ret. Time(min) | Height | Height% | Area     | Area%   |
|-------|----------------|--------|---------|----------|---------|
| 1     | 17.679         | 484020 | 54.472  | 10520402 | 50.045  |
| 2     | 20.516         | 404540 | 45.528  | 10501433 | 49.955  |
| Total |                | 888560 | 100.000 | 21021835 | 100.000 |

<Chromatogram>

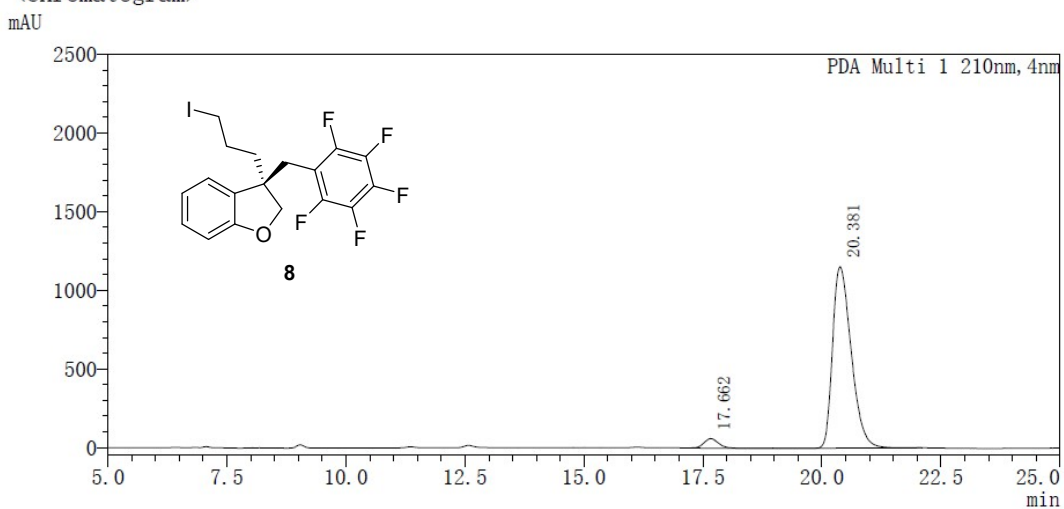

<Peak Table>

PDA Ch1 210nm

| No.   | Ret. Time(min) | Height  | Height% | Area     | Area%   |
|-------|----------------|---------|---------|----------|---------|
| 1     | 17.662         | 59841   | 4.926   | 1239125  | 3.782   |
| 2     | 20.381         | 1155045 | 95.074  | 31524318 | 96.218  |
| Total |                | 1214886 | 100.000 | 32763443 | 100.000 |

7.15  
7.13  
7.12  
6.98  
6.96  
6.88  
6.86  
6.84  
6.73  
6.71  
4.46  
4.43  
4.29  
4.27  
3.63  
3.62  
3.60  
3.59  
3.13  
3.13  
3.12  
3.10  
3.09  
3.09  
3.06  
3.05  
3.05  
3.02  
3.02  
3.01  
1.84  
1.82  
1.81  
1.80  
1.68  
1.66  
1.65  
1.64  
1.62  
1.41  
1.40  
1.39  
1.37  
1.36  
1.36  
1.35  
1.33

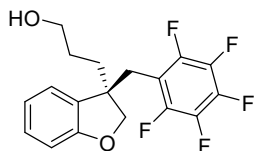

9

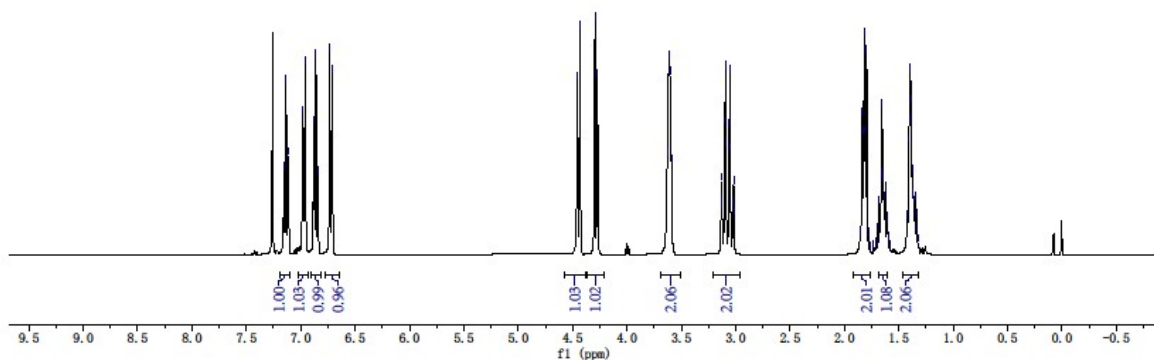

159.81  
146.68  
144.25  
138.71  
130.89  
128.99  
123.42  
120.67  
111.20  
109.76  
79.66  
79.64  
79.61  
62.82  
50.06  
33.64  
31.82  
27.79

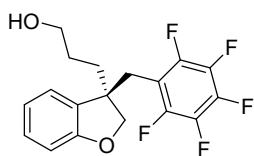

9

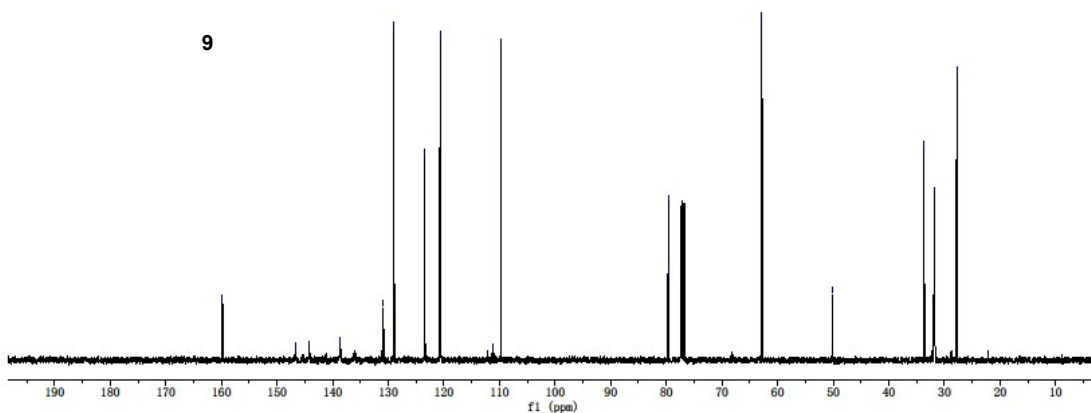

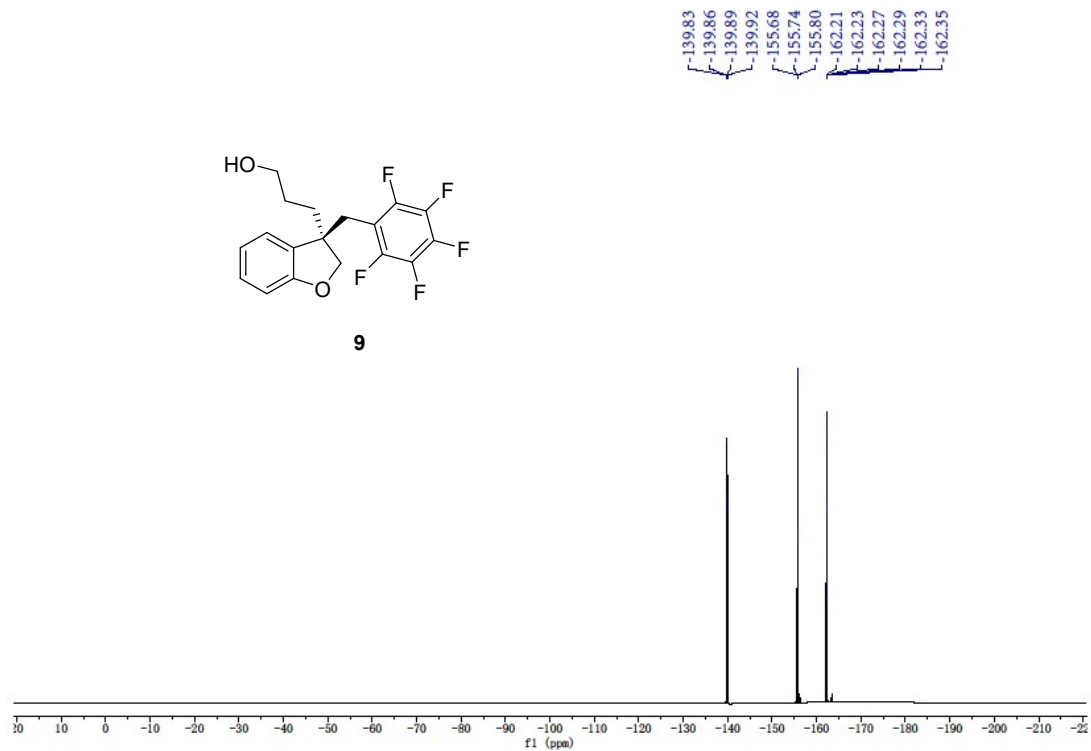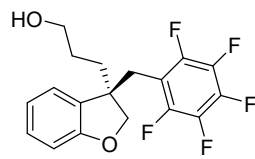

**9**

<Chromatogram>

mV

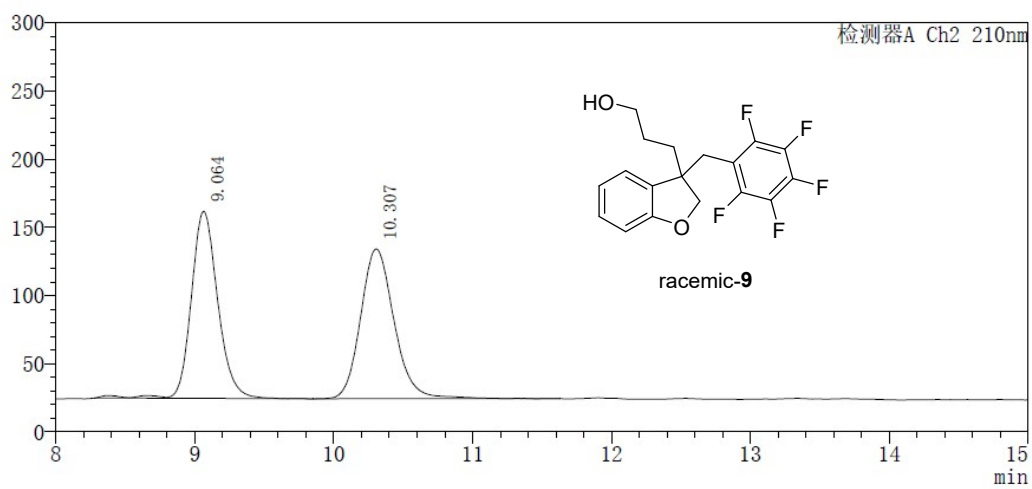

<Peak Table>

检测器A Ch2 210nm

| No.   | Ret. Time (min) | Height | Height% | Area    | Area%   |
|-------|-----------------|--------|---------|---------|---------|
| 1     | 9.064           | 137137 | 55.514  | 1829053 | 49.802  |
| 2     | 10.307          | 109896 | 44.486  | 1843607 | 50.198  |
| Total |                 | 247033 | 100.000 | 3672660 | 100.000 |

<Chromatogram>

mV

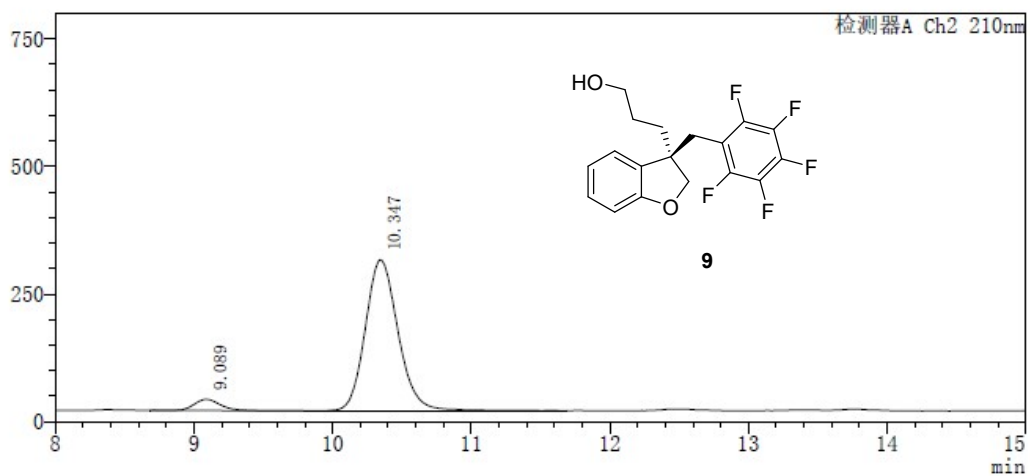

<Peak Table>

检测器A Ch2 210nm

| No.   | Ret. Time (min) | Height | Height% | Area    | Area%   |
|-------|-----------------|--------|---------|---------|---------|
| 1     | 9.089           | 21857  | 6.887   | 282309  | 5.483   |
| 2     | 10.347          | 295502 | 93.113  | 4866438 | 94.517  |
| Total |                 | 317359 | 100.000 | 5148747 | 100.000 |

7.33 7.32 7.30 7.30 7.29 7.27 7.27 7.26 7.26 7.24 7.24 7.23 7.17 7.15 7.13 7.01 6.99 6.89 6.87 6.86 6.74 6.72 4.51 4.48 4.29 4.27 4.27 3.51 3.50 3.48 3.19 3.16 3.11 3.08 1.96 1.94 1.93 1.92 1.91 1.90 1.88 1.85 1.84 1.82 1.82 1.81 1.63 1.62 1.61 1.60 1.59 1.58 1.57

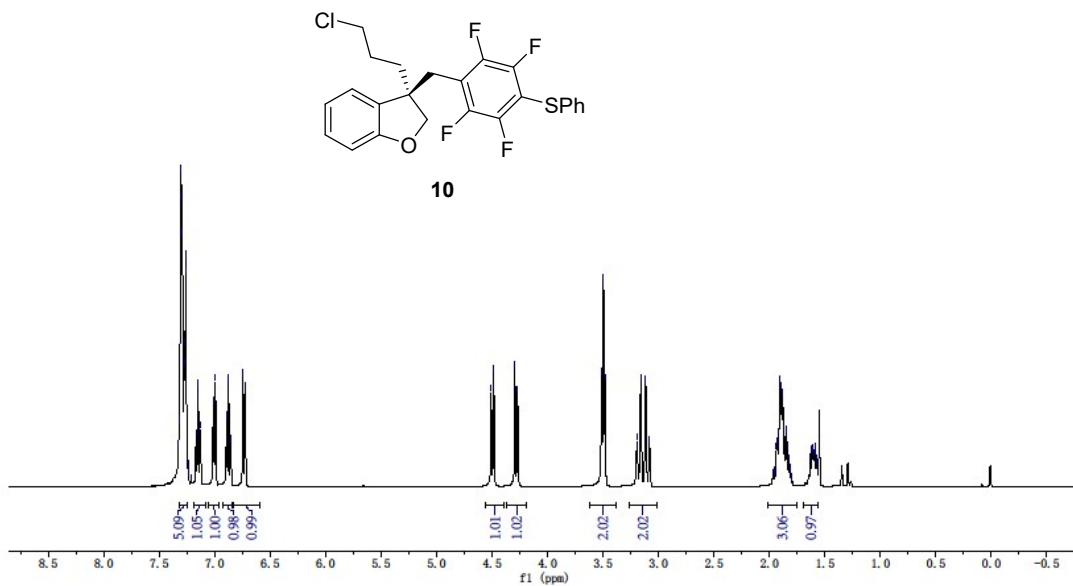

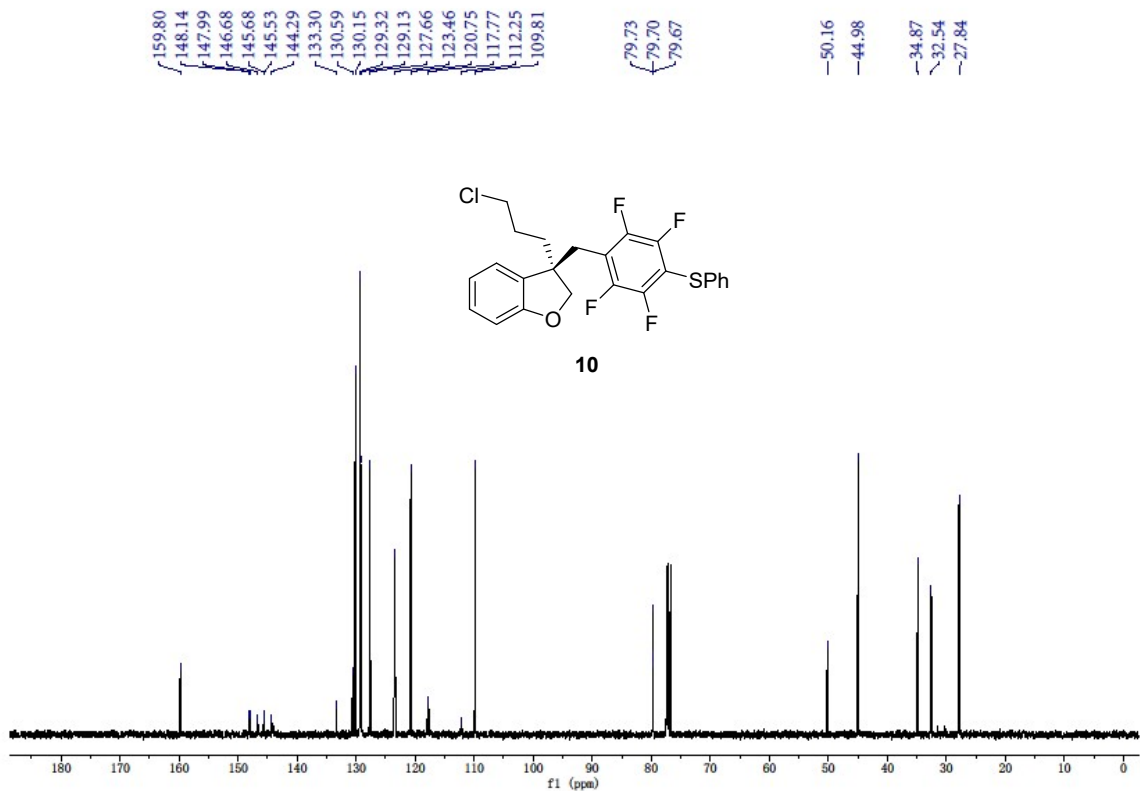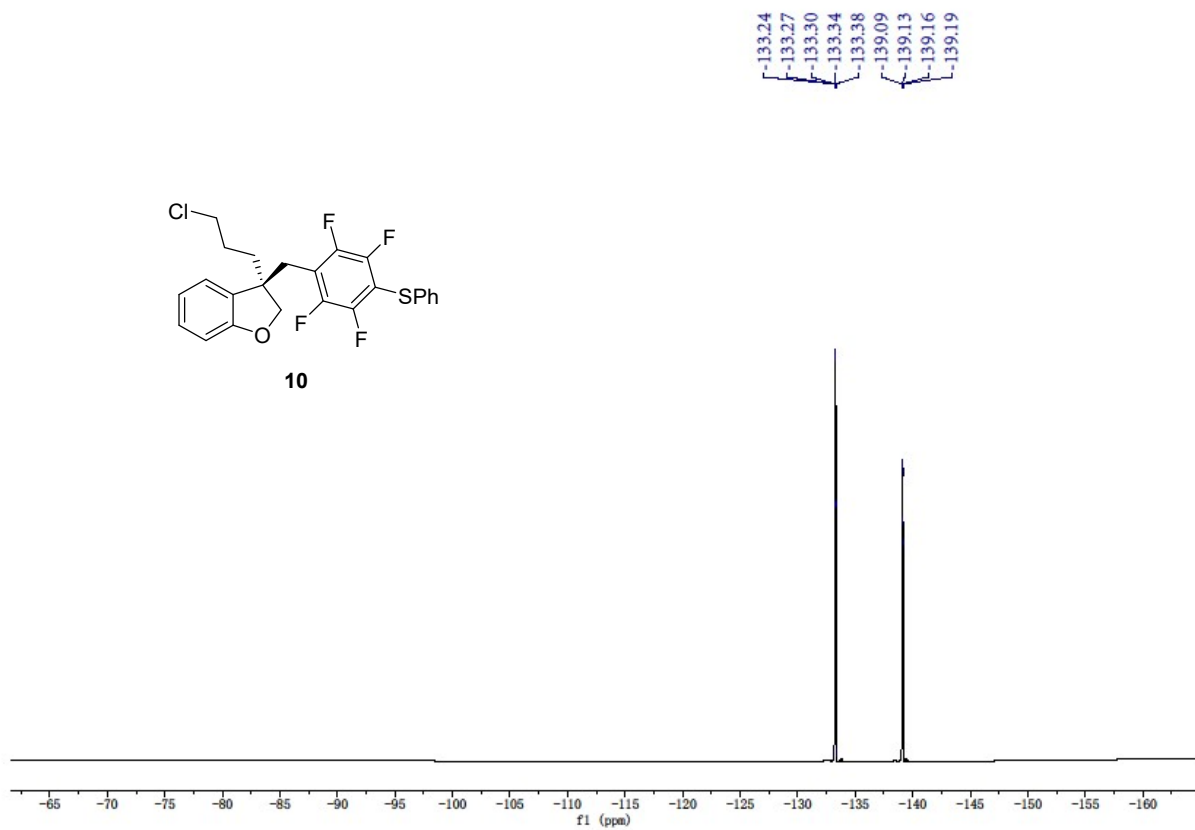

<Chromatogram>

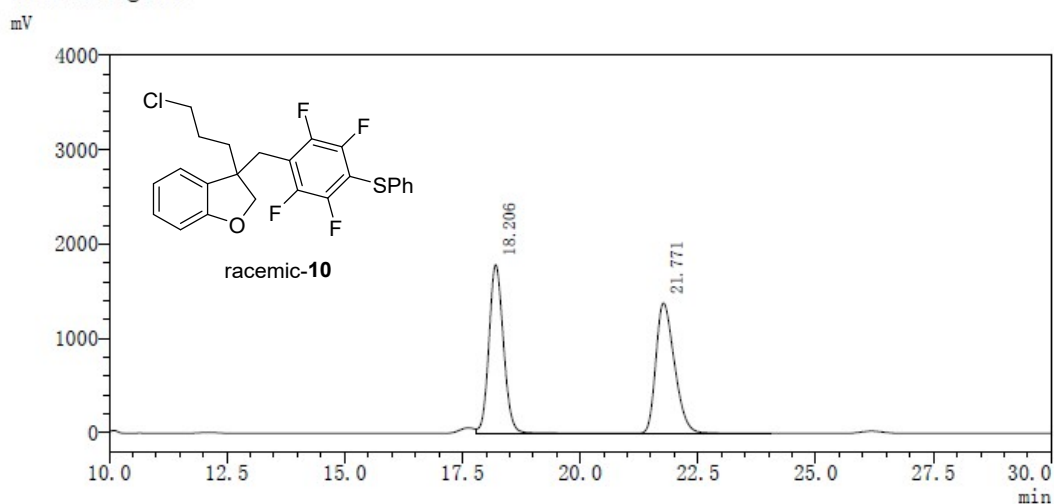

<Peak Table>

检测器A Ch2 210nm

| No.   | Ret. Time (min) | Height  | Height% | Area     | Area%   |
|-------|-----------------|---------|---------|----------|---------|
| 1     | 18.206          | 1784132 | 56.415  | 38058507 | 50.256  |
| 2     | 21.771          | 1378391 | 43.585  | 37670333 | 49.744  |
| Total |                 | 3162522 | 100.000 | 75728840 | 100.000 |

<Chromatogram>

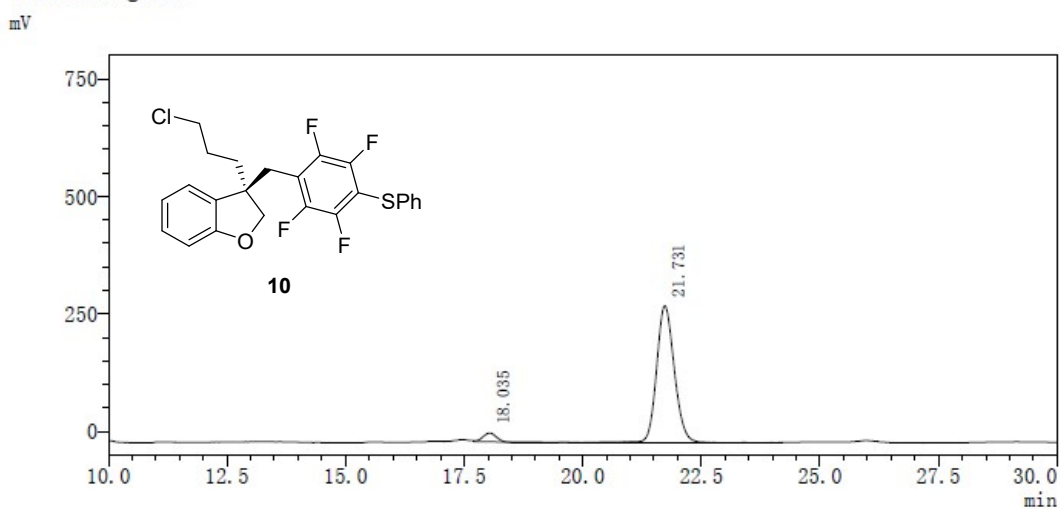

<Peak Table>

检测器A Ch2 210nm

| No.   | Ret. Time (min) | Height | Height% | Area    | Area%   |
|-------|-----------------|--------|---------|---------|---------|
| 1     | 18.035          | 18265  | 5.914   | 276605  | 3.536   |
| 2     | 21.731          | 290607 | 94.086  | 7545019 | 96.464  |
| Total |                 | 308872 | 100.000 | 7821624 | 100.000 |

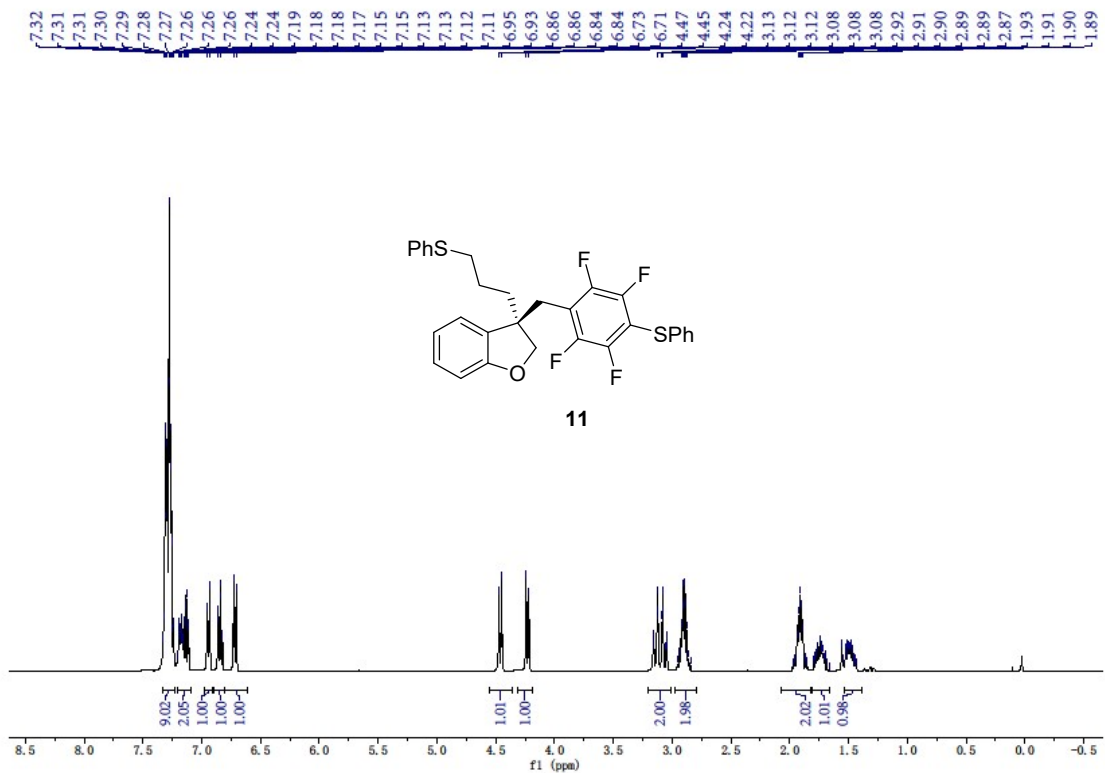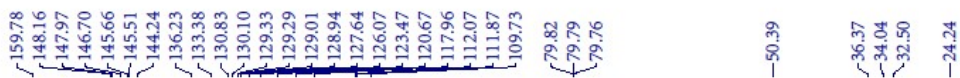

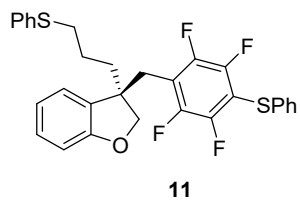

-133.31  
-133.34  
-133.37  
-133.40  
-139.07  
-139.11  
-139.14  
-139.17

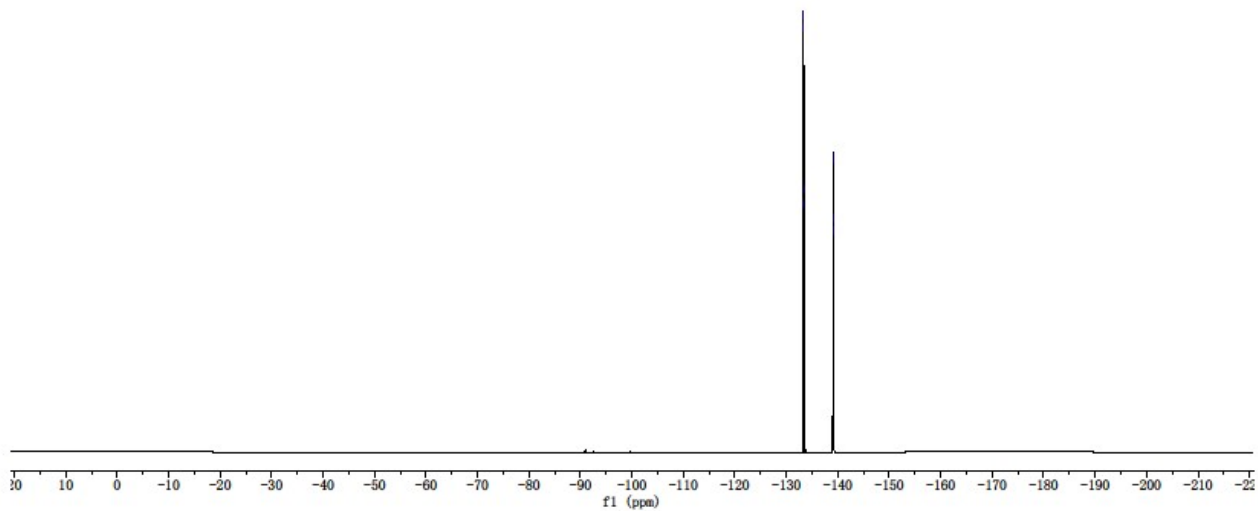

<Chromatogram>

mV

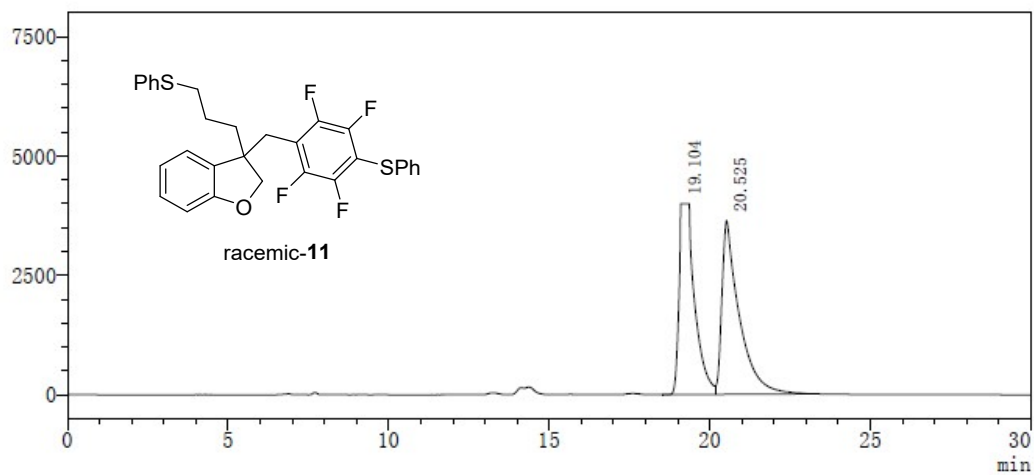

<Peak Table>

检测器A Ch2 210nm

| No.   | Ret. Time(min) | Height  | Height% | Area      | Area%   |
|-------|----------------|---------|---------|-----------|---------|
| 1     | 19.104         | 3996610 | 52.340  | 135286896 | 49.804  |
| 2     | 20.525         | 3639228 | 47.660  | 136351073 | 50.196  |
| Total |                | 7635838 | 100.000 | 271637970 | 100.000 |



<Chromatogram>

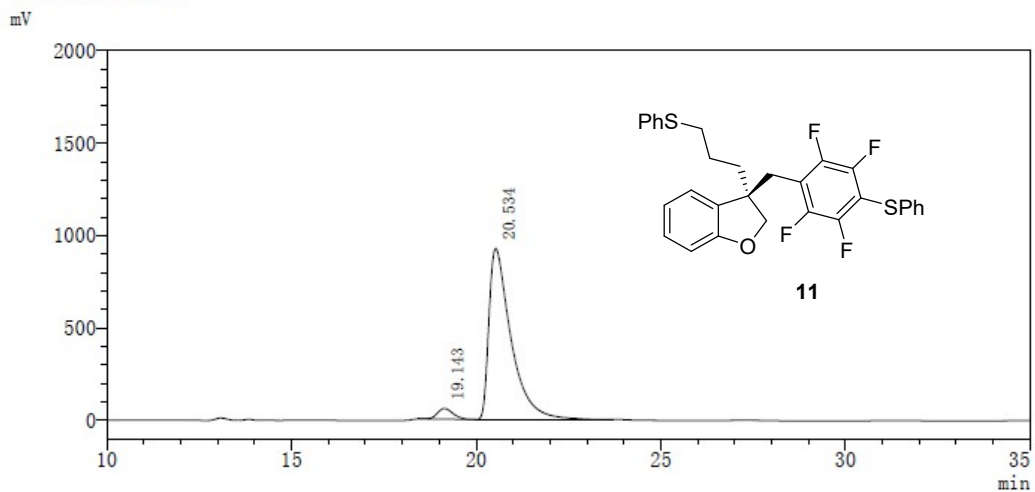

<Peak Table>

检测器A Ch2 210nm

| No.   | Ret. Time(min) | Height | Height% | Area     | Area%   |
|-------|----------------|--------|---------|----------|---------|
| 1     | 19.143         | 58078  | 5.912   | 1712786  | 4.260   |
| 2     | 20.534         | 924308 | 94.088  | 38491503 | 95.740  |
| Total |                | 982386 | 100.000 | 40204289 | 100.000 |

7.72  
7.70  
7.29  
7.29  
7.28  
7.27  
7.27  
7.24  
7.24  
7.23  
7.22  
7.22  
7.21  
7.20  
7.20  
7.20  
7.20  
7.19  
7.19  
7.18  
7.18  
7.14  
7.12  
7.10  
7.08  
6.96  
6.96  
6.94  
6.94  
6.93  
6.80  
6.79  
6.79  
6.78  
6.78  
4.55  
4.36  
4.34  
3.55  
3.54  
3.52  
3.24  
3.20  
3.20  
2.00  
2.00  
1.98  
1.97  
1.96

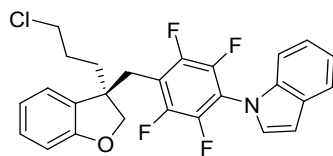

12

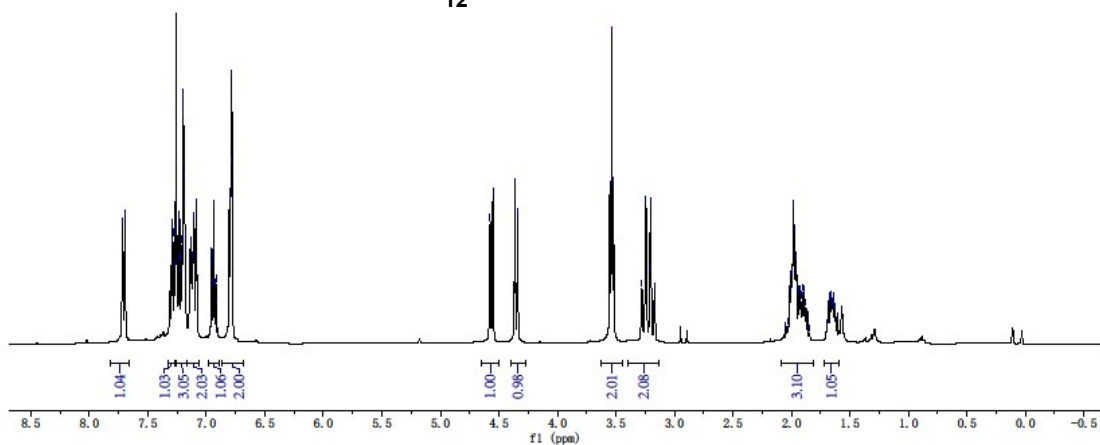

-159.80  
 143.83  
 141.32  
 136.21  
 130.52  
 129.17  
 128.65  
 128.17  
 123.46  
 123.07  
 121.19  
 121.17  
 120.82  
 120.79  
 115.48  
 110.38  
 109.83  
 105.44  
 -79.57  
 -50.16  
 -44.95  
 -34.94  
 -32.36  
 -27.81

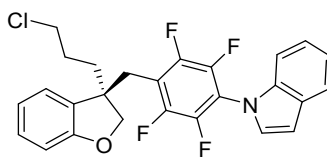

12

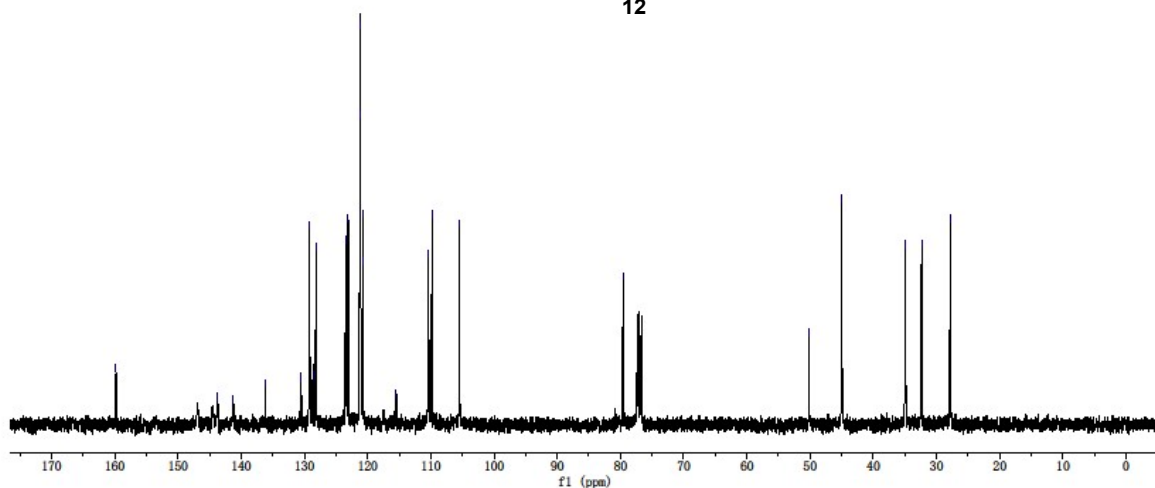

139.24  
 146.39  
 146.42  
 146.45  
 146.49  
 146.51  
 147.41  
 147.99

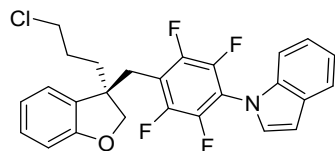

12

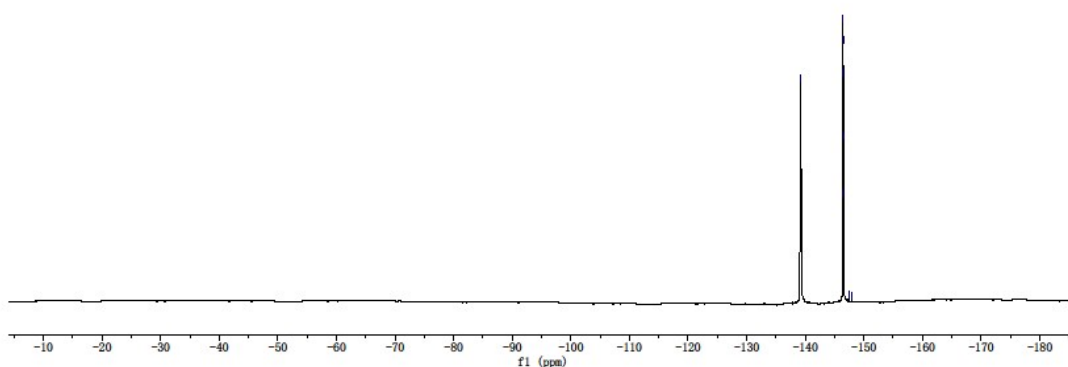

<Chromatogram>

mV

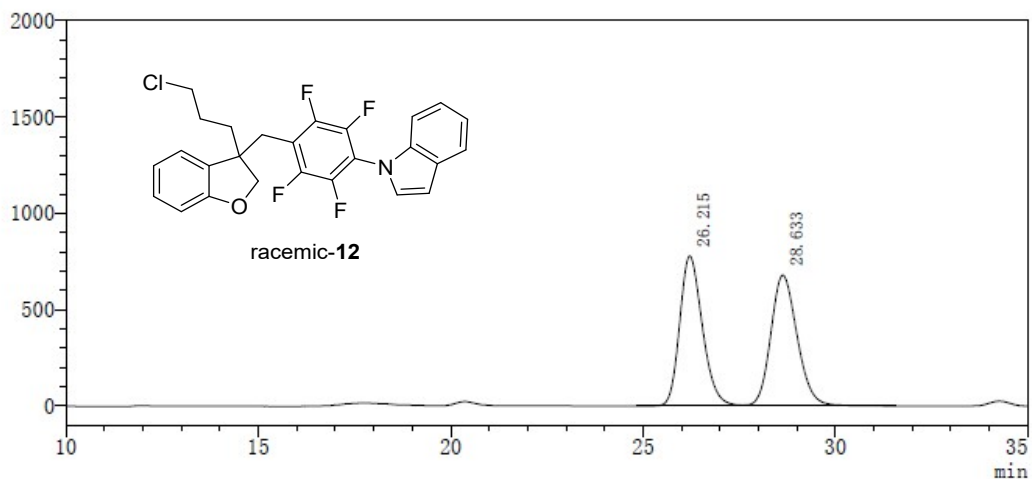

<Peak Table>

检测器A Ch2 210nm

| No.   | Ret. Time (min) | Height  | Height% | Area     | Area%   |
|-------|-----------------|---------|---------|----------|---------|
| 1     | 26.215          | 778161  | 53.425  | 32000741 | 49.609  |
| 2     | 28.633          | 678379  | 46.575  | 32505355 | 50.391  |
| Total |                 | 1456541 | 100.000 | 64506097 | 100.000 |

<Chromatogram>

mV

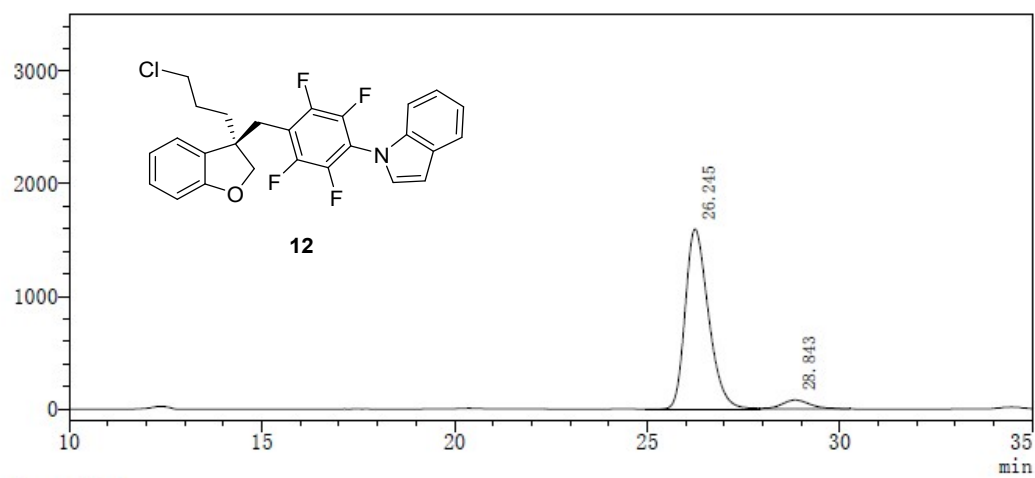

<Peak Table>

检测器A Ch2 210nm

| No.   | Ret. Time (min) | Height  | Height% | Area     | Area%   |
|-------|-----------------|---------|---------|----------|---------|
| 1     | 26.245          | 1596583 | 95.276  | 67045314 | 94.370  |
| 2     | 28.843          | 79159   | 4.724   | 3999910  | 5.630   |
| Total |                 | 1675741 | 100.000 | 71045224 | 100.000 |

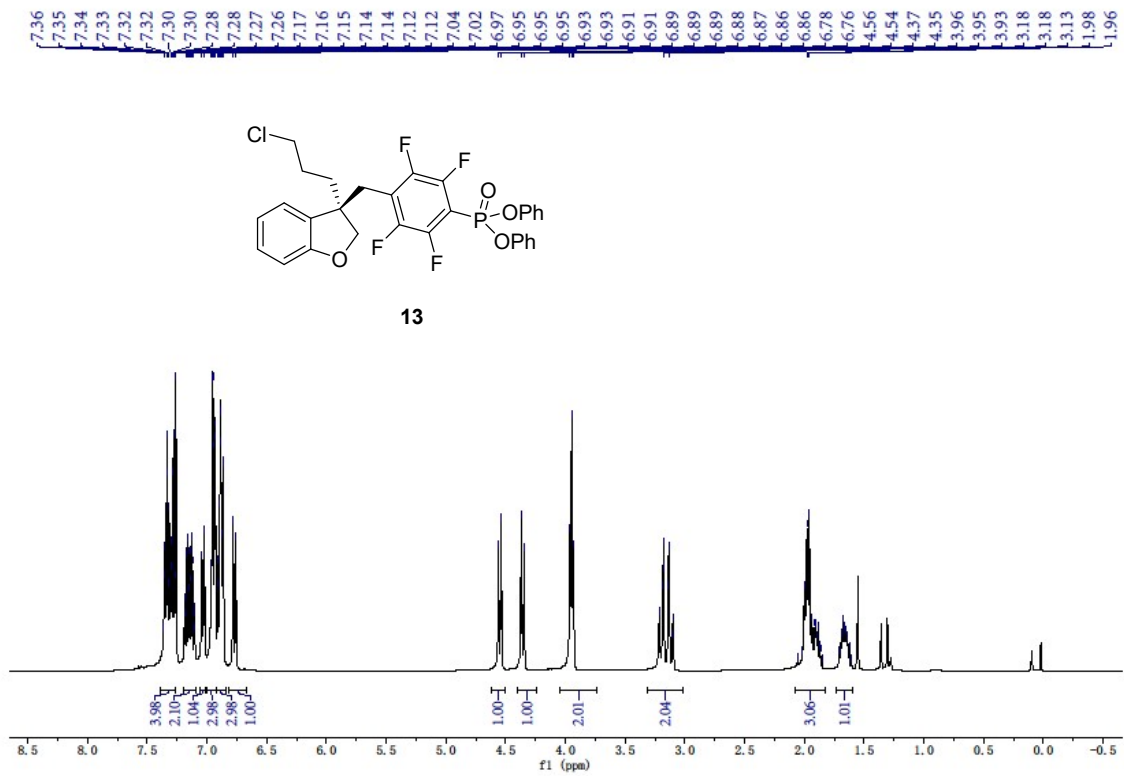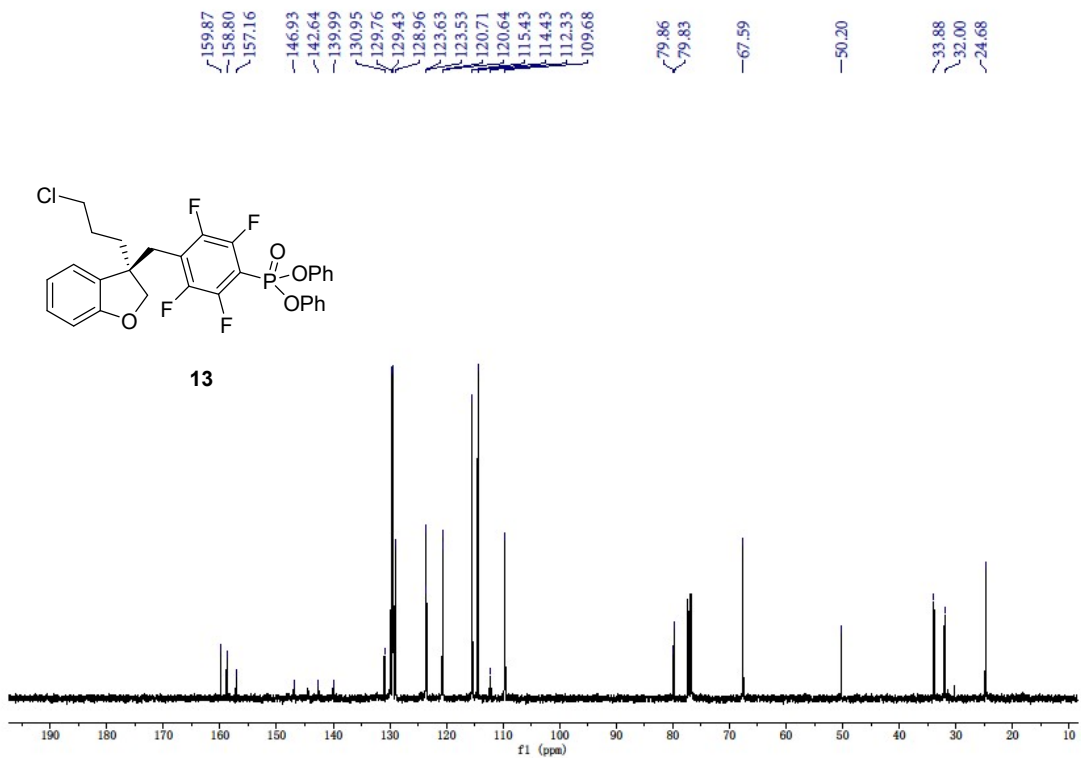

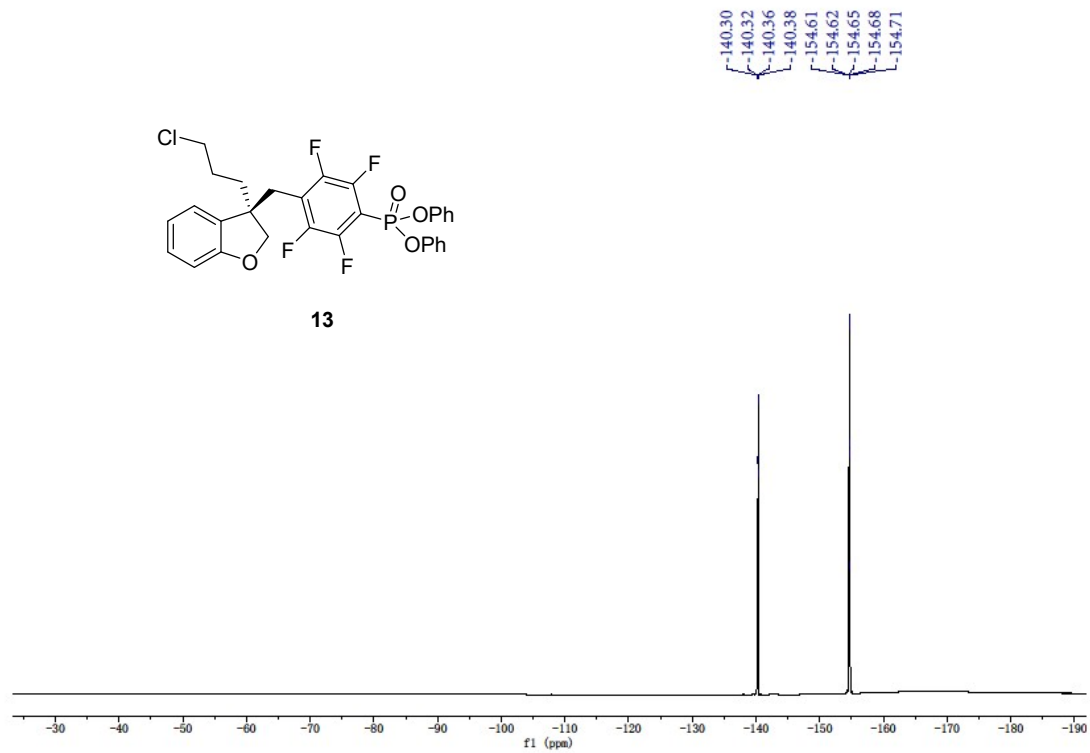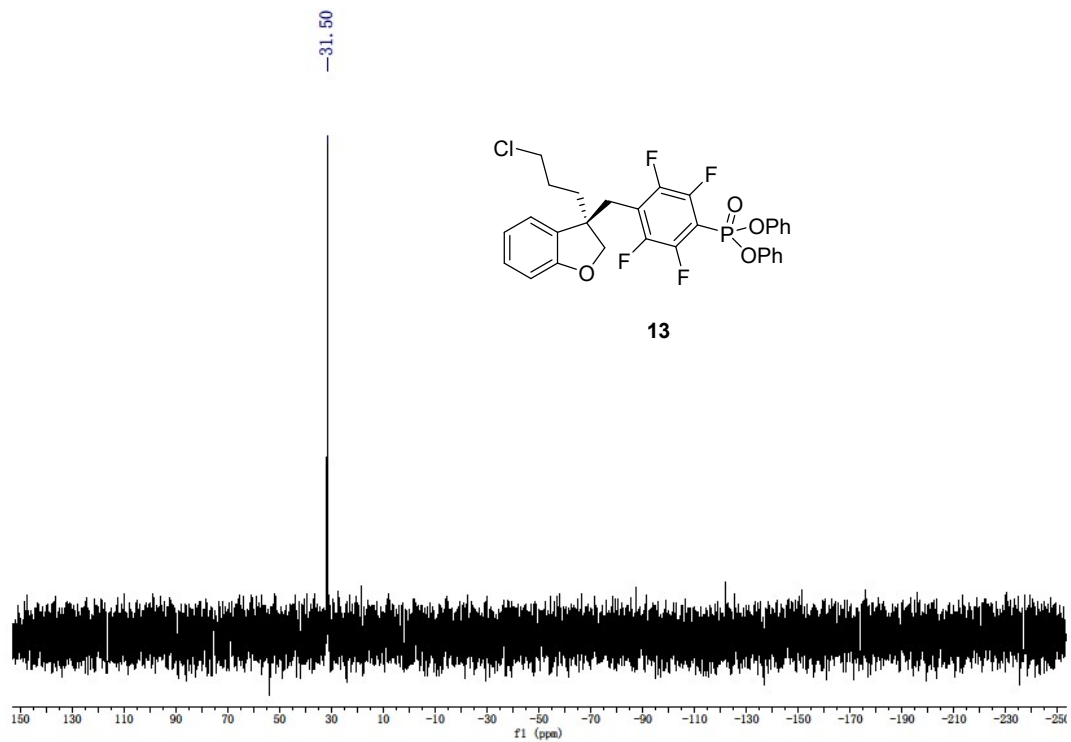

<Chromatogram>

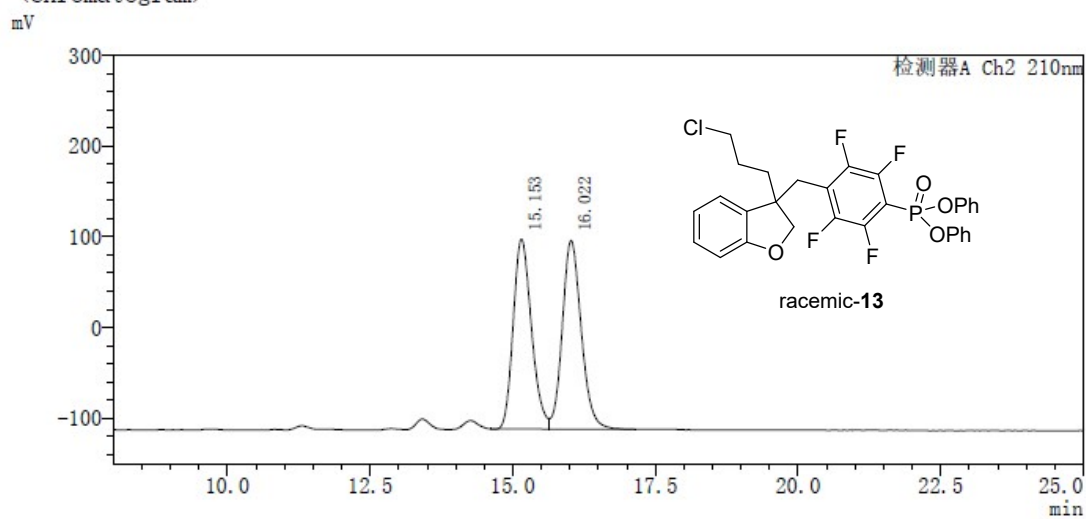

<Peak Table>

检测器A Ch2 210nm

| No.   | Ret. Time (min) | Height | Height% | Area    | Area%   |
|-------|-----------------|--------|---------|---------|---------|
| 1     | 15.153          | 209174 | 50.159  | 4647445 | 49.158  |
| 2     | 16.022          | 207849 | 49.841  | 4806708 | 50.842  |
| Total |                 | 417023 | 100.000 | 9454154 | 100.000 |

<Chromatogram>

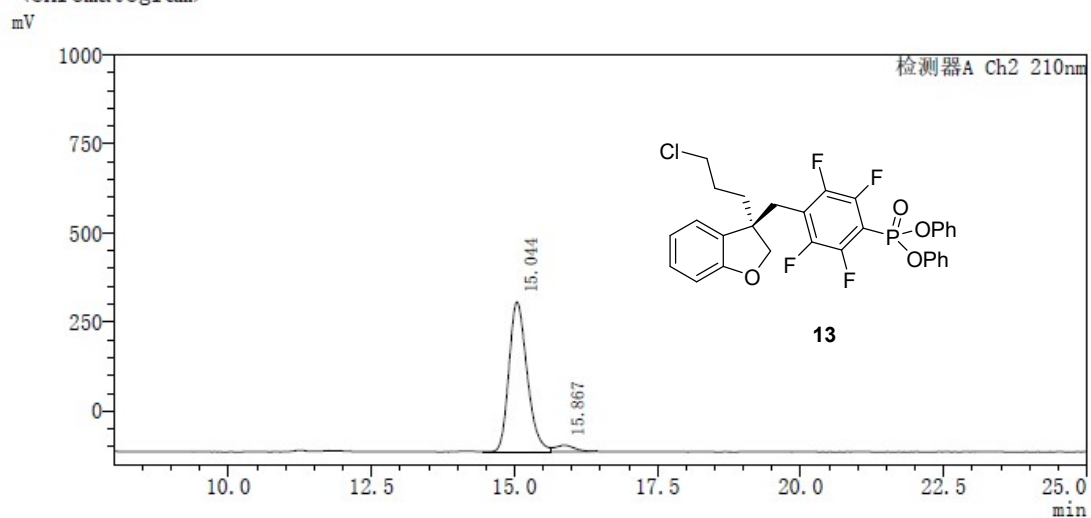

<Peak Table>

检测器A Ch2 210nm

| No.   | Ret. Time (min) | Height | Height% | Area    | Area%   |
|-------|-----------------|--------|---------|---------|---------|
| 1     | 15.044          | 419979 | 95.999  | 9291599 | 95.822  |
| 2     | 15.867          | 17505  | 4.001   | 405083  | 4.178   |
| Total |                 | 437483 | 100.000 | 9696682 | 100.000 |

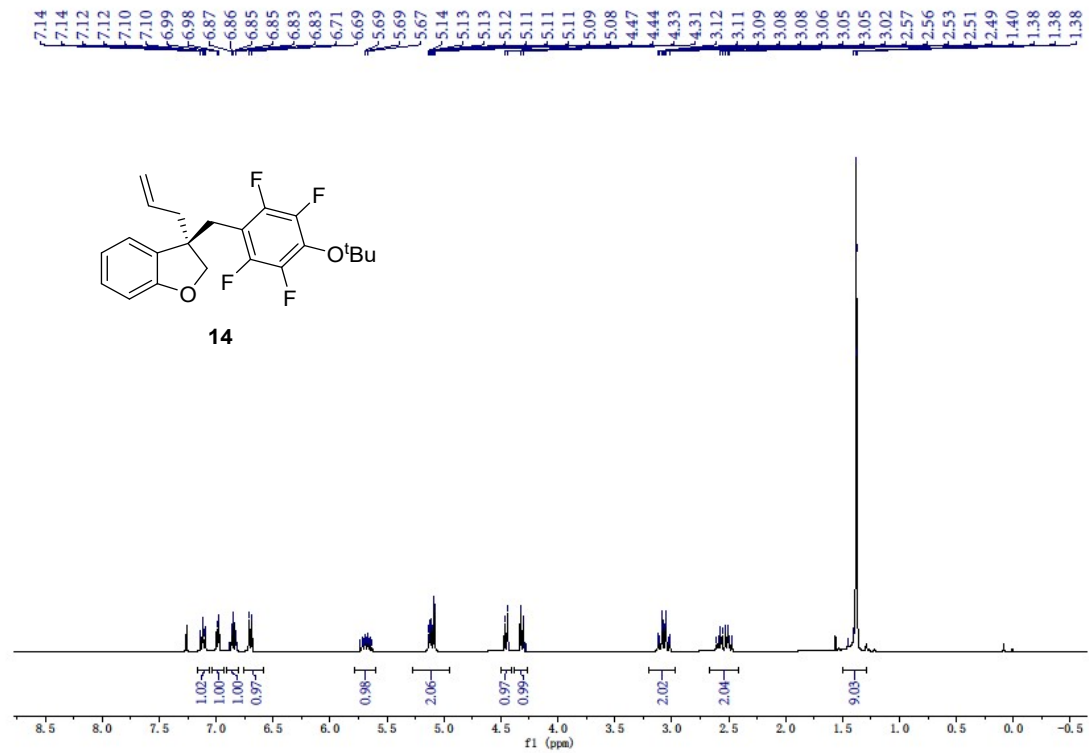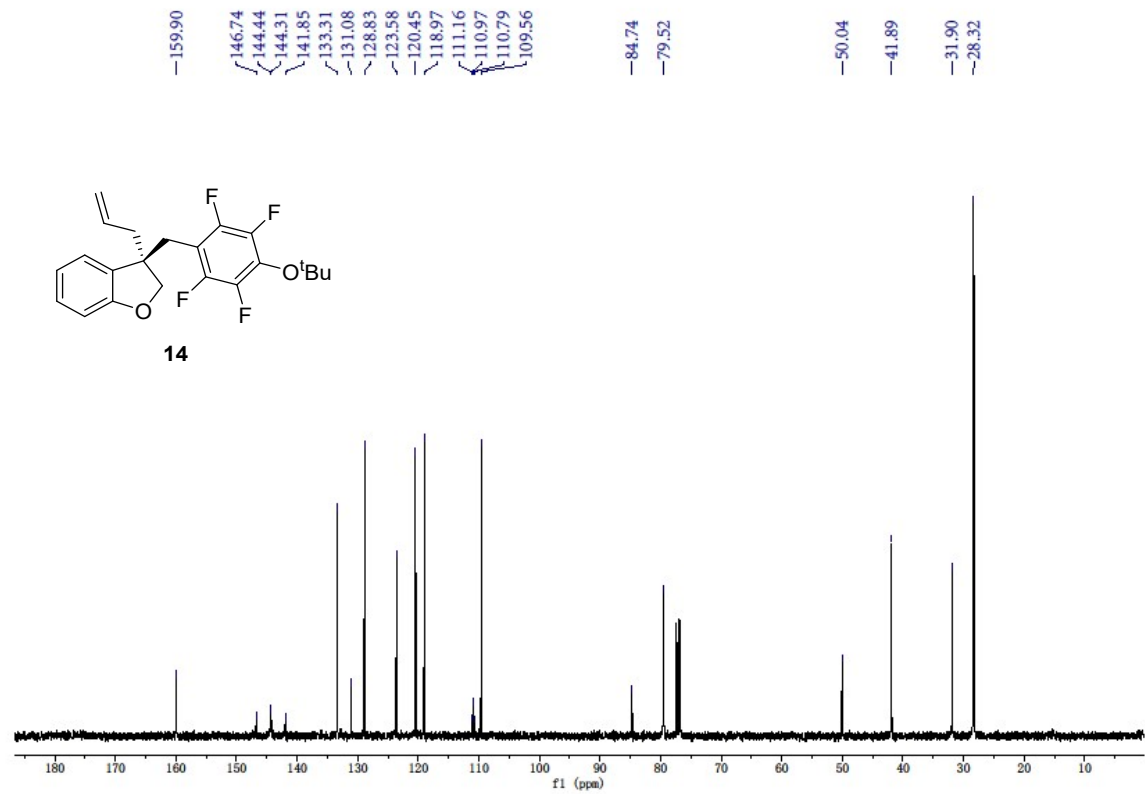

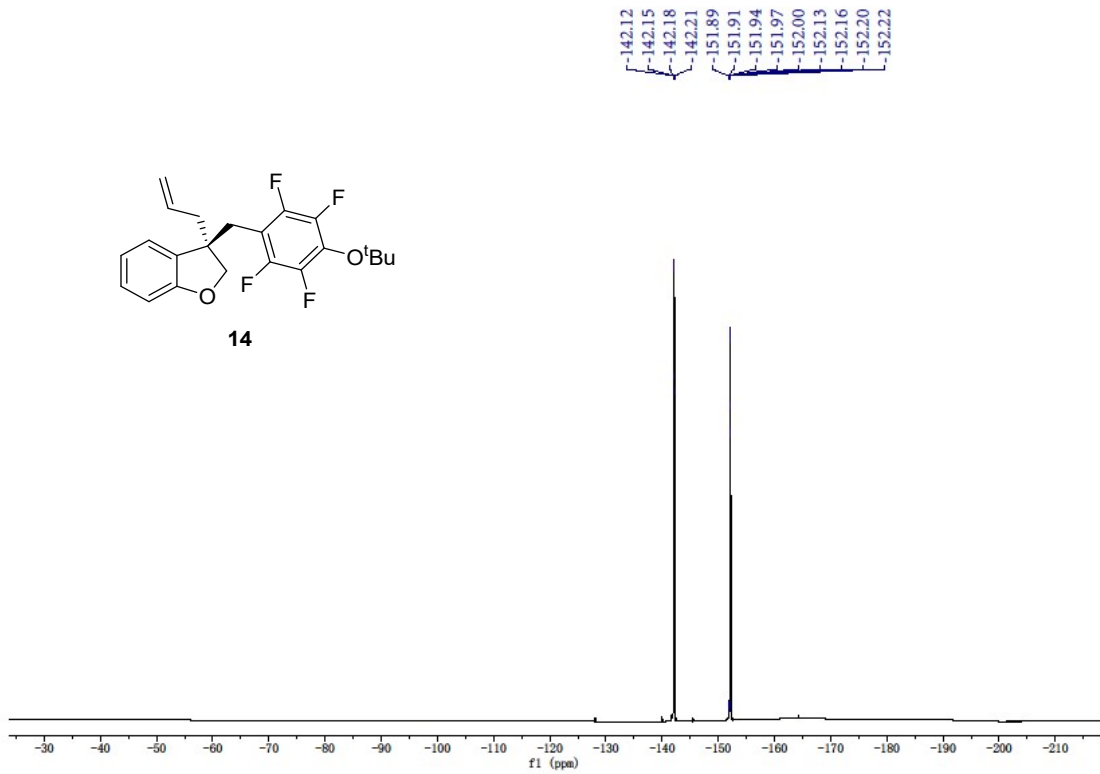

<Chromatogram>

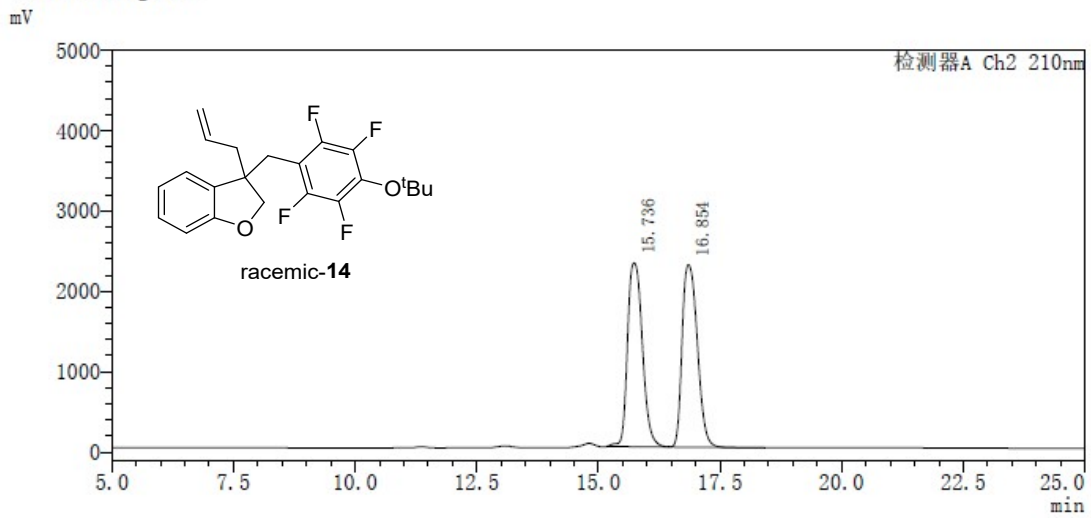

<Peak Table>

检测器A Ch2 210nm

| No.   | Ret. Time (min) | Height  | Height% | Area     | Area%   |
|-------|-----------------|---------|---------|----------|---------|
| 1     | 15.736          | 2287485 | 50.200  | 48643111 | 49.749  |
| 2     | 16.854          | 2269238 | 49.800  | 49133147 | 50.251  |
| Total |                 | 4556723 | 100.000 | 97776258 | 100.000 |



<Chromatogram>

mV

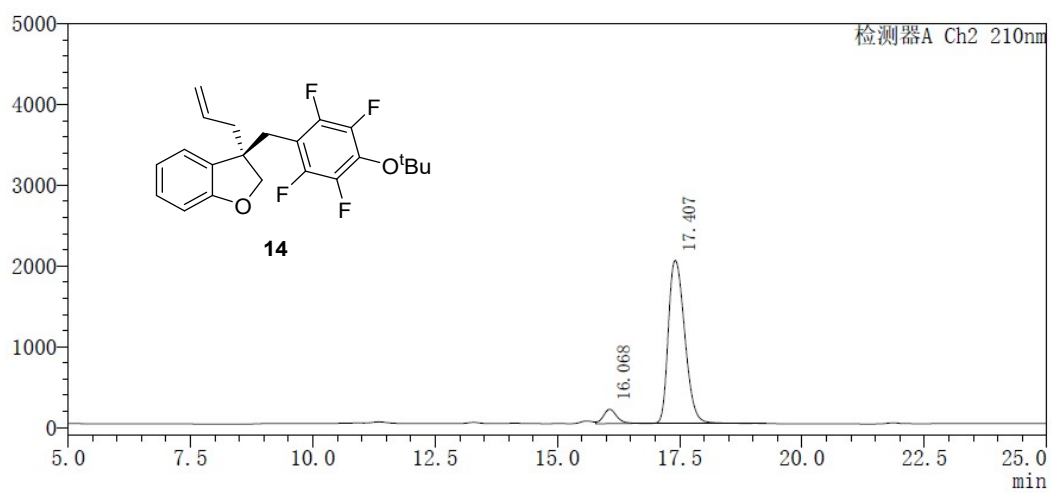

<Peak Table>

检测器A Ch2 210nm

| No.   | Ret. Time (min) | Height  | Height% | Area     | Area%   |
|-------|-----------------|---------|---------|----------|---------|
| 1     | 16.068          | 176423  | 8.028   | 3363185  | 6.609   |
| 2     | 17.407          | 2021272 | 91.972  | 47522120 | 93.391  |
| Total |                 | 2197694 | 100.000 | 50885305 | 100.000 |

## 15. References

- (1) Zhang, Z.-M., Xu, B., Wu, L., Zhou, L., Ji, D., Liu, Y., Li, Z., Zhang J. Palladium/XuPhos-Catalyzed Enantioselective Carboiodination of Olefin-Tethered Aryl Iodides. *J. Am. Chem. Soc.* **2019**, *141*, 8110–8115.
- (2) Xie, W.; Heo, J.; Kim, D.; Chang, S. Copper-Catalyzed Direct C–H Alkylation of Polyfluoroarenes by Using Hydrocarbons as an Alkylating Source. *J. Am. Chem. Soc.* **2020**, *142*, 7487–7496.
- (3) Li, S.-Q.; Xiong P.; Zhu L.; Qian X.-Y.; Xu H.-C. A General CuCl<sub>2</sub>-Promoted Alkene Aminochlorination Reaction. *Eur. J. Org. Chem.* **2016**, 3449–3455.
- (4) Menchikov, L. G.; Vorogushin, A. V.; Korneva, O. S.; Nefedov, D. M. An Effective Method for Alcohol Preparation by Hydrolysis of Organohalides in the Presence of Copper and its Salts in Aqueous DMSO. *Mendeleev Commun.* **1995**, *5*, 223–224.
- (5) Zhao, X.; Yu, Z.; Yan, S.; Wu, S.; Liu, R.; He, W.; Wang, L. Ruthenium(III) Chloride Catalyzed Efficient Synthesis of Unsymmetrical Diorganyl Selenides via Cleavage of Dibenzyl and Diphenyl Diselenides in the Presence of Zinc. *J. Org. Chem.* **2005**, *70*, 7338–7341.
- (6) Xie, W.; Heo, J.; Kim, D.; Chang, S. Copper-Catalyzed Direct C–H Alkylation of Polyfluoroarenes by Using Hydrocarbons as an Alkylating Source. *J. Am. Chem. Soc.* **2020**, *142*, 7487–7496.
- (7) Cohen, R. J.; Fox, D. L.; Eubank, J. F.; Salvatore, R. N. Mild and efficient Cs<sub>2</sub>CO<sub>3</sub>-promoted synthesis of phosphonates. *Tetrahedron Lett.* **2003**, *44*, 8617–8621.
- (8) Bartsch, R. A. Ionic Association in Base-Promoted  $\beta$ -Elimination Reactions. *Acc. Chem. Res.* **1975**, *8*, 239–245.
- (9) Tsvetkov, E. N.; Bondarenko, N. A.; Malakhova, I. G.; Kabachnik, M. I. A Simple Synthesis and Some Synthetic Applications of Substituted Phosphide and Phosphinite Anions. *Synthesis.* **1986**, 198–208.
- (10) Xu, B.; Ji, D.; Wu, L.; Zhou, L.; Liu, Y.; Zhang, Z.-M.; Zhang, J. Palladium/Xu-Phos-catalyzed enantioselective cascade Heck/remote C(sp<sup>2</sup>) –H alkylation

- reaction. *Chem.* **2022**, *8*, 836–849.
- (11) Ishu, K.; Kumar, D.; Maurya, N. K.; Yadav, S.; Chaudhary, D.; Kuram, M. R. Dicarbofunctionalization of Unactivated Alkenes by Palladium-Catalyzed Domino Heck/Intermolecular Direct Hetero Arylation with Heteroarenes. *Org. Biomol. Chem.* **2021**, *19*, 2243–2253.
